# Supplementary material for: A quest for stable phosphonyl radicals: limitations and possibilities of carbocyclic backbones and bulky substituents
Source: Royal Society of Chemistry journal article supplement (doi:10.1039/d3dt02658b), 2023-01-01
Supplement: d3dt02658b1.pdf [file d3dt02658b1.pdf]

## ELECTRONIC SUPPLEMENTARY INFORMATION

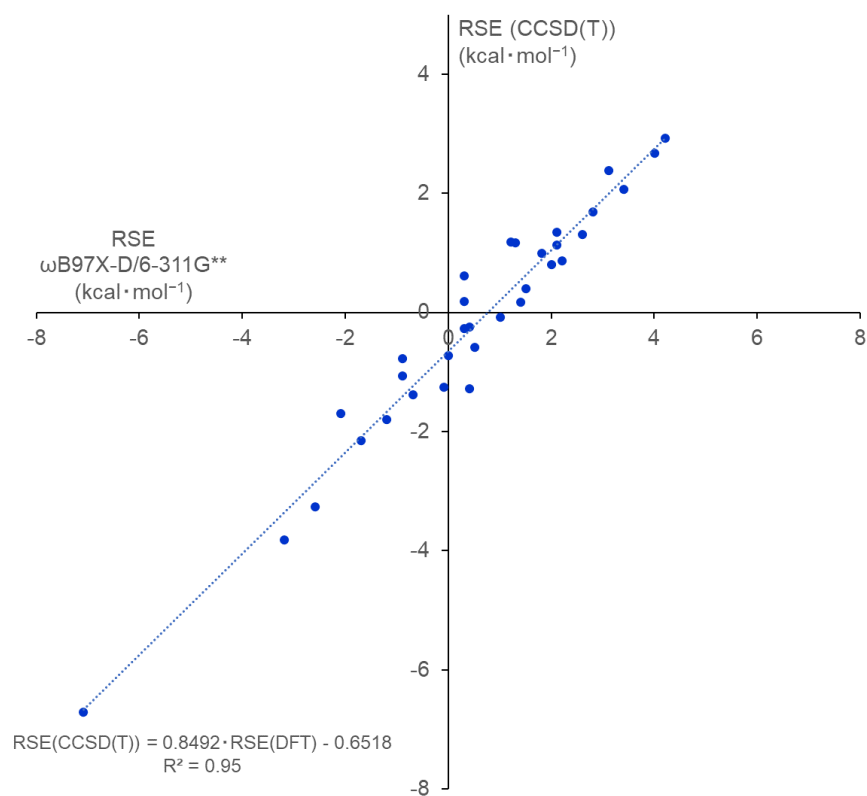

**Figure S1:** Correlation of the RSE values calculated at the (U)DF-CCSD(T)/aug-ccpVTZ//ωB97X-D/6-311G\*\* level and at the ωB97X-D/6-311G\*\* level

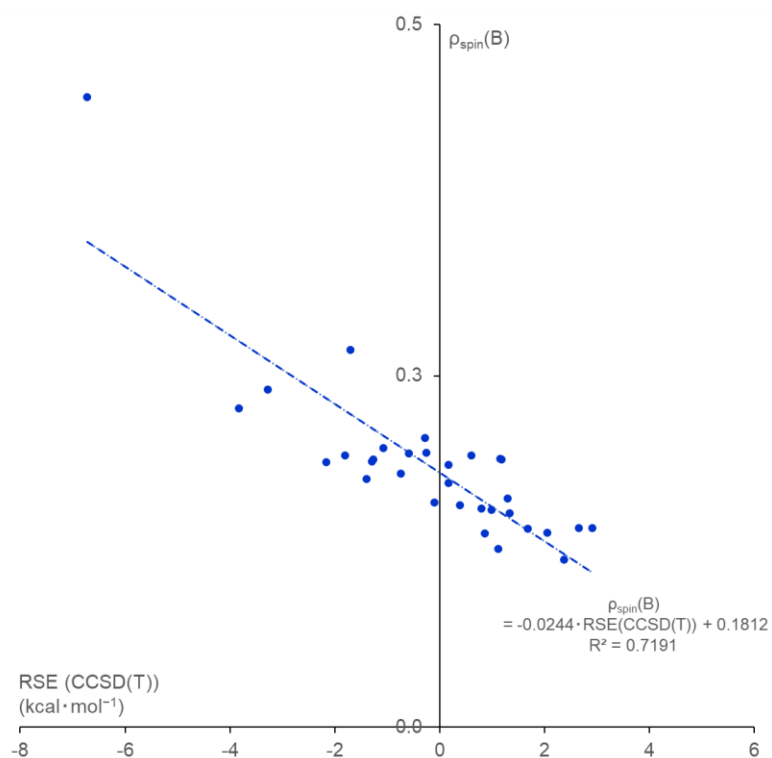

**Figure S2:** Plot of  $\rho_{spin}(B)$  versus  $RSE(CCSD(T))$

**Table S1:** Mulliken partial charges at the P- and O- atoms ( $q(P)$  and  $q(O)$ , respectively), calculated at the (U) $\omega$ B97X-D/6-311G\*\* level

| Radical   | $q(P)$ | $q(O)$ | Radical   | $q(P)$ | $q(O)$ |
|-----------|--------|--------|-----------|--------|--------|
| <b>1</b>  | 0.717  | -0.498 | <b>17</b> | 0.758  | -0.526 |
| <b>2</b>  | 0.770  | -0.505 | <b>18</b> | 0.800  | -0.530 |
| <b>3</b>  | 0.750  | -0.517 | <b>19</b> | 0.801  | -0.531 |
| <b>4</b>  | 0.786  | -0.510 | <b>20</b> | 0.786  | -0.521 |
| <b>5</b>  | 0.756  | -0.525 | <b>21</b> | 0.780  | -0.522 |
| <b>6</b>  | 0.785  | -0.526 | <b>22</b> | 0.822  | -0.540 |
| <b>7</b>  | 0.768  | -0.525 | <b>23</b> | 0.794  | -0.494 |
| <b>8</b>  | 0.962  | -0.499 | <b>24</b> | 0.840  | -0.511 |
| <b>9</b>  | 0.741  | -0.523 | <b>25</b> | 0.879  | -0.524 |
| <b>10</b> | 0.785  | -0.527 | <b>26</b> | 0.892  | -0.522 |
| <b>11</b> | 0.728  | -0.537 | <b>27</b> | 0.870  | -0.543 |
| <b>12</b> | 0.844  | -0.533 | <b>28</b> | 0.888  | -0.543 |
| <b>13</b> | 0.823  | -0.537 | <b>29</b> | 0.822  | -0.522 |
| <b>14</b> | 0.742  | -0.540 | <b>30</b> | 0.877  | -0.553 |
| <b>15</b> | 0.745  | -0.528 | <b>31</b> | 0.822  | -0.520 |
| <b>16</b> | 0.773  | -0.527 | <b>32</b> | 0.904  | -0.553 |

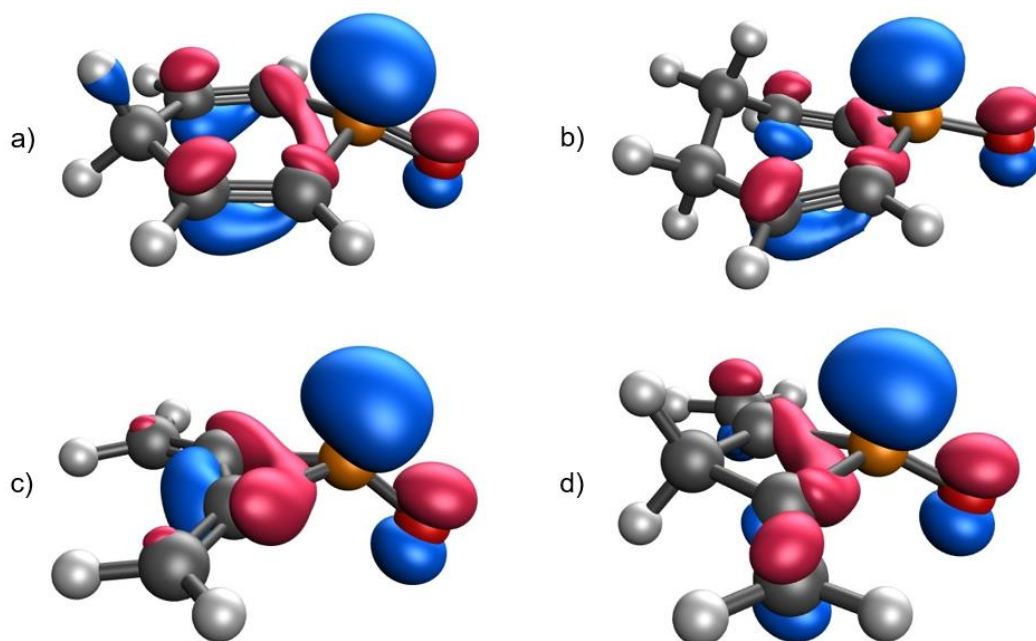

*Figure S3: SOMO of radical a) 12, b) 18, c) 23, d) 24*

*Table S2: Dimerization energy of parent  $H_2P^{\bullet}(O)$ , and unsubstituted radical 8 and radical 33*

|                                   | $\Delta E_{\text{dim}}$<br>(kcal/mol) | $\Delta G_{\text{dim}}$<br>(kcal/mol) |
|-----------------------------------|---------------------------------------|---------------------------------------|
| $H_2P^{\bullet}(O)$ , heterodimer | -79.1                                 | -63.1                                 |
| $H_2P^{\bullet}(O)$ , homodimer   | -58.0                                 | -42.0                                 |
| <b>8</b> , heterodimer            | -57.2                                 | -42.1                                 |
| <b>8</b> , homodimer              | -47.3                                 | -31.1                                 |
| <b>33</b> , heterodimer           | -62.0                                 | -46.5                                 |
| <b>33</b> , homodimer             | -58.8                                 | -41.4                                 |

**Table S3: SBA in degree at the  $U\omega B97X-D/6-311G^{**}$  level,  $\rho_{spin}(P)$ ,  $\rho_{spin}(O)$  and  $\rho_{spin}(B)$  values, and RSE values at the  $(U)\omega B97X-D/6-311G^{**}$  level in kcal/mol**

| <b>Radical</b> | <b>SBA</b> | <b><math>\rho_{spin}(P)</math></b> | <b><math>\rho_{spin}(O)</math></b> | <b><math>\rho_{spin}(B)</math></b> | <b>RSE (DFT)</b> |
|----------------|------------|------------------------------------|------------------------------------|------------------------------------|------------------|
| <b>8A</b>      | 360        | 0.376                              | 0.221                              | 0.403                              | -3.9             |
| <b>8B</b>      | 360        | 0.323                              | 0.215                              | 0.462                              | -7.7             |
| <b>8C</b>      | 360        | 0.277                              | 0.224                              | 0.499                              | -4.5             |
| <b>8D</b>      | 360        | 0.243                              | 0.208                              | 0.549                              | -9.7             |
| <b>8E</b>      | 360        | 0.361                              | 0.205                              | 0.434                              | -6.4             |
| <b>8F</b>      | 347        | 0.445                              | 0.264                              | 0.291                              | -3.0             |
| <b>8G</b>      | 360        | 0.327                              | 0.206                              | 0.467                              | -6.0             |
| <b>8H</b>      | 359        | 0.351                              | 0.199                              | 0.450                              | -4.5             |
| <b>8I</b>      | 355        | 0.399                              | 0.241                              | 0.360                              | -5.1             |
| <b>8J</b>      | 360        | 0.369                              | 0.192                              | 0.439                              | -10.9            |
| <b>8K</b>      | 360        | 0.300                              | 0.197                              | 0.503                              | -8.0             |
| <b>8L</b>      | 360        | 0.293                              | 0.182                              | 0.524                              | -15.9            |
| <b>8M</b>      | 360        | 0.361                              | 0.215                              | 0.424                              | -9.2             |
| <b>8N</b>      | 354        | 0.384                              | 0.224                              | 0.392                              | -2.5             |
| <b>8O</b>      | 360        | 0.360                              | 0.197                              | 0.444                              | -2.8             |
| <b>8P</b>      | 360        | 0.329                              | 0.197                              | 0.474                              | -4.9             |
| <b>33A</b>     | 360        | 0.309                              | 0.177                              | 0.514                              | -5.9             |
| <b>33B</b>     | 345        | 0.494                              | 0.249                              | 0.257                              | -1.9             |
| <b>33C</b>     | 360        | 0.223                              | 0.158                              | 0.618                              | -9.6             |
| <b>33D</b>     | 360        | 0.273                              | 0.184                              | 0.543                              | -5.1             |
| <b>33F</b>     | 360        | 0.288                              | 0.160                              | 0.552                              | -2.2             |
| <b>33G</b>     | 350        | 0.452                              | 0.217                              | 0.331                              | 0.4              |

**Total Energies and optimized geometries in cartesian coordinates**

**1**

8

E= -495.117297

|   |           |           |           |
|---|-----------|-----------|-----------|
| P | -0.020386 | -0.134429 | 0.175112  |
| C | 0.108364  | 0.021222  | 1.968277  |
| C | 1.471259  | -0.024865 | 1.184851  |
| H | 2.055959  | 0.889235  | 1.180400  |
| H | 2.062328  | -0.926790 | 1.309717  |
| H | -0.126482 | -0.855191 | 2.564359  |
| H | -0.142069 | 0.961740  | 2.447911  |
| O | -0.433670 | -1.432580 | -0.464252 |

**1H**

9

E= -495.756762

|   |           |           |           |
|---|-----------|-----------|-----------|
| P | -0.012376 | -0.212967 | 0.229807  |
| C | 0.125436  | -0.000762 | 1.998108  |
| C | 1.474946  | -0.032917 | 1.202574  |
| H | 2.048325  | 0.885898  | 1.141768  |
| H | 2.079247  | -0.920152 | 1.358797  |
| H | -0.061266 | -0.869444 | 2.620474  |
| H | -0.172409 | 0.938604  | 2.451474  |
| O | -0.485689 | -1.397247 | -0.525929 |
| H | -0.296145 | 1.057680  | -0.303421 |

**2**

6

E= -493.864503

|   |          |          |          |
|---|----------|----------|----------|
| C | 0.078989 | 0.033980 | 0.117280 |
| C | 0.079313 | 0.033775 | 1.454940 |

|   |           |           |           |
|---|-----------|-----------|-----------|
| P | 1.714629  | -0.072899 | 0.785702  |
| O | 2.633058  | -1.255408 | 0.785300  |
| H | -0.640850 | 0.013899  | 2.262306  |
| H | -0.641584 | 0.014334  | -0.689726 |

**2H**

7

E= -494.504268

|   |           |           |           |
|---|-----------|-----------|-----------|
| C | 0.084664  | 0.055580  | 0.159123  |
| C | 0.012328  | -0.056558 | 1.485676  |
| P | 1.659475  | -0.185946 | 0.894394  |
| O | 2.563157  | -1.354953 | 0.844355  |
| H | -0.740389 | -0.120569 | 2.259634  |
| H | -0.578947 | 0.128857  | -0.691736 |
| H | 2.324599  | 1.045403  | 1.035022  |

**3**

11

E= -534.459393

|   |           |           |           |
|---|-----------|-----------|-----------|
| P | 0.096163  | 0.025005  | 0.206654  |
| C | 0.125407  | -0.092956 | 2.060206  |
| C | 1.921419  | -0.120870 | 0.519425  |
| H | 2.595686  | 0.530112  | -0.034181 |
| H | 2.228801  | -1.162241 | 0.395651  |
| H | -0.062377 | -1.126455 | 2.361616  |
| H | -0.512333 | 0.578726  | 2.632092  |
| O | -0.633623 | -0.982495 | -0.625844 |
| C | 1.637203  | 0.244611  | 1.998868  |
| H | 1.804445  | 1.308500  | 2.174621  |
| H | 2.239250  | -0.321056 | 2.710873  |

**3H**

12  
E= -535.100550  
P 0.068007 -0.136944 0.209015  
C 0.115607 -0.183294 2.041176  
C 1.876663 -0.195361 0.502994  
H 2.529826 0.406145 -0.126764  
H 2.216985 -1.233158 0.505725  
H 0.064289 -1.218333 2.385987  
H -0.591613 0.427711 2.599336  
O -0.707485 -1.042074 -0.671871  
C 1.587217 0.307497 1.944949  
H 1.641375 1.396431 1.998424  
H 2.249663 -0.103075 2.706570  
H -0.132823 1.249274 -0.031560

**4**

9  
E= -533.217327  
C -0.018987 -0.010904 -0.067003  
C 0.181183 -0.452304 1.365419  
C 1.486021 -0.304241 1.629292  
P 1.781350 0.507894 0.036163  
O 2.798298 0.056984 -0.962580  
H 2.059796 -0.506988 2.522247  
H -0.167918 -0.833398 -0.768672  
H -0.761455 0.770114 -0.237883  
H -0.603171 -0.795786 2.034387

**4H**

10  
E= -533.856104  
C 0.035451 0.030207 -0.035544

C 0.176297 -0.490487 1.381103  
C 1.486683 -0.447891 1.651389  
P 1.852296 0.379402 0.087446  
O 2.858527 -0.043414 -0.912946  
H 2.038113 -0.743071 2.533043  
H -0.184862 -0.747500 -0.768973  
H -0.638407 0.877459 -0.180291  
H -0.636753 -0.802471 2.029897  
H 1.914710 1.755857 0.427618

**5**

14  
E= -573.793795  
P -0.251598 0.158931 -0.079168  
C 0.041939 -0.102516 1.736373  
C 1.553048 0.088766 1.924972  
C 2.005353 1.197992 0.961610  
C 1.426453 0.874557 -0.420804  
H -0.523353 0.642293 2.302743  
H -0.321200 -1.092959 2.013121  
H 2.071830 -0.841469 1.672022  
H 1.801657 0.332339 2.960458  
H 3.093896 1.279605 0.926970  
H 1.619186 2.162089 1.310065  
H 1.997873 0.088979 -0.924521  
H 1.371673 1.738302 -1.083096  
O -0.601782 -1.071504 -0.870665

**5H**

15  
E= -574.436234  
P -0.177839 -0.004785 -0.107362

C 0.085241 -0.216312 1.703976  
C 1.565509 0.122315 1.947985  
C 1.959600 1.217289 0.944442  
C 1.456033 0.761546 -0.431629  
H -0.571207 0.475138 2.239281  
H -0.182933 -1.232716 1.994653  
H 2.178770 -0.766522 1.768203  
H 1.743231 0.434267 2.979116  
H 3.037002 1.394999 0.939585  
H 1.479053 2.161416 1.224843  
H 2.096135 -0.024020 -0.844498  
H 1.386782 1.564446 -1.166544  
O -0.584656 -1.187700 -0.912977  
H -1.073568 1.095063 -0.185009

**6**

12

E= -572.557714

C -0.257265 -0.116093 0.115670  
C 0.100898 0.319270 1.546358  
C 1.339449 -0.428236 1.980938  
C 2.020901 -1.097618 1.050996  
P 1.282165 -0.875238 -0.579964  
O 1.121228 -2.058061 -1.488899  
H -0.622522 0.701614 -0.503885  
H -1.008125 -0.910936 0.112233  
H -0.722937 0.138332 2.242584  
H 0.304376 1.395136 1.583586  
H 1.651958 -0.380231 3.019927  
H 2.942070 -1.637267 1.226713

**6H**

13

E= -573.198239

C -0.228698 -0.066447 0.074511  
C 0.031465 0.185072 1.572029  
C 1.408799 -0.325103 1.911336  
C 2.070513 -1.012105 0.982828  
P 1.074342 -1.229190 -0.504490  
O 0.676593 -2.604173 -0.906811  
H -0.149809 0.859105 -0.499636  
H -1.208107 -0.503466 -0.122250  
H -0.705169 -0.325858 2.200351  
H -0.046639 1.248964 1.812876  
H 1.813226 -0.136307 2.901798  
H 3.047122 -1.455493 1.129050  
H 1.764827 -0.518207 -1.519450

**7**

12

E= -572.556709

C -0.018985 -0.004559 -0.021973  
C 0.176807 0.275297 1.442167  
C 1.222030 -0.281901 2.049869  
C 2.133222 -1.151861 1.229328  
P 1.541984 -0.884907 -0.511481  
O 1.378256 -2.114676 -1.357449  
H -0.173378 0.903962 -0.608107  
H -0.862845 -0.675060 -0.215545  
H -0.522530 0.915591 1.969083  
H 1.428039 -0.124228 3.103144  
H 2.027814 -2.216020 1.465108  
H 3.186418 -0.887066 1.345339

**7H**

13  
 E= -573.200113  
 C -0.058339 -0.113172 -0.007476  
 C 0.231039 0.337184 1.400899  
 C 1.279806 -0.219126 2.007125  
 C 2.060825 -1.237245 1.217472  
 P 1.535436 -0.878777 -0.505970  
 O 1.561863 -1.949559 -1.534377  
 H -0.344167 0.701786 -0.675018  
 H -0.845624 -0.873101 -0.048651  
 H -0.394929 1.078760 1.884193  
 H 1.569939 0.036508 3.019954  
 H 1.778630 -2.265088 1.468275  
 H 3.141724 -1.147207 1.339990  
 H 2.316248 0.269318 -0.803216

**8**

10  
 E= -571.326600  
 C 0.190710 -0.353080 0.009545  
 P 0.206270 -0.394636 1.740617  
 O 1.124973 0.227216 2.720590  
 C -0.886212 -1.106087 -0.376487  
 C -1.652277 -1.683362 0.707804  
 C -1.190377 -1.393616 1.964154  
 H 0.890211 0.162921 -0.627711  
 H -1.155080 -1.265378 -1.412576  
 H -2.524604 -2.297472 0.525954  
 H -1.605910 -1.716941 2.904616

**8H**

## 11

E= -571.954267  
 C 0.108664 -0.269379 0.018738  
 P 0.070782 -0.131748 1.828773  
 O 1.312284 -0.244606 2.633234  
 C -0.841489 -1.123200 -0.370925  
 C -1.612810 -1.749440 0.732188  
 C -1.249472 -1.371229 1.960350  
 H 0.773084 0.281791 -0.631415  
 H -1.057397 -1.362361 -1.406117  
 H -2.407143 -2.457180 0.523391  
 H -1.688265 -1.713912 2.886605  
 H -0.656099 1.076826 2.006099

**9**

17  
 E= -613.112090  
 P 0.348191 0.049673 -0.190381  
 C 0.202226 0.125821 1.641142  
 O 1.111397 -1.137573 -0.708309  
 C -0.728736 1.259430 2.093182  
 H -0.182501 -0.848230 1.966503  
 H 1.204108 0.237930 2.060954  
 C -2.139932 1.150147 1.508694  
 H -0.781802 1.255567 3.185627  
 H -0.294244 2.224901 1.807855  
 C -2.173625 1.252482 -0.018861  
 H -2.586597 0.196534 1.817408  
 H -2.765689 1.939816 1.934157  
 C -1.411834 0.117876 -0.717901  
 H -3.211027 1.244254 -0.365254  
 H -1.752905 2.217774 -0.324715



H -1.851675 -0.856352 -0.472821  
H -1.440842 0.225230 -1.804279

**9H**

18

E= -613.757420

P 0.281270 0.000776 -0.174343  
C 0.160456 0.114038 1.638799  
O 1.099068 -1.114237 -0.724054  
C -0.762782 1.255221 2.090886  
H -0.215646 -0.853283 1.988846  
H 1.170292 0.230807 2.039756  
C -2.181353 1.140400 1.525329  
H -0.799953 1.268255 3.183676  
H -0.331724 2.217005 1.787328  
C -2.228585 1.212625 -0.003697  
H -2.628573 0.195203 1.857541  
H -2.799150 1.941204 1.941352  
C -1.465076 0.067408 -0.685255  
H -3.267974 1.195829 -0.343015  
H -1.814785 2.174226 -0.330909  
H -1.904239 -0.902101 -0.426580  
H -1.497132 0.154660 -1.774083  
H 0.730399 1.307598 -0.514578

**10**

15

E= -611.873798

P 0.072187 0.063920 -0.012522  
C -0.006635 0.135338 1.818951  
C 1.406458 0.006787 2.399817  
C 2.315513 1.180676 2.029932

C 2.367573 1.509540 0.563736  
C 1.490790 1.115073 -0.365145  
O -1.188488 0.419156 -0.748489  
H -0.467409 1.090700 2.092433  
H -0.659475 -0.664098 2.174098  
H 1.345737 -0.074021 3.488331  
H 1.861595 -0.924312 2.043823  
H 1.993959 2.084258 2.565968  
H 3.332269 0.979094 2.381836  
H 3.187765 2.155376 0.255840  
H 1.617428 1.412364 -1.401408

**10H**

16

E= -612.515553

P -0.073100 0.189485 0.022553  
C -0.062126 0.213311 1.840880  
C 1.358607 -0.006876 2.371210  
C 2.307210 1.134526 2.000867  
C 2.325569 1.487521 0.539205  
C 1.425272 1.116404 -0.371629  
O -1.306413 0.655192 -0.665837  
H -0.455671 1.186104 2.151774  
H -0.752735 -0.552409 2.201241  
H 1.332097 -0.121001 3.457904  
H 1.757657 -0.946789 1.971716  
H 2.044510 2.038659 2.566477  
H 3.325914 0.880688 2.310934  
H 3.156366 2.114453 0.220607  
H 1.529657 1.432747 -1.405028  
H 0.282817 -1.157861 -0.257273

**11**  
15  
E= -611.871883  
C 0.064025 -0.086280 0.281449  
P 0.077384 -0.060479 2.123183  
O 1.440882 -0.291407 2.719885  
C -0.070904 -1.474172 -0.299168  
C -0.364391 -2.590679 0.361137  
C -0.639742 -2.715063 1.836479  
C -1.107834 -1.408648 2.492705  
H -0.742567 0.561172 -0.081293  
H 1.003416 0.371636 -0.041617  
H 0.103410 -1.539075 -1.370431  
H -0.395475 -3.518328 -0.203358  
H -1.398496 -3.487466 1.997519  
H 0.267461 -3.066566 2.341514  
H -2.083081 -1.106909 2.096831  
H -1.195982 -1.517661 3.575086

**11H**  
16  
E= -612.515409  
C 0.019016 -0.114419 0.277519  
P 0.085946 -0.121070 2.102212  
O 1.435519 -0.263140 2.712792  
C -0.055812 -1.504364 -0.306591  
C -0.340452 -2.625076 0.351549  
C -0.648997 -2.751806 1.820688  
C -1.104214 -1.442098 2.475028  
H -0.838280 0.488479 -0.046620  
H 0.917276 0.398756 -0.078104  
H 0.154383 -1.571750 -1.370267

H -0.332443 -3.556534 -0.207351  
H -1.421911 -3.513087 1.961476  
H 0.242528 -3.125678 2.337845  
H -2.078270 -1.131513 2.080059  
H -1.193019 -1.550595 3.557954  
H -0.611176 1.064843 2.452792

**12**  
13  
E= -610.636539  
C 0.345769 -0.328031 0.070211  
P 0.000622 -0.017762 1.801494  
O 1.167870 0.281866 2.695604  
C -0.377990 -1.178114 -0.662197  
C -1.502729 -2.036776 -0.162730  
C -1.645965 -2.167482 1.325294  
C -1.039863 -1.409221 2.242021  
H 1.142249 0.254307 -0.380638  
H -0.149429 -1.282254 -1.720222  
H -2.448190 -1.654012 -0.575363  
H -1.402198 -3.038768 -0.597323  
H -2.305542 -2.964850 1.659469  
H -1.206142 -1.578497 3.300528

**12H**  
14  
E= -611.275382  
C 0.259201 -0.228529 0.101080  
P 0.157776 -0.150237 1.895155  
O 1.441184 -0.285374 2.634029  
C -0.428685 -1.096884 -0.637345  
C -1.429213 -2.092047 -0.138070

C -1.677120 -2.144104 1.337253  
C -1.107205 -1.374993 2.262608  
H 0.971837 0.441826 -0.369385  
H -0.271368 -1.108935 -1.713853  
H -2.385875 -1.910046 -0.646328  
H -1.128429 -3.092084 -0.478294  
H -2.400008 -2.893792 1.652122  
H -1.355053 -1.510063 3.310886  
H -0.505055 1.081668 2.130162

**13**

13

E= -610.638814

C -0.033709 -0.217172 0.053437  
C 0.025374 0.237227 1.487037  
C 1.112070 0.166179 2.263671  
C 2.412307 -0.335530 1.823484  
C 2.725087 -0.611867 0.542748  
P 1.603259 -0.191694 -0.781099  
O 1.684569 -0.978868 -2.054510  
H -0.729212 0.392840 -0.526176  
H -0.405426 -1.250765 -0.000209  
H -0.905430 0.592408 1.918450  
H 1.032620 0.476995 3.299670  
H 3.160247 -0.498176 2.594323  
H 3.715177 -0.962256 0.271987

**13H**

14

E= -611.279609

C -0.077741 0.020153 0.040917  
P 0.119009 -0.120563 1.854573

O 1.479015 -0.419935 2.374372  
C -0.391275 -1.283112 -0.631536  
C -1.096423 -2.257460 -0.048932  
C -1.576856 -2.202212 1.332267  
C -1.174501 -1.307704 2.246938  
H -0.908664 0.720305 -0.123085  
H 0.821678 0.482840 -0.370966  
H -0.048884 -1.409888 -1.653130  
H -1.329370 -3.153120 -0.613837  
H -2.290005 -2.968029 1.626040  
H -1.528532 -1.364911 3.270419  
H -0.424593 1.107627 2.306562

**14**

20

E= -652.420593

P 0.221816 0.104520 0.053921  
C -0.059700 -0.275550 1.833230  
O 1.054986 1.348905 -0.124437  
C -0.365297 0.982521 2.661943  
H -0.857277 -1.022974 1.910301  
H 0.858977 -0.743878 2.195655  
C -1.781988 1.540349 2.516561  
H -0.198240 0.744152 3.717386  
H 0.364060 1.752769 2.394013  
C -2.234922 1.925261 1.100632  
H -2.499299 0.816945 2.926012  
H -1.850737 2.427691 3.153956  
C -2.571686 0.733623 0.186151  
H -3.131526 2.543460 1.199985  
H -1.476589 2.558505 0.625421  
H -2.922435 -0.102652 0.800907

H -3.413386 0.998984 -0.461082  
C -1.439029 0.252577 -0.733824  
H -1.275411 0.961666 -1.550695  
H -1.701154 -0.707559 -1.187172

### 14H

21

E= -653.062829

P 0.150788 -0.092220 0.099916  
C -0.139287 -0.262287 1.890297  
O 1.302633 0.783702 -0.260276  
C -0.378516 1.068920 2.614773  
H -0.962691 -0.966816 2.056741  
H 0.770830 -0.737620 2.268702  
C -1.815920 1.586377 2.549154  
H -0.111391 0.938687 3.667507  
H 0.310016 1.821317 2.215161  
C -2.357438 1.940883 1.160129  
H -2.484044 0.846196 3.008806  
H -1.877361 2.481440 3.176485  
C -2.608012 0.752280 0.216068  
H -3.306229 2.466206 1.304458  
H -1.684859 2.658553 0.674550  
H -2.925387 -0.119792 0.799290  
H -3.451246 0.993826 -0.437697  
C -1.432930 0.382088 -0.696072  
H -1.172064 1.235184 -1.330183  
H -1.718875 -0.433939 -1.366673  
H 0.296362 -1.454020 -0.280271

### 15

18

E= -651.182964

C -0.051171 -0.022122 0.043548  
C -0.012046 -0.043291 1.573679  
C 1.377669 0.017779 2.213329  
C 2.242130 -1.246862 2.047499  
C 2.978150 -1.379543 0.737253  
C 2.427165 -1.477590 -0.474747  
P 0.655294 -1.499055 -0.796622  
O 0.314699 -1.575369 -2.258800  
H -1.084443 0.034322 -0.308462  
H 0.479471 0.851675 -0.350159  
H -0.589051 0.816062 1.928784  
H -0.535525 -0.934288 1.940383  
H 1.924495 0.886940 1.831293  
H 1.238180 0.185400 3.285467  
H 2.975995 -1.272567 2.855776  
H 1.604052 -2.129686 2.189661  
H 4.063646 -1.405036 0.799148  
H 3.048686 -1.620169 -1.354381

### 15H

19

E= -651.823629

C -0.023770 0.002319 0.015688  
C -0.003623 -0.042558 1.547937  
C 1.374979 -0.000715 2.213934  
C 2.243567 -1.261164 2.037763  
C 2.983589 -1.362277 0.725670  
C 2.435346 -1.448409 -0.484246  
P 0.658906 -1.466333 -0.820657  
O 0.318988 -1.603497 -2.262258  
H -1.053964 0.085990 -0.343263

H 0.521460 0.871916 -0.363702  
H -0.584080 0.810182 1.912141  
H -0.537783 -0.937101 1.892057  
H 1.930838 0.875105 1.861715  
H 1.215352 0.143999 3.286584  
H 2.975671 -1.292391 2.847390  
H 1.610525 -2.148763 2.169373  
H 4.069535 -1.365493 0.790540  
H 3.058823 -1.517209 -1.370687  
H 0.183909 -2.511356 0.022537

**16**

18  
E= -651.181340

C 0.043059 0.000410 0.030597  
C -0.009700 -0.009670 1.564862  
C 1.377583 -0.030742 2.218838  
C 2.379659 -1.051274 1.745343  
C 2.196085 -2.170920 1.048251  
C 0.889931 -2.743536 0.567471  
P 0.065828 -1.688950 -0.712234  
O 0.712547 -1.741648 -2.067321  
H -0.818710 0.519431 -0.394730  
H 0.939762 0.512140 -0.333229  
H -0.522038 0.893360 1.908014  
H -0.622008 -0.842736 1.923849  
H 1.833578 0.955229 2.065969  
H 1.263076 -0.126279 3.306101  
H 3.405993 -0.815086 2.016529  
H 3.079818 -2.738904 0.773841  
H 0.182060 -2.889888 1.386931  
H 1.039793 -3.716361 0.096787

**16H**

19  
E= -651.825272  
C 0.103532 0.007366 -0.007126  
C -0.007992 -0.015378 1.523990  
C 1.357140 -0.041683 2.223421  
C 2.377325 -1.057887 1.778589  
C 2.227688 -2.165955 1.055690  
C 0.943064 -2.720616 0.499780  
P 0.165154 -1.650024 -0.766895  
O 0.742231 -1.712473 -2.136192  
H -0.743662 0.522700 -0.466715  
H 1.007711 0.533111 -0.327394  
H -0.534142 0.882417 1.858983  
H -0.629920 -0.854364 1.853039  
H 1.816985 0.945812 2.093266  
H 1.207083 -0.146088 3.305352  
H 3.388596 -0.830876 2.108226  
H 3.121799 -2.739185 0.832970  
H 0.203903 -2.891980 1.288429  
H 1.114907 -3.683343 0.014027  
H -1.191467 -2.069854 -0.672456

**17**

18  
E= -651.180817  
P 0.091487 -0.569841 0.040216  
C 0.037103 0.224646 1.699797  
C 1.307613 0.015349 2.534857  
C 2.449473 0.948986 2.200536  
C 2.902255 1.334211 1.008830

C 2.473971 0.906297 -0.371121  
C 1.852125 -0.493834 -0.478843  
O -0.840805 0.075201 -0.949646  
H 1.852436 -0.829361 -1.518882  
H 2.433751 -1.217993 0.098462  
H 3.362201 0.929022 -1.011164  
H 1.789634 1.648450 -0.800500  
H 3.712113 2.059965 1.012915  
H 2.948410 1.377326 3.065885  
H 1.635244 -1.030703 2.474807  
H 1.048996 0.171219 3.585150  
H -0.145139 1.290542 1.531413  
H -0.837790 -0.176194 2.217231

**17H**

19  
E= -651.825173  
P 0.055639 -0.424495 -0.026935  
C 0.026269 0.361793 1.613837  
C 1.238507 0.033630 2.496492  
C 2.474941 0.856809 2.215193  
C 2.957990 1.276741 1.047303  
C 2.466369 0.993559 -0.351169  
C 1.801918 -0.376391 -0.546124  
O -0.922992 0.119094 -1.008685  
H 1.796967 -0.651926 -1.604202  
H 2.359851 -1.149348 -0.008242  
H 3.327749 1.054615 -1.021746  
H 1.788646 1.790512 -0.683385  
H 3.844300 1.905003 1.089578  
H 3.025929 1.157326 3.102584  
H 1.473686 -1.038219 2.438194

H 0.957190 0.203444 3.538693  
H -0.051554 1.440473 1.451342  
H -0.904199 0.042769 2.091020  
H -0.115995 -1.798185 0.298096

**18**

16  
E= -649.944805  
C 0.113434 0.192672 0.017238  
C 0.058868 0.104499 1.346731  
C 1.274526 -0.005020 2.228515  
C 1.956061 -1.380010 2.185474  
C 2.701535 -1.732812 0.929299  
C 2.658859 -1.168724 -0.281668  
P 1.678530 0.222763 -0.867686  
O 1.568095 0.295651 -2.362650  
H -0.779818 0.305799 -0.589150  
H -0.913262 0.098789 1.833221  
H 2.006826 0.759351 1.939041  
H 0.994226 0.208993 3.261981  
H 2.670573 -1.439034 3.014405  
H 1.217563 -2.167997 2.382454  
H 3.372603 -2.582672 1.043096  
H 3.315663 -1.548585 -1.060146  
**18H**  
17  
E= -650.581020  
C -0.044998 -0.050164 0.040185  
C 0.028105 0.058102 1.364219  
C 1.330273 0.114255 2.119900  
C 2.027552 -1.248406 2.212834

C 2.603725 -1.821639 0.950027  
C 2.454779 -1.432173 -0.316938  
P 1.448939 -0.081198 -0.978541  
O 2.141738 1.220269 -1.192286  
H -1.003487 -0.086244 -0.468306  
H -0.889903 0.090475 1.946652  
H 2.005288 0.832379 1.641985  
H 1.149379 0.478975 3.133120  
H 2.851960 -1.165053 2.929920  
H 1.345506 -1.995096 2.642163  
H 3.240976 -2.687892 1.123580  
H 3.003615 -1.974489 -1.083097  
H 0.966311 -0.693698 -2.162529

## 19

16

E= -649.948474

C 0.287851 -0.033296 0.001586  
C 0.037779 0.332281 1.461511  
C 0.972628 -0.200853 2.507033  
C 1.881902 -1.187220 2.496055  
C 2.272137 -2.169041 1.484853  
C 1.686474 -2.520447 0.326479  
P 0.184090 -1.834209 -0.347702  
O -0.074862 -2.183466 -1.785724  
H -0.458378 0.443484 -0.637477  
H 1.275860 0.305526 -0.323526  
H 0.061944 1.425299 1.539658  
H -0.983522 0.050814 1.747592  
H 0.888644 0.334178 3.450542  
H 2.436683 -1.304456 3.423224  
H 3.167549 -2.725261 1.752338

H 2.112392 -3.329894 -0.259293

## 19H

17

E= -650.587840

C 0.340170 0.079231 -0.039964  
C -0.061778 0.024304 1.441057  
C 1.122242 -0.059062 2.363262  
C 2.033572 -1.035027 2.394505  
C 2.069624 -2.269570 1.606714  
C 1.512689 -2.574292 0.427545  
P 0.597855 -1.569281 -0.762486  
O 1.161846 -1.599262 -2.138522  
H -0.438609 0.545391 -0.649210  
H 1.254911 0.658877 -0.183870  
H -0.649992 0.909283 1.689315  
H -0.720902 -0.837983 1.616311  
H 1.247556 0.761063 3.064174  
H 2.827749 -0.950934 3.130544  
H 2.656437 -3.059320 2.072307  
H 1.684400 -3.575052 0.037392  
H -0.706168 -2.124719 -0.648284

## 20

16

E= -649.943116

C 0.018563 -0.011130 -0.062378  
C -0.016862 0.081251 1.435736  
C 1.058034 0.013540 2.213784  
C 2.484874 -0.095083 1.728894  
C 2.867416 -1.288022 0.887683  
C 2.147019 -1.973187 -0.005198

P 0.443359 -1.737306 -0.547127  
O 0.250173 -2.063856 -2.001761  
H -0.943269 0.231551 -0.514464  
H 0.776992 0.647353 -0.500949  
H -0.994667 0.156699 1.900469  
H 0.920095 0.067689 3.288909  
H 2.736272 0.807376 1.150859  
H 3.152372 -0.071153 2.592743  
H 3.904209 -1.596919 1.009553  
H 2.620140 -2.804836 -0.521185

### 20H

17  
E= -650.585148  
C 0.049331 0.018375 -0.097640  
C -0.020201 0.054758 1.400869  
C 1.043660 -0.023749 2.193103  
C 2.474572 -0.097784 1.715129  
C 2.869789 -1.284669 0.870241  
C 2.153266 -1.965296 -0.024592  
P 0.490833 -1.660132 -0.666617  
O 0.382307 -1.914637 -2.127921  
H -0.902246 0.279836 -0.562903  
H 0.810646 0.697748 -0.495402  
H -1.006883 0.102234 1.850160  
H 0.893297 -0.009604 3.267797  
H 2.709954 0.811098 1.141201  
H 3.139713 -0.067790 2.580374  
H 3.901827 -1.601401 1.010778  
H 2.634776 -2.789087 -0.546241  
H -0.346293 -2.469432 0.143746

### 21

16  
E= -649.953472  
C -0.091733 -0.137067 0.012343  
C -0.039540 -0.041719 1.504000  
C 1.096519 0.029719 2.210627  
C 2.429348 -0.105019 1.622347  
C 2.768792 -1.071064 0.758791  
C 1.878736 -2.215148 0.387001  
P 0.429465 -1.774120 -0.694689  
O 0.725531 -1.691332 -2.164071  
H -1.084923 0.088592 -0.376609  
H 0.619353 0.562160 -0.443269  
H -0.987036 0.034555 2.028240  
H 1.036805 0.231286 3.276999  
H 3.186891 0.611005 1.929839  
H 3.764796 -1.065715 0.327381  
H 1.427246 -2.647366 1.285819  
H 2.421981 -3.003819 -0.134984

### 21H

17  
E= -650.596569  
C -0.034899 -0.048254 -0.013394  
C -0.022330 0.026053 1.484161  
C 1.097348 0.049867 2.218127  
C 2.442632 -0.100884 1.659792  
C 2.786290 -1.045105 0.775048  
C 1.878602 -2.154651 0.336804  
P 0.440203 -1.672243 -0.705591  
O 0.621768 -1.711266 -2.179969  
H -1.010773 0.210222 -0.427631



H 0.702763 0.641903 -0.438897  
H -0.980237 0.124145 1.984830  
H 1.017647 0.226491 3.287572  
H 3.207756 0.584476 2.014690  
H 3.801196 -1.059170 0.391977  
H 1.428677 -2.628182 1.217358  
H 2.420596 -2.923456 -0.216574  
H -0.564859 -2.545037 -0.204933

### 22\_planar

14

E= -648.719481

P 0.043675 -0.035944 0.106264  
C 0.336426 0.302428 1.739278  
O 1.046695 -0.732157 -0.719232  
C -0.516736 0.955005 2.657048  
H 1.304326 -0.039073 2.086212  
C -1.774399 1.489401 2.526717  
H -0.088778 1.047202 3.652044  
C -2.650009 1.563128 1.401213  
H -2.175495 1.932775 3.432293  
C -2.497944 1.122317 0.110279  
H -3.597186 2.051594 1.605657  
H -3.348079 1.321614 -0.537170  
C -1.439767 0.453874 -0.545550  
H -1.557032 0.204027 -1.593238

### 22\_nonplanar

14

E= -648.718340

C -0.002736 -0.041173 0.004161  
P 0.054501 0.041729 1.799453

O 1.428873 0.197770 2.378990  
C -1.133326 -0.157664 -0.711432  
C -2.504174 -0.127613 -0.230729  
C -3.021798 0.553087 0.813539  
C -2.351062 1.443715 1.745256  
C -1.083325 1.379850 2.184166  
H 0.963453 -0.070649 -0.491947  
H -1.033326 -0.302682 -1.784758  
H -3.216369 -0.651608 -0.862280  
H -4.101966 0.512993 0.924345  
H -2.973502 2.248738 2.129397  
H -0.707138 2.126254 2.878341

### 22H

15

E= -649.357821

C -0.032422 0.113327 -0.016597  
C -0.002639 0.044172 1.323032  
C 1.164868 -0.133051 2.167236  
C 2.417291 0.343594 1.977878  
C 2.915319 1.154683 0.881855  
C 2.544559 1.094069 -0.406220  
P 1.432559 -0.181084 -1.019513  
H 1.968894 -1.352778 -0.421509  
H -0.958878 0.317267 -0.544173  
H -0.944735 0.123908 1.861392  
H 0.970136 -0.604539 3.126610  
H 3.111866 0.210558 2.802794  
H 3.674255 1.881794 1.163029  
H 2.935351 1.799324 -1.132957  
O 1.227376 -0.225860 -2.489314

**23**

10

E= -571.248424

|   |           |           |           |
|---|-----------|-----------|-----------|
| C | 0.075297  | 0.018310  | 0.043853  |
| C | 0.075443  | 0.017987  | 1.528533  |
| P | 1.706922  | -0.044113 | 0.786003  |
| O | 2.652220  | -1.205581 | 0.785474  |
| C | -0.763984 | 0.002420  | 2.552487  |
| C | -0.764425 | 0.002519  | -0.979865 |
| H | -1.837978 | 0.064432  | 2.404130  |
| H | -0.399581 | -0.076388 | 3.570431  |
| H | -1.838404 | 0.063996  | -0.831179 |
| H | -0.400286 | -0.075903 | -1.997934 |

**23H**

11

E= -571.883213

|   |           |           |           |
|---|-----------|-----------|-----------|
| C | 0.064798  | -0.000126 | 0.096134  |
| C | 0.030428  | -0.034466 | 1.565420  |
| P | 1.664815  | -0.195079 | 0.864385  |
| O | 2.620438  | -1.325420 | 0.860180  |
| C | -0.811248 | -0.046617 | 2.589727  |
| C | -0.727871 | 0.035201  | -0.966032 |
| H | -1.879908 | 0.080458  | 2.444286  |
| H | -0.455992 | -0.191768 | 3.603511  |
| H | -1.802445 | 0.155576  | -0.865434 |
| H | -0.325109 | -0.063207 | -1.967622 |
| H | 2.228650  | 1.097262  | 0.908042  |

**24**

13

E= -610.604929

|   |           |           |           |
|---|-----------|-----------|-----------|
| C | 0.163408  | 0.249188  | -0.088850 |
| C | 0.135610  | 0.142164  | 1.435391  |
| C | 1.643475  | 0.249133  | 1.659979  |
| P | 1.915732  | 0.719782  | -0.071141 |
| O | 2.996919  | 0.248404  | -0.986185 |
| C | 2.412596  | 0.041159  | 2.719321  |
| C | -0.754206 | 0.041277  | -1.022533 |
| H | -0.438102 | 0.936441  | 1.920960  |
| H | -0.248471 | -0.827991 | 1.760416  |
| H | -1.770469 | -0.241946 | -0.766227 |
| H | -0.512683 | 0.136589  | -2.075071 |
| H | 1.991792  | -0.242083 | 3.679215  |
| H | 3.490583  | 0.136441  | 2.655139  |

**24H**

14

E= -611.238820

|   |           |           |           |
|---|-----------|-----------|-----------|
| C | 0.150140  | 0.272036  | -0.045208 |
| C | 0.097397  | 0.189252  | 1.480468  |
| C | 1.610398  | 0.256733  | 1.689251  |
| P | 1.905970  | 0.775591  | -0.037013 |
| O | 2.970835  | 0.276329  | -0.937933 |
| C | 2.393139  | -0.096278 | 2.694629  |
| C | -0.710138 | -0.063810 | -0.991361 |
| H | -0.420846 | 1.045585  | 1.924363  |
| H | -0.361655 | -0.727474 | 1.858836  |
| H | -1.706799 | -0.424673 | -0.754429 |
| H | -0.440735 | 0.000401  | -2.039939 |
| H | 1.986691  | -0.463201 | 3.632639  |
| H | 3.472810  | -0.040691 | 2.608394  |
| H | 1.826783  | 2.193299  | 0.042024  |

**25**

16

E= -649.941567

|   |           |           |           |
|---|-----------|-----------|-----------|
| C | -0.120681 | -0.392808 | 0.117214  |
| C | 0.023136  | -0.025243 | 1.581657  |
| C | 1.514929  | 0.230673  | 1.896630  |
| C | 2.329473  | -0.718792 | 1.049251  |
| P | 1.508074  | -0.810152 | -0.556231 |
| O | 1.702447  | -1.985915 | -1.463685 |
| C | -1.247504 | -0.419991 | -0.590662 |
| H | -0.320147 | -0.879291 | 2.175096  |
| H | -0.598632 | 0.833388  | 1.844503  |
| H | 1.731018  | 0.097848  | 2.958208  |
| H | 1.775243  | 1.262595  | 1.635544  |
| C | 3.428089  | -1.386636 | 1.386656  |
| H | 3.861165  | -1.298214 | 2.378656  |
| H | 3.918500  | -2.050345 | 0.682791  |
| H | -2.202825 | -0.160787 | -0.143399 |
| H | -1.252698 | -0.718606 | -1.633331 |

**25H**

17

E= -650.578559

|   |           |           |           |
|---|-----------|-----------|-----------|
| C | -0.087504 | -0.424907 | 0.122394  |
| C | 0.051629  | -0.048696 | 1.585442  |
| C | 1.539878  | 0.251625  | 1.874446  |
| C | 2.345760  | -0.735237 | 1.066607  |
| P | 1.536188  | -0.921798 | -0.548320 |
| O | 1.686570  | -2.180947 | -1.322507 |
| C | -1.205791 | -0.442556 | -0.591693 |
| H | -0.260308 | -0.903727 | 2.194947  |
| H | -0.592663 | 0.794102  | 1.845067  |

|   |          |          |          |
|---|----------|----------|----------|
| H | 1.771860 | 0.186744 | 2.939357 |
|---|----------|----------|----------|

|   |          |          |          |
|---|----------|----------|----------|
| H | 1.776083 | 1.272071 | 1.549199 |
|---|----------|----------|----------|

|   |          |           |          |
|---|----------|-----------|----------|
| C | 3.379898 | -1.467921 | 1.455778 |
|---|----------|-----------|----------|

|   |          |           |          |
|---|----------|-----------|----------|
| H | 3.796300 | -1.380348 | 2.455414 |
|---|----------|-----------|----------|

|   |          |           |          |
|---|----------|-----------|----------|
| H | 3.834787 | -2.189956 | 0.785368 |
|---|----------|-----------|----------|

|   |           |           |           |
|---|-----------|-----------|-----------|
| H | -2.160250 | -0.149129 | -0.162941 |
|---|-----------|-----------|-----------|

|   |           |           |           |
|---|-----------|-----------|-----------|
| H | -1.210802 | -0.765922 | -1.627555 |
|---|-----------|-----------|-----------|

|   |          |          |           |
|---|----------|----------|-----------|
| H | 1.954782 | 0.242054 | -1.246481 |
|---|----------|----------|-----------|

**26**

14

E= -648.714570

|   |           |           |           |
|---|-----------|-----------|-----------|
| C | -0.015062 | -0.007552 | -0.025238 |
|---|-----------|-----------|-----------|

|   |          |          |          |
|---|----------|----------|----------|
| C | 0.022873 | 0.032017 | 1.307696 |
|---|----------|----------|----------|

|   |          |           |          |
|---|----------|-----------|----------|
| P | 1.526865 | -0.037515 | 2.331761 |
|---|----------|-----------|----------|

|   |          |           |          |
|---|----------|-----------|----------|
| O | 2.658030 | -0.949256 | 1.965254 |
|---|----------|-----------|----------|

|   |           |          |          |
|---|-----------|----------|----------|
| C | -1.109591 | 0.154228 | 2.229456 |
|---|-----------|----------|----------|

|   |           |           |          |
|---|-----------|-----------|----------|
| C | -0.830618 | -0.023312 | 3.532070 |
|---|-----------|-----------|----------|

|   |          |           |          |
|---|----------|-----------|----------|
| C | 0.568454 | -0.315136 | 3.854977 |
|---|----------|-----------|----------|

|   |          |           |          |
|---|----------|-----------|----------|
| C | 1.068961 | -0.696665 | 5.031264 |
|---|----------|-----------|----------|

|   |           |          |          |
|---|-----------|----------|----------|
| H | -2.103298 | 0.382437 | 1.860048 |
|---|-----------|----------|----------|

|   |           |          |          |
|---|-----------|----------|----------|
| H | -1.577574 | 0.047771 | 4.315000 |
|---|-----------|----------|----------|

|   |          |           |          |
|---|----------|-----------|----------|
| H | 0.426306 | -0.848009 | 5.893081 |
|---|----------|-----------|----------|

|   |          |           |          |
|---|----------|-----------|----------|
| H | 2.128452 | -0.887887 | 5.158189 |
|---|----------|-----------|----------|

|   |           |          |           |
|---|-----------|----------|-----------|
| H | -0.957935 | 0.031925 | -0.561962 |
|---|-----------|----------|-----------|

|   |          |           |           |
|---|----------|-----------|-----------|
| H | 0.891027 | -0.101311 | -0.612946 |
|---|----------|-----------|-----------|

**26H**

15

E= -649.352337

|   |           |           |           |
|---|-----------|-----------|-----------|
| C | -0.024006 | -0.025092 | -0.022880 |
|---|-----------|-----------|-----------|

|   |          |          |          |
|---|----------|----------|----------|
| C | 0.013698 | 0.030437 | 1.306670 |
|---|----------|----------|----------|

P 1.528063 -0.089379 2.320542  
O 2.614848 -1.033002 1.958759  
C -1.117361 0.153812 2.229079  
C -0.836823 -0.022569 3.532284  
C 0.562032 -0.314295 3.854094  
C 1.061611 -0.707852 5.023597  
H -2.117832 0.351315 1.860213  
H -1.590233 0.019598 4.311144  
H 0.427052 -0.834740 5.895661  
H 2.116228 -0.932404 5.138788  
H -0.962585 0.039288 -0.565268  
H 0.880295 -0.155056 -0.607060  
H 1.933888 1.266574 2.416764

**27**

19

E= -689.264151

C -0.234518 -0.396928 0.189284  
C -0.086335 -0.044548 1.651838  
C 1.376561 -0.019208 2.115289  
C 2.066792 -1.384530 1.993159  
C 2.145895 -1.878758 0.566774  
P 0.588572 -1.913680 -0.353348  
O 0.681821 -2.140839 -1.831577  
C -0.924182 0.317777 -0.699186  
H -0.552900 0.929068 1.826632  
H -0.638244 -0.773066 2.259293  
H 1.930021 0.720336 1.527068  
H 1.412980 0.305140 3.159084  
H 3.079688 -1.331514 2.402294  
H 1.518151 -2.114963 2.601308  
C 3.261722 -2.287937 -0.035909

H 4.214955 -2.280236 0.485105  
H 3.250942 -2.628324 -1.065613  
H -1.432210 1.233027 -0.408618  
H -0.989254 0.010986 -1.737388

**27H**

20

E= -689.903652

C -0.198467 -0.386119 0.151111  
C -0.103183 -0.078415 1.625993  
C 1.348076 -0.064142 2.132056  
C 2.061666 -1.414817 1.961954  
C 2.157375 -1.840546 0.516748  
P 0.586183 -1.931408 -0.386421  
O 0.655998 -2.185982 -1.849073  
C -0.746190 0.401249 -0.767675  
H -0.579019 0.886355 1.823479  
H -0.667093 -0.830754 2.193560  
H 1.908226 0.708258 1.595020  
H 1.352433 0.209133 3.191041  
H 3.067170 -1.364496 2.389313  
H 1.514000 -2.177163 2.532073  
C 3.283934 -2.086888 -0.142240  
H 4.252047 -2.013767 0.345924  
H 3.264324 -2.363883 -1.191267  
H -1.199447 1.351931 -0.500033  
H -0.749610 0.114254 -1.814192  
H -0.128567 -2.898273 0.372813

**28**

17

E= -688.028830

|                |           |           |           |                |           |           |           |
|----------------|-----------|-----------|-----------|----------------|-----------|-----------|-----------|
| C              | 0.038407  | 0.105220  | -0.030874 | H              | -2.148135 | 0.835361  | 3.960181  |
| C              | 0.001994  | -0.028772 | 1.294222  | H              | -0.256934 | 1.869635  | 4.930797  |
| C              | 1.221697  | -0.031568 | 2.186735  | H              | 2.097872  | 2.750353  | 4.689025  |
| C              | 1.178776  | -0.998164 | 3.341370  | H              | 3.241162  | 1.913638  | 3.484615  |
| C              | 0.103055  | -1.614754 | 3.835109  | H              | -0.909120 | 0.212150  | -0.546825 |
| C              | -1.272329 | -1.477602 | 3.337786  | H              | 0.950597  | 0.218921  | -0.524016 |
| C              | -2.289006 | -2.237120 | 3.759837  | H              | 1.490007  | -1.234979 | 2.964185  |
| P              | -1.588167 | -0.168394 | 2.130253  |                |           |           |           |
| O              | -2.804688 | -0.320955 | 1.269804  | <b>29</b>      |           |           |           |
| H              | 2.106048  | -0.238549 | 1.575652  | 22             |           |           |           |
| H              | 1.371633  | 0.978342  | 2.593467  | E= -728.570293 |           |           |           |
| H              | 2.136026  | -1.185907 | 3.818534  | C              | -0.232694 | -0.300759 | 0.171648  |
| H              | 0.230957  | -2.291002 | 4.676685  | C              | -0.006465 | -0.399417 | 1.664534  |
| H              | -2.134123 | -3.017136 | 4.499326  | C              | 1.347961  | 0.162155  | 2.132934  |
| H              | -3.289341 | -2.108231 | 3.362642  | C              | 2.572649  | -0.722020 | 1.891550  |
| H              | 0.981888  | 0.191493  | -0.562410 | C              | 2.875995  | -1.072901 | 0.425004  |
| H              | -0.874591 | 0.122685  | -0.615658 | C              | 1.964840  | -2.139527 | -0.137552 |
|                |           |           |           | P              | 0.418676  | -1.615741 | -0.918360 |
| <b>28H</b>     |           |           |           | O              | -0.533032 | -2.740656 | -1.218537 |
| 18             |           |           |           | C              | -0.915125 | 0.695305  | -0.389319 |
| E= -688.668260 |           |           |           | H              | -0.803725 | 0.165656  | 2.157278  |
| C              | 0.015013  | 0.149436  | 0.021161  | H              | -0.107445 | -1.439736 | 1.992648  |
| C              | 0.010614  | -0.001745 | 1.340054  | H              | 1.501441  | 1.138609  | 1.658849  |
| P              | 1.586695  | -0.025339 | 2.226200  | H              | 1.278901  | 0.348192  | 3.209450  |
| O              | 2.830903  | 0.141749  | 1.431633  | H              | 3.444465  | -0.204241 | 2.304276  |
| C              | -1.224507 | -0.108874 | 2.201023  | H              | 2.468252  | -1.655083 | 2.456725  |
| C              | -1.189092 | 0.713334  | 3.465401  | H              | 2.822872  | -0.163328 | -0.185398 |
| C              | -0.119918 | 1.288846  | 4.022022  | H              | 3.906023  | -1.434037 | 0.355056  |
| C              | 1.253050  | 1.218203  | 3.505752  | C              | 2.249314  | -3.441773 | -0.115961 |
| C              | 2.251448  | 1.998706  | 3.919905  | H              | 3.185002  | -3.804670 | 0.301271  |
| H              | -2.101969 | 0.175429  | 1.611253  | H              | 1.553106  | -4.173847 | -0.510586 |
| H              | -1.382486 | -1.160238 | 2.480976  | H              | -1.377611 | 1.470402  | 0.216613  |

H -1.049738 0.767995 -1.463343

## 29H

23

E= -729.212075

C -0.263799 -0.370624 0.215329

C -0.034284 -0.452860 1.706682

C 1.320115 0.143043 2.134611

C 2.564676 -0.693510 1.826739

C 2.800390 -1.058867 0.348315

C 1.905883 -2.177177 -0.132561

P 0.273565 -1.769599 -0.809772

O -0.655490 -2.926068 -0.932653

C -0.831349 0.676844 -0.377164

H -0.833412 0.097866 2.210477

H -0.106018 -1.492318 2.045515

H 1.421504 1.131295 1.671236

H 1.290772 0.309041 3.216245

H 3.436050 -0.133778 2.181713

H 2.533731 -1.622243 2.407207

H 2.670745 -0.165443 -0.274842

H 3.840454 -1.374924 0.227539

C 2.216065 -3.467147 -0.043070

H 3.175976 -3.791206 0.351149

H 1.511155 -4.231170 -0.354397

H -1.202383 1.520508 0.199421

H -0.956803 0.731861 -1.454191

H 0.577313 -1.112599 -2.031880

## 30

20

E= -727.335829

C -0.153446 -0.999890 0.558220

C -0.117806 0.108487 1.307385

P 1.512022 0.563264 1.968825

O 2.562632 -0.487544 1.766332

C -1.282696 1.010088 1.421769

C -1.720240 1.647734 2.507568

C -1.152727 1.592228 3.903761

C 0.283880 2.128776 4.055316

C 1.348008 1.127759 3.682591

C 2.247689 0.658944 4.548704

H -1.850461 1.132366 0.502627

H -2.611284 2.257263 2.384299

H -1.804196 2.173915 4.559417

H -1.181618 0.561114 4.273993

H 0.394189 3.039272 3.456784

H 0.449292 2.412880 5.098572

H 2.243375 0.983688 5.585542

H 3.002335 -0.057264 4.243682

H -1.064337 -1.295779 0.046012

H 0.720469 -1.633032 0.454360

## 30H

21

E= -727.973374

C 0.085310 0.206464 -0.036264

C -0.022509 0.154354 1.292210

P 1.503816 -0.130347 2.249179

O 1.878587 -1.538702 2.543377

C -1.336213 0.179575 1.973403

C -1.717175 0.911333 3.022033

C -0.983664 1.949123 3.824359

C 0.497474 2.196283 3.511769

C 1.313572 0.942942 3.694134  
C 1.845694 0.544786 4.844743  
H -2.083842 -0.474268 1.531521  
H -2.746381 0.773167 3.346342  
H -1.532190 2.893678 3.719436  
H -1.071043 1.674678 4.882664  
H 0.601942 2.578894 2.490388  
H 0.868858 2.977717 4.180445  
H 1.767512 1.150883 5.743745  
H 2.363591 -0.405640 4.919554  
H -0.790474 0.298820 -0.672188  
H 1.047939 0.156674 -0.535474  
H 2.438451 0.574458 1.443573

### 31

20

E= -727.328367

C 0.054422 0.252504 0.057867  
C -0.001751 0.001789 1.362685  
P 1.553278 -0.206573 2.298448  
O 1.884857 -1.614943 2.705471  
C -1.299516 -0.143323 2.123172  
C -1.694921 1.020805 3.001680  
C -0.947594 1.994644 3.513754  
C 0.549070 2.202535 3.385392  
C 1.350769 0.952793 3.674880  
C 1.901132 0.667599 4.853388  
H -2.104345 -0.309241 1.398758  
H -1.258746 -1.051701 2.738203  
H -2.754417 1.037512 3.245129  
H -1.460588 2.735848 4.119959  
H 0.786227 2.578041 2.382498

H 0.856976 2.984276 4.083831  
H 1.813964 1.349405 5.694549  
H 2.439037 -0.261117 5.010164  
H -0.850954 0.361228 -0.533575  
H 0.998498 0.351289 -0.467360

### 31H

21

E= -727.970551

C -0.024490 0.253290 0.082762  
C -0.002711 -0.000716 1.387442  
P 1.585316 -0.137684 2.253184  
O 2.073100 -1.501609 2.592560  
C -1.247042 -0.181376 2.225399  
C -1.692875 1.058330 2.971211  
C -0.960727 2.058577 3.453870  
C 0.544959 2.235440 3.423118  
C 1.323659 0.963693 3.667883  
C 1.781298 0.574560 4.852720  
H -2.064077 -0.502735 1.573430  
H -1.094339 -0.998741 2.942072  
H -2.766804 1.118655 3.127206  
H -1.498240 2.864882 3.945329  
H 0.838116 2.677288 2.461010  
H 0.823717 2.966906 4.186003  
H 1.644441 1.184633 5.741367  
H 2.296199 -0.374478 4.961993  
H -0.960289 0.324937 -0.464867  
H 0.887218 0.394427 -0.489611  
H 2.433143 0.615696 1.398001

### 32

18  
E= -726.107527  
C -0.027770 -0.885529 0.409168  
C -0.110802 0.109380 1.304210  
P 1.453561 0.650801 2.036898  
O 2.614804 -0.240997 1.714469  
C -1.365721 0.820729 1.542374  
C -1.729514 1.640197 2.542343  
C -1.071077 2.049856 3.779482  
C 0.116726 1.743559 4.326478  
C 1.223776 0.940977 3.808969  
C 2.209984 0.508999 4.608145  
H -2.118771 0.636097 0.779836  
H -2.734466 2.042714 2.453432  
H -1.701475 2.684944 4.395207  
H 0.299381 2.140761 5.322220  
H 2.191415 0.714833 5.674308  
H 3.041709 -0.062223 4.212689  
H -0.905935 -1.214918 -0.138326  
H 0.912268 -1.389653 0.217756

**32H**

19  
E= -726.748487  
C -0.046915 -1.051794 0.565485  
C -0.089985 0.039977 1.335367  
P 1.498019 0.591336 2.018238  
O 2.648488 -0.291913 1.686698  
C -1.311204 0.820984 1.521356  
C -1.631316 1.705043 2.481587  
C -0.961958 2.113825 3.715097

C 0.192743 1.739399 4.292147  
C 1.245827 0.856150 3.795428  
C 2.146329 0.288346 4.603690  
H -2.066707 0.648446 0.758465  
H -2.608028 2.166277 2.366462  
H -1.558361 2.807125 4.301271  
H 0.387858 2.147140 5.281200  
H 2.106338 0.433915 5.679390  
H 2.934589 -0.337511 4.199657  
H -0.939012 -1.426735 0.072028  
H 0.883153 -1.591253 0.423144  
H 1.572410 1.922373 1.536138

**33**

20  
E= -802.323468  
C -0.069633 -0.066425 0.113225  
C -0.082851 -0.009856 1.499752  
C 1.227667 -0.016007 2.102994  
C 1.781150 0.025455 3.442779  
C 3.125456 -0.009455 3.358296  
C 3.577646 -0.078366 1.920731  
C 2.271891 -0.077307 1.191025  
P 1.576733 -0.125770 -0.381685  
O 2.195448 -0.192983 -1.726455  
C -1.473107 -0.054979 -0.404115  
C -2.270513 0.015488 0.874566  
C -1.460201 0.040558 1.950800  
H -1.722662 -0.953327 -0.980045  
H -3.351902 0.041382 0.893035  
H -1.775262 0.089977 2.984561  
H 4.170543 -0.980634 1.732640



H 3.814888 0.008328 4.191830  
H 1.201140 0.076145 4.354582  
H 4.211698 0.777063 1.661504  
H -1.681966 0.804429 -1.051236

### 33H

21

E= -802.952786

C -0.066305 0.041980 0.109835  
C -0.079700 0.024321 1.462074  
C 1.257221 0.018324 2.078310  
C 1.788003 -0.015270 3.438231  
C 3.130274 -0.025901 3.361494  
C 3.576013 0.002318 1.923522  
C 2.276738 0.032458 1.189781  
P 1.635466 0.102583 -0.499949  
O 2.112043 -0.844404 -1.540943  
C -1.468281 0.026534 -0.401472  
C -2.272309 0.001819 0.871434  
C -1.458730 0.001843 1.941827  
H -1.670638 -0.853463 -1.023770  
H -3.353758 -0.018351 0.891011  
H -1.762744 -0.016264 2.979768  
H 4.173014 -0.881412 1.668229  
H 3.817730 -0.055552 4.196253  
H 1.196114 -0.032909 4.343464  
H 1.796229 1.472397 -0.837843  
H 4.205108 0.875344 1.712883  
H -1.708516 0.903665 -1.013992

### 34

20

E= -802.315422

C -0.078453 0.021962 0.187163  
C -0.141781 0.071956 1.664669  
C 1.181760 0.075197 2.280333  
C 1.715617 0.056134 3.512141  
C 3.212864 -0.003214 3.389903  
C 3.458155 -0.010973 1.905985  
C 2.271166 0.027701 1.280144  
P 1.624929 0.149664 -0.403257  
O 2.141727 -0.719568 -1.509395  
C -1.321576 -0.022433 -0.317335  
C -2.298493 -0.017335 0.826241  
C -1.427714 0.048379 2.050017  
H -1.605611 -0.058951 -1.359639  
H -2.927127 -0.917387 0.822939  
H -1.806867 0.050620 3.062586  
H 4.438454 -0.043391 1.451703  
H 3.624934 -0.899541 3.871509  
H 1.185492 0.057726 4.454493  
H -2.987419 0.835138 0.759940  
H 3.703099 0.853399 3.871264

### 34H

21

E= -802.953455

C -0.072540 0.067615 0.187060  
C -0.140540 0.056878 1.663472  
C 1.182770 0.060186 2.279322  
C 1.718788 0.029076 3.510512  
C 3.216277 0.011802 3.381832  
C 3.455424 0.041858 1.897341  
C 2.268479 0.073479 1.276544

|                |           |           |           |                |           |           |           |
|----------------|-----------|-----------|-----------|----------------|-----------|-----------|-----------|
| P              | 1.637463  | 0.097991  | -0.427566 | H              | -1.649607 | 0.897284  | 2.618473  |
| O              | 2.100275  | -0.908156 | -1.416550 | H              | 4.558093  | -0.058487 | 1.525109  |
| C              | -1.311610 | 0.029915  | -0.321177 | H              | 4.037479  | 0.021613  | 4.093896  |
| C              | -2.293248 | -0.001802 | 0.817760  | H              | 1.499285  | -0.859072 | 4.132277  |
| C              | -1.427498 | 0.021300  | 2.046275  | H              | 1.490191  | 0.899299  | 4.071358  |
| H              | -1.593285 | 0.012778  | -1.365044 | H              | -1.699456 | -0.861240 | 2.654062  |
| H              | -2.920101 | -0.902298 | 0.777336  |                |           |           |           |
| H              | -1.810909 | 0.000218  | 3.056897  | <b>35H</b>     |           |           |           |
| H              | 4.435511  | 0.027999  | 1.440688  | 21             |           |           |           |
| H              | 3.654482  | -0.886146 | 3.836960  | E= -802.951729 |           |           |           |
| H              | 1.192580  | 0.007564  | 4.454675  | C              | -0.032477 | 0.013808  | 0.157492  |
| H              | 1.823588  | 1.442277  | -0.834771 | C              | -0.033895 | 0.006881  | 1.513000  |
| H              | -2.983135 | 0.851257  | 0.778390  | C              | 1.287160  | 0.007958  | 2.123402  |
| H              | 3.687194  | 0.867638  | 3.882809  | C              | 1.824223  | -0.007826 | 3.518694  |
|                |           |           |           | C              | 3.313524  | -0.004298 | 3.289460  |
| <b>35</b>      |           |           |           | C              | 3.581213  | 0.011098  | 1.970832  |
| 20             |           |           |           | C              | 2.318502  | 0.015424  | 1.243739  |
| E= -802.317754 |           |           |           | P              | 1.676290  | 0.098166  | -0.453824 |
| C              | -0.034941 | -0.095126 | 0.165320  | O              | 2.165964  | -0.818845 | -1.513027 |
| C              | -0.034914 | -0.055852 | 1.537003  | C              | -1.404526 | 0.005850  | -0.332932 |
| C              | 1.270585  | -0.054838 | 2.140685  | C              | -2.235174 | -0.011337 | 0.725431  |
| C              | 1.818439  | 0.001952  | 3.532763  | C              | -1.444497 | -0.012273 | 2.008369  |
| C              | 3.308394  | 0.000626  | 3.295653  | H              | -1.693977 | 0.000980  | -1.374539 |
| C              | 3.577510  | -0.043004 | 1.979637  | H              | -3.315692 | -0.031651 | 0.690739  |
| C              | 2.315729  | -0.093484 | 1.252244  | H              | -1.675900 | 0.856551  | 2.636011  |
| P              | 1.642722  | 0.060338  | -0.377829 | H              | 4.562068  | 0.007330  | 1.516200  |
| O              | 2.231417  | -0.445555 | -1.650787 | H              | 4.040311  | -0.021972 | 4.089832  |
| C              | -1.406535 | -0.047623 | -0.324863 | H              | 1.498157  | -0.897885 | 4.070342  |
| C              | -2.234841 | -0.004747 | 0.732589  | H              | 1.810548  | 1.480756  | -0.745701 |
| C              | -1.450422 | -0.000939 | 2.021301  | H              | 1.494198  | 0.861312  | 4.100131  |
| H              | -1.695475 | -0.064289 | -1.366294 | H              | -1.650864 | -0.902765 | 2.614360  |
| H              | -3.315303 | 0.014061  | 0.694054  |                |           |           |           |

**36**

22

E= -878.597681

|   |           |           |           |
|---|-----------|-----------|-----------|
| C | 0.042927  | -0.016692 | -0.087968 |
| C | 0.012157  | -0.018964 | 1.315938  |
| C | 1.352808  | -0.018426 | 1.940901  |
| C | 2.408262  | -0.015757 | 1.014665  |
| P | 1.746428  | 0.165281  | -0.654080 |
| O | 2.283983  | -0.627221 | -1.806547 |
| C | -1.126543 | -0.052896 | -0.835465 |
| C | 3.732720  | -0.050975 | 1.429747  |
| C | -2.346123 | -0.105639 | -0.171955 |
| H | -1.086174 | -0.050053 | -1.918727 |
| H | -3.268280 | -0.149193 | -0.739376 |
| C | -2.386713 | -0.098667 | 1.220252  |
| C | -1.215700 | -0.054071 | 1.967655  |
| H | -3.343317 | -0.131929 | 1.728975  |
| H | -1.265995 | -0.056728 | 3.050648  |
| C | 4.008729  | -0.103128 | 2.790446  |
| H | 4.536424  | -0.047832 | 0.702323  |
| H | 5.036259  | -0.145916 | 3.131897  |
| C | 2.968544  | -0.096545 | 3.716678  |
| C | 1.643159  | -0.052926 | 3.300353  |
| H | 3.194005  | -0.129332 | 4.776437  |
| H | 0.846044  | -0.055869 | 4.035206  |

**36H**

23

E= -879.235427

|   |          |           |           |
|---|----------|-----------|-----------|
| C | 0.043507 | 0.018514  | -0.081936 |
| C | 0.009040 | -0.022569 | 1.318244  |
| C | 1.353056 | -0.022044 | 1.944777  |

|   |           |           |           |
|---|-----------|-----------|-----------|
| C | 2.403258  | 0.019436  | 1.018097  |
| P | 1.756010  | 0.120238  | -0.674579 |
| O | 2.247452  | -0.803776 | -1.728034 |
| C | -1.122864 | -0.014278 | -0.829776 |
| C | 3.725984  | -0.012379 | 1.430588  |
| H | 1.905200  | 1.493908  | -0.995762 |
| C | -2.345964 | -0.077690 | -0.169864 |
| H | -1.082525 | 0.000699  | -1.913228 |
| H | -3.267443 | -0.109453 | -0.739128 |
| C | -2.387560 | -0.104695 | 1.220489  |
| C | -1.216747 | -0.078369 | 1.970514  |
| H | -3.344835 | -0.153039 | 1.727020  |
| H | -1.267908 | -0.107679 | 3.052983  |
| C | 4.007013  | -0.075184 | 2.791673  |
| H | 4.529846  | 0.002896  | 0.703064  |
| H | 5.035509  | -0.106180 | 3.131421  |
| C | 2.968912  | -0.102569 | 3.717490  |
| C | 1.641662  | -0.077238 | 3.303003  |
| H | 3.196489  | -0.150435 | 4.776359  |
| H | 0.845518  | -0.106839 | 4.038185  |

**37**

23

E= -841.651529

|   |           |           |           |
|---|-----------|-----------|-----------|
| P | -0.017480 | -0.418811 | 0.149283  |
| O | -0.009732 | 0.261357  | 1.489088  |
| C | 1.347314  | -0.131445 | -0.954365 |
| C | 2.794448  | -0.009232 | -0.575649 |
| C | 3.475500  | 0.132527  | -1.902455 |
| C | 2.563346  | 0.084808  | -2.885509 |
| C | 1.229819  | -0.083421 | -2.304560 |
| C | -1.393080 | -0.128136 | -0.939930 |

C -2.835773 -0.001762 -0.545959  
C -3.530357 0.142272 -1.865485  
C -2.628769 0.092030 -2.858114  
C -0.034273 -0.161914 -3.103850  
H 3.147995 -0.889651 -0.026188  
H 4.542518 0.263989 -2.019651  
H 2.758460 0.168211 -3.947673  
H -3.186072 -0.881369 0.006890  
H -4.598172 0.276796 -1.971411  
H -3.002659 0.861376 0.109049  
H 2.970757 0.853665 0.077221  
H -0.037229 0.637183 -3.855814  
H -0.038520 -1.097612 -3.681115  
C -1.289680 -0.080146 -2.291279  
H -2.834857 0.176146 -3.918149

### 37H

24

E= -842.289856

P -0.071487 -0.191562 0.166401  
O -0.062632 0.795521 1.282392  
C 1.306180 -0.146403 -0.971149  
C 2.757516 -0.128753 -0.586521  
C 3.453241 -0.008496 -1.907072  
C 2.545111 0.046652 -2.891674  
C 1.199124 -0.030879 -2.312534  
C -1.440352 -0.111929 -0.979836  
C -2.893265 -0.058069 -0.604633  
C -3.577220 0.079556 -1.929628  
C -2.661652 0.111756 -2.908337  
C -0.058253 0.023926 -3.120090  
H 3.055892 -1.035925 -0.046386

H 4.528302 0.028915 -2.019344  
H 2.748571 0.139385 -3.951416  
H -3.217491 -0.957950 -0.067147  
H -4.650262 0.143885 -2.048820  
H -3.102635 0.791066 0.056921  
H 2.983507 0.715482 0.075884  
H -0.045025 0.927366 -3.743264  
H -0.066494 -0.813650 -3.830259  
C -1.321787 0.000715 -2.320499  
H -2.855836 0.209292 -3.969386  
H -0.089754 -1.533925 0.629612

### 38

23

E= -841.642753

P -0.051043 0.969316 -0.012138  
O -0.055155 0.712802 1.463776  
C 1.304992 0.329692 -0.988577  
C 2.528922 -0.061418 -0.585892  
C 3.296324 -0.554484 -1.774781  
C 2.329408 -0.377907 -2.908145  
C 1.182038 0.144604 -2.452860  
C -1.431573 0.382052 -0.987135  
C -2.669201 0.038234 -0.583152  
C -3.456017 -0.425365 -1.771192  
C -2.484297 -0.286040 -2.905483  
C -0.061268 0.524471 -3.209759  
H 3.598716 -1.601659 -1.648194  
H 2.545191 -0.644608 -3.934473  
H -3.039092 0.061014 0.432577  
H -4.358722 0.180982 -1.920894  
H 2.900611 -0.052841 0.429398

H -0.040705 1.610467 -3.377865  
H -0.070784 0.052495 -4.194083  
C -1.317269 0.192163 -2.451479  
H 4.221298 0.017127 -1.925209  
H -2.711249 -0.544087 -3.931618  
H -3.797983 -1.460226 -1.643943

### 38H

24

E= -842.280400

P -0.138808 -0.760410 0.134367  
O -0.133690 -0.221765 1.518732  
C 1.243938 -0.343969 -0.942176  
C 2.454289 0.115803 -0.589714  
C 3.241917 0.414523 -1.829188  
C 2.290804 0.067868 -2.935953  
C 1.134611 -0.372087 -2.418340  
C -1.481535 -0.269669 -0.961392  
C -2.669893 0.255916 -0.626406  
C -3.421764 0.597059 -1.877017  
C -2.475172 0.198626 -2.969956  
C -0.117453 -0.827826 -3.118148  
H 4.166550 -0.174968 -1.871699  
H 2.520638 0.174925 -3.987909  
H -3.028397 0.433623 0.378407  
H -3.668197 1.665722 -1.913567  
H 2.807261 0.274344 0.420252  
H -0.101934 -0.529236 -4.168040  
H -0.147759 -1.926278 -3.100053  
C -1.352360 -0.303914 -2.435883  
H -0.176872 -2.177570 0.051485  
H 3.546618 1.468185 -1.861732

H -2.683322 0.318059 -4.025095  
H -4.376537 0.058936 -1.933259

### 39

23

E= -841.644989

P -0.061638 -0.439498 0.127354  
O -0.068480 0.244810 1.463783  
C 1.319001 -0.134632 -0.969104  
C 2.734310 -0.002855 -0.594604  
C 3.467806 0.139301 -1.705527  
C 2.571000 0.103275 -2.908394  
C 1.202488 -0.080175 -2.315964  
C -1.436139 -0.143892 -0.979355  
C -2.855262 -0.023624 -0.615669  
C -3.581539 0.112016 -1.732361  
C -2.675320 0.083515 -2.928374  
C -0.050379 -0.166109 -3.128042  
H 4.539769 0.270138 -1.757296  
H 2.828742 -0.715875 -3.592316  
H -3.221588 -0.029404 0.401919  
H -4.654043 0.234776 -1.792098  
H 3.092799 -0.006472 0.425775  
H -0.049956 0.630003 -3.884458  
H -0.045576 -1.102810 -3.706218  
C -1.309808 -0.088119 -2.325281  
H -2.739727 1.008513 -3.515277  
H 2.631826 1.028947 -3.494624  
H -2.920140 -0.738327 -3.613728

### 39H

24

E= -842.283483  
P -0.054554 -0.174011 0.190625  
O -0.061957 0.805372 1.310311  
C 1.328743 -0.101288 -0.952668  
C 2.753677 -0.059999 -0.588001  
C 3.489354 0.027564 -1.703157  
C 2.582582 0.060678 -2.897970  
C 1.208873 -0.025706 -2.293833  
C -1.432831 -0.114784 -0.959501  
C -2.859930 -0.088109 -0.601974  
C -3.590856 -0.008084 -1.720789  
C -2.678541 0.034130 -2.911068  
C -0.047172 -0.021661 -3.103096  
H 4.567572 0.078660 -1.762911  
H 2.772137 -0.771659 -3.587453  
H -3.232520 -0.118115 0.413178  
H -4.669227 0.032131 -1.785881  
H 3.121445 -0.086530 0.429005  
H -0.049891 0.856960 -3.762153  
H -0.041276 -0.884717 -3.783695  
C -1.307042 -0.038196 -2.300061  
H -2.807809 0.954676 -3.494152  
H 2.705342 0.982659 -3.480208  
H -2.856061 -0.800311 -3.601203  
H -0.049196 -1.523942 0.628928

**40**

25

E= -917.914457  
C 0.026230 0.320493 0.107070  
C 0.019317 0.237745 1.506186  
C 1.272859 0.541499 2.298471

C 2.536160 -0.070759 1.732294  
C 2.795100 -0.018905 0.355820  
P 1.569617 0.750291 -0.719911  
O 1.662030 0.432232 -2.182547  
C -1.128860 0.073405 -0.633162  
C -1.167388 -0.110794 2.141662  
H 1.403743 1.632187 2.329735  
H 1.140296 0.217955 3.332604  
C 3.474170 -0.679738 2.558649  
C 3.968831 -0.551451 -0.175195  
C 4.895618 -1.147930 0.666826  
H 4.136282 -0.505756 -1.245514  
H 5.806880 -1.568753 0.258393  
C 4.646202 -1.211103 2.033033  
H 5.365532 -1.681180 2.693917  
H 3.285272 -0.741097 3.625561  
C -2.304606 -0.265354 0.019972  
H -1.089832 0.134842 -1.715017  
H -3.203833 -0.464254 -0.551112  
C -2.321522 -0.357027 1.407066  
H -3.237079 -0.626706 1.921075  
H -1.189093 -0.192647 3.223594

**40H**

26

E= -918.553053

C 0.027284 0.272033 0.063451  
C 0.027080 0.254715 1.462793  
C 1.284815 0.601201 2.232206  
C 2.538033 -0.052150 1.687665  
C 2.786991 -0.065237 0.310601  
P 1.564458 0.663816 -0.804861

O 1.645321 0.275510 -2.237687  
C -1.117323 -0.049889 -0.658745  
C -1.151912 -0.077759 2.121659  
H 1.420291 1.691432 2.207213  
H 1.157980 0.333247 3.282816  
C 3.469310 -0.642520 2.535521  
C 3.929760 -0.666703 -0.206743  
C 4.851559 -1.248543 0.653300  
H 4.079384 -0.683663 -1.280807  
H 5.743551 -1.718745 0.256469  
C 4.618968 -1.232504 2.022901  
H 5.332213 -1.691168 2.698465  
H 3.291262 -0.648212 3.606009  
C -2.287364 -0.376083 0.013958  
H -1.076220 -0.053588 -1.742528  
H -3.182186 -0.627917 -0.542897  
C -2.301190 -0.386786 1.403149  
H -3.210301 -0.647185 1.933420  
H -1.170653 -0.102926 3.206414  
H 1.712194 2.054883 -0.556208

#### 41

24

E= -879.735887

C -0.034658 -0.007560 0.087311  
C -0.043143 -0.042291 1.453197  
C 1.369654 -0.009736 1.960815  
C 2.180732 0.064579 0.706686  
C 1.364903 0.055670 -0.355970  
P -1.428074 -0.282315 2.546315  
O -1.146147 -0.017366 3.998366  
C -1.136344 -0.025030 -0.856005

C -2.421665 0.334893 -0.672183  
C -3.070696 0.842595 0.521490  
C -2.725895 0.709072 1.836883  
C -3.735887 1.419948 2.690901  
C -4.689666 1.988165 1.689116  
C -4.301707 1.642207 0.454326  
H 3.260160 0.126783 0.690267  
H -5.547525 2.592723 1.949680  
H 1.602620 -0.898813 2.558844  
H 1.661592 0.106618 -1.396310  
H -4.789828 1.912833 -0.473802  
H -3.058726 0.308254 -1.552379  
H -0.856595 -0.308394 -1.867314  
H -4.224225 0.732951 3.392283  
H -3.259888 2.189390 3.310793  
H 1.532683 0.847155 2.625656

#### 41H

25

E= -880.371499

C 0.013891 -0.080775 0.039998  
C 0.024143 0.061960 1.505159  
C 1.319354 0.072907 1.919729  
C 2.226560 -0.093635 0.736491  
C 1.270862 -0.183942 -0.410535  
C -1.196945 0.158542 2.284904  
C -1.414039 -0.250415 3.550846  
C -0.482730 -0.892901 4.460936  
C 0.869628 -0.774274 4.542240  
C 1.388131 -1.673127 5.625768  
C 0.143863 -2.307094 6.161556

C -0.921701 -1.843349 5.495890  
P 1.899767 0.336146 3.590949  
O 3.366510 0.176168 3.790786  
H 0.136358 -3.036451 6.960079  
H 1.576570 -0.323231 -1.438542  
H 1.936387 -1.110312 6.390871  
H -1.955223 -2.124645 5.655307  
H -0.890308 -0.118421 -0.554743  
H -2.059884 0.530240 1.738534  
H -2.433818 -0.174174 3.919056  
H 2.922828 0.747997 0.638543  
H 2.853039 -0.988939 0.830860  
H 2.098168 -2.411021 5.232947  
H 1.391289 1.622618 3.919350

**42**

24

E= -879.727597

C 0.030264 -0.038188 0.004463  
C 0.044784 -0.073942 1.486211  
C 1.315340 0.027925 1.925067  
C 2.240795 0.124045 0.754281  
C 1.307644 0.086475 -0.412322  
P -1.363622 -0.030895 2.578885  
C -2.613574 -1.089355 1.874129  
C -3.477065 -1.802628 2.624400  
C -4.493037 -2.448094 1.736920  
C -4.094337 -1.976945 0.375965  
C -2.997112 -1.194571 0.446231  
C -2.347321 -0.615904 -0.725736  
C -1.105155 -0.141422 -0.906998  
O -1.069105 -0.246687 4.032341

H -5.513171 -2.142155 2.003207  
H 2.835003 1.046625 0.785005  
H -3.450462 -1.886175 3.702209  
H -4.608283 -2.252736 -0.535764  
H 1.626880 0.128945 -1.445634  
H -0.865190 0.173775 -1.919095  
H -2.977903 -0.633240 -1.610800  
H 1.620545 0.050789 2.962220  
H -4.470271 -3.542387 1.817701  
H 2.960985 -0.703847 0.733279

**42H**

25

E= -880.365878

C 0.016481 0.197284 0.164173  
C 0.004938 0.252182 1.644126  
C 1.181268 -0.184517 2.120712  
C 2.072136 -0.558532 0.978267  
C 1.229055 -0.255529 -0.218360  
P -1.288174 0.915870 2.696437  
C -2.814540 0.272811 2.005982  
C -3.838672 -0.147932 2.764733  
C -4.994292 -0.506961 1.884752  
C -4.476138 -0.213953 0.513567  
C -3.199971 0.220971 0.576920  
C -2.390095 0.540333 -0.597394  
C -1.058886 0.530446 -0.768227  
O -1.102249 0.702503 4.156224  
H -5.884862 0.084534 2.132713  
H 3.004957 0.019473 0.992338  
H -3.837465 -0.200976 3.845077  
H -5.044921 -0.362875 -0.395095



H 1.547977 -0.410918 -1.240857  
H -0.707911 0.731572 -1.776969  
H -2.981427 0.748323 -1.485234  
H 1.451899 -0.239547 3.166507  
H -5.283253 -1.559428 1.999346  
H 2.365331 -1.615308 1.018211  
H -1.331671 2.272440 2.280710

### 43

24

E= -879.734811

C -0.091513 -0.021738 0.044991  
C -0.074528 -0.046551 1.412185  
C 1.309822 -0.004086 1.884970  
C 2.136636 0.042119 0.830571  
C 1.339394 0.021399 -0.433730  
P -1.458391 -0.295431 2.521883  
O -1.164502 -0.029820 3.970967  
C -1.186623 -0.020817 -0.887280  
C -2.476332 0.342831 -0.692081  
C -3.112428 0.829860 0.502275  
C -2.762583 0.710881 1.818956  
C -3.737911 1.418543 2.649621  
C -4.677691 1.962540 1.862892  
C -4.386263 1.635482 0.433829  
H -5.524208 2.551794 2.187562  
H 1.579063 -0.007442 2.932394  
H 1.529712 0.900427 -1.061497  
H -4.264490 2.534227 -0.183150  
H -3.109474 0.347766 -1.575989  
H -0.911239 -0.272179 -1.908637  
H -3.670876 1.472159 3.727685

H 3.216416 0.088875 0.863252  
H -5.192910 1.047769 -0.023845  
H 1.569503 -0.859494 -1.047268

### 43H

25

E= -880.371493

C 0.072834 -0.014339 0.069004  
C 0.086829 -0.103300 1.427982  
C 1.375580 -0.631264 1.875900  
C 2.160070 -0.840452 0.808001  
C 1.424440 -0.456257 -0.436506  
P -1.213649 0.443710 2.538129  
C -2.688263 -0.264919 1.799067  
C -3.745784 -0.929581 2.560715  
C -4.753386 -1.243140 1.732454  
C -4.418151 -0.796521 0.344765  
C -3.040852 -0.195701 0.485355  
C -2.316808 0.312990 -0.652178  
C -0.976975 0.391010 -0.831371  
O -1.003000 0.131349 3.977332  
H -3.689567 -1.108498 3.625765  
H -5.130508 -0.047948 -0.026019  
H 1.339513 -1.286888 -1.147473  
H -0.640700 0.706945 -1.815882  
H -2.932909 0.573481 -1.509342  
H 1.621012 -0.799177 2.915646  
H -5.679011 -1.732732 2.002047  
H 3.173618 -1.216986 0.818311  
H -4.428512 -1.622608 -0.376397  
H 1.924705 0.362682 -0.969731  
H -1.334899 1.825774 2.232814

**44**

26  
 E= -955.982548

|   |           |           |           |
|---|-----------|-----------|-----------|
| C | -0.006510 | -0.013502 | -0.016506 |
| C | -0.010513 | -0.020147 | 1.384268  |
| C | 1.229523  | -0.005357 | 2.047358  |
| C | 2.417198  | -0.024553 | 1.314437  |
| C | 2.396928  | -0.048872 | -0.071124 |
| C | 1.176254  | -0.037001 | -0.736212 |
| P | 1.333048  | 0.128638  | 3.856095  |
| C | -1.317380 | -0.034427 | 2.053451  |
| C | -1.709195 | -0.641248 | 3.183101  |
| C | -0.958782 | -1.488774 | 4.118243  |
| C | 0.392062  | -1.302373 | 4.461862  |
| C | 1.021111  | -2.186741 | 5.339530  |
| C | 0.328516  | -3.252324 | 5.892367  |
| C | -1.014307 | -3.429630 | 5.579451  |
| C | -1.646929 | -2.554097 | 4.713027  |
| H | -2.101126 | 0.465036  | 1.490318  |
| H | -2.768473 | -0.568512 | 3.414359  |
| H | 2.061691  | -2.026415 | 5.600940  |
| H | 0.827087  | -3.930323 | 6.574891  |
| H | -1.571082 | -4.251163 | 6.015423  |
| H | -2.695125 | -2.699226 | 4.473453  |
| H | 3.366376  | -0.005786 | 1.839372  |
| H | 3.325739  | -0.060536 | -0.629038 |
| H | 1.146517  | -0.042284 | -1.819759 |
| H | -0.955271 | -0.004633 | -0.542763 |
| O | 0.876573  | 1.452862  | 4.409110  |

**44H**

E= -956.634561

|   |           |           |           |
|---|-----------|-----------|-----------|
| C | -0.003142 | -0.006620 | 0.012454  |
| C | 0.012121  | -0.013245 | 1.412454  |
| C | 1.258283  | 0.008272  | 2.056651  |
| C | 2.440115  | 0.075214  | 1.321744  |
| C | 2.399644  | 0.115212  | -0.063579 |
| C | 1.172607  | 0.067685  | -0.716706 |
| C | -1.281633 | -0.054901 | 2.109770  |
| C | -1.673442 | 0.539352  | 3.248264  |
| C | -0.934332 | 1.422236  | 4.162604  |
| C | -1.638089 | 2.473096  | 4.763187  |
| C | -1.004213 | 3.369258  | 5.608573  |
| C | 0.349337  | 3.224903  | 5.894085  |
| C | 1.058124  | 2.171273  | 5.337452  |
| C | 0.423948  | 1.273705  | 4.481014  |
| P | 1.400259  | -0.112589 | 3.854600  |
| H | 0.587688  | -1.233458 | 4.160011  |
| O | 2.799885  | -0.156840 | 4.359373  |
| H | -2.725537 | 0.430202  | 3.499271  |
| H | -2.058533 | -0.581440 | 1.561128  |
| H | 3.384022  | 0.079002  | 1.855847  |
| H | 3.320464  | 0.165580  | -0.632630 |
| H | 1.132362  | 0.084150  | -1.799876 |
| H | -0.956444 | -0.043629 | -0.504350 |
| H | 2.106565  | 2.016516  | 5.567808  |
| H | 0.844747  | 3.920488  | 6.561164  |
| H | -1.569368 | 4.181852  | 6.050656  |
| H | -2.694345 | 2.592236  | 4.545539  |

**8A**

|    |             |           |           |            |             |           |           |
|----|-------------|-----------|-----------|------------|-------------|-----------|-----------|
| E= | -885.844765 |           |           | H          | -3.334893   | -6.050290 | 4.291193  |
| C  | 0.084153    | 0.152720  | -0.194453 | H          | -3.808024   | -5.070178 | 2.898094  |
| C  | 0.038050    | 0.069034  | 1.334676  | H          | -2.253464   | -5.927093 | 2.898165  |
| C  | 1.473736    | 0.073882  | 1.888757  |            |             |           |           |
| C  | -0.661730   | -1.200576 | 1.770116  | <b>8AH</b> |             |           |           |
| P  | -0.938685   | -1.702867 | 3.420091  | 35         |             |           |           |
| O  | -0.574233   | -1.041501 | 4.702156  | E:         | -886.477383 |           |           |
| C  | -1.214221   | -2.203147 | 1.021082  | C          | -0.027003   | -0.024222 | 0.013261  |
| C  | -1.817648   | -3.297936 | 1.757375  | C          | 0.007989    | 0.015323  | 1.543735  |
| C  | -1.769433   | -3.210265 | 3.121720  | C          | 1.469953    | 0.083400  | 2.026156  |
| C  | -2.292572   | -4.159379 | 4.178468  | C          | -0.649198   | -1.259060 | 2.102880  |
| C  | -3.320926   | -3.425261 | 5.056977  | C          | -0.721671   | 1.228633  | 2.071556  |
| C  | -2.960510   | -5.371170 | 3.520604  | C          | -1.231289   | 2.274191  | 1.408895  |
| C  | -1.122746   | -4.636877 | 5.056948  | C          | -1.850228   | 3.335632  | 2.235512  |
| C  | -0.724445   | 1.285497  | 1.888787  | C          | -1.835760   | 3.139571  | 3.559668  |
| H  | -1.210590   | -2.196698 | -0.061520 | C          | -2.334663   | 4.032331  | 4.671973  |
| H  | -2.276369   | -4.130324 | 1.238927  | C          | -3.265190   | 3.226114  | 5.595427  |
| H  | -0.232487   | 2.213080  | 1.580817  | P          | -1.102996   | 1.492989  | 3.834644  |
| H  | -1.752403   | 1.300794  | 1.516415  | O          | -0.065950   | 1.279863  | 4.884401  |
| H  | -0.754398   | 1.266391  | 2.981694  | C          | -1.117910   | 4.520454  | 5.481889  |
| H  | 0.590930    | 1.072273  | -0.499041 | C          | -3.095091   | 5.237081  | 4.110358  |
| H  | 0.632759    | -0.690661 | -0.623564 | H          | -1.206930   | 2.370501  | 0.328701  |
| H  | -0.921877   | 0.166119  | -0.623544 | H          | -2.280867   | 4.211811  | 1.762709  |
| H  | 1.995344    | 0.985102  | 1.580728  | H          | 2.015422    | -0.804232 | 1.690895  |
| H  | 1.473591    | 0.038414  | 2.981666  | H          | 1.967695    | 0.967784  | 1.619369  |
| H  | 2.035532    | -0.787132 | 1.516424  | H          | 1.523490    | 0.135268  | 3.116141  |
| H  | -3.711468   | -4.098785 | 5.825821  | H          | 0.506795    | -0.907604 | -0.347529 |
| H  | -2.867125   | -2.566699 | 5.559614  | H          | -1.053724   | -0.072365 | -0.361541 |
| H  | -4.160027   | -3.067323 | 4.454164  | H          | 0.458403    | 0.855284  | -0.419410 |
| H  | -1.483650   | -5.326785 | 5.825748  | H          | -0.140017   | -2.144861 | 1.712728  |
| H  | -0.372033   | -5.155143 | 4.454102  | H          | -0.582018   | -1.295103 | 3.194243  |
| H  | -0.639178   | -3.794752 | 5.559638  | H          | -1.703607   | -1.317329 | 1.817609  |

|                          |           |           |           |   |           |           |           |
|--------------------------|-----------|-----------|-----------|---|-----------|-----------|-----------|
| H                        | -1.451615 | 5.139695  | 6.320342  | C | -2.044138 | -2.827508 | 0.389828  |
| H                        | -0.543313 | 3.679014  | 5.876133  | C | -3.737965 | -0.125806 | -0.308917 |
| H                        | -0.453947 | 5.120137  | 4.853485  | C | -3.366767 | 1.077042  | -1.070694 |
| H                        | -3.647085 | 3.867713  | 6.394576  | C | -0.564685 | 1.726468  | -2.560122 |
| H                        | -4.118944 | 2.824103  | 5.042217  | C | -2.294054 | 3.236608  | -2.369043 |
| H                        | -2.733973 | 2.394164  | 6.067176  | C | 0.867430  | -1.805915 | -2.428838 |
| H                        | -3.445652 | 5.869822  | 4.930247  | C | 3.071547  | -1.509993 | -3.055998 |
| H                        | -2.454038 | 5.849980  | 3.470233  | C | -2.196340 | -1.731236 | 2.385528  |
| H                        | -3.966670 | 4.923166  | 3.528328  | C | -4.121566 | -2.296563 | 1.228745  |
| H                        | -2.266551 | 0.691347  | 3.993114  | H | -4.083594 | 1.565164  | -1.726025 |
| <b>{8A}</b> <sub>2</sub> |           |           |           | H | -4.743198 | -0.534765 | -0.371201 |
| 68                       |           |           |           | H | 3.796747  | 1.891801  | 0.393023  |
| E= -1771.794547          |           |           |           | H | 3.965238  | 0.406334  | -1.699198 |
| C                        | 1.155806  | 2.575326  | 2.238378  | H | -4.192410 | -3.253794 | 1.753952  |
| C                        | 1.892531  | 1.391894  | 2.367707  | H | -4.716688 | -1.565048 | 1.782891  |
| C                        | 1.203447  | 0.486104  | 3.183004  | H | -4.576947 | -2.428333 | 0.242579  |
| C                        | 3.156399  | 1.685250  | 2.893614  | H | -2.312399 | -2.640476 | 2.983511  |
| C                        | 2.101674  | 0.797355  | 1.117594  | H | -1.123578 | -1.549268 | 2.267489  |
| C                        | 3.086709  | 1.081821  | 0.248847  | H | -2.637592 | -0.900467 | 2.943280  |
| C                        | 3.207782  | 0.201617  | -0.948070 | H | -2.124871 | -3.824762 | 0.833788  |
| C                        | 2.347143  | -0.823650 | -1.020946 | H | -2.387330 | -2.887240 | -0.646936 |
| C                        | 2.200780  | -1.811584 | -2.002050 | H | -0.987870 | -2.542710 | 0.399083  |
| C                        | 2.513231  | -3.040088 | -1.407784 | H | -1.767823 | 3.965357  | -2.992778 |
| P                        | 1.294429  | -0.683493 | 0.442426  | H | -2.928456 | 2.636103  | -3.027692 |
| O                        | 1.132523  | -1.844739 | 1.351518  | H | -2.943743 | 3.787774  | -1.683401 |
| O                        | -0.084689 | -0.218120 | -0.265819 | H | -0.015867 | 3.948923  | -1.410078 |
| P                        | -1.405310 | 0.530410  | 0.454015  | H | -1.141149 | 3.722091  | -0.061198 |
| C                        | -2.087349 | 1.483422  | -0.922648 | H | 0.165431  | 2.562130  | -0.329086 |
| C                        | -1.383382 | 2.433877  | -1.671691 | H | 0.057531  | 2.403971  | -3.153173 |
| C                        | -0.567234 | 3.200999  | -0.831795 | H | 0.091853  | 1.051525  | -2.002774 |
| C                        | -2.748987 | -0.682442 | 0.425882  | H | -1.162080 | 1.121139  | -3.247835 |
| C                        | -2.784510 | -1.894515 | 1.125609  | H | 0.692147  | -2.603249 | -3.157597 |

|   |          |           |           |   |           |           |           |
|---|----------|-----------|-----------|---|-----------|-----------|-----------|
| H | 0.189106 | -1.956957 | -1.584897 | C | -1.347368 | 1.387816  | -2.283464 |
| H | 0.605515 | -0.851410 | -2.891885 | C | -1.456608 | -1.668928 | -2.060396 |
| H | 2.333975 | -3.870343 | -2.097498 | C | 4.323308  | 0.071676  | 3.550136  |
| H | 3.561012 | -3.074347 | -1.096844 | C | 4.914344  | -1.669052 | 1.066774  |
| H | 1.897562 | -3.194040 | -0.516790 | C | 5.024087  | 1.387692  | 0.843949  |
| H | 2.994154 | -2.261966 | -3.846790 | H | -2.170472 | 1.392558  | -3.004444 |
| H | 2.833964 | -0.537394 | -3.496931 | H | -1.360964 | 2.340508  | -1.746735 |
| H | 4.112743 | -1.488423 | -2.720961 | H | -0.410060 | 1.330544  | -2.844810 |
| H | 3.062781 | 2.152247  | 3.878766  | H | -3.942931 | 0.056731  | -0.718950 |
| H | 3.755718 | 0.777599  | 3.004527  | H | -3.147147 | -0.762690 | 0.628067  |
| H | 3.708139 | 2.378717  | 2.251703  | H | -3.083611 | 1.003041  | 0.499721  |
| H | 1.007464 | 3.027465  | 3.224309  | H | -2.281946 | -1.719591 | -2.777067 |
| H | 1.664417 | 3.306745  | 1.604592  | H | -0.520714 | -1.760233 | -2.619578 |
| H | 0.172064 | 2.375715  | 1.806272  | H | -1.534863 | -2.530422 | -1.391388 |
| H | 1.174849 | 0.845236  | 4.216225  | H | 6.097938  | 1.392397  | 1.054085  |
| H | 0.171732 | 0.370346  | 2.839804  | H | 4.894819  | 1.330438  | -0.240924 |
| H | 1.666964 | -0.503168 | 3.166721  | H | 4.607829  | 2.340392  | 1.183031  |

## 8B

34

E= -1388.711869

|    |           |           |           |
|----|-----------|-----------|-----------|
| C  | -0.040647 | -0.025133 | 0.076419  |
| C  | -0.033639 | 0.074714  | 1.452959  |
| C  | 1.264580  | 0.074692  | 2.090186  |
| C  | 2.357838  | -0.025180 | 1.253710  |
| Si | 4.178528  | -0.059179 | 1.683951  |
| Si | -1.494712 | -0.059069 | -1.100746 |
| P  | 1.645192  | -0.114650 | -0.326277 |
| O  | 2.297091  | -0.234642 | -1.654390 |
| H  | -0.944503 | 0.149795  | 2.036350  |
| H  | 1.360233  | 0.149754  | 3.167624  |
| C  | -3.059600 | 0.071817  | -0.073748 |

|   |           |           |           |
|---|-----------|-----------|-----------|
| C | -1.347368 | 1.387816  | -2.283464 |
| C | -1.456608 | -1.668928 | -2.060396 |
| C | 4.323308  | 0.071676  | 3.550136  |
| C | 4.914344  | -1.669052 | 1.066774  |
| C | 5.024087  | 1.387692  | 0.843949  |
| H | -2.170472 | 1.392558  | -3.004444 |
| H | -1.360964 | 2.340508  | -1.746735 |
| H | -0.410060 | 1.330544  | -2.844810 |
| H | -3.942931 | 0.056731  | -0.718950 |
| H | -3.147147 | -0.762690 | 0.628067  |
| H | -3.083611 | 1.003041  | 0.499721  |
| H | -2.281946 | -1.719591 | -2.777067 |
| H | -0.520714 | -1.760233 | -2.619578 |
| H | -1.534863 | -2.530422 | -1.391388 |
| H | 6.097938  | 1.392397  | 1.054085  |
| H | 4.894819  | 1.330438  | -0.240924 |
| H | 4.607829  | 2.340392  | 1.183031  |
| H | 5.986151  | -1.719752 | 1.281312  |
| H | 4.432936  | -2.530537 | 1.537896  |
| H | 4.784229  | -1.760338 | -0.015657 |
| H | 5.374051  | 0.056553  | 3.854270  |
| H | 3.884356  | 1.002908  | 3.919931  |
| H | 3.821632  | -0.762822 | 4.048677  |

## 8BH

35

E: -1389.338413

|    |           |           |          |
|----|-----------|-----------|----------|
| C  | 0.018815  | 0.023044  | 0.005599 |
| Si | -0.022863 | 0.002852  | 1.881283 |
| C  | 1.714661  | 0.042203  | 2.589620 |
| C  | -0.839432 | -1.588841 | 2.442349 |
| P  | -0.970035 | -2.130807 | 4.171678 |

|                          |           |           |           |    |              |           |           |  |
|--------------------------|-----------|-----------|-----------|----|--------------|-----------|-----------|--|
| O                        | -1.410028 | -1.179740 | 5.231106  | E= | -2777.525419 |           |           |  |
| C                        | -1.432051 | -2.544087 | 1.706554  | C  | 1.618359     | -3.453089 | -1.714057 |  |
| C                        | -2.049587 | -3.666286 | 2.457615  | Si | 1.995512     | -1.791301 | -2.505641 |  |
| C                        | -1.952817 | -3.612298 | 3.796571  | C  | 3.639139     | -1.879648 | -3.420164 |  |
| Si                       | -2.655510 | -4.781195 | 5.083036  | C  | 2.161939     | -0.447301 | -1.203421 |  |
| C                        | -3.920481 | -3.827549 | 6.080113  | P  | 0.930574     | 0.819544  | -0.806788 |  |
| C                        | -3.430021 | -6.244309 | 4.199981  | O  | -0.118992    | 0.156105  | 0.227052  |  |
| C                        | -1.245951 | -5.337574 | 6.190213  | P  | -1.142623    | -1.151333 | -0.021405 |  |
| C                        | -1.030000 | 1.424722  | 2.565171  | C  | -2.817207    | -0.457035 | -0.063774 |  |
| H                        | -1.478682 | -2.524079 | 0.620913  | C  | -3.500538    | -1.002673 | 0.974950  |  |
| H                        | -2.549460 | -4.469812 | 1.923142  | C  | -2.669320    | -1.738262 | 1.956971  |  |
| H                        | -0.546473 | 2.386336  | 2.368670  | C  | -1.345231    | -1.775311 | 1.666411  |  |
| H                        | -2.029071 | 1.448385  | 2.121210  | Si | 0.074212     | -2.226236 | 2.788617  |  |
| H                        | -1.149963 | 1.310778  | 3.646523  | C  | 0.750528     | -0.607458 | 3.469232  |  |
| H                        | 0.483725  | 0.944181  | -0.358047 | C  | 3.262553     | -0.133911 | -0.485020 |  |
| H                        | 0.593786  | -0.818902 | -0.390712 | C  | 3.155659     | 1.079215  | 0.395841  |  |
| H                        | -0.990005 | -0.025223 | -0.414777 | C  | 1.977241     | 1.729068  | 0.345142  |  |
| H                        | 2.238244  | 0.953970  | 2.286889  | Si | 1.370152     | 3.272877  | 1.209497  |  |
| H                        | 1.688790  | 0.024503  | 3.683381  | C  | -0.190081    | 2.818754  | 2.155170  |  |
| H                        | 2.304745  | -0.813822 | 2.250373  | C  | 2.722974     | 3.899141  | 2.355529  |  |
| H                        | -4.291523 | -4.418514 | 6.922843  | C  | 0.962203     | 4.487552  | -0.165320 |  |
| H                        | -3.472401 | -2.909094 | 6.470449  | C  | 0.596305     | -1.300178 | -3.653100 |  |
| H                        | -4.775508 | -3.542396 | 5.460900  | O  | 0.263440     | 1.539925  | -1.933627 |  |
| H                        | -1.604176 | -6.027977 | 6.959707  | C  | -0.550665    | -3.330138 | 4.178925  |  |
| H                        | -0.464545 | -5.846049 | 5.618440  | C  | 1.434903     | -3.068195 | 1.803307  |  |
| H                        | -0.791602 | -4.482574 | 6.699954  | Si | -3.461200    | 0.754405  | -1.338260 |  |
| H                        | -3.858242 | -6.945661 | 4.922205  | C  | -2.732979    | 0.351409  | -3.019724 |  |
| H                        | -4.236189 | -5.924610 | 3.533159  | C  | -5.343538    | 0.666836  | -1.332051 |  |
| H                        | -2.691325 | -6.788992 | 3.604855  | C  | -2.865116    | 2.465593  | -0.834624 |  |
| H                        | 0.318975  | -2.694299 | 4.389403  | H  | -3.107158    | -2.157514 | 2.856128  |  |
| <b>{8B}</b> <sub>2</sub> |           |           |           | H  | -4.568453    | -0.887792 | 1.124184  |  |
| 68                       |           |           |           | H  | 4.193588     | -0.687156 | -0.531767 |  |

|   |           |           |           |           |              |           |           |
|---|-----------|-----------|-----------|-----------|--------------|-----------|-----------|
| H | 3.992431  | 1.381179  | 1.014089  | H         | 2.413871     | -3.769877 | -1.029407 |
| H | -5.763264 | 1.371563  | -2.060917 | H         | 0.680316     | -3.401119 | -1.148977 |
| H | -5.693656 | -0.339630 | -1.591957 | H         | 0.619577     | -1.887541 | -4.579338 |
| H | -5.748162 | 0.927795  | -0.345760 | H         | -0.371446    | -1.474047 | -3.166199 |
| H | -3.203517 | 0.958771  | -3.803601 | H         | 0.645402     | -0.234968 | -3.905136 |
| H | -1.663957 | 0.600433  | -3.001287 | <b>8C</b> |              |           |           |
| H | -2.850594 | -0.705130 | -3.288489 | 34        |              |           |           |
| H | -3.371118 | 3.245184  | -1.418839 | E=        | -2672.195820 |           |           |
| H | -3.037905 | 2.662544  | 0.230007  | P         | 0.010953     | 0.063215  | 0.177195  |
| H | -1.789550 | 2.534399  | -1.038401 | C         | 0.048822     | 0.097548  | 1.924187  |
| H | 0.260877  | -3.576198 | 4.875257  | C         | 1.734857     | -0.003132 | -0.102327 |
| H | -1.341294 | -2.829633 | 4.752320  | O         | -1.119982    | -0.029964 | -0.758689 |
| H | -0.956973 | -4.269306 | 3.784262  | C         | 2.452955     | -0.094518 | -1.436128 |
| H | 2.277102  | -3.328531 | 2.457488  | C         | 2.114772     | 1.148211  | -2.324560 |
| H | 1.082378  | -3.985283 | 1.317229  | F         | 0.809366     | 1.405220  | -2.313383 |
| H | 1.812578  | -2.395550 | 1.022044  | C         | 2.295745     | -0.028133 | 1.150891  |
| H | 1.641984  | -0.773247 | 4.087456  | C         | 1.380733     | 0.026567  | 2.250676  |
| H | 1.017542  | 0.054904  | 2.636886  | C         | -1.133996    | 0.119891  | 2.874680  |
| H | -0.004244 | -0.092984 | 4.076580  | C         | -0.655107    | 0.129703  | 4.363111  |
| H | -0.806395 | 3.704604  | 2.351109  | F         | -0.078255    | -1.034736 | 4.673701  |
| H | -0.781521 | 2.098622  | 1.578406  | C         | 4.002656     | -0.146867 | -1.234488 |
| H | 0.053945  | 2.346542  | 3.114375  | F         | 4.434545     | 0.844703  | -0.451941 |
| H | 0.333535  | 5.311614  | 0.193169  | F         | 4.357594     | -1.297192 | -0.654871 |
| H | 1.874210  | 4.913250  | -0.601849 | F         | 4.653886     | -0.048976 | -2.387483 |
| H | 0.426418  | 3.960036  | -0.965102 | C         | 2.005537     | -1.408483 | -2.166713 |
| H | 2.404172  | 4.811743  | 2.874421  | F         | 1.990958     | -2.429686 | -1.309839 |
| H | 2.964649  | 3.146875  | 3.117122  | F         | 0.776005     | -1.270902 | -2.656004 |
| H | 3.638221  | 4.132124  | 1.797110  | F         | 2.814090     | -1.732083 | -3.171474 |
| H | 3.603174  | -2.643779 | -4.206969 | F         | 2.736948     | 2.232322  | -1.860169 |
| H | 3.875723  | -0.916963 | -3.888816 | F         | 2.482983     | 0.966556  | -3.589481 |
| H | 4.460765  | -2.139413 | -2.740274 | C         | -2.006341    | 1.395631  | 2.630763  |
| H | 1.507679  | -4.220567 | -2.491370 | F         | -1.383024    | 2.478640  | 3.096192  |

C -1.998683 -1.168235 2.642871  
F -2.698003 -1.060331 1.516227  
F -2.220739 1.589314 1.331986  
F -3.190271 1.306811 3.229971  
F -1.210858 -2.238034 2.532390  
F -2.852705 -1.392949 3.636915  
F 0.241553 1.092538 4.589127  
F -1.663208 0.326968 5.204526  
H 3.356716 -0.083507 1.336417  
H 1.754382 0.012282 3.262271

### 8CH

35

E: -2672.827458

C 0.013296 0.065841 0.036186  
F 0.009200 -0.023453 1.360026  
C 1.454635 -0.015476 -0.556484  
C 2.402077 0.965342 0.224299  
F 2.750009 0.466943 1.411153  
C 1.449194 0.372804 -2.025550  
C 2.139469 -0.230145 -2.998308  
C 2.025411 0.362832 -4.338451  
C 1.243750 1.442025 -4.441757  
C 1.017160 2.260822 -5.701628  
C 1.905207 3.555333 -5.632261  
F 2.048474 4.114241 -6.834368  
P 0.579990 1.814883 -2.766956  
O 0.801606 3.156844 -2.191909  
C 1.978296 -1.477946 -0.366440  
F 1.756882 -1.934989 0.860099  
F -0.579068 1.215965 -0.292243  
F -0.741740 -0.919415 -0.455860  
C 1.414722 1.446247 -6.977333

F 0.993715 2.026510 -8.094623  
C -0.485309 2.662614 -5.830112  
F -0.681876 3.575448 -6.772783  
F 2.745244 1.322797 -7.056221  
F 0.901161 0.215394 -6.949311  
F 1.391025 -2.320458 -1.217812  
F 3.296314 -1.534574 -0.592952  
F 3.516729 1.177332 -0.471358  
F 1.810359 2.133361 0.427773  
F -1.224249 1.589185 -6.120984  
F -0.951160 3.160956 -4.682846  
F 1.366730 4.455955 -4.823064  
F 3.118577 3.255393 -5.174969  
H 2.762773 -1.103331 -2.863438  
H 2.567170 -0.088170 -5.158365  
H -0.749242 1.348646 -2.860470

### {8C}2

68

E= -5344.498772

C -3.503468 -2.677495 -0.338852  
C -3.201109 -1.830948 0.946677  
C -2.626540 -0.464739 0.585172  
P -1.077074 0.343330 1.163971  
O 0.087731 -0.060732 0.155056  
P 1.148435 -1.187841 -0.461434  
C 2.771984 -0.572934 0.186202  
C 3.420501 0.078920 -0.788816  
C 2.699670 0.212184 -2.049419  
C 1.483717 -0.347643 -2.076402  
C 0.631446 -0.407475 -3.340896  
C 1.496057 -0.941746 -4.533024  
C -2.231743 -2.658144 1.848103



|   |           |           |           |           |              |           |           |
|---|-----------|-----------|-----------|-----------|--------------|-----------|-----------|
| C | -4.532952 | -1.608402 | 1.740126  | F         | -0.179487    | -2.631997 | -3.095055 |
| C | -3.319840 | 0.463809  | -0.079386 | F         | -1.229536    | -1.083443 | -2.026952 |
| C | -2.719267 | 1.804524  | -0.167700 | F         | -0.437117    | 1.071378  | -4.902192 |
| C | -1.547459 | 1.971387  | 0.447227  | F         | -0.848716    | 1.371339  | -2.806416 |
| C | -0.824372 | 3.299890  | 0.616136  | F         | 1.058397     | 1.933900  | -3.627505 |
| C | -1.323615 | 4.347319  | -0.436778 | F         | 1.375500     | 4.247730  | 0.770334  |
| C | -1.135759 | 3.853983  | 2.055199  | F         | 1.186132     | 2.163174  | 1.219020  |
| C | 0.717794  | 3.137443  | 0.447810  | F         | 1.014903     | 2.832766  | -0.818045 |
| O | -0.803575 | 0.260888  | 2.602195  | F         | -0.850620    | 5.153442  | 2.149403  |
| C | -0.584645 | -1.365572 | -3.163546 | F         | -2.427026    | 3.699440  | 2.340155  |
| C | 0.093977  | 1.019815  | -3.681333 | F         | -0.430714    | 3.212671  | 2.975751  |
| C | 3.454383  | -0.972633 | 1.493094  | F         | -0.556222    | 5.430184  | -0.474376 |
| C | 4.839517  | -1.633403 | 1.173768  | F         | -1.343921    | 3.832102  | -1.664761 |
| C | 3.681197  | 0.285188  | 2.397635  | F         | -2.569607    | 4.745129  | -0.147906 |
| C | 2.603140  | -2.009212 | 2.286875  | F         | -4.931186    | -2.711033 | 2.366391  |
| H | 3.171252  | 0.692932  | -2.896086 | F         | -4.392412    | -0.648206 | 2.646262  |
| H | 4.437560  | 0.438729  | -0.707536 | F         | -5.515150    | -1.237928 | 0.905620  |
| H | -4.303811 | 0.301037  | -0.495624 | F         | -4.354137    | -3.668838 | -0.082706 |
| H | -3.264101 | 2.585197  | -0.678791 | F         | -4.041721    | -1.935503 | -1.307146 |
| F | 5.329142  | -2.304003 | 2.211120  | F         | -2.382490    | -3.213190 | -0.819671 |
| F | 4.739438  | -2.482476 | 0.152409  | F         | -2.561297    | -3.947796 | 1.873524  |
| F | 5.742203  | -0.702518 | 0.834721  | F         | -0.986172    | -2.574586 | 1.368138  |
| F | 3.035039  | -2.169889 | 3.531821  | F         | -2.229699    | -2.211283 | 3.093736  |
| F | 1.332562  | -1.621605 | 2.345235  |           |              |           |           |
| F | 2.635975  | -3.199859 | 1.680201  | <b>8D</b> |              |           |           |
| F | 4.577266  | 0.040810  | 3.354477  | 34        |              |           |           |
| F | 4.133486  | 1.317538  | 1.683669  | E=        | -3175.000232 |           |           |
| F | 2.547429  | 0.654027  | 2.977857  | C         | 0.061182     | 0.147495  | 0.134156  |
| F | 0.748367  | -1.310150 | -5.569237 | F         | 0.179847     | 0.396438  | 1.449072  |
| F | 2.343308  | 0.000418  | -4.965571 | Si        | 1.798460     | -0.020918 | -0.691914 |
| F | 2.220344  | -1.992942 | -4.158867 | C         | 2.832096     | 1.545003  | -0.228848 |
| F | -1.467841 | -1.265040 | -4.149578 | F         | 3.815309     | 1.763577  | -1.111932 |

|    |           |           |           |    |              |           |           |
|----|-----------|-----------|-----------|----|--------------|-----------|-----------|
| F  | -0.668017 | 1.129011  | -0.405431 | E: | -3175.623591 |           |           |
| F  | -0.649663 | -0.994687 | 0.010993  | C  | -0.292911    | -0.000689 | 0.271524  |
| C  | 1.549711  | -0.028098 | -2.605169 | F  | -0.542410    | -0.149283 | 1.588789  |
| F  | 0.570156  | -0.883481 | -2.950465 | F  | 1.039165     | 0.146402  | 0.140710  |
| C  | 2.606133  | -1.559208 | -0.112447 | Si | -0.905520    | -1.535689 | -0.727498 |
| C  | 2.005883  | -2.646940 | 0.505241  | C  | -0.319219    | -3.079003 | 0.084375  |
| C  | 2.882436  | -3.727583 | 0.852184  | P  | -0.716451    | -4.782347 | -0.438384 |
| C  | 4.218212  | -3.549096 | 0.522294  | O  | -0.567326    | -5.156547 | -1.860704 |
| Si | 5.604282  | -4.708956 | 0.819012  | F  | -0.871485    | 1.137703  | -0.120271 |
| C  | 6.767745  | -4.837926 | -0.718752 | C  | -0.244349    | -1.376758 | -2.535471 |
| F  | 7.654003  | -3.833972 | -0.750015 | F  | 1.029908     | -1.787548 | -2.613927 |
| F  | 1.221730  | 1.179018  | -3.083982 | C  | -2.833781    | -1.503686 | -0.777814 |
| F  | 2.668823  | -0.426850 | -3.231357 | F  | -3.314535    | -2.696981 | -1.176498 |
| P  | 4.281050  | -1.985872 | -0.220300 | F  | -0.968300    | -2.105996 | -3.390666 |
| O  | 5.420114  | -1.240960 | -0.777670 | F  | -0.283897    | -0.099374 | -2.952677 |
| C  | 6.671512  | -4.166115 | 2.331901  | F  | -3.335801    | -1.262569 | 0.446374  |
| F  | 6.007353  | -4.386282 | 3.481183  | F  | -3.317202    | -0.572893 | -1.606995 |
| C  | 4.905054  | -6.471348 | 1.185058  | C  | 0.503599     | -3.150279 | 1.144565  |
| F  | 4.352924  | -7.004570 | 0.082400  | C  | 0.881313     | -4.515078 | 1.570577  |
| F  | 7.834467  | -4.826809 | 2.402319  | C  | 0.369369     | -5.518817 | 0.836758  |
| F  | 6.949074  | -2.853384 | 2.274851  | Si | 0.634212     | -7.314621 | 1.143262  |
| F  | 5.846466  | -7.313782 | 1.621408  | C  | 1.406588     | -7.581885 | 2.893769  |
| F  | 3.938857  | -6.425980 | 2.128154  | F  | 2.506928     | -6.816431 | 3.059401  |
| F  | 7.455491  | -5.989593 | -0.723865 | C  | -1.067848    | -8.224476 | 1.100811  |
| F  | 6.055712  | -4.787355 | -1.858335 | F  | -1.975172    | -7.550548 | 1.835086  |
| F  | 2.068868  | 2.647328  | -0.186941 | C  | 1.811282     | -8.126304 | -0.151832 |
| F  | 3.398204  | 1.399186  | 0.982137  | F  | 1.441537     | -7.850809 | -1.404253 |
| H  | 0.946611  | -2.692293 | 0.721158  | F  | -1.543657    | -8.290011 | -0.153458 |
| H  | 2.508716  | -4.619434 | 1.337639  | F  | -1.003960    | -9.470452 | 1.582428  |
|    |           |           |           | F  | 3.066255     | -7.669952 | 0.016755  |
|    |           |           |           | F  | 1.844478     | -9.461168 | -0.015208 |
|    |           |           |           | F  | 0.536178     | -7.230175 | 3.856651  |

**8DH**

|                         |           |           |           |   |           |           |           |
|-------------------------|-----------|-----------|-----------|---|-----------|-----------|-----------|
| F                       | 1.765836  | -8.850043 | 3.111186  | C | -1.252045 | 4.639097  | -2.128035 |
| H                       | 0.887742  | -2.290638 | 1.682658  | C | -1.953677 | -3.699187 | 0.040058  |
| H                       | 1.530809  | -4.653198 | 2.427878  | C | -3.713766 | -3.313998 | 2.566435  |
| H                       | -1.995011 | -4.981611 | 0.138149  | H | -0.004166 | 0.086009  | 4.766420  |
| <b>{8D}<sub>2</sub></b> |           |           |           | H | -1.926966 | -1.526378 | 4.147251  |
| 68                      |           |           |           | H | 3.040593  | 1.201958  | -2.728974 |
| E= -6350.104781         |           |           |           | H | 1.324145  | 3.115528  | -2.662234 |
| C                       | 3.764583  | -1.935843 | -0.474578 | F | -4.537998 | -3.875005 | 2.115807  |
| Si                      | 2.605480  | -1.796375 | -1.942028 | F | -3.107111 | -4.016174 | 3.145468  |
| C                       | 1.391469  | -3.218009 | -1.934503 | F | -4.150217 | -2.589262 | 3.260356  |
| C                       | 3.608303  | -1.769125 | -3.529924 | F | -2.733434 | -4.342177 | -0.379839 |
| C                       | 1.637238  | -0.178329 | -1.879567 | F | -1.483137 | -3.165846 | -0.791809 |
| C                       | 2.043114  | 1.017524  | -2.339064 | F | -1.207296 | -4.339943 | 0.517879  |
| C                       | 1.040071  | 2.120199  | -2.332895 | F | -4.625796 | -1.730171 | -0.146145 |
| C                       | -0.191484 | 1.800579  | -1.910638 | F | -4.090959 | -0.419537 | 0.919952  |
| Si                      | -1.727134 | 2.866253  | -1.739885 | F | -3.161770 | -0.822888 | -0.544720 |
| C                       | -2.999965 | 2.210077  | -2.947283 | F | 3.157412  | 2.726778  | 4.452420  |
| P                       | -0.113169 | 0.053344  | -1.452006 | F | 1.557961  | 2.240209  | 5.018291  |
| O                       | -1.087101 | -0.906981 | -2.026797 | F | 2.873482  | 1.057004  | 4.962353  |
| O                       | -0.216746 | 0.195992  | 0.157054  | F | 4.206732  | 1.692571  | 1.672149  |
| P                       | 0.218342  | -0.938591 | 1.317191  | F | 3.898881  | 0.003451  | 2.107222  |
| C                       | 0.660727  | 0.114681  | 2.718449  | F | 3.154955  | 0.695012  | 0.660591  |
| Si                      | 1.953076  | 1.466357  | 2.683444  | F | 1.893991  | 3.761160  | 1.708669  |
| C                       | 3.444312  | 0.907695  | 1.694373  | F | 0.842836  | 2.644623  | 0.813056  |
| C                       | -1.325602 | -1.496149 | 2.080495  | F | 0.309688  | 3.309199  | 2.362722  |
| Si                      | -2.695605 | -2.463835 | 1.235482  | F | -3.286749 | 3.263250  | 0.147902  |
| C                       | -3.746542 | -1.238039 | 0.281469  | F | -2.549963 | 1.654571  | 0.263778  |
| C                       | -1.231613 | -1.173298 | 3.389994  | F | -1.623310 | 3.076775  | 0.735475  |
| C                       | -0.129652 | -0.265419 | 3.745483  | F | -3.955260 | 2.732212  | -2.837968 |
| C                       | 1.179005  | 2.938956  | 1.811849  | F | -2.662710 | 2.327519  | -3.980806 |
| C                       | 2.428630  | 1.910790  | 4.443565  | F | -3.168967 | 1.143516  | -2.772628 |
| C                       | -2.356504 | 2.701910  | 0.017147  | F | -2.121585 | 5.297799  | -2.045482 |

|                 |           |           |           |    |           |           |           |
|-----------------|-----------|-----------|-----------|----|-----------|-----------|-----------|
| F               | -0.490648 | 5.003966  | -1.432361 | C  | 3.828223  | -3.152190 | 1.424320  |
| F               | -0.860124 | 4.734728  | -3.144920 | C  | 3.855927  | -2.516241 | -2.574547 |
| F               | 4.194388  | -2.687846 | -3.629070 | C  | 4.491638  | 0.389957  | -3.317115 |
| F               | 2.956955  | -1.686791 | -4.404156 | P  | 0.011546  | 0.696434  | 0.003225  |
| F               | 4.308401  | -0.928378 | -3.549177 | Si | -3.548769 | -0.784622 | 2.092440  |
| F               | 4.320501  | -2.877237 | -0.531392 | C  | -5.174775 | -0.039398 | 2.693193  |
| F               | 4.488794  | -1.117281 | -0.445947 | Si | -3.582816 | 2.141122  | -0.363107 |
| F               | 3.205620  | -1.929195 | 0.464477  | C  | -5.454627 | 2.365198  | -0.460055 |
| F               | 1.904540  | -4.161465 | -2.144240 | C  | -3.640784 | -2.665786 | 2.205945  |
| F               | 0.912653  | -3.307385 | -0.955540 | C  | -2.136625 | -0.173636 | 3.181436  |
| F               | 0.600190  | -3.075405 | -2.674309 | C  | -2.940450 | 3.111292  | 1.121147  |
|                 |           |           |           | C  | -2.792539 | 2.814635  | -1.935707 |
| <b>8E</b>       |           |           |           | C  | -4.592619 | -0.509441 | -3.268293 |
| 88              |           |           |           | C  | -3.907502 | -3.135184 | -1.840525 |
| E= -3604.866416 |           |           |           | H  | 1.336389  | -2.504833 | -1.098991 |
| C               | 5.440734  | 2.429765  | 0.195244  | H  | -1.250215 | -2.539861 | -1.088591 |
| Si              | 3.572083  | 2.167451  | 0.235786  | H  | 3.013187  | 4.282831  | -0.952280 |
| Si              | 3.156499  | -0.116412 | -0.125593 | H  | 3.141663  | 2.940526  | -2.100195 |
| C               | 1.324405  | -0.450466 | -0.409451 | H  | 1.691297  | 3.117878  | -1.104470 |
| C               | 0.762325  | -1.628937 | -0.808845 | H  | 3.103693  | 3.772771  | 2.084054  |
| C               | -0.699256 | -1.648891 | -0.803467 | H  | 1.839978  | 2.537060  | 1.999035  |
| C               | -1.285533 | -0.487673 | -0.400252 | H  | 3.404150  | 2.154331  | 2.730268  |
| Si              | -3.117732 | -0.151136 | -0.125754 | H  | 5.685823  | 3.469021  | 0.436787  |
| Si              | -4.500153 | -1.361618 | -1.588310 | H  | 5.954878  | 1.787571  | 0.915942  |
| C               | -6.227899 | -1.414540 | -0.830691 | H  | 5.850126  | 2.215204  | -0.796294 |
| C               | 2.779641  | 3.224482  | -1.108091 | H  | 2.461328  | -1.598884 | 3.988700  |
| C               | 2.917696  | 2.706278  | 1.920375  | H  | 2.112603  | -0.014718 | 3.276543  |
| Si              | 3.680601  | -1.312967 | 1.822539  | H  | 1.335799  | -1.461382 | 2.627780  |
| C               | 5.300942  | -0.708654 | 2.576326  | H  | 5.567238  | -1.300449 | 3.457916  |
| Si              | 4.482883  | -0.866113 | -1.910374 | H  | 6.124065  | -0.783996 | 1.859612  |
| C               | 6.245002  | -1.097151 | -1.275203 | H  | 5.224485  | 0.337230  | 2.888343  |
| C               | 2.268542  | -1.073003 | 3.048264  | H  | 4.011764  | -3.734587 | 2.332988  |

|   |           |           |           |                 |           |           |           |
|---|-----------|-----------|-----------|-----------------|-----------|-----------|-----------|
| H | 2.906017  | -3.527109 | 0.969710  | H               | -4.662949 | -3.709340 | -2.386975 |
| H | 4.649081  | -3.349049 | 0.728459  | H               | -2.983663 | -3.167535 | -2.424647 |
| H | 6.915637  | -1.393308 | -2.088224 | H               | -3.727177 | -3.639947 | -0.887123 |
| H | 6.637135  | -0.175356 | -0.836224 | H               | -3.140758 | 4.180590  | 0.997401  |
| H | 6.288061  | -1.875883 | -0.507780 | H               | -3.424001 | 2.785136  | 2.046793  |
| H | 4.530101  | -2.896522 | -3.348941 | H               | -1.861281 | 2.983002  | 1.242671  |
| H | 3.796315  | -3.269240 | -1.783105 | O               | -0.645555 | 2.307396  | -0.021715 |
| H | 2.862587  | -2.410471 | -3.019760 |                 |           |           |           |
| H | 5.062699  | 0.012725  | -4.171647 | <b>SEH</b>      |           |           |           |
| H | 3.475130  | 0.603396  | -3.660164 | 89              |           |           |           |
| H | 4.944443  | 1.335407  | -3.004582 | E: -3605.495049 |           |           |           |
| H | -3.750462 | -2.993708 | 3.244609  | C               | -5.504215 | 2.390716  | 0.119786  |
| H | -4.490606 | -3.058726 | 1.639893  | Si              | -3.624816 | 2.201693  | 0.067650  |
| H | -2.730745 | -3.122017 | 1.804357  | C               | -2.861306 | 3.065962  | 1.548355  |
| H | -2.318709 | -0.414857 | 4.233696  | C               | -2.973826 | 2.964717  | -1.525074 |
| H | -1.190555 | -0.639255 | 2.889272  | Si              | -3.185029 | -0.112536 | 0.111617  |
| H | -2.010435 | 0.909868  | 3.100390  | Si              | -3.705219 | -1.071848 | -1.968538 |
| H | -5.394068 | -0.358594 | 3.717075  | C               | -2.338180 | -0.684687 | -3.208414 |
| H | -5.130983 | 1.053840  | 2.688143  | Si              | -4.500657 | -1.120291 | 1.778995  |
| H | -6.013100 | -0.342860 | 2.059494  | C               | -3.890094 | -2.846863 | 2.233718  |
| H | -5.710596 | 3.428828  | -0.500459 | C               | -1.349564 | -0.468788 | 0.360894  |
| H | -5.871377 | 1.889413  | -1.352586 | C               | -0.747313 | -1.565896 | 0.856881  |
| H | -5.952273 | 1.933495  | 0.413296  | C               | 0.734181  | -1.571626 | 0.849319  |
| H | -6.930656 | -1.910513 | -1.507945 | C               | 1.340516  | -0.481527 | 0.342976  |
| H | -6.228188 | -1.967950 | 0.113079  | Si              | 3.176810  | -0.118550 | 0.111729  |
| H | -6.609769 | -0.409946 | -0.628368 | Si              | 3.719755  | -0.850492 | -2.053780 |
| H | -5.212167 | -1.085745 | -3.963022 | C               | 3.854665  | -2.731936 | -2.068485 |
| H | -5.030316 | 0.489120  | -3.179686 | C               | -4.519117 | -0.055805 | 3.333044  |
| H | -3.599500 | -0.400018 | -3.713520 | C               | -6.257486 | -1.269708 | 1.107739  |
| H | -3.012624 | 3.880400  | -2.055596 | P               | -0.003731 | 0.596034  | -0.233841 |
| H | -1.705135 | 2.698038  | -1.909214 | O               | 0.007378  | 2.052616  | 0.103819  |
| H | -3.163260 | 2.290916  | -2.821395 | C               | -3.824589 | -2.944944 | -1.778822 |

|    |           |           |           |   |           |           |           |
|----|-----------|-----------|-----------|---|-----------|-----------|-----------|
| C  | -5.341668 | -0.395042 | -2.613052 | H | -6.648027 | -0.302380 | 0.780111  |
| Si | 3.616059  | 2.189687  | 0.305407  | H | -6.299511 | -1.953339 | 0.254624  |
| C  | 3.018517  | 3.109585  | -1.223230 | H | -4.623125 | -3.344882 | 2.876825  |
| Si | 4.491451  | -1.288996 | 1.670731  | H | -3.742686 | -3.472177 | 1.348530  |
| C  | 4.472062  | -0.404962 | 3.334178  | H | -2.946772 | -2.803648 | 2.785250  |
| C  | 2.794818  | 2.896585  | 1.838485  | H | -5.109994 | -0.531076 | 4.122744  |
| C  | 5.491308  | 2.379371  | 0.441905  | H | -3.506939 | 0.100938  | 3.716846  |
| C  | 3.915813  | -3.069161 | 1.923100  | H | -4.954445 | 0.927660  | 3.134395  |
| C  | 6.257158  | -1.335213 | 1.008059  | H | 4.043225  | -3.104574 | -3.080422 |
| C  | 2.376648  | -0.334318 | -3.272241 | H | 4.669779  | -3.078907 | -1.426627 |
| C  | 5.362424  | -0.096634 | -2.588835 | H | 2.928198  | -3.191233 | -1.710173 |
| H  | -1.288036 | -2.423975 | 1.244223  | H | 2.676189  | -0.575297 | -4.297313 |
| H  | 1.271622  | -2.431788 | 1.235886  | H | 1.438755  | -0.859882 | -3.069752 |
| H  | -3.145426 | 4.123514  | 1.561056  | H | 2.177759  | 0.740243  | -3.224356 |
| H  | -3.184125 | 2.617951  | 2.492250  | H | 5.655241  | -0.468605 | -3.575890 |
| H  | -1.772160 | 3.001526  | 1.481082  | H | 5.292430  | 0.993363  | -2.650236 |
| H  | -3.270503 | 4.016640  | -1.591728 | H | 6.164302  | -0.340784 | -1.886378 |
| H  | -1.881235 | 2.925292  | -1.537206 | H | 5.758124  | 3.441139  | 0.459873  |
| H  | -3.358483 | 2.452122  | -2.411907 | H | 5.876440  | 1.927570  | 1.360822  |
| H  | -5.777016 | 3.446654  | 0.023122  | H | 6.011608  | 1.919958  | -0.403548 |
| H  | -5.994733 | 1.844156  | -0.690763 | H | 6.927140  | -1.796833 | 1.740634  |
| H  | -5.916199 | 2.029908  | 1.066968  | H | 6.318418  | -1.921657 | 0.086460  |
| H  | -2.602176 | -1.058021 | -4.203074 | H | 6.635833  | -0.332603 | 0.792406  |
| H  | -2.157208 | 0.390991  | -3.290068 | H | 5.067722  | -0.950677 | 4.073075  |
| H  | -1.399181 | -1.162406 | -2.912983 | H | 4.883619  | 0.604839  | 3.250465  |
| H  | -5.616557 | -0.878158 | -3.556095 | H | 3.452864  | -0.316075 | 3.721344  |
| H  | -6.153645 | -0.563378 | -1.899922 | H | 3.078974  | 3.945210  | 1.975739  |
| H  | -5.275499 | 0.681486  | -2.796370 | H | 1.709152  | 2.846410  | 1.720601  |
| H  | -3.995473 | -3.427872 | -2.746291 | H | 3.077683  | 2.348548  | 2.741661  |
| H  | -2.898656 | -3.352535 | -1.361238 | H | 4.678210  | -3.631508 | 2.472244  |
| H  | -4.645072 | -3.228674 | -1.113363 | H | 2.993628  | -3.114234 | 2.509109  |
| H  | -6.929756 | -1.658960 | 1.879182  | H | 3.743691  | -3.580823 | 0.972017  |

|                          |           |           |           |    |           |           |           |
|--------------------------|-----------|-----------|-----------|----|-----------|-----------|-----------|
| H                        | 3.312032  | 4.163264  | -1.171085 | Si | 1.357959  | 4.672383  | 1.116505  |
| H                        | 3.437257  | 2.691513  | -2.143603 | C  | -0.393538 | 4.646796  | 0.442927  |
| H                        | 1.927339  | 3.066973  | -1.276184 | C  | 2.524852  | -1.313883 | -0.010543 |
| H                        | -0.019132 | 0.347371  | -1.630968 | Si | 3.177287  | -2.558473 | -1.297988 |
|                          |           |           |           | Si | 4.519634  | -1.268905 | -2.770135 |
| <b>{8E}</b> <sub>2</sub> |           |           |           | C  | 5.199248  | 0.176364  | -1.773726 |
| 176                      |           |           |           | C  | 3.079184  | -1.239947 | 1.225873  |
| E= -7209.824800          |           |           |           | C  | 2.854024  | -0.017283 | 1.964117  |
| C                        | -4.686421 | -2.844235 | 5.228963  | Si | 1.195884  | 2.577720  | 4.266086  |
| Si                       | -4.053195 | -1.270816 | 4.393646  | C  | 1.503302  | 0.872330  | 5.004826  |
| C                        | -5.509289 | -0.091899 | 4.142215  | Si | 4.466648  | 3.130227  | 2.410030  |
| Si                       | -3.086942 | -1.867545 | 2.315322  | C  | 5.343250  | 2.870984  | 0.765343  |
| C                        | -2.520022 | -0.395826 | 1.254188  | C  | 2.002080  | 3.830721  | 5.424927  |
| C                        | -3.306807 | 0.713898  | 1.225312  | C  | -0.650872 | 2.954780  | 4.158674  |
| C                        | -3.246438 | 1.532632  | 0.035868  | Si | -0.617215 | 3.034479  | -3.553718 |
| C                        | -2.402693 | 1.110690  | -0.939508 | C  | 1.088905  | 2.502528  | -2.966817 |
| Si                       | -2.436002 | 1.769658  | -2.718071 | Si | -2.821783 | -0.114238 | -4.095491 |
| Si                       | -4.350935 | 3.130827  | -2.964477 | C  | -4.021194 | -1.298742 | -3.255276 |
| C                        | -4.409063 | 4.613412  | -1.796704 | C  | -0.675941 | 2.864325  | -5.434067 |
| C                        | -2.892427 | -0.500993 | 5.655622  | C  | -0.838135 | 4.872457  | -3.177543 |
| Si                       | -4.921681 | -2.679095 | 1.034830  | C  | -3.581574 | 0.384906  | -5.749655 |
| C                        | -4.365415 | -3.918048 | -0.268487 | C  | -1.202044 | -1.002410 | -4.463588 |
| Si                       | -1.571091 | -3.626118 | 2.645779  | C  | -4.394355 | 3.837952  | -4.715101 |
| C                        | -0.164994 | -3.139676 | 3.800643  | C  | -5.890477 | 2.073133  | -2.695584 |
| C                        | -6.249832 | -3.529245 | 2.074474  | C  | 4.802858  | 4.887485  | 3.016114  |
| C                        | -5.730145 | -1.219861 | 0.153444  | C  | 5.252705  | 1.970090  | 3.680378  |
| C                        | -2.520464 | -5.076182 | 3.394458  | C  | 1.342629  | 5.952505  | 2.508951  |
| C                        | -0.870396 | -4.226408 | 1.011508  | C  | 2.532049  | 5.340825  | -0.200398 |
| P                        | -1.702530 | -0.471270 | -0.379739 | Si | 4.765173  | -3.937818 | -0.204434 |
| P                        | 1.711488  | 0.296327  | -0.307108 | C  | 3.998379  | -4.922818 | 1.213864  |
| C                        | 2.122948  | 0.948372  | 1.346431  | Si | 1.699194  | -4.006924 | -2.465902 |
| Si                       | 2.155638  | 2.689440  | 2.122024  | C  | -0.125513 | -3.523265 | -2.453176 |

|   |           |           |           |   |           |           |           |
|---|-----------|-----------|-----------|---|-----------|-----------|-----------|
| C | 5.523011  | -5.171634 | -1.420360 | H | -0.498178 | 4.003947  | -0.429959 |
| C | 6.205464  | -2.921799 | 0.482368  | H | -1.098552 | 4.289987  | 1.198410  |
| C | 2.305328  | -4.068172 | -4.252883 | H | 1.132877  | 6.936118  | 2.074726  |
| C | 1.780389  | -5.768022 | -1.786402 | H | 0.559375  | 5.745163  | 3.242728  |
| C | 5.968828  | -2.277642 | -3.441888 | H | 2.293791  | 6.019918  | 3.039552  |
| C | 3.619246  | -0.586095 | -4.276024 | H | -1.123054 | 2.971540  | 5.145935  |
| H | 3.314491  | 0.120043  | 2.936590  | H | -0.814846 | 3.933015  | 3.697774  |
| H | 3.716196  | -2.010067 | 1.645746  | H | -1.158335 | 2.209839  | 3.539722  |
| H | -3.895368 | 2.394615  | -0.065476 | H | 1.560845  | 3.743664  | 6.423522  |
| H | -4.047568 | 0.928250  | 1.989773  | H | 3.075611  | 3.644986  | 5.522759  |
| H | -5.267967 | 5.241140  | -2.057662 | H | 1.866807  | 4.860572  | 5.088408  |
| H | -4.510655 | 4.334645  | -0.745534 | H | 1.089776  | 0.806464  | 6.015100  |
| H | -3.507486 | 5.223814  | -1.887555 | H | 1.051772  | 0.082865  | 4.399697  |
| H | -5.311308 | 4.420957  | -4.851622 | H | 2.576911  | 0.672965  | 5.073525  |
| H | -3.550060 | 4.508313  | -4.898509 | H | 5.881835  | 5.014624  | 3.154287  |
| H | -4.376026 | 3.060079  | -5.481244 | H | 4.470156  | 5.648741  | 2.306619  |
| H | -6.794380 | 2.690670  | -2.694765 | H | 4.320715  | 5.086850  | 3.976969  |
| H | -5.995156 | 1.330390  | -3.492043 | H | 6.263894  | 2.318132  | 3.916190  |
| H | -5.847209 | 1.532668  | -1.745291 | H | 4.688171  | 1.938823  | 4.616837  |
| H | 0.108410  | 3.479337  | -5.887481 | H | 5.339702  | 0.949280  | 3.300242  |
| H | -0.518010 | 1.832216  | -5.757696 | H | 6.415033  | 3.075778  | 0.856394  |
| H | -1.636242 | 3.200115  | -5.835949 | H | 5.226704  | 1.837390  | 0.432269  |
| H | 0.015644  | 5.430807  | -3.576253 | H | 4.940208  | 3.518143  | -0.018501 |
| H | -1.742562 | 5.268508  | -3.647508 | H | -1.383711 | -1.928843 | -5.017530 |
| H | -0.897513 | 5.079343  | -2.108240 | H | -0.547408 | -0.375488 | -5.074034 |
| H | 1.838167  | 3.219991  | -3.319252 | H | -0.665602 | -1.261799 | -3.547113 |
| H | 1.153401  | 2.437084  | -1.879768 | H | -4.195290 | -2.171836 | -3.892976 |
| H | 1.353856  | 1.519707  | -3.358542 | H | -3.627374 | -1.656672 | -2.302665 |
| H | 2.155643  | 6.301527  | -0.567828 | H | -4.985584 | -0.821249 | -3.061993 |
| H | 3.529447  | 5.513431  | 0.212353  | H | -3.651862 | -0.495009 | -6.397838 |
| H | 2.636695  | 4.677380  | -1.059383 | H | -4.593133 | 0.780426  | -5.622670 |
| H | -0.686234 | 5.663679  | 0.160438  | H | -2.984093 | 1.136321  | -6.272243 |



|   |           |           |           |           |              |           |           |
|---|-----------|-----------|-----------|-----------|--------------|-----------|-----------|
| H | -6.090576 | -0.018204 | 5.067295  | H         | -0.509036    | -3.424331 | -3.471597 |
| H | -5.169034 | 0.917484  | 3.892741  | H         | 1.793293     | -4.870115 | -4.794847 |
| H | -6.184359 | -0.427531 | 3.349993  | H         | 2.092764     | -3.127208 | -4.766713 |
| H | -5.418255 | -2.567725 | 5.995596  | H         | 3.381530     | -4.255014 | -4.318699 |
| H | -5.160589 | -3.557013 | 4.554597  | H         | 6.486190     | -1.688505 | -4.206515 |
| H | -3.863036 | -3.354615 | 5.736510  | H         | 6.698108     | -2.526412 | -2.667221 |
| H | -3.439174 | -0.344999 | 6.592157  | H         | 5.639903     | -3.210138 | -3.908867 |
| H | -2.045814 | -1.158594 | 5.868934  | H         | 5.998786     | -5.984754 | -0.861898 |
| H | -2.497372 | 0.459553  | 5.331461  | H         | 4.791363     | -5.620343 | -2.095284 |
| H | 0.521571  | -3.980427 | 3.946146  | H         | 6.291654     | -4.699370 | -2.035279 |
| H | 0.403859  | -2.303044 | 3.387966  | H         | 6.948758     | -3.592873 | 0.925922  |
| H | -0.540063 | -2.837594 | 4.782867  | H         | 6.701965     | -2.356824 | -0.311254 |
| H | -1.867918 | -5.954075 | 3.446704  | H         | 5.901257     | -2.207330 | 1.250708  |
| H | -2.884621 | -4.870190 | 4.402562  | H         | 5.962976     | 0.716615  | -2.342515 |
| H | -3.382956 | -5.342655 | 2.775568  | H         | 4.400414     | 0.883169  | -1.533306 |
| H | -0.090329 | -4.970153 | 1.198129  | H         | 5.647495     | -0.157480 | -0.833721 |
| H | -1.646661 | -4.688979 | 0.398503  | H         | 4.784512     | -5.439486 | 1.774579  |
| H | -0.425627 | -3.409337 | 0.442243  | H         | 3.443808     | -4.292096 | 1.913741  |
| H | -7.072282 | -3.835882 | 1.419418  | H         | 3.309563     | -5.680487 | 0.830133  |
| H | -5.869239 | -4.428543 | 2.567288  | H         | 4.235696     | 0.182211  | -4.755026 |
| H | -6.665125 | -2.871732 | 2.842958  | H         | 3.424596     | -1.369288 | -5.012532 |
| H | -6.578636 | -1.569301 | -0.444118 | H         | 2.664463     | -0.135581 | -4.008524 |
| H | -6.100818 | -0.472179 | 0.860929  | O         | 0.024158     | 0.040103  | -0.646027 |
| H | -5.028435 | -0.719819 | -0.518204 | O         | 2.421645     | 1.315393  | -1.525624 |
| H | -5.205304 | -4.180721 | -0.920042 |           |              |           |           |
| H | -3.573381 | -3.505970 | -0.895466 | <b>8F</b> |              |           |           |
| H | -3.991489 | -4.840228 | 0.186264  | 76        |              |           |           |
| H | 1.125736  | -6.401342 | -2.395394 | E=        | -2036.084436 |           |           |
| H | 2.780801  | -6.203620 | -1.816081 | C         | 4.244999     | -0.919373 | -2.031549 |
| H | 1.418913  | -5.813171 | -0.757136 | C         | 3.688873     | -1.255173 | -0.791898 |
| H | -0.701308 | -4.307416 | -1.955991 | C         | 4.234290     | -2.329859 | -0.097998 |
| H | -0.318479 | -2.585270 | -1.929825 | C         | 5.288969     | -3.064548 | -0.635789 |

|   |           |           |           |   |           |           |           |
|---|-----------|-----------|-----------|---|-----------|-----------|-----------|
| C | 5.814791  | -2.736456 | -1.874743 | C | -2.696917 | -2.417906 | 2.163891  |
| C | 5.287726  | -1.653393 | -2.572080 | C | -2.686910 | -1.844140 | 0.903780  |
| C | 2.858189  | -0.136985 | -0.124890 | C | -3.422068 | -1.158198 | -1.122578 |
| C | 1.432255  | -0.167915 | -0.676114 | C | -3.457969 | -1.474748 | -2.485113 |
| P | 0.034370  | 0.643107  | 0.094896  | C | -4.132948 | -2.594016 | -2.943529 |
| O | 0.043314  | 2.008329  | 0.696504  | C | -4.809210 | -3.417598 | -2.048601 |
| C | 2.713718  | -0.348002 | 1.400895  | C | -4.805155 | -3.099445 | -0.700218 |
| C | 1.974158  | -1.444135 | 1.863111  | C | -4.117703 | -1.978500 | -0.240379 |
| C | 1.778842  | -1.658815 | 3.217377  | H | 1.461782  | -1.752069 | -2.123655 |
| C | 2.311261  | -0.771504 | 4.147121  | H | -1.059967 | -1.563562 | -2.483522 |
| C | 3.033764  | 0.323574  | 3.702377  | H | 4.083281  | -2.420622 | 0.969615  |
| C | 3.232936  | 0.535255  | 2.340619  | H | 5.699961  | -3.894774 | -0.072326 |
| C | 3.000207  | 1.360163  | -0.467354 | H | 6.635030  | -3.309377 | -2.291981 |
| C | 2.043955  | 1.948671  | -1.301734 | H | 5.698638  | -1.373143 | -3.535503 |
| C | 2.128038  | 3.284977  | -1.657100 | H | 4.072502  | 0.071160  | -2.438539 |
| C | 3.170146  | 4.071211  | -1.175891 | H | 3.780463  | 1.410928  | 2.019275  |
| C | 4.119545  | 3.501377  | -0.343170 | H | 3.439843  | 1.033141  | 4.414217  |
| C | 4.035503  | 2.156610  | 0.007416  | H | 2.152188  | -0.929522 | 5.207647  |
| C | 0.888707  | -1.002823 | -1.592321 | H | 1.200722  | -2.514522 | 3.547315  |
| C | -0.553117 | -0.897683 | -1.796326 | H | 1.543142  | -2.135543 | 1.146876  |
| C | -1.199336 | 0.021970  | -1.044223 | H | 1.220975  | 1.348873  | -1.674498 |
| C | -2.680878 | 0.126135  | -0.692276 | H | 1.374304  | 3.715703  | -2.306631 |
| C | -3.125235 | 1.586482  | -0.483821 | H | 3.236934  | 5.118411  | -1.448170 |
| C | -2.262979 | 2.668645  | -0.606374 | H | 4.939119  | 4.099174  | 0.039118  |
| C | -2.723915 | 3.970952  | -0.431717 | H | 4.802934  | 1.741762  | 0.644974  |
| C | -4.055365 | 4.209165  | -0.133137 | H | -4.141399 | -1.744519 | 0.815896  |
| C | -4.931451 | 3.133552  | -0.018762 | H | -5.343000 | -3.720404 | 0.007454  |
| C | -4.470845 | 1.840294  | -0.199304 | H | -5.343542 | -4.290917 | -2.404820 |
| C | -2.777447 | -0.456290 | 0.737565  | H | -4.142341 | -2.817941 | -4.004336 |
| C | -2.846729 | 0.337755  | 1.876685  | H | -2.961474 | -0.821945 | -3.194842 |
| C | -2.849858 | -0.237201 | 3.145115  | H | -2.872949 | 1.415236  | 1.787379  |
| C | -2.780803 | -1.612319 | 3.295516  | H | -2.893776 | 0.404338  | 4.017744  |

|                 |           |           |           |   |           |           |           |
|-----------------|-----------|-----------|-----------|---|-----------|-----------|-----------|
| H               | -2.778470 | -2.056215 | 4.284429  | C | 3.444403  | -1.154238 | -0.720796 |
| H               | -2.628202 | -3.495275 | 2.264204  | C | 2.749766  | -2.271703 | -1.164433 |
| H               | -2.597355 | -2.479439 | 0.029043  | C | 3.385935  | -3.241350 | -1.935917 |
| H               | -5.164328 | 1.009642  | -0.123318 | C | 4.723366  | -3.107438 | -2.270032 |
| H               | -5.978571 | 3.304516  | 0.204343  | C | 5.430517  | -1.994164 | -1.823782 |
| H               | -4.413265 | 5.223141  | 0.004345  | C | 4.797626  | -1.033856 | -1.053341 |
| H               | -2.030243 | 4.798276  | -0.529070 | C | 3.649092  | -0.075773 | 1.468884  |
| H               | -1.219206 | 2.513671  | -0.843004 | C | 3.680283  | -1.249659 | 2.229624  |
|                 |           |           |           | C | 4.447334  | -1.339498 | 3.379440  |
| <b>8FH</b>      |           |           |           | C | 5.223513  | -0.259372 | 3.788223  |
| 77              |           |           |           | C | 5.226648  | 0.897903  | 3.026594  |
| E: -2036.718486 |           |           |           | C | 4.446985  | 0.988888  | 1.875938  |
| C               | -4.449727 | 0.988559  | 1.873783  | C | 2.776476  | 1.306285  | -0.531232 |
| C               | -3.650336 | -0.075502 | 1.468015  | C | 2.300754  | 2.416245  | 0.176989  |
| C               | -3.681084 | -1.249014 | 2.229334  | C | 2.105433  | 3.635776  | -0.448971 |
| C               | -4.449136 | -1.339028 | 3.378481  | C | 2.367336  | 3.771657  | -1.809240 |
| C               | -5.226804 | -0.259503 | 3.785969  | C | 2.826996  | 2.677553  | -2.523945 |
| C               | -5.230393 | 0.897374  | 3.023725  | C | 3.029947  | 1.453439  | -1.891046 |
| C               | -2.814228 | -0.070498 | 0.171907  | C | -3.443894 | -1.153982 | -0.721318 |
| C               | -2.776331 | 1.306778  | -0.531465 | C | -2.749456 | -2.272970 | -1.161395 |
| C               | -3.027064 | 1.453565  | -1.891839 | C | -3.384785 | -3.243214 | -1.932795 |
| C               | -2.822908 | 2.677531  | -2.524620 | C | -4.721265 | -3.108346 | -2.270325 |
| C               | -2.364708 | 3.771817  | -1.809246 | C | -5.428274 | -1.993589 | -1.827548 |
| C               | -2.105510 | 3.636277  | -0.448430 | C | -4.796188 | -1.032674 | -1.057207 |
| C               | -2.302038 | 2.416890  | 0.177450  | H | 1.278393  | -0.471603 | 2.603305  |
| C               | -1.336081 | -0.323578 | 0.472793  | H | -1.278713 | -0.471303 | 2.603508  |
| C               | -0.738781 | -0.434686 | 1.664471  | H | 4.481264  | 1.898821  | 1.291155  |
| C               | 0.738344  | -0.434992 | 1.664332  | H | 5.842360  | 1.740986  | 3.319569  |
| C               | 1.335636  | -0.324364 | 0.472572  | H | 5.829489  | -0.328313 | 4.684367  |
| P               | -0.000303 | -0.141252 | -0.779784 | H | 4.450695  | -2.260500 | 3.951529  |
| O               | -0.000880 | -1.012034 | -1.988906 | H | 3.107964  | -2.110204 | 1.900635  |
| C               | 2.813892  | -0.071033 | 0.172198  | H | 3.360513  | 0.604941  | -2.475476 |

|                 |           |           |           |   |           |           |           |
|-----------------|-----------|-----------|-----------|---|-----------|-----------|-----------|
| H               | 3.020484  | 2.763499  | -3.587023 | C | -3.691908 | -0.931609 | -5.862920 |
| H               | 2.202940  | 4.721094  | -2.305699 | C | -4.249358 | 0.336483  | -5.982050 |
| H               | 1.733238  | 4.479032  | 0.121847  | C | -4.343101 | 1.140376  | -4.856922 |
| H               | 2.054487  | 2.311690  | 1.227936  | C | -2.849041 | -1.151756 | -2.125389 |
| H               | 1.699532  | -2.393130 | -0.938328 | C | -3.955884 | -2.039958 | -1.516655 |
| H               | 2.820711  | -4.100329 | -2.278913 | C | -5.104418 | -2.405058 | -2.211158 |
| H               | 5.216322  | -3.862697 | -2.871651 | C | -6.056355 | -3.238888 | -1.627455 |
| H               | 6.479724  | -1.878897 | -2.071660 | C | -5.874411 | -3.722644 | -0.342033 |
| H               | 5.359775  | -0.176693 | -0.697947 | C | -4.734520 | -3.356431 | 0.367474  |
| H               | -4.484398 | 1.898173  | 1.288538  | C | -3.795030 | -2.520020 | -0.211894 |
| H               | -5.847260 | 1.739972  | 3.315666  | C | -2.586306 | -0.007167 | -1.134803 |
| H               | -5.833577 | -0.328616 | 4.681560  | C | -3.560690 | 0.572901  | -0.408247 |
| H               | -4.452120 | -2.259749 | 3.951024  | C | -3.174264 | 1.756491  | 0.340247  |
| H               | -3.107746 | -2.109245 | 1.901314  | C | -1.884548 | 2.138934  | 0.251105  |
| H               | -3.356263 | 0.604854  | -2.476730 | C | -1.368375 | 3.413418  | 0.946037  |
| H               | -3.014226 | 2.763204  | -3.588111 | C | -1.760700 | 3.220238  | 2.428705  |
| H               | -2.199296 | 4.721131  | -2.305601 | C | -2.893649 | 3.823260  | 2.973474  |
| H               | -1.734443 | 4.479685  | 0.122896  | C | -3.288340 | 3.555102  | 4.281087  |
| H               | -2.057790 | 2.312551  | 1.228891  | C | -2.551319 | 2.685273  | 5.071535  |
| H               | -5.358235 | -0.174314 | -0.704542 | C | -1.424777 | 2.073399  | 4.535455  |
| H               | -6.476766 | -1.877617 | -2.078103 | C | -1.040588 | 2.326998  | 3.227326  |
| H               | -5.213620 | -3.864050 | -2.871873 | P | -1.176393 | 1.154754  | -1.115169 |
| H               | -2.819723 | -4.103401 | -2.273011 | O | 0.131060  | 0.288846  | -0.587018 |
| H               | -1.700034 | -2.395315 | -0.932001 | P | 1.132870  | -0.212144 | 0.561843  |
| H               | 0.000155  | 1.246341  | -1.039862 | C | 2.590157  | -0.706248 | -0.488690 |
|                 |           |           |           | C | 2.370309  | -2.010964 | -0.699756 |
| {8F}2           |           |           |           | C | 1.352908  | -2.690491 | 0.116579  |
| 152             |           |           |           | C | 0.636870  | -1.935995 | 0.954858  |
| E= -4072.288732 |           |           |           | C | 0.008836  | -2.472461 | 2.257179  |
| C               | -3.885051 | 0.684625  | -3.624408 | C | 0.017001  | -4.011343 | 2.174130  |
| C               | -3.318912 | -0.579783 | -3.490337 | C | 0.745388  | -4.824148 | 3.033096  |
| C               | -3.230414 | -1.379601 | -4.634724 | C | 0.691752  | -6.212428 | 2.913564  |

|   |           |           |           |   |           |           |           |
|---|-----------|-----------|-----------|---|-----------|-----------|-----------|
| C | -0.089881 | -6.804877 | 1.935122  | C | -3.107997 | -0.293194 | 2.781561  |
| C | -0.830388 | -5.998766 | 1.073683  | C | -1.868523 | -0.727506 | 2.327852  |
| C | -0.777717 | -4.621536 | 1.197810  | C | 3.770883  | 0.066721  | -1.141631 |
| C | 0.143966  | 3.660050  | 0.748970  | C | 4.586926  | -0.997841 | -1.922222 |
| C | 1.006350  | 3.980376  | 1.795316  | C | 4.522946  | -1.125612 | -3.305865 |
| C | 2.340240  | 4.284216  | 1.555963  | C | 5.204425  | -2.148112 | -3.963385 |
| C | 2.839515  | 4.292609  | 0.262919  | C | 5.963915  | -3.059400 | -3.247883 |
| C | 1.978786  | 4.025068  | -0.791583 | C | 6.039853  | -2.941017 | -1.862840 |
| C | 0.648654  | 3.721776  | -0.549966 | C | 5.359413  | -1.925049 | -1.212878 |
| C | -2.028567 | 4.685757  | 0.355045  | C | 3.305077  | 1.139198  | -2.147760 |
| C | -1.745927 | 5.916046  | 0.958762  | C | 4.180132  | 2.132913  | -2.591575 |
| C | -2.266749 | 7.096799  | 0.458891  | C | 3.826025  | 2.984129  | -3.628964 |
| C | -3.073182 | 7.082342  | -0.676004 | C | 2.576645  | 2.881504  | -4.231329 |
| C | -3.343726 | 5.874244  | -1.295902 | C | 1.690369  | 1.912515  | -3.783957 |
| C | -2.826845 | 4.686091  | -0.782821 | C | 2.062427  | 1.045196  | -2.763182 |
| O | 1.244443  | 0.719534  | 1.705202  | C | 4.690858  | 0.725756  | -0.081542 |
| C | -1.576856 | -1.991734 | -2.402829 | C | 6.062485  | 0.861531  | -0.333325 |
| C | -1.479488 | -3.348745 | -2.111341 | C | 6.903872  | 1.501682  | 0.564709  |
| C | -0.349992 | -4.082858 | -2.465839 | C | 6.397069  | 2.019806  | 1.750323  |
| C | 0.700543  | -3.475883 | -3.133683 | C | 5.040970  | 1.899465  | 2.007657  |
| C | 0.611637  | -2.123227 | -3.446893 | C | 4.195445  | 1.269990  | 1.099365  |
| C | -0.512732 | -1.398918 | -3.089570 | H | 1.335560  | -3.772270 | 0.119416  |
| C | 0.947654  | -1.956933 | 3.384675  | H | 2.962776  | -2.611899 | -1.374064 |
| C | 0.453872  | -1.390355 | 4.557037  | H | -4.584885 | 0.216211  | -0.392186 |
| C | 1.316914  | -0.908075 | 5.535114  | H | -3.911282 | 2.310889  | 0.912322  |
| C | 2.690551  | -0.979061 | 5.360943  | H | -0.613176 | -1.306162 | 4.714874  |
| C | 3.196846  | -1.553610 | 4.202020  | H | 0.904880  | -0.466672 | 6.436127  |
| C | 2.334780  | -2.037387 | 3.230279  | H | 3.361231  | -0.588539 | 6.117751  |
| C | -1.430398 | -2.023566 | 2.570215  | H | 4.267562  | -1.612862 | 4.043593  |
| C | -2.286222 | -2.879296 | 3.274997  | H | 2.754347  | -2.473503 | 2.331877  |
| C | -3.532453 | -2.453923 | 3.710320  | H | 1.355595  | -4.382463 | 3.810350  |
| C | -3.950611 | -1.152351 | 3.466356  | H | 1.266118  | -6.827488 | 3.597270  |

|   |           |           |           |           |              |           |           |
|---|-----------|-----------|-----------|-----------|--------------|-----------|-----------|
| H | -0.129953 | -7.884448 | 1.844664  | H         | -0.006080    | 3.565011  | -1.399143 |
| H | -1.456638 | -6.445210 | 0.308883  | H         | -1.104643    | 5.943234  | 1.832610  |
| H | -1.361710 | -4.001130 | 0.528610  | H         | -2.036306    | 8.034846  | 0.951433  |
| H | -1.971829 | -3.888258 | 3.506291  | H         | -3.477198    | 8.006600  | -1.073118 |
| H | -4.170638 | -3.141611 | 4.254555  | H         | -3.959588    | 5.845225  | -2.188042 |
| H | -4.915963 | -0.807443 | 3.818240  | H         | -3.051501    | 3.757628  | -1.291343 |
| H | -3.397277 | 0.737214  | 2.620927  | H         | -5.273538    | -2.040783 | -3.215891 |
| H | -1.232653 | -0.013640 | 1.822288  | H         | -6.944385    | -3.505614 | -2.189668 |
| H | 3.939282  | -0.425559 | -3.889606 | H         | -6.615261    | -4.373088 | 0.109185  |
| H | 5.138770  | -2.221906 | -5.043188 | H         | -4.572213    | -3.711587 | 1.378219  |
| H | 6.496373  | -3.852840 | -3.759911 | H         | -2.924983    | -2.227523 | 0.363423  |
| H | 6.630854  | -3.644461 | -1.287078 | H         | -2.298778    | -3.858357 | -1.622595 |
| H | 5.418690  | -1.848697 | -0.133148 | H         | -0.303754    | -5.137655 | -2.217993 |
| H | 6.488034  | 0.458706  | -1.244132 | H         | 1.579670     | -4.044629 | -3.415842 |
| H | 7.960359  | 1.588562  | 0.336090  | H         | 1.422776     | -1.631914 | -3.972606 |
| H | 7.052972  | 2.511792  | 2.459935  | H         | -0.586114    | -0.358290 | -3.388200 |
| H | 4.616644  | 2.300893  | 2.921123  | H         | -2.796609    | -2.369995 | -4.562629 |
| H | 3.143997  | 1.234221  | 1.344448  | H         | -3.611575    | -1.575946 | -6.731235 |
| H | 5.153250  | 2.245173  | -2.132681 | H         | -4.603594    | 0.692290  | -6.942789 |
| H | 4.528642  | 3.740566  | -3.960607 | H         | -4.772562    | 2.133262  | -4.930777 |
| H | 2.297226  | 3.554371  | -5.033975 | H         | -3.976024    | 1.332691  | -2.763062 |
| H | 0.705906  | 1.819997  | -4.230085 |           |              |           |           |
| H | 1.379322  | 0.273861  | -2.447480 | <b>8G</b> |              |           |           |
| H | -3.481446 | 4.510923  | 2.377576  | 76        |              |           |           |
| H | -4.174795 | 4.036668  | 4.679205  | E=        | -2538.960308 |           |           |
| H | -2.855616 | 2.480079  | 6.091778  | O         | 0.000138     | 2.046813  | 0.249328  |
| H | -0.843009 | 1.374836  | 5.126628  | P         | 0.000032     | 0.604506  | -0.116913 |
| H | -0.177620 | 1.810762  | 2.821074  | C         | 1.341341     | -0.455293 | -0.422045 |
| H | 0.648016  | 3.991119  | 2.815053  | Si        | 3.172543     | -0.109908 | -0.148776 |
| H | 2.992349  | 4.509481  | 2.392590  | C         | 3.551641     | -0.933806 | 1.532170  |
| H | 3.885964  | 4.506230  | 0.077252  | C         | -1.341327    | -0.455170 | -0.422138 |
| H | 2.336525  | 4.058187  | -1.811432 | Si        | -3.172529    | -0.109822 | -0.148876 |

|   |           |           |           |   |           |           |           |
|---|-----------|-----------|-----------|---|-----------|-----------|-----------|
| C | -3.562176 | 1.757628  | -0.054515 | C | 2.816857  | 4.064149  | -0.119964 |
| C | -0.723261 | -1.649388 | -0.735083 | C | 2.531161  | 2.695299  | -0.187988 |
| C | 0.723246  | -1.649448 | -0.734995 | H | 5.681258  | 1.459338  | 0.246762  |
| H | 1.280064  | -2.552200 | -0.957949 | H | 6.189186  | 3.892957  | 0.367700  |
| H | -1.280174 | -2.552090 | -0.958033 | H | 4.355940  | 5.560063  | 0.132992  |
| C | 4.216009  | -0.911353 | -1.533321 | H | 2.014766  | 4.793550  | -0.222654 |
| C | 3.562315  | 1.757594  | -0.055971 | H | 1.506838  | 2.359931  | -0.343592 |
| C | -4.215961 | -0.910210 | -1.534058 | C | -5.609591 | -0.777031 | -1.526431 |
| C | -3.551832 | -0.935031 | 1.531380  | C | -6.374411 | -1.363703 | -2.541748 |
| C | 5.609653  | -0.778322 | -1.525664 | C | -5.745600 | -2.083553 | -3.564691 |
| C | 6.374496  | -1.365768 | -2.540514 | C | -4.351970 | -2.216732 | -3.572317 |
| C | 5.745696  | -2.086245 | -3.563022 | C | -3.587150 | -1.630060 | -2.557001 |
| C | 4.352052  | -2.219276 | -3.570680 | H | -6.098716 | -0.217090 | -0.730727 |
| C | 3.587208  | -1.631830 | -2.555829 | H | -7.458456 | -1.260108 | -2.535815 |
| H | 6.098770  | -0.217894 | -0.730298 | H | -6.340521 | -2.539900 | -4.354462 |
| H | 7.458553  | -1.262290 | -2.534557 | H | -3.862845 | -2.776673 | -4.368021 |
| H | 6.340635  | -2.543195 | -4.352430 | H | -2.503105 | -1.733654 | -2.562933 |
| H | 3.862935  | -2.779704 | -4.366045 | C | -4.845705 | -0.878004 | 2.063019  |
| H | 2.503152  | -1.735309 | -2.561786 | C | -5.123728 | -1.482869 | 3.294620  |
| C | 4.845470  | -0.876440 | 2.063880  | C | -4.107878 | -2.144760 | 3.994583  |
| C | 5.123342  | -1.480345 | 3.295987  | C | -2.814004 | -2.201787 | 3.462944  |
| C | 4.107386  | -2.141615 | 3.996383  | C | -2.535981 | -1.596922 | 2.231343  |
| C | 2.813557  | -2.198981 | 3.464672  | H | -5.635892 | -0.363147 | 1.518547  |
| C | 2.535685  | -1.595076 | 2.232566  | H | -6.130177 | -1.438511 | 3.708159  |
| H | 5.635739  | -0.362067 | 1.519072  | H | -4.324140 | -2.615259 | 4.952592  |
| H | 6.129756  | -1.435722 | 3.709582  | H | -2.023818 | -2.716644 | 4.007415  |
| H | 4.323531  | -2.611366 | 4.954786  | H | -1.529533 | -1.641281 | 1.817804  |
| H | 2.023288  | -2.713354 | 4.009480  | C | -4.879029 | 2.188698  | 0.145681  |
| H | 1.529271  | -1.639699 | 1.818971  | C | -5.164634 | 3.557509  | 0.214846  |
| C | 4.879167  | 2.188739  | 0.144072  | C | -4.133387 | 4.495252  | 0.083815  |
| C | 5.164864  | 3.557588  | 0.212096  | C | -2.816535 | 4.064182  | -0.116381 |
| C | 4.133709  | 4.495294  | 0.080079  | C | -2.530929 | 2.695370  | -0.185546 |

|                 |           |           |           |   |           |           |           |
|-----------------|-----------|-----------|-----------|---|-----------|-----------|-----------|
| H               | -5.681192 | 1.459268  | 0.247605  | C | 3.008470  | 2.539208  | -1.211543 |
| H               | -6.188957 | 3.892820  | 0.370571  | P | 0.000013  | 0.654675  | 0.343437  |
| H               | -4.355548 | 5.559992  | 0.137616  | O | 0.000056  | 2.129399  | 0.109413  |
| H               | -2.014372 | 4.793612  | -0.218305 | C | 3.459695  | 0.162924  | 1.723141  |
| H               | -1.506606 | 2.360060  | -0.341271 | C | 4.282577  | 1.190155  | 2.193646  |
|                 |           |           |           | C | 4.490973  | 1.370769  | 3.556387  |
| <b>8GH</b>      |           |           |           | C | 3.878226  | 0.525442  | 4.472289  |
| 77              |           |           |           | C | 3.054017  | -0.501154 | 4.024355  |
| E: -2539.589636 |           |           |           | C | 2.847399  | -0.676827 | 2.662575  |
| C               | -3.008305 | 2.539297  | -1.211380 | C | 4.049394  | -1.657310 | -0.709368 |
| C               | -3.783434 | 1.378041  | -1.089624 | C | 4.665583  | -2.549374 | 0.172905  |
| C               | -5.062413 | 1.366989  | -1.659832 | C | 5.271317  | -3.712122 | -0.291220 |
| C               | -5.556089 | 2.478851  | -2.331541 | C | 5.269873  | -4.003009 | -1.649178 |
| C               | -4.774686 | 3.622046  | -2.445156 | C | 4.666009  | -3.126255 | -2.544093 |
| C               | -3.502820 | 3.649570  | -1.885276 | C | 4.064503  | -1.965124 | -2.076715 |
| Si              | -3.179911 | -0.101968 | -0.114214 | C | -4.049456 | -1.657182 | -0.709529 |
| C               | -3.459634 | 0.162732  | 1.723152  | C | -4.665811 | -2.549208 | 0.172670  |
| C               | -4.282444 | 1.189965  | 2.193777  | C | -5.271685 | -3.711846 | -0.291548 |
| C               | -4.490839 | 1.370425  | 3.556540  | C | -5.270216 | -4.002660 | -1.649522 |
| C               | -3.878151 | 0.524950  | 4.472342  | C | -4.666190 | -3.125941 | -2.544361 |
| C               | -3.054007 | -0.501647 | 4.024288  | C | -4.064547 | -1.964919 | -2.076892 |
| C               | -2.847397 | -0.677172 | 2.662489  | H | 1.290936  | -2.254028 | -1.359015 |
| C               | -1.337745 | -0.371516 | -0.337094 | H | -1.290906 | -2.254000 | -1.359090 |
| C               | -0.741442 | -1.427557 | -0.916826 | H | 4.679138  | -2.331654 | 1.236276  |
| C               | 0.741454  | -1.427585 | -0.916772 | H | 5.747348  | -4.389830 | 0.408769  |
| C               | 1.337764  | -0.371586 | -0.336965 | H | 5.742672  | -4.908991 | -2.011921 |
| Si              | 3.179945  | -0.101992 | -0.114189 | H | 4.668864  | -3.345514 | -3.606088 |
| C               | 3.783500  | 1.377885  | -1.089781 | H | 3.609139  | -1.281314 | -2.787832 |
| C               | 5.062424  | 1.366676  | -1.660109 | H | 4.757888  | 1.863271  | 1.486977  |
| C               | 5.556140  | 2.478445  | -2.331942 | H | 5.128454  | 2.176326  | 3.903226  |
| C               | 4.774839  | 3.621708  | -2.445555 | H | 4.037794  | 0.668518  | 5.535254  |
| C               | 3.503029  | 3.649391  | -1.885552 | H | 2.570205  | -1.160277 | 4.736684  |



|                          |           |           |           |    |           |           |           |
|--------------------------|-----------|-----------|-----------|----|-----------|-----------|-----------|
| H                        | 2.196307  | -1.479385 | 2.325134  | O  | -1.328889 | -1.382632 | 1.544488  |
| H                        | 5.681025  | 0.477449  | -1.583975 | C  | 1.925323  | 1.495472  | -0.680976 |
| H                        | 6.548697  | 2.450808  | -2.767973 | Si | 1.844733  | 2.746542  | -2.101172 |
| H                        | 5.156501  | 4.490172  | -2.971452 | C  | 2.808774  | 1.849642  | -3.484753 |
| H                        | 2.889344  | 4.538993  | -1.973333 | C  | -1.470824 | 1.404628  | 1.312062  |
| H                        | 2.011229  | 2.586369  | -0.781238 | Si | -1.121169 | 1.961953  | 3.096587  |
| H                        | -4.679390 | -2.331544 | 1.236050  | C  | -2.874131 | 2.300658  | 3.775190  |
| H                        | -5.747846 | -4.389526 | 0.408380  | C  | -2.787230 | -0.057046 | -0.544083 |
| H                        | -5.743122 | -4.908558 | -2.012337 | Si | -3.693075 | -1.391169 | -1.526690 |
| H                        | -4.669029 | -3.345143 | -3.606368 | C  | -2.817586 | -2.015238 | -3.105347 |
| H                        | -3.609064 | -1.281126 | -2.787949 | C  | -2.423866 | 2.026346  | 0.593051  |
| H                        | -4.757704 | 1.863200  | 1.487188  | H  | -2.785491 | 3.022385  | 0.830872  |
| H                        | -5.128273 | 2.175980  | 3.903471  | C  | -3.131386 | 1.235641  | -0.438327 |
| H                        | -4.037714 | 0.667908  | 5.535325  | H  | -3.929372 | 1.696679  | -1.009059 |
| H                        | -2.570239 | -1.160885 | 4.736540  | C  | 2.911236  | 1.480531  | 0.245188  |
| H                        | -2.196366 | -1.479740 | 2.324955  | H  | 3.555788  | 2.331212  | 0.451264  |
| H                        | -5.681085 | 0.477810  | -1.583707 | C  | 3.194756  | 0.189467  | 0.873627  |
| H                        | -6.548691 | 2.451337  | -2.767478 | H  | 4.029613  | 0.100201  | 1.560786  |
| H                        | -5.156315 | 4.490580  | -2.970962 | C  | 4.931424  | -2.681296 | 0.786818  |
| H                        | -2.889056 | 4.539117  | -1.973062 | C  | 2.429604  | -3.626393 | 2.261367  |
| H                        | -2.011024 | 2.586335  | -0.781156 | C  | 0.124819  | 3.162598  | -2.820125 |
| H                        | -0.000075 | 0.284659  | 1.712397  | C  | 2.883458  | 4.301366  | -1.711721 |
|                          |           |           |           | C  | -4.060661 | -2.787760 | -0.276686 |
| <b>{8G}</b> <sub>2</sub> |           |           |           | C  | -5.373182 | -0.671131 | -2.080663 |
| 152                      |           |           |           | C  | -0.359509 | 0.653723  | 4.261279  |
| E= -5078.052482          |           |           |           | C  | -0.111170 | 3.580559  | 3.186689  |
| P                        | 1.431071  | -0.244573 | -0.912698 | C  | -3.041389 | 2.741007  | 5.093567  |
| C                        | 2.451789  | -0.869178 | 0.470734  | C  | -4.326283 | 2.989273  | 5.590972  |
| Si                       | 3.022795  | -2.675626 | 0.714672  | C  | -5.443919 | 2.797189  | 4.770001  |
| C                        | 2.562532  | -3.733333 | -0.807666 | C  | -5.276661 | 2.356840  | 3.451624  |
| O                        | -0.189753 | -0.341529 | -0.538403 | C  | -3.991767 | 2.108575  | 2.954218  |
| P                        | -1.359065 | -0.257871 | 0.575617  | H  | -2.172028 | 2.890421  | 5.732165  |

|   |           |           |           |   |           |           |           |
|---|-----------|-----------|-----------|---|-----------|-----------|-----------|
| H | -4.456386 | 3.331802  | 6.616481  | H | -7.223713 | 2.187392  | -1.870654 |
| H | -6.443383 | 2.990304  | 5.156911  | H | -5.034296 | 1.249081  | -1.148749 |
| H | -6.146022 | 2.207426  | 2.813025  | C | -4.734122 | -3.941821 | -0.694530 |
| H | -3.861664 | 1.766046  | 1.928710  | C | -5.003557 | -4.965501 | 0.221704  |
| C | 0.229649  | 4.124654  | 4.430796  | C | -4.599531 | -4.835120 | 1.555781  |
| C | 0.969962  | 5.311067  | 4.496839  | C | -3.926070 | -3.681060 | 1.973626  |
| C | 1.369456  | 5.953384  | 3.318776  | C | -3.656635 | -2.657380 | 1.057392  |
| C | 1.028637  | 5.409288  | 2.074669  | H | -5.048397 | -4.043239 | -1.732252 |
| C | 0.288324  | 4.222875  | 2.008625  | H | -5.527414 | -5.863196 | -0.103319 |
| H | -0.081101 | 3.625024  | 5.347161  | H | -4.809113 | -5.631397 | 2.268480  |
| H | 1.235071  | 5.734296  | 5.464577  | H | -3.611796 | -3.579642 | 3.011348  |
| H | 1.945314  | 6.876243  | 3.370148  | H | -3.132779 | -1.759685 | 1.382415  |
| H | 1.339387  | 5.908918  | 1.158304  | C | -3.417856 | -3.003697 | -3.894412 |
| H | 0.023215  | 3.799647  | 1.040888  | C | -2.776136 | -3.461130 | -5.051543 |
| C | -0.071584 | 0.983296  | 5.591121  | C | -1.534146 | -2.930103 | -5.419608 |
| C | 0.486700  | 0.024384  | 6.444822  | C | -0.933876 | -1.941644 | -4.630543 |
| C | 0.757061  | -1.264101 | 5.968681  | C | -1.575596 | -1.484211 | -3.473412 |
| C | 0.469136  | -1.593675 | 4.638838  | H | -4.383947 | -3.416760 | -3.608110 |
| C | -0.089149 | -0.634762 | 3.785137  | H | -3.243061 | -4.230010 | -5.665323 |
| H | -0.281886 | 1.985554  | 5.961491  | H | -1.034980 | -3.285920 | -6.319690 |
| H | 0.710665  | 0.280745  | 7.479250  | H | 0.032214  | -1.528581 | -4.916845 |
| H | 1.191327  | -2.009998 | 6.632738  | H | -1.108672 | -0.715331 | -2.859632 |
| H | 0.679438  | -2.595932 | 4.268469  | C | 3.337104  | -3.942697 | 3.279402  |
| H | -0.313113 | -0.891123 | 2.750710  | C | 2.902304  | -4.639595 | 4.413106  |
| C | -6.256481 | -1.454341 | -2.833236 | C | 1.560004  | -5.020187 | 4.528774  |
| C | -7.487973 | -0.926564 | -3.239289 | C | 0.652504  | -4.703883 | 3.510739  |
| C | -7.836167 | 0.384422  | -2.892769 | C | 1.087304  | -4.006986 | 2.377036  |
| C | -6.952868 | 1.167632  | -2.140197 | H | 4.381222  | -3.646651 | 3.189428  |
| C | -5.721376 | 0.639856  | -1.734143 | H | 3.608210  | -4.885634 | 5.204991  |
| H | -5.985636 | -2.474101 | -3.102778 | H | 1.221792  | -5.562274 | 5.410633  |
| H | -8.175053 | -1.535790 | -3.824683 | H | -0.391614 | -4.999930 | 3.600713  |
| H | -8.794091 | 0.794957  | -3.208621 | H | 0.381398  | -3.760946 | 1.585150  |

|   |           |           |           |                 |           |           |           |
|---|-----------|-----------|-----------|-----------------|-----------|-----------|-----------|
| C | 2.889852  | -5.094162 | -0.839391 | C               | -2.396521 | 3.772523  | -3.874087 |
| C | 2.552487  | -5.869444 | -1.955242 | C               | -2.280386 | 2.854418  | -2.823565 |
| C | 1.887800  | -5.283898 | -3.039367 | C               | -1.019717 | 2.549456  | -2.296584 |
| C | 1.560480  | -3.923069 | -3.007642 | H               | 0.898970  | 4.557640  | -4.277886 |
| C | 1.897846  | -3.147786 | -1.891792 | H               | -1.342321 | 5.099820  | -5.214784 |
| H | 3.406883  | -5.549633 | 0.003903  | H               | -3.377142 | 4.009741  | -4.284003 |
| H | 2.807095  | -6.927974 | -1.979919 | H               | -3.170672 | 2.377481  | -2.416325 |
| H | 1.625378  | -5.886956 | -3.907339 | H               | -0.929381 | 1.835301  | -1.479428 |
| H | 1.043449  | -3.467597 | -3.850937 | C               | 2.976904  | 2.463365  | -4.731780 |
| H | 1.643237  | -2.089256 | -1.867114 | C               | 3.683531  | 1.805951  | -5.745924 |
| C | 5.621755  | -3.886719 | 0.961174  | C               | 4.222027  | 0.534816  | -5.513039 |
| C | 7.020750  | -3.890875 | 1.014056  | C               | 4.053897  | -0.078907 | -4.266012 |
| C | 7.729413  | -2.689609 | 0.892582  | C               | 3.347271  | 0.578507  | -3.251869 |
| C | 7.039082  | -1.484186 | 0.718226  | H               | 2.558030  | 3.452127  | -4.912931 |
| C | 5.640087  | -1.480030 | 0.665344  | H               | 3.814312  | 2.283340  | -6.715933 |
| H | 5.070516  | -4.821132 | 1.055663  | H               | 4.771682  | 0.023442  | -6.301898 |
| H | 7.557729  | -4.828521 | 1.149680  | H               | 4.472771  | -1.067669 | -4.084862 |
| H | 8.817631  | -2.692841 | 0.933717  | H               | 3.216489  | 0.101118  | -2.281860 |
| H | 7.590321  | -0.549773 | 0.623737  |                 |           |           |           |
| H | 5.103108  | -0.542384 | 0.529721  | <b>8H</b>       |           |           |           |
| C | 2.953082  | 5.347222  | -2.639804 | 214             |           |           |           |
| C | 3.714451  | 6.486884  | -2.354342 | E= -7055.664511 |           |           |           |
| C | 4.406197  | 6.580689  | -1.140798 | C               | -5.831539 | 0.007133  | -2.268525 |
| C | 4.336573  | 5.534833  | -0.212716 | Si              | -3.948518 | 0.173431  | -2.138581 |
| C | 3.575204  | 4.395171  | -0.498177 | C               | -3.614138 | 1.871661  | -2.908562 |
| H | 2.415003  | 5.274255  | -3.583768 | C               | -3.263177 | -1.229549 | -3.214099 |
| H | 3.768609  | 7.300411  | -3.076258 | Si              | -3.267939 | 0.029165  | 0.169452  |
| H | 4.998433  | 7.467183  | -0.918750 | Si              | -3.771214 | -2.153682 | 1.058289  |
| H | 4.874652  | 5.607800  | 0.731248  | C               | -3.141085 | -3.418804 | -0.188167 |
| H | 3.521046  | 3.581645  | 0.223738  | Si              | -4.052000 | 1.887182  | 1.438347  |
| C | 0.008685  | 4.080703  | -3.870647 | C               | -3.247660 | 1.992874  | 3.150919  |
| C | -1.251985 | 4.385666  | -4.397628 | C               | -1.390534 | 0.085401  | 0.442736  |

|    |           |           |           |   |           |           |           |
|----|-----------|-----------|-----------|---|-----------|-----------|-----------|
| C  | -0.761774 | -0.150515 | 1.652714  | H | -0.546399 | -3.948513 | -2.327509 |
| H  | -1.294629 | -0.264813 | 2.583756  | H | -1.397247 | -2.285885 | -0.761110 |
| C  | -3.558151 | 3.523474  | 0.645199  | C | -1.586438 | -3.070213 | 2.646917  |
| C  | -5.922223 | 1.791188  | 1.633102  | C | -0.701745 | -3.035619 | 3.719413  |
| P  | -0.049286 | 0.306702  | -0.633165 | C | -0.978918 | -2.234352 | 4.820181  |
| C  | 1.300454  | 0.007461  | 0.434519  | C | -2.154358 | -1.489823 | 4.852388  |
| Si | 3.159875  | 0.012134  | 0.106749  | C | -3.032806 | -1.533393 | 3.777265  |
| Si | 3.861818  | -2.289369 | 0.283167  | H | -1.343216 | -3.667921 | 1.776536  |
| C  | 4.093138  | -2.822476 | 2.084791  | H | 0.213290  | -3.618410 | 3.687286  |
| O  | -0.056304 | 0.451320  | -2.111529 | H | -0.279818 | -2.185990 | 5.647683  |
| C  | -2.759403 | -2.309527 | 2.644255  | H | -2.374913 | -0.849783 | 5.699235  |
| C  | -5.578738 | -2.548522 | 1.422658  | H | -3.916777 | -0.905000 | 3.810376  |
| C  | 0.674153  | -0.234557 | 1.638800  | C | -6.492584 | -2.665420 | 0.370339  |
| H  | 1.206238  | -0.487608 | 2.546121  | C | -7.827739 | -2.968886 | 0.600947  |
| Si | 3.506054  | 0.827075  | -2.110651 | C | -8.276882 | -3.180646 | 1.898316  |
| C  | 3.257060  | -0.528961 | -3.400694 | C | -7.380875 | -3.099212 | 2.957718  |
| Si | 4.186348  | 1.570558  | 1.663904  | C | -6.046920 | -2.789173 | 2.719818  |
| C  | 3.843906  | 3.341306  | 1.111459  | H | -6.161968 | -2.517062 | -0.651680 |
| C  | 2.382075  | 2.275296  | -2.544177 | H | -8.514262 | -3.034135 | -0.235636 |
| C  | 5.286667  | 1.441768  | -2.253124 | H | -9.318659 | -3.419349 | 2.082682  |
| C  | 3.585794  | 1.368289  | 3.454517  | H | -7.718676 | -3.284330 | 3.971718  |
| C  | 6.058180  | 1.327189  | 1.709714  | H | -5.361086 | -2.749948 | 3.559244  |
| C  | 2.581373  | -3.565394 | -0.287165 | C | -4.121992 | 4.701944  | 1.156270  |
| C  | 5.486355  | -2.598809 | -0.634199 | C | -3.770762 | 5.945829  | 0.652229  |
| C  | -3.817883 | -4.624947 | -0.397386 | C | -2.837091 | 6.038857  | -0.374834 |
| C  | -3.330380 | -5.574591 | -1.289261 | C | -2.248735 | 4.886940  | -0.875094 |
| C  | -2.155857 | -5.334111 | -1.988901 | C | -2.600601 | 3.643532  | -0.361957 |
| C  | -1.467076 | -4.144831 | -1.791663 | H | -4.843949 | 4.648509  | 1.966049  |
| C  | -1.955172 | -3.204464 | -0.900577 | H | -4.224900 | 6.842406  | 1.059907  |
| H  | -4.739288 | -4.828145 | 0.138506  | H | -2.569571 | 7.008089  | -0.781574 |
| H  | -3.873570 | -6.501505 | -1.438812 | H | -1.531160 | 4.940672  | -1.683164 |
| H  | -1.777049 | -6.070125 | -2.690311 | H | -2.124996 | 2.763054  | -0.777022 |

|   |           |           |           |   |           |           |           |
|---|-----------|-----------|-----------|---|-----------|-----------|-----------|
| C | -6.790736 | 2.700764  | 1.022025  | C | -8.611345 | -0.107677 | -2.688841 |
| C | -8.169030 | 2.563426  | 1.137080  | C | -7.738597 | -0.127895 | -3.774616 |
| C | -8.708558 | 1.505788  | 1.858215  | C | -6.370469 | -0.070736 | -3.564228 |
| C | -7.864403 | 0.577992  | 2.457616  | H | -6.362719 | 0.088651  | -0.183368 |
| C | -6.488639 | 0.726408  | 2.345628  | H | -8.763036 | -0.016379 | -0.544574 |
| H | -6.389334 | 3.521373  | 0.437152  | H | -9.682955 | -0.154120 | -2.850664 |
| H | -8.823160 | 3.279002  | 0.651471  | H | -8.127349 | -0.188804 | -4.785191 |
| H | -9.784415 | 1.396005  | 1.940951  | H | -5.705848 | -0.086968 | -4.422571 |
| H | -8.269831 | -0.269129 | 2.998795  | C | -4.064365 | -2.359633 | -3.432950 |
| H | -5.853206 | -0.027381 | 2.799067  | C | -3.665562 | -3.377009 | -4.287714 |
| C | -3.918163 | 1.751434  | 4.353308  | C | -2.446548 | -3.292850 | -4.948914 |
| C | -3.295429 | 1.957023  | 5.580164  | C | -1.623621 | -2.197857 | -4.725986 |
| C | -1.988664 | 2.424869  | 5.628473  | C | -2.025360 | -1.182588 | -3.865171 |
| C | -1.309997 | 2.688878  | 4.443573  | H | -5.025858 | -2.447938 | -2.939308 |
| C | -1.931889 | 2.469829  | 3.222984  | H | -4.307027 | -4.239177 | -4.431436 |
| H | -4.951362 | 1.421092  | 4.341055  | H | -2.136289 | -4.083057 | -5.624413 |
| H | -3.840214 | 1.769976  | 6.499383  | H | -0.662174 | -2.122256 | -5.222992 |
| H | -1.506775 | 2.602596  | 6.583991  | H | -1.344151 | -0.362495 | -3.691894 |
| H | -0.301644 | 3.086981  | 4.470199  | C | 2.816542  | -4.443682 | -1.348869 |
| H | -1.393269 | 2.702306  | 2.308668  | C | 2.035578  | -5.580563 | -1.532584 |
| C | -2.417578 | 2.240222  | -3.534912 | C | 1.009359  | -5.869285 | -0.646515 |
| C | -2.287781 | 3.475447  | -4.158043 | C | 0.736668  | -4.992554 | 0.396765  |
| C | -3.335947 | 4.386202  | -4.140574 | C | 1.503919  | -3.850097 | 0.565900  |
| C | -4.515652 | 4.057793  | -3.486810 | H | 3.640125  | -4.269959 | -2.030042 |
| C | -4.652978 | 2.813198  | -2.887658 | H | 2.250184  | -6.251260 | -2.357716 |
| H | -1.560825 | 1.578730  | -3.525895 | H | 0.409162  | -6.762982 | -0.772885 |
| H | -1.354901 | 3.722561  | -4.650243 | H | -0.078045 | -5.209496 | 1.077963  |
| H | -3.230624 | 5.350399  | -4.626198 | H | 1.288383  | -3.191045 | 1.402067  |
| H | -5.335552 | 4.766460  | -3.449084 | C | 6.686972  | -2.808593 | 0.054017  |
| H | -5.592946 | 2.571201  | -2.403363 | C | 7.892187  | -2.955329 | -0.621942 |
| C | -6.724882 | 0.034722  | -1.201126 | C | 7.925541  | -2.903435 | -2.009664 |
| C | -8.102004 | -0.026973 | -1.403035 | C | 6.743159  | -2.722337 | -2.715291 |

|   |          |           |           |   |          |           |           |
|---|----------|-----------|-----------|---|----------|-----------|-----------|
| C | 5.543266 | -2.576150 | -2.033532 | H | 4.898091 | 0.643006  | 6.518810  |
| H | 6.687104 | -2.861630 | 1.137596  | H | 2.503380 | 0.781119  | 7.159226  |
| H | 8.808093 | -3.109923 | -0.061729 | H | 0.807872 | 1.316191  | 5.431846  |
| H | 8.867082 | -3.007941 | -2.537200 | H | 1.479066 | 1.727586  | 3.122135  |
| H | 6.747801 | -2.681091 | -3.798684 | C | 2.852017 | 4.133693  | 1.700690  |
| H | 4.643220 | -2.417051 | -2.611892 | C | 2.590388 | 5.419033  | 1.239777  |
| C | 4.581821 | -4.114653 | 2.330795  | C | 3.325422 | 5.943921  | 0.184029  |
| C | 4.650529 | -4.624897 | 3.618285  | C | 4.325107 | 5.179867  | -0.403956 |
| C | 4.218218 | -3.857444 | 4.696582  | C | 4.577953 | 3.895122  | 0.054910  |
| C | 3.724541 | -2.580507 | 4.475745  | H | 2.276890 | 3.755170  | 2.538014  |
| C | 3.666899 | -2.074363 | 3.179919  | H | 1.812433 | 6.011118  | 1.709338  |
| H | 4.899962 | -4.736853 | 1.499179  | H | 3.117402 | 6.943840  | -0.180187 |
| H | 5.033138 | -5.626258 | 3.782401  | H | 4.903555 | 5.575513  | -1.231213 |
| H | 4.266531 | -4.257806 | 5.703319  | H | 5.356931 | 3.315856  | -0.426594 |
| H | 3.388784 | -1.965963 | 5.303128  | C | 5.591492 | 2.608815  | -2.964965 |
| H | 3.286207 | -1.071995 | 3.039140  | C | 6.893964 | 3.088679  | -3.031452 |
| C | 6.942136 | 2.411454  | 1.741500  | C | 7.920769 | 2.412153  | -2.381512 |
| C | 8.315041 | 2.217256  | 1.828203  | C | 7.641271 | 1.246873  | -1.679916 |
| C | 8.835341 | 0.931009  | 1.896627  | C | 6.338556 | 0.768726  | -1.623095 |
| C | 7.973505 | -0.158579 | 1.890071  | H | 4.797140 | 3.166790  | -3.450696 |
| C | 6.602880 | 0.043497  | 1.801327  | H | 7.106342 | 3.997649  | -3.584104 |
| H | 6.559488 | 3.424476  | 1.696182  | H | 8.934824 | 2.794844  | -2.420647 |
| H | 8.979472 | 3.074081  | 1.842509  | H | 8.427351 | 0.713107  | -1.158173 |
| H | 9.907115 | 0.778413  | 1.961858  | H | 6.152939 | -0.140117 | -1.064134 |
| H | 8.367819 | -1.166471 | 1.952563  | C | 2.180199 | 2.586540  | -3.893947 |
| H | 5.946572 | -0.818881 | 1.819767  | C | 1.475443 | 3.722643  | -4.270403 |
| C | 4.524904 | 1.069540  | 4.450950  | C | 0.942910 | 4.564360  | -3.300174 |
| C | 4.145118 | 0.873056  | 5.773108  | C | 1.105089 | 4.253510  | -1.957333 |
| C | 2.806729 | 0.953105  | 6.132276  | C | 1.815823 | 3.119514  | -1.588571 |
| C | 1.856835 | 1.260721  | 5.165833  | H | 2.577389 | 1.932274  | -4.664498 |
| C | 2.245999 | 1.485564  | 3.850471  | H | 1.338567 | 3.949170  | -5.322562 |
| H | 5.573322 | 0.976709  | 4.192044  | H | 0.394997 | 5.454280  | -3.591850 |

|                 |           |           |           |    |           |           |           |
|-----------------|-----------|-----------|-----------|----|-----------|-----------|-----------|
| H               | 0.694079  | 4.895985  | -1.187776 | C  | -4.113495 | 3.661227  | 2.778961  |
| H               | 1.935111  | 2.908941  | -0.533227 | C  | -3.628430 | 4.930612  | 3.074447  |
| C               | 4.133732  | -0.622124 | -4.488651 | C  | -2.265294 | 5.182678  | 3.036577  |
| C               | 4.004443  | -1.635684 | -5.430698 | C  | -1.389273 | 4.158682  | 2.695662  |
| C               | 2.997223  | -2.585182 | -5.297118 | C  | -1.876838 | 2.891979  | 2.404869  |
| C               | 2.111659  | -2.503845 | -4.229104 | Si | -3.846044 | 1.366452  | -1.699171 |
| C               | 2.237662  | -1.481481 | -3.296620 | C  | -2.754099 | 1.486489  | -3.234333 |
| H               | 4.947235  | 0.090434  | -4.585014 | C  | -2.815811 | 2.663996  | -3.997235 |
| H               | 4.696148  | -1.690757 | -6.264419 | C  | -2.202342 | 2.747434  | -5.240250 |
| H               | 2.903632  | -3.385554 | -6.022943 | C  | -1.484654 | 1.663053  | -5.736461 |
| H               | 1.326540  | -3.242746 | -4.110344 | C  | -1.396582 | 0.498933  | -4.986894 |
| H               | 1.531210  | -1.438573 | -2.477036 | C  | -2.039346 | 0.407042  | -3.756996 |
|                 |           |           |           | C  | -4.023592 | 3.139822  | -1.087065 |
| <b>8HH</b>      |           |           |           | C  | -2.889633 | 3.845992  | -0.668282 |
| 215             |           |           |           | C  | -2.969620 | 5.179959  | -0.301621 |
| E: -7056.320484 |           |           |           | C  | -4.194983 | 5.837096  | -0.337065 |
| C               | -1.172872 | -3.529203 | 0.445791  | C  | -5.332038 | 5.155849  | -0.747446 |
| C               | -2.570923 | -3.521250 | 0.549604  | C  | -5.243029 | 3.819432  | -1.126133 |
| C               | -3.164397 | -4.470162 | 1.392494  | C  | -5.526297 | 0.742586  | -2.291719 |
| C               | -2.396494 | -5.382566 | 2.107068  | C  | -5.881534 | 0.817279  | -3.644521 |
| C               | -1.013793 | -5.384899 | 1.971995  | C  | -7.081577 | 0.285340  | -4.098974 |
| C               | -0.404572 | -4.464664 | 1.128176  | C  | -7.951199 | -0.340654 | -3.211212 |
| Si              | -3.663022 | -2.353730 | -0.459703 | C  | -7.623415 | -0.415219 | -1.863909 |
| C               | -3.338768 | -2.605329 | -2.302877 | C  | -6.425695 | 0.128481  | -1.416957 |
| C               | -2.123032 | -3.100966 | -2.785927 | C  | -1.293043 | -0.080535 | 0.365755  |
| C               | -1.884265 | -3.219354 | -4.149480 | P  | 0.029651  | 0.111806  | -0.858684 |
| C               | -2.861435 | -2.847557 | -5.063432 | O  | 0.080869  | -0.824947 | -2.026357 |
| C               | -4.081504 | -2.365089 | -4.605511 | C  | -5.460013 | -2.818080 | -0.113045 |
| C               | -4.316483 | -2.248785 | -3.242537 | C  | -6.126180 | -3.745792 | -0.921751 |
| Si              | -3.162790 | -0.067599 | 0.095739  | C  | -7.444492 | -4.104666 | -0.667344 |
| Si              | -3.933063 | 0.864113  | 2.180504  | C  | -8.126710 | -3.545196 | 0.406477  |
| C               | -3.251691 | 2.612771  | 2.440483  | C  | -7.479139 | -2.634010 | 1.232096  |

|    |           |           |           |   |           |           |           |
|----|-----------|-----------|-----------|---|-----------|-----------|-----------|
| C  | -6.160530 | -2.285133 | 0.972019  | C | 3.459836  | -2.572149 | 2.626312  |
| C  | -0.662120 | -0.253805 | 1.543144  | C | 4.378450  | -2.803518 | 3.655052  |
| C  | 0.807791  | -0.213743 | 1.522736  | C | 3.961339  | -3.258469 | 4.902159  |
| C  | 1.393582  | -0.009398 | 0.327722  | C | 2.613244  | -3.489960 | 5.148357  |
| Si | 3.272988  | 0.045737  | 0.095752  | C | 1.683875  | -3.274171 | 4.137441  |
| Si | 3.799461  | 1.904901  | 1.511206  | C | 2.110366  | -2.831706 | 2.893571  |
| C  | 2.937531  | 1.558256  | 3.153412  | C | 2.921669  | 1.987554  | -2.731642 |
| C  | 1.758030  | 2.224199  | 3.505326  | C | 3.575612  | 3.218348  | -2.569465 |
| C  | 1.006900  | 1.834259  | 4.607572  | C | 2.959474  | 4.416323  | -2.897224 |
| C  | 1.434859  | 0.774087  | 5.396885  | C | 1.656968  | 4.417439  | -3.380188 |
| C  | 2.622989  | 0.121832  | 5.089924  | C | 0.981991  | 3.215514  | -3.534329 |
| C  | 3.359226  | 0.509515  | 3.978341  | C | 1.611939  | 2.015667  | -3.221745 |
| Si | 3.965130  | -2.105031 | 0.860136  | C | 5.673794  | 0.753375  | -2.494687 |
| C  | 3.161030  | -3.450643 | -0.185559 | C | 6.699434  | 0.323349  | -1.653090 |
| C  | 3.523367  | -4.782999 | 0.062133  | C | 8.037218  | 0.501145  | -1.992516 |
| C  | 2.929714  | -5.829702 | -0.630401 | C | 8.375289  | 1.114498  | -3.189562 |
| C  | 1.948112  | -5.565676 | -1.580732 | C | 7.369125  | 1.545574  | -4.048823 |
| C  | 1.566969  | -4.255334 | -1.827015 | C | 6.037808  | 1.362048  | -3.705481 |
| C  | 2.166410  | -3.209795 | -1.134629 | C | 5.643782  | 2.174142  | 1.776891  |
| Si | 3.833714  | 0.417676  | -2.208574 | C | 6.462509  | 2.474654  | 0.683431  |
| C  | 3.503866  | -1.110059 | -3.272840 | C | 7.831732  | 2.650767  | 0.831222  |
| C  | 2.366166  | -1.335212 | -4.053440 | C | 8.413107  | 2.534938  | 2.087711  |
| C  | 2.230153  | -2.498281 | -4.801782 | C | 7.616294  | 2.256176  | 3.192048  |
| C  | 3.220168  | -3.471226 | -4.775741 | C | 6.245514  | 2.082964  | 3.037463  |
| C  | 4.356235  | -3.270146 | -4.002569 | C | 3.034876  | 3.480555  | 0.805888  |
| C  | 4.496631  | -2.100279 | -3.270129 | C | 3.738035  | 4.688809  | 0.809656  |
| C  | 5.842508  | -2.171867 | 0.743887  | C | 3.131600  | 5.873901  | 0.405209  |
| C  | 6.509979  | -2.995835 | -0.167007 | C | 1.807992  | 5.873960  | -0.013240 |
| C  | 7.895047  | -2.956799 | -0.284393 | C | 1.093433  | 4.682074  | -0.032983 |
| C  | 8.639594  | -2.093919 | 0.510326  | C | 1.702929  | 3.504383  | 0.371964  |
| C  | 7.995936  | -1.264479 | 1.422073  | C | -5.808134 | 0.936257  | 2.380374  |
| C  | 6.612621  | -1.307122 | 1.533150  | C | -6.445150 | 0.241126  | 3.414887  |



|   |           |           |           |   |           |           |           |
|---|-----------|-----------|-----------|---|-----------|-----------|-----------|
| C | -7.826248 | 0.287257  | 3.566403  | H | 5.940361  | -3.667564 | -0.801401 |
| C | -8.600148 | 1.030692  | 2.683600  | H | 8.393472  | -3.597590 | -1.003234 |
| C | -7.985268 | 1.740771  | 1.659515  | H | 9.719426  | -2.062115 | 0.413613  |
| C | -6.604650 | 1.696885  | 1.517419  | H | 8.561426  | -0.571051 | 2.034414  |
| C | -3.252175 | -0.204816 | 3.585062  | H | 6.131801  | -0.628053 | 2.230833  |
| C | -2.682737 | 0.381775  | 4.721058  | H | 5.437971  | -2.645890 | 3.482470  |
| C | -2.105322 | -0.398296 | 5.716589  | H | 4.694490  | -3.440036 | 5.680799  |
| C | -2.077981 | -1.782157 | 5.592953  | H | 2.290571  | -3.846084 | 6.120766  |
| C | -2.654041 | -2.385863 | 4.480779  | H | 0.628165  | -3.458811 | 4.305486  |
| C | -3.241202 | -1.601420 | 3.497369  | H | 1.372451  | -2.704946 | 2.110856  |
| H | 1.347890  | -0.346967 | 2.451181  | H | 1.553428  | -0.623967 | -4.064099 |
| H | -1.161543 | -0.403714 | 2.491002  | H | 1.337544  | -2.644971 | -5.401066 |
| H | 4.771329  | 4.710763  | 1.140568  | H | 3.105932  | -4.383460 | -5.351040 |
| H | 3.696463  | 6.799699  | 0.420875  | H | 5.135257  | -4.023810 | -3.970534 |
| H | 1.336227  | 6.796894  | -0.332353 | H | 5.401958  | -1.957545 | -2.687910 |
| H | 0.065274  | 4.666470  | -0.376579 | H | 6.468281  | -0.149099 | -0.707399 |
| H | 1.124311  | 2.588306  | 0.362900  | H | 8.806744  | 0.158964  | -1.310142 |
| H | 1.407232  | 3.048032  | 2.895483  | H | 9.417068  | 1.254426  | -3.457263 |
| H | 0.081284  | 2.351843  | 4.836135  | H | 7.623115  | 2.021955  | -4.989380 |
| H | 0.843356  | 0.453132  | 6.246528  | H | 5.267256  | 1.701292  | -4.391019 |
| H | 2.964326  | -0.710101 | 5.693746  | H | 4.590229  | 3.246132  | -2.186493 |
| H | 4.259161  | -0.046315 | 3.738700  | H | 3.491150  | 5.350116  | -2.755402 |
| H | 6.031839  | 2.563866  | -0.308114 | H | 1.166253  | 5.353246  | -3.625082 |
| H | 8.440589  | 2.865391  | -0.039672 | H | -0.037136 | 3.199489  | -3.900111 |
| H | 9.482735  | 2.668511  | 2.207654  | H | 1.049544  | 1.099491  | -3.356142 |
| H | 8.061094  | 2.179535  | 4.178258  | H | -5.182921 | 3.490106  | 2.822336  |
| H | 5.639377  | 1.881318  | 3.913890  | H | -4.322490 | 5.722833  | 3.332389  |
| H | 4.275082  | -5.007627 | 0.814171  | H | -1.883896 | 6.171664  | 3.265971  |
| H | 3.227292  | -6.852073 | -0.424115 | H | -0.323630 | 4.352910  | 2.645890  |
| H | 1.478309  | -6.381282 | -2.119159 | H | -1.167276 | 2.112720  | 2.153520  |
| H | 0.806435  | -4.029631 | -2.564787 | H | -5.856102 | -0.348931 | 4.109776  |
| H | 1.831233  | -2.206550 | -1.362834 | H | -8.297910 | -0.258677 | 4.376367  |

|   |           |           |           |                          |                |           |           |
|---|-----------|-----------|-----------|--------------------------|----------------|-----------|-----------|
| H | -9.678141 | 1.061830  | 2.797044  | H                        | -1.958199      | -0.520275 | -3.208351 |
| H | -8.579349 | 2.327845  | 0.968094  | H                        | -6.134341      | 3.301567  | -1.469185 |
| H | -6.141833 | 2.269266  | 0.720779  | H                        | -6.288961      | 5.665160  | -0.781868 |
| H | -2.671804 | 1.462216  | 4.821141  | H                        | -4.260612      | 6.878416  | -0.041675 |
| H | -1.668500 | 0.078028  | 6.587590  | H                        | -2.082128      | 5.704071  | 0.034145  |
| H | -1.609033 | -2.387975 | 6.360567  | H                        | -1.925846      | 3.344299  | -0.629503 |
| H | -2.634147 | -3.463636 | 4.362309  | H                        | -0.054020      | 1.479560  | -1.218064 |
| H | -3.661348 | -2.098096 | 2.630749  | <b>{8H}</b> <sub>2</sub> |                |           |           |
| H | -5.614591 | -4.187879 | -1.770003 | 428                      |                |           |           |
| H | -7.941170 | -4.820395 | -1.313190 | E=                       | -14111.2680154 |           |           |
| H | -9.158178 | -3.819351 | 0.599405  | C                        | 3.504218       | 4.825818  | -4.285286 |
| H | -7.995663 | -2.182012 | 2.071486  | C                        | 2.696473       | 4.003783  | -3.482167 |
| H | -5.685886 | -1.564011 | 1.625430  | C                        | 2.149598       | 2.861423  | -4.070775 |
| H | -4.244951 | -4.502244 | 1.490334  | C                        | 2.382983       | 2.571773  | -5.410364 |
| H | -2.882865 | -6.104886 | 2.754200  | C                        | 3.173166       | 3.401804  | -6.188767 |
| H | -0.410463 | -6.108010 | 2.509755  | C                        | 3.746570       | 4.531393  | -5.619217 |
| H | 0.669896  | -4.483702 | 0.987463  | Si                       | 2.271647       | 4.578062  | -1.730276 |
| H | -0.663090 | -2.814621 | -0.191929 | C                        | 2.693983       | 6.425191  | -1.800570 |
| H | -1.339347 | -3.388848 | -2.098647 | C                        | 1.942977       | 7.171351  | -2.725232 |
| H | -0.926512 | -3.595371 | -4.493468 | C                        | 2.140924       | 8.533228  | -2.889368 |
| H | -2.673566 | -2.930702 | -6.128392 | C                        | 3.109088       | 9.191010  | -2.134558 |
| H | -4.852791 | -2.068358 | -5.307386 | C                        | 3.871285       | 8.471331  | -1.228698 |
| H | -5.277867 | -1.872758 | -2.912225 | C                        | 3.663356       | 7.104012  | -1.070536 |
| H | -5.199864 | 1.268546  | -4.357815 | Si                       | 3.179186       | 3.348007  | 0.160263  |
| H | -7.333037 | 0.346689  | -5.152327 | Si                       | 5.626575       | 3.285539  | 0.087061  |
| H | -8.878225 | -0.773186 | -3.571342 | C                        | 6.352821       | 2.910677  | 1.803949  |
| H | -8.279221 | -0.914013 | -1.158883 | C                        | 7.729784       | 3.092390  | 1.989211  |
| H | -6.190568 | 0.038131  | -0.364377 | C                        | 8.330529       | 2.844854  | 3.216813  |
| H | -3.358681 | 3.524764  | -3.619577 | C                        | 7.572199       | 2.383072  | 4.289575  |
| H | -2.272375 | 3.663671  | -5.816553 | C                        | 6.212227       | 2.160138  | 4.120073  |
| H | -0.990380 | 1.732251  | -6.699216 | C                        | 5.621666       | 2.423392  | 2.888936  |
| H | -0.837307 | -0.354098 | -5.354924 | C                        | 2.594185       | 1.421577  | 0.267964  |

|    |           |           |           |    |           |           |          |
|----|-----------|-----------|-----------|----|-----------|-----------|----------|
| C  | 3.567205  | 0.665328  | 0.797407  | C  | -6.643085 | -4.355771 | 0.349319 |
| C  | 3.582675  | -0.785789 | 0.580670  | C  | -6.576190 | -2.986509 | 0.565783 |
| C  | 2.601298  | -1.391474 | -0.102084 | C  | -5.670122 | -2.458408 | 1.476405 |
| Si | 3.281183  | -3.175225 | -0.718676 | Si | -4.333851 | 1.008258  | 4.407296 |
| Si | 1.868598  | -5.126533 | -1.031357 | C  | -4.461658 | 1.001299  | 6.304334 |
| C  | 1.195709  | -6.132603 | 0.424183  | C  | -5.277702 | 0.109807  | 7.008338 |
| C  | -0.116263 | -6.619150 | 0.360303  | C  | -5.394754 | 0.162135  | 8.391407 |
| C  | -0.543344 | -7.650498 | 1.187488  | C  | -4.701240 | 1.123237  | 9.114093 |
| C  | 0.331762  | -8.221294 | 2.101104  | C  | -3.894314 | 2.030348  | 8.438198 |
| C  | 1.619980  | -7.715305 | 2.222239  | C  | -3.778877 | 1.968197  | 7.055671 |
| C  | 2.034642  | -6.678470 | 1.398546  | C  | -6.066426 | 0.685136  | 3.685736 |
| P  | 1.480642  | 0.095391  | -0.533503 | C  | -6.893552 | -0.372704 | 4.068027 |
| O  | 1.340744  | 0.240627  | -2.001096 | C  | -8.162837 | -0.541119 | 3.529441 |
| O  | 0.022134  | 0.125192  | 0.223943  | C  | -8.637291 | 0.346521  | 2.575839 |
| P  | -1.528483 | -0.644080 | 0.088696  | C  | -7.833843 | 1.403735  | 2.165957 |
| C  | -2.860773 | 0.209085  | -1.072432 | C  | -6.575970 | 1.570562  | 2.725392 |
| Si | -3.680435 | 0.357995  | -2.893498 | C  | -4.019037 | 2.821616  | 3.946567 |
| Si | -4.790297 | -1.786012 | -3.546558 | C  | -4.803088 | 3.761999  | 4.632477 |
| C  | -4.433368 | -2.255877 | -5.355871 | C  | -4.645831 | 5.125990  | 4.431392 |
| C  | -5.446945 | -2.804664 | -6.153931 | C  | -3.679323 | 5.583821  | 3.544686 |
| C  | -5.205942 | -3.185109 | -7.468311 | C  | -2.912468 | 4.672007  | 2.835296 |
| C  | -3.941125 | -3.029692 | -8.020776 | C  | -3.103220 | 3.306100  | 3.011444 |
| C  | -2.919851 | -2.499182 | -7.245422 | Si | -0.935986 | -0.569461 | 5.260398 |
| C  | -3.170636 | -2.119495 | -5.933946 | C  | -1.446228 | -1.684041 | 6.702885 |
| C  | -3.874616 | 0.402148  | -0.199730 | C  | -1.038805 | -3.023646 | 6.730000 |
| C  | -3.653917 | 0.252785  | 1.211422  | C  | -1.317642 | -3.840606 | 7.817494 |
| C  | -2.446051 | -0.160137 | 1.657205  | C  | -2.003595 | -3.331693 | 8.914022 |
| Si | -2.676661 | -0.609405 | 3.562912  | C  | -2.417147 | -2.005515 | 8.909388 |
| Si | -3.806876 | -2.773515 | 3.700004  | C  | -2.145812 | -1.195880 | 7.813053 |
| C  | -4.793560 | -3.290652 | 2.177936  | C  | 0.875869  | -1.008955 | 4.948452 |
| C  | -4.867994 | -4.668365 | 1.933672  | C  | 1.625747  | -1.260429 | 6.111581 |
| C  | -5.786386 | -5.198947 | 1.039578  | C  | 3.011149  | -1.252368 | 6.104218 |

|    |           |           |           |    |           |           |           |
|----|-----------|-----------|-----------|----|-----------|-----------|-----------|
| C  | 3.691244  | -0.995301 | 4.922249  | C  | -7.207657 | 3.786409  | -6.685193 |
| C  | 2.968353  | -0.775145 | 3.763795  | C  | -5.919209 | 4.080330  | -6.264173 |
| C  | 1.576922  | -0.779791 | 3.764477  | C  | -5.426958 | 3.529469  | -5.089432 |
| C  | -0.784078 | 1.188640  | 5.941675  | Si | 2.833197  | 4.884703  | 2.130514  |
| C  | -0.445517 | 1.432250  | 7.279455  | C  | 1.309623  | 6.026207  | 2.150600  |
| C  | -0.340063 | 2.724519  | 7.771250  | C  | 0.465566  | 5.967341  | 3.264599  |
| C  | -0.578281 | 3.811245  | 6.936084  | C  | -0.525276 | 6.916697  | 3.482859  |
| C  | -0.877545 | 3.591192  | 5.601005  | C  | -0.711648 | 7.952853  | 2.579231  |
| C  | -0.945936 | 2.292770  | 5.109845  | C  | 0.103567  | 8.026124  | 1.457334  |
| Si | -5.577935 | 2.013917  | -2.615508 | C  | 1.094925  | 7.076737  | 1.252153  |
| C  | -7.159114 | 1.389773  | -1.745126 | C  | 0.438332  | 4.482713  | -1.334384 |
| C  | -8.198787 | 2.334334  | -1.694711 | C  | -0.310005 | 5.616881  | -1.009428 |
| C  | -9.454047 | 2.012201  | -1.203549 | C  | -1.585812 | 5.514077  | -0.479489 |
| C  | -9.700643 | 0.729837  | -0.727338 | C  | -2.143389 | 4.264822  | -0.268517 |
| C  | -8.671949 | -0.196756 | -0.706144 | C  | -1.428626 | 3.127743  | -0.605574 |
| C  | -7.413867 | 0.136067  | -1.198346 | C  | -0.158815 | 3.234922  | -1.145996 |
| Si | -2.430161 | 1.243835  | -4.819068 | Si | 4.402517  | -3.058270 | -2.937395 |
| C  | -1.753708 | 2.985958  | -4.533292 | C  | 3.446952  | -3.761672 | -4.421766 |
| C  | -0.753931 | 3.453746  | -5.393160 | C  | 4.104742  | -4.457566 | -5.448037 |
| C  | -0.385351 | 4.792995  | -5.419823 | C  | 3.422812  | -4.907763 | -6.569176 |
| C  | -1.036262 | 5.704261  | -4.600447 | C  | 2.059586  | -4.665779 | -6.704576 |
| C  | -2.006271 | 5.257090  | -3.712692 | C  | 1.400981  | -3.935519 | -5.728069 |
| C  | -2.334464 | 3.910127  | -3.664743 | C  | 2.096713  | -3.486243 | -4.611951 |
| C  | -5.280208 | 3.552322  | -1.520420 | Si | 4.978958  | -3.818784 | 1.024437  |
| C  | -5.092014 | 4.841409  | -2.027379 | C  | 6.554968  | -2.746272 | 1.220582  |
| C  | -5.109658 | 5.958643  | -1.199002 | C  | 7.802178  | -3.141577 | 0.721226  |
| C  | -5.336157 | 5.817456  | 0.162437  | C  | 8.963519  | -2.436429 | 1.017636  |
| C  | -5.549074 | 4.549488  | 0.689231  | C  | 8.911829  | -1.302811 | 1.815930  |
| C  | -5.517114 | 3.440124  | -0.143096 | C  | 7.692475  | -0.895543 | 2.340453  |
| C  | -6.200070 | 2.680436  | -4.288845 | C  | 6.542180  | -1.618666 | 2.056939  |
| C  | -7.501096 | 2.409750  | -4.732710 | C  | 4.852968  | -1.331371 | -3.542655 |
| C  | -7.997657 | 2.945892  | -5.913735 | C  | 5.501127  | -1.275344 | -4.786354 |

|   |          |           |           |   |           |           |           |
|---|----------|-----------|-----------|---|-----------|-----------|-----------|
| C | 5.804558 | -0.063933 | -5.387977 | C | 6.471853  | 6.364703  | -2.542339 |
| C | 5.457081 | 1.125887  | -4.760109 | C | 5.987471  | 5.215551  | -1.936522 |
| C | 4.818802 | 1.089052  | -3.532137 | C | -0.937584 | 0.275381  | -5.436403 |
| C | 4.525667 | -0.125698 | -2.928669 | C | -0.714148 | 0.006977  | -6.791859 |
| C | 6.021075 | -4.047875 | -2.935023 | C | 0.498393  | -0.522771 | -7.222480 |
| C | 6.056391 | -5.416482 | -3.233513 | C | 1.514300  | -0.777433 | -6.309181 |
| C | 7.259320 | -6.093550 | -3.378732 | C | 1.306852  | -0.509994 | -4.962331 |
| C | 8.463875 | -5.425334 | -3.188937 | C | 0.088562  | -0.002976 | -4.536401 |
| C | 8.453179 | -4.071025 | -2.878259 | C | -3.571380 | 1.407752  | -6.330378 |
| C | 7.244170 | -3.391716 | -2.773809 | C | -3.163647 | 2.218270  | -7.397652 |
| C | 2.768878 | 4.015789  | 3.809336  | C | -3.911849 | 2.308461  | -8.564708 |
| C | 3.083739 | 4.788823  | 4.939737  | C | -5.097185 | 1.595590  | -8.692771 |
| C | 3.074620 | 4.249762  | 6.215141  | C | -5.529492 | 0.798446  | -7.642198 |
| C | 2.733477 | 2.915421  | 6.394834  | C | -4.769841 | 0.715010  | -6.485324 |
| C | 2.378373 | 2.148325  | 5.298999  | C | -4.317044 | -3.303317 | -2.524717 |
| C | 2.392169 | 2.691644  | 4.018770  | C | -4.681036 | -4.555070 | -3.043712 |
| C | 4.304988 | 6.099663  | 2.393516  | C | -4.295387 | -5.732231 | -2.421604 |
| C | 4.244762 | 7.450625  | 2.033111  | C | -3.501336 | -5.685515 | -1.281797 |
| C | 5.249762 | 8.349480  | 2.369945  | C | -3.145770 | -4.459769 | -0.742659 |
| C | 6.342844 | 7.931053  | 3.115543  | C | -3.577443 | -3.285517 | -1.345578 |
| C | 6.407479 | 6.607466  | 3.529638  | C | -6.690577 | -1.754047 | -3.527052 |
| C | 5.406854 | 5.714069  | 3.170579  | C | -7.407387 | -2.735784 | -2.836024 |
| C | 6.585644 | 2.041876  | -0.974994 | C | -8.793614 | -2.807480 | -2.906095 |
| C | 7.394322 | 2.411537  | -2.056445 | C | -9.501140 | -1.894203 | -3.675414 |
| C | 8.193621 | 1.487264  | -2.715625 | C | -8.808956 | -0.918825 | -4.381673 |
| C | 8.216517 | 0.164641  | -2.301697 | C | -7.424477 | -0.858284 | -4.309795 |
| C | 7.452001 | -0.214977 | -1.208561 | C | 4.259759  | -3.803092 | 2.773038  |
| C | 6.657163 | 0.712376  | -0.558286 | C | 5.191241  | -3.978661 | 3.810588  |
| C | 6.209051 | 4.951687  | -0.578498 | C | 4.791144  | -4.255541 | 5.107643  |
| C | 6.930260 | 5.894733  | 0.154750  | C | 3.436699  | -4.341440 | 5.405435  |
| C | 7.401134 | 7.059938  | -0.440834 | C | 2.500621  | -4.129107 | 4.407386  |
| C | 7.179389 | 7.295138  | -1.791327 | C | 2.908081  | -3.870965 | 3.101997  |

|   |           |           |           |   |           |           |           |
|---|-----------|-----------|-----------|---|-----------|-----------|-----------|
| C | 5.636096  | -5.605834 | 0.902969  | H | -4.507324 | 0.416396  | 1.855067  |
| C | 5.381523  | -6.535119 | 1.923409  | H | -4.890118 | 0.620968  | -0.504666 |
| C | 5.927337  | -7.811981 | 1.899707  | H | 1.194924  | 6.671266  | -3.332837 |
| C | 6.773120  | -8.191683 | 0.865405  | H | 1.544328  | 9.082779  | -3.609515 |
| C | 7.059604  | -7.282888 | -0.142486 | H | 3.269359  | 10.256104 | -2.261696 |
| C | 6.491467  | -6.016599 | -0.121140 | H | 4.640595  | 8.959018  | -0.640463 |
| C | 0.397476  | -4.704307 | -2.107910 | H | 4.281320  | 6.574051  | -0.360859 |
| C | -0.206391 | -5.745762 | -2.823669 | H | 1.536225  | 2.178474  | -3.492213 |
| C | -1.195227 | -5.493994 | -3.756063 | H | 1.943729  | 1.687044  | -5.847307 |
| C | -1.610506 | -4.191523 | -3.981687 | H | 3.347173  | 3.162764  | -7.232387 |
| C | -1.068503 | -3.151494 | -3.242039 | H | 4.370687  | 5.191392  | -6.212505 |
| C | -0.076783 | -3.408642 | -2.306573 | H | 3.932548  | 5.730968  | -3.872600 |
| C | 2.868775  | -6.452953 | -1.986489 | H | 0.105473  | 6.602509  | -1.161752 |
| C | 3.704392  | -7.358770 | -1.321165 | H | -2.141108 | 6.409088  | -0.219148 |
| C | 4.336498  | -8.399115 | -1.990526 | H | -3.131888 | 4.172427  | 0.152934  |
| C | 4.142919  | -8.573732 | -3.354000 | H | -1.871559 | 2.156345  | -0.455934 |
| C | 3.314440  | -7.694440 | -4.038462 | H | 0.366081  | 2.332742  | -1.435197 |
| C | 2.691773  | -6.651752 | -3.363611 | H | -1.491990 | 0.209448  | -7.519709 |
| C | -2.524091 | -4.120417 | 3.979661  | H | 0.651661  | -0.726868 | -8.277160 |
| C | -2.738708 | -5.143440 | 4.907512  | H | 2.466248  | -1.179686 | -6.637260 |
| C | -1.785253 | -6.129762 | 5.124968  | H | 2.099496  | -0.657230 | -4.240133 |
| C | -0.608314 | -6.121484 | 4.394609  | H | -0.030099 | 0.211562  | -3.483043 |
| C | -0.407953 | -5.150534 | 3.420033  | H | -0.245857 | 2.761964  | -6.054525 |
| C | -1.347645 | -4.152200 | 3.224935  | H | 0.413736  | 5.115197  | -6.078991 |
| C | -5.066669 | -3.058838 | 5.099935  | H | -0.778627 | 6.757550  | -4.639446 |
| C | -6.364686 | -3.509795 | 4.816973  | H | -2.495673 | 5.949005  | -3.038720 |
| C | -7.246387 | -3.856686 | 5.832563  | H | -3.057651 | 3.582830  | -2.930041 |
| C | -6.847442 | -3.782167 | 7.162849  | H | -2.251499 | 2.799372  | -7.322597 |
| C | -5.558997 | -3.364162 | 7.464459  | H | -3.567669 | 2.942533  | -9.374792 |
| C | -4.687353 | -3.008071 | 6.442734  | H | -5.683213 | 1.667611  | -9.602452 |
| H | 4.433022  | 1.075524  | 1.295723  | H | -6.456450 | 0.240869  | -7.715498 |
| H | 4.494535  | -1.289118 | 0.863103  | H | -5.128731 | 0.087089  | -5.686298 |

|   |          |           |           |   |           |           |           |
|---|----------|-----------|-----------|---|-----------|-----------|-----------|
| H | 5.164671 | -4.666205 | -5.376887 | H | 7.122447  | 8.633213  | 3.390616  |
| H | 3.959334 | -5.451445 | -7.339578 | H | 7.236516  | 6.259158  | 4.136002  |
| H | 1.522600 | -5.025303 | -7.575650 | H | 5.481709  | 4.703716  | 3.541305  |
| H | 0.350304 | -3.694514 | -5.830769 | H | 3.347268  | 5.833260  | 4.820512  |
| H | 1.562292 | -2.898658 | -3.884195 | H | 3.331393  | 4.872151  | 7.065513  |
| H | 5.769063 | -2.193604 | -5.299480 | H | 2.716059  | 2.477568  | 7.386323  |
| H | 6.307237 | -0.049062 | -6.349113 | H | 2.071218  | 1.127695  | 5.446565  |
| H | 5.678132 | 2.080268  | -5.223648 | H | 2.110039  | 2.061289  | 3.179766  |
| H | 4.545820 | 2.011263  | -3.038842 | H | 0.600871  | 5.181147  | 3.994681  |
| H | 4.029834 | -0.120027 | -1.970075 | H | -1.151352 | 6.841541  | 4.365363  |
| H | 5.135073 | -5.967346 | -3.362453 | H | -1.478293 | 8.701039  | 2.750964  |
| H | 7.247639 | -7.150263 | -3.622753 | H | -0.025888 | 8.825553  | 0.735457  |
| H | 9.405242 | -5.954585 | -3.289978 | H | 1.708026  | 7.169116  | 0.367389  |
| H | 9.385937 | -3.535697 | -2.735610 | H | 0.119948  | -6.768253 | -2.667775 |
| H | 7.250668 | -2.326015 | -2.590776 | H | -1.642871 | -6.310046 | -4.311588 |
| H | 7.418811 | 3.436613  | -2.398793 | H | -2.373793 | -3.998393 | -4.720573 |
| H | 8.796814 | 1.806323  | -3.558366 | H | -1.401541 | -2.131568 | -3.399415 |
| H | 8.833103 | -0.561634 | -2.820714 | H | 0.361706  | -2.572923 | -1.768983 |
| H | 7.476589 | -1.230398 | -0.842226 | H | -0.809979 | -6.204094 | -0.360636 |
| H | 6.117030 | 0.381067  | 0.316824  | H | -1.563486 | -8.011576 | 1.114497  |
| H | 8.342947 | 3.437638  | 1.162295  | H | 0.002796  | -9.038240 | 2.733816  |
| H | 9.395600 | 3.010517  | 3.337536  | H | 2.308381  | -8.129514 | 2.951389  |
| H | 8.042482 | 2.194712  | 5.248408  | H | 3.042300  | -6.307432 | 1.506578  |
| H | 5.593907 | 1.811160  | 4.940495  | H | 3.873685  | -7.274736 | -0.256770 |
| H | 4.551176 | 2.289782  | 2.818186  | H | 4.978943  | -9.072074 | -1.434762 |
| H | 7.121490 | 5.731727  | 1.206993  | H | 4.628656  | -9.390481 | -3.877261 |
| H | 7.943840 | 7.782695  | 0.158426  | H | 3.151513  | -7.805361 | -5.104567 |
| H | 7.549301 | 8.202458  | -2.255960 | H | 2.055742  | -5.990088 | -3.933825 |
| H | 6.280943 | 6.541260  | -3.595266 | H | 4.752490  | -6.266698 | 2.763117  |
| H | 5.424656 | 4.510131  | -2.539926 | H | 5.698741  | -8.506197 | 2.700932  |
| H | 3.390203 | 7.834963  | 1.495808  | H | 7.207753  | -9.185264 | 0.849689  |
| H | 5.161100 | 9.386623  | 2.064484  | H | 7.714750  | -7.555625 | -0.961638 |

|   |           |           |           |   |            |           |           |
|---|-----------|-----------|-----------|---|------------|-----------|-----------|
| H | 6.717519  | -5.344289 | -0.932588 | H | -9.320903  | -3.579480 | -2.355140 |
| H | 6.253074  | -3.934846 | 3.592121  | H | -10.583044 | -1.942658 | -3.727620 |
| H | 5.535104  | -4.403715 | 5.882787  | H | -9.346596  | -0.201132 | -4.992030 |
| H | 3.108120  | -4.543510 | 6.418975  | H | -6.919451  | -0.088990 | -4.880507 |
| H | 1.448306  | -4.146048 | 4.650162  | H | -5.253504  | -4.613584 | -3.964517 |
| H | 2.154209  | -3.717551 | 2.334903  | H | -4.584421  | -6.687429 | -2.846558 |
| H | 7.889522  | -4.019285 | 0.096944  | H | -3.167061  | -6.605020 | -0.812593 |
| H | 9.910302  | -2.775204 | 0.611450  | H | -2.535388  | -4.410576 | 0.151905  |
| H | 9.812863  | -0.740479 | 2.032576  | H | -3.293688  | -2.344478 | -0.899095 |
| H | 7.631273  | -0.013399 | 2.967737  | H | -8.151215  | 1.775342  | -4.145318 |
| H | 5.620509  | -1.307183 | 2.538274  | H | -9.009071  | 2.708134  | -6.226033 |
| H | 1.115530  | -1.442065 | 7.050788  | H | -7.590538  | 4.204501  | -7.609568 |
| H | 3.558058  | -1.445587 | 7.020224  | H | -5.278945  | 4.719571  | -6.860572 |
| H | 4.774846  | -0.986744 | 4.897894  | H | -4.405651  | 3.761675  | -4.819615 |
| H | 3.497426  | -0.587687 | 2.844372  | H | -8.029530  | 3.339650  | -2.066633 |
| H | 1.047233  | -0.568313 | 2.838459  | H | -10.239616 | 2.759772  | -1.199291 |
| H | -0.494277 | -3.441967 | 5.889988  | H | -10.684687 | 0.461966  | -0.358024 |
| H | -1.001537 | -4.877338 | 7.800779  | H | -8.855596  | -1.186888 | -0.308053 |
| H | -2.217210 | -3.968156 | 9.765915  | H | -6.633390  | -0.614388 | -1.176805 |
| H | -2.963119 | -1.594673 | 9.751420  | H | -4.951809  | 4.996352  | -3.089362 |
| H | -2.492958 | -0.171573 | 7.828875  | H | -4.959528  | 6.943618  | -1.627961 |
| H | -0.272685 | 0.602825  | 7.955954  | H | -5.354560  | 6.685317  | 0.812172  |
| H | -0.082446 | 2.884855  | 8.812749  | H | -5.730304  | 4.432086  | 1.752004  |
| H | -0.520387 | 4.822618  | 7.322472  | H | -5.722385  | 2.468817  | 0.289578  |
| H | -1.089969 | 4.420523  | 4.939433  | H | -3.650437  | -5.160665 | 5.491698  |
| H | -1.150748 | 2.148397  | 4.056593  | H | -1.963940  | -6.898983 | 5.868815  |
| H | -6.446616 | -2.928743 | -5.753929 | H | 0.150181   | -6.876220 | 4.560772  |
| H | -6.012329 | -3.600951 | -8.062690 | H | 0.484039   | -5.182326 | 2.812619  |
| H | -3.753960 | -3.318698 | -9.049022 | H | -1.159565  | -3.392456 | 2.468881  |
| H | -1.925031 | -2.368256 | -7.655585 | H | -4.203550  | -5.343597 | 2.462415  |
| H | -2.351595 | -1.703240 | -5.362893 | H | -5.820363  | -6.269156 | 0.870744  |
| H | -6.875198 | -3.457408 | -2.230071 | H | -7.357820  | -4.763113 | -0.357487 |



|                 |           |           |           |   |           |           |           |
|-----------------|-----------|-----------|-----------|---|-----------|-----------|-----------|
| H               | -7.243435 | -2.327650 | 0.029292  | C | -1.289133 | -0.007853 | 2.139717  |
| H               | -5.691166 | -1.391467 | 1.664329  | P | -2.156759 | -1.508463 | 2.635915  |
| H               | -6.701978 | -3.580656 | 3.789372  | C | -3.477113 | -0.539400 | 3.389812  |
| H               | -8.246392 | -4.194076 | 5.582414  | C | -3.225710 | 0.783765  | 3.245702  |
| H               | -7.534758 | -4.058073 | 7.955207  | C | -1.983558 | 1.085528  | 2.536002  |
| H               | -5.220932 | -3.306522 | 8.493286  | C | 1.215169  | -0.011796 | 3.623588  |
| H               | -3.690633 | -2.689617 | 6.704650  | C | -1.294713 | -0.011751 | -0.771254 |
| H               | -5.838822 | -0.651890 | 6.489840  | C | -4.658902 | -1.131835 | 4.065404  |
| H               | -6.032434 | -0.554352 | 8.897492  | C | -5.816096 | -1.414069 | 3.323178  |
| H               | -4.793157 | 1.170196  | 10.193927 | C | -6.916483 | -1.967038 | 3.973638  |
| H               | -3.343522 | 2.789239  | 8.982533  | C | -6.874653 | -2.241132 | 5.332226  |
| H               | -3.147667 | 2.694344  | 6.561070  | C | -5.725908 | -1.964832 | 6.057935  |
| H               | -5.544394 | 3.423536  | 5.349332  | C | -4.607151 | -1.411826 | 5.439617  |
| H               | -5.265936 | 5.827067  | 4.979285  | C | -5.873457 | -1.126473 | 1.844918  |
| H               | -3.524841 | 6.647216  | 3.397990  | C | -3.363224 | -1.121897 | 6.239496  |
| H               | -2.156873 | 5.024463  | 2.146994  | H | -3.883950 | 1.560758  | 3.621471  |
| H               | -2.508671 | 2.620429  | 2.415702  | H | -1.654183 | 2.102465  | 2.347446  |
| H               | -5.973723 | 2.413615  | 2.414290  | H | 3.346099  | 0.012160  | 1.956723  |
| H               | -8.181772 | 2.092852  | 1.403672  | H | 3.358193  | 0.024508  | -0.514381 |
| H               | -9.622046 | 0.215053  | 2.143335  | H | 1.223712  | 0.012101  | -1.759602 |
| H               | -8.771604 | -1.377568 | 3.855565  | H | -5.691464 | -2.181512 | 7.120637  |
| H               | -6.554064 | -1.100100 | 4.786216  | H | -7.738763 | -2.671260 | 5.826284  |
| <b>8I</b>       |           |           |           | H | -7.814190 | -2.185400 | 3.404506  |
| 42              |           |           |           | H | 2.236488  | 0.004479  | 4.007746  |
| E= -1190.648090 |           |           |           | H | 0.679750  | 0.849364  | 4.031551  |
| C               | 0.000000  | 0.000000  | 0.000000  | H | 0.720270  | -0.906599 | 4.013800  |
| C               | 0.000000  | 0.000000  | 1.403438  | H | -1.882659 | -0.906130 | -0.542659 |
| C               | 1.208750  | 0.000000  | 2.116583  | H | -1.917763 | 0.849854  | -0.517950 |
| C               | 2.408844  | 0.010314  | 1.409896  | H | -1.106649 | 0.003804  | -1.846111 |
| C               | 2.416614  | 0.016009  | 0.023342  | H | -3.504893 | -1.388505 | 7.288203  |
| C               | 1.218448  | 0.010293  | -0.674504 | H | -2.507515 | -1.687827 | 5.858268  |
|                 |           |           |           | H | -3.092210 | -0.064331 | 6.186356  |

H -5.689692 -0.069301 1.636779  
H -5.110727 -1.693560 1.302221  
H -6.848937 -1.393392 1.434890  
O -1.410003 -2.511432 3.845878

**8IH**

43

E: -1191.278866

C 0.056386 0.017825 -0.009119  
C 0.004576 -0.012283 1.393723  
C 1.180738 -0.063733 2.157846  
C 2.407605 -0.074805 1.499183  
C 2.470212 -0.036038 0.114637  
C 1.301802 0.010901 -0.630905  
C -1.313124 -0.006915 2.069061  
C -1.903361 1.005709 2.715568  
C -3.221661 0.710786 3.317545  
C -3.678453 -0.536125 3.149272  
P -2.395533 -1.466100 2.243508  
O -2.749972 -2.297106 1.060563  
C 1.133778 -0.110565 3.664732  
C -1.208604 0.064932 -0.825708  
C -4.943009 -1.119025 3.652852  
C -5.063184 -1.460824 5.008806  
C -6.260091 -2.013933 5.456735  
C -7.315506 -2.224780 4.582641  
C -7.184800 -1.886899 3.243997  
C -6.002249 -1.336976 2.757283  
C -3.925319 -1.243145 5.974712  
C -5.866208 -0.976197 1.301065  
H -1.457359 1.991150 2.803505  
H -3.770999 1.473611 3.859826

H -8.010358 -2.054300 2.560403  
H -8.241306 -2.657323 4.945111  
H -6.361042 -2.284971 6.502435  
H 1.351750 0.038978 -1.714227  
H 3.432471 -0.046347 -0.384897  
H 3.322168 -0.118414 2.081261  
H -6.796795 -1.170214 0.765374  
H -5.617586 0.082396 1.180988  
H -5.067300 -1.554639 0.828264  
H -2.993562 -1.677141 5.601861  
H -3.738107 -0.178627 6.140005  
H -4.147088 -1.699201 6.940822  
H -0.979980 0.129794 -1.890660  
H -1.816819 -0.828145 -0.655784  
H -1.818482 0.931626 -0.554142  
H 0.765363 0.829869 4.083569  
H 0.468240 -0.901411 4.021321  
H 2.127505 -0.294938 4.075891  
H -1.756628 -2.183143 3.290912

**{8I}2**

84

E= -2381.413614

C 3.231235 -2.876424 -1.196905  
C 2.737343 -2.361997 0.012848  
C 3.620888 -1.882656 0.994939  
C 4.990306 -1.943183 0.758521  
C 5.485664 -2.453599 -0.429792  
C 4.608074 -2.908341 -1.401928  
C 1.291407 -2.428150 0.338402  
P -0.109335 -1.607570 -0.488217  
P -0.100318 1.712236 0.620299

|   |           |           |           |   |           |           |           |
|---|-----------|-----------|-----------|---|-----------|-----------|-----------|
| C | 1.301493  | 2.526922  | -0.210315 | C | 0.809226  | 3.419278  | -1.099895 |
| C | 2.748181  | 2.454528  | 0.110570  | H | 1.433783  | -4.034272 | 1.740397  |
| C | 3.626446  | 1.971598  | -0.874493 | H | -1.135095 | -3.902273 | 2.157489  |
| C | 4.996887  | 2.026479  | -0.642642 | H | -1.124056 | 4.012048  | -2.021740 |
| C | 5.498298  | 2.534775  | 0.544032  | H | 1.446551  | 4.132914  | -1.612191 |
| C | 4.625827  | 2.993041  | 1.519130  | H | 5.675833  | 1.646021  | -1.398209 |
| C | 3.248226  | 2.966824  | 1.318711  | H | 6.569065  | 2.568061  | 0.712787  |
| C | 3.119238  | 1.418478  | -2.182245 | H | 5.017508  | 3.396290  | 2.447672  |
| C | 2.329007  | 3.516590  | 2.378476  | H | -4.870665 | 0.903205  | -3.038469 |
| C | 3.120353  | -1.327389 | 2.304337  | H | -6.506756 | 1.645707  | -1.341924 |
| C | 2.306239  | -3.422373 | -2.253618 | H | -5.720534 | 2.701873  | 0.746390  |
| C | 0.798013  | -3.318052 | 1.229785  | H | -4.866277 | -0.778535 | 3.183911  |
| C | -0.627918 | -3.257842 | 1.446971  | H | -6.509987 | -1.514859 | 1.492040  |
| C | -1.280726 | -2.331428 | 0.712335  | H | -5.733701 | -2.574531 | -0.598235 |
| C | -2.727007 | -2.045340 | 0.874823  | H | 5.673326  | -1.565480 | 1.511792  |
| C | -3.161827 | -1.438200 | 2.066037  | H | 6.555718  | -2.491272 | -0.602106 |
| C | -4.527312 | -1.251614 | 2.267769  | H | 4.994975  | -3.313248 | -2.331752 |
| C | -5.449668 | -1.665229 | 1.321601  | H | 1.588036  | -4.126806 | -1.825695 |
| C | -5.012604 | -2.259072 | 0.148222  | H | 1.725542  | -2.627949 | -2.731169 |
| C | -3.657227 | -2.451769 | -0.095648 | H | 2.871514  | -3.938276 | -3.031877 |
| C | -2.190864 | -1.001559 | 3.136440  | H | 3.854042  | -0.641317 | 2.730857  |
| C | -3.210802 | -3.115031 | -1.371160 | H | 2.178738  | -0.789925 | 2.179820  |
| C | -1.272152 | 2.441384  | -0.576611 | H | 2.937162  | -2.126776 | 3.029085  |
| C | -2.720012 | 2.161122  | -0.735092 | H | 1.613068  | 4.224854  | 1.953067  |
| C | -3.160530 | 1.555928  | -1.925210 | H | 1.745748  | 2.724749  | 2.857187  |
| C | -4.527296 | 1.374782  | -2.123193 | H | 2.899076  | 4.029168  | 3.155434  |
| C | -5.445384 | 1.791865  | -1.174402 | H | 3.848612  | 0.729320  | -2.611198 |
| C | -5.002750 | 2.383756  | -0.002126 | H | 2.175802  | 0.884946  | -2.054611 |
| C | -3.645955 | 2.571025  | 0.238032  | H | 2.936991  | 2.218637  | -2.906373 |
| C | -2.194240 | 1.115558  | -2.998313 | H | -2.664304 | 2.526299  | 2.156831  |
| C | -3.193383 | 3.232320  | 1.512395  | H | -2.507886 | 4.059537  | 1.308823  |
| C | -0.617586 | 3.365245  | -1.312879 | H | -4.047371 | 3.619658  | 2.070867  |

|   |           |           |           |   |           |           |           |
|---|-----------|-----------|-----------|---|-----------|-----------|-----------|
| H | -2.684699 | 0.432395  | -3.695142 | C | -4.846886 | 1.273452  | -0.102218 |
| H | -1.822019 | 1.967501  | -3.574287 | C | -5.564988 | 0.096238  | -0.134507 |
| H | -1.321153 | 0.611650  | -2.577093 | C | -4.906679 | -1.113794 | -0.069541 |
| H | -4.067757 | -3.500183 | -1.926593 | C | -3.518663 | -1.191253 | 0.054100  |
| H | -2.681840 | -2.410839 | -2.017706 | C | -2.751181 | 2.671082  | -0.062262 |
| H | -2.527020 | -3.944112 | -1.169470 | C | -2.071687 | 2.812586  | -1.437452 |
| H | -2.676435 | -0.315644 | 3.833992  | C | -2.889042 | -2.612776 | 0.125244  |
| H | -1.821215 | -1.854838 | 3.712106  | C | -1.749784 | -2.806099 | -0.896194 |
| H | -1.316472 | -0.502023 | 2.712747  | C | 2.070859  | -2.812727 | -1.436709 |
| O | -0.194470 | 0.128455  | -0.407151 | C | 3.765526  | -3.830571 | 0.034377  |
| O | -0.204743 | -2.146601 | -2.139866 | C | 3.928435  | 3.705679  | -0.198811 |

## 8J

78

E= -1662.362976

|   |           |           |           |   |           |           |           |
|---|-----------|-----------|-----------|---|-----------|-----------|-----------|
| C | 3.518476  | 1.191371  | 0.054255  | C | -1.736881 | 2.931134  | 1.071820  |
| C | 2.793313  | -0.030328 | 0.119824  | H | 1.291778  | -0.010468 | 2.525429  |
| C | 3.456499  | -1.285398 | 0.013024  | H | -1.291716 | 0.009778  | 2.525598  |
| C | 4.847044  | -1.273131 | -0.102675 | H | 5.396977  | -2.198609 | -0.169896 |
| C | 5.564969  | -0.095819 | -0.134815 | H | 6.645539  | -0.121493 | -0.221875 |
| C | 4.906492  | 1.114106  | -0.069462 | H | 5.501358  | 2.012703  | -0.116532 |
| C | 1.326896  | 0.001827  | 0.376701  | H | -5.501629 | -2.012325 | -0.116860 |
| P | -0.000033 | 0.000089  | -0.751888 | H | -6.645565 | 0.122096  | -0.221426 |
| C | -1.326978 | -0.002146 | 0.376866  | H | -5.396702 | 2.199022  | -0.169151 |
| C | -0.721034 | -0.006033 | 1.605604  | H | 1.544011  | -3.770467 | -1.497649 |
| C | 0.720967  | 0.005381  | 1.605513  | H | 1.350998  | -2.024366 | -1.649987 |
| C | 2.751610  | -2.671125 | -0.062156 | H | 2.818579  | -2.783116 | -2.233828 |
| C | 1.738591  | -2.931519 | 1.072989  | H | 1.492345  | -3.996816 | 1.095657  |
| C | 2.888665  | 2.612834  | 0.125384  | H | 2.161698  | -2.664143 | 2.045574  |
| C | 2.376400  | 2.917634  | 1.546050  | H | 0.805101  | -2.392006 | 0.953630  |
| C | -2.793343 | 0.030312  | 0.119889  | H | 3.218239  | -4.775298 | -0.007561 |
| C | -3.456327 | 1.285506  | 0.013255  | H | 4.474978  | -3.840340 | -0.795683 |

|            |           |           |           |    |              |           |           |
|------------|-----------|-----------|-----------|----|--------------|-----------|-----------|
| H          | 4.323208  | -3.810548 | 0.975195  | E: | -1662.984534 |           |           |
| H          | 1.576137  | 3.873697  | -1.059450 | C  | 3.617821     | 1.124627  | 0.147797  |
| H          | 1.988896  | 2.351735  | -1.862415 | C  | 2.786007     | -0.039901 | 0.134398  |
| H          | 0.806228  | 2.396988  | -0.547748 | C  | 3.291140     | -1.279047 | -0.335972 |
| H          | 2.028867  | 3.954406  | 1.598236  | C  | 4.569902     | -1.287320 | -0.904297 |
| H          | 1.544157  | 2.276701  | 1.830545  | C  | 5.348728     | -0.157955 | -0.971166 |
| H          | 3.177398  | 2.790974  | 2.280027  | C  | 4.885175     | 1.021892  | -0.418345 |
| H          | 3.429694  | 4.677445  | -0.176500 | C  | 1.336784     | 0.063584  | 0.462673  |
| H          | 4.736772  | 3.746885  | 0.535167  | C  | 0.675039     | 0.072720  | 1.622537  |
| H          | 4.361708  | 3.577832  | -1.194582 | C  | -0.794749    | 0.136158  | 1.523574  |
| H          | -1.575533 | -3.873257 | -1.058931 | C  | -1.342454    | 0.143735  | 0.297925  |
| H          | -1.985243 | -2.349850 | -1.860593 | P  | 0.078413     | 0.223447  | -0.867721 |
| H          | -0.805168 | -2.398067 | -0.543614 | O  | 0.135640     | -0.666953 | -2.061182 |
| H          | -2.031215 | -3.954856 | 1.598834  | C  | 2.620587     | -2.683550 | -0.299919 |
| H          | -1.547534 | -2.277034 | 1.832763  | C  | 1.315030     | -2.823635 | 0.490825  |
| H          | -3.181316 | -2.792184 | 2.279313  | C  | 3.257770     | 2.477916  | 0.824393  |
| H          | -3.429763 | -4.677119 | -0.179123 | C  | 4.330501     | 3.555269  | 0.565972  |
| H          | -4.737673 | -3.747188 | 0.531742  | C  | -2.833989    | 0.139104  | 0.116775  |
| H          | -4.360484 | -3.576508 | -1.197374 | C  | -3.551945    | -1.056667 | 0.410237  |
| H          | -1.544508 | 3.770121  | -1.498800 | C  | -4.935146    | -0.959345 | 0.576395  |
| H          | -1.352348 | 2.023915  | -1.651425 | C  | -5.612326    | 0.229712  | 0.408739  |
| H          | -2.820156 | 2.783340  | -2.233882 | C  | -4.922741    | 1.352209  | -0.001001 |
| H          | -3.217224 | 4.775354  | -0.006353 | C  | -3.539865    | 1.341264  | -0.173178 |
| H          | -4.474649 | 3.841142  | -0.794222 | C  | -2.931423    | -2.481774 | 0.478640  |
| H          | -4.321874 | 3.810364  | 0.976550  | C  | -2.154225    | -2.767849 | -0.817684 |
| H          | -1.490702 | 3.996443  | 1.094576  | C  | -2.879826    | 2.622364  | -0.736912 |
| H          | -2.158735 | 2.663344  | 2.044827  | C  | -3.890488    | 3.766758  | -0.948854 |
| H          | -0.803464 | 2.391799  | 0.951067  | C  | -1.818832    | 3.209938  | 0.212238  |
| O          | -0.000251 | -0.000278 | -2.234653 | C  | -2.319526    | 2.301746  | -2.140746 |
|            |           |           |           | C  | -2.049165    | -2.712630 | 1.723110  |
| <b>8JH</b> |           |           |           | C  | -4.022380    | -3.571003 | 0.551318  |
| 79         |           |           |           | C  | 2.333561     | -3.140065 | -1.743520 |

|   |           |           |           |                          |           |           |           |
|---|-----------|-----------|-----------|--------------------------|-----------|-----------|-----------|
| C | 3.604958  | -3.668510 | 0.374275  | H                        | 3.037482  | 3.238762  | 2.849071  |
| C | 1.935513  | 3.090832  | 0.333588  | H                        | 2.411654  | 1.602799  | 2.651193  |
| C | 3.209132  | 2.279045  | 2.351217  | H                        | 4.156040  | 1.870545  | 2.714220  |
| H | -1.403398 | 0.149302  | 2.421558  | H                        | 4.017512  | 4.481223  | 1.054558  |
| H | 1.151901  | -0.014833 | 2.591830  | H                        | 5.303569  | 3.287328  | 0.983757  |
| H | -5.483892 | 2.256778  | -0.179190 | H                        | 4.450691  | 3.768327  | -0.499770 |
| H | -6.684571 | 0.273510  | 0.563489  | H                        | 1.912246  | -4.150711 | -1.733419 |
| H | -5.509529 | -1.833394 | 0.841605  | H                        | 1.615011  | -2.467882 | -2.216900 |
| H | 5.540198  | 1.878222  | -0.446634 | H                        | 3.241670  | -3.164264 | -2.350842 |
| H | 6.328425  | -0.194060 | -1.434047 | H                        | 3.139370  | -4.655745 | 0.443433  |
| H | 4.962253  | -2.206887 | -1.316702 | H                        | 4.538698  | -3.791019 | -0.175341 |
| H | -1.646510 | 3.095421  | -2.480700 | H                        | 3.851749  | -3.337377 | 1.387357  |
| H | -1.790973 | 1.352485  | -2.205944 | H                        | 1.029498  | -3.879711 | 0.491640  |
| H | -3.144764 | 2.231140  | -2.854384 | H                        | 1.421300  | -2.507995 | 1.530549  |
| H | -1.414582 | 4.134487  | -0.210821 | H                        | 0.488787  | -2.285610 | 0.035870  |
| H | -2.274787 | 3.449448  | 1.177337  | H                        | 0.179647  | 1.593765  | -1.181062 |
| H | -0.986646 | 2.545625  | 0.406030  | <b>{8J}</b> <sub>2</sub> |           |           |           |
| H | -3.361542 | 4.617213  | -1.387519 | 156                      |           |           |           |
| H | -4.691617 | 3.494498  | -1.639640 | E= -3324.813303          |           |           |           |
| H | -4.334726 | 4.104809  | -0.008480 | C                        | -3.551882 | -2.608571 | 1.377161  |
| H | -1.676628 | -3.750858 | -0.756564 | C                        | -3.380331 | -1.192828 | 1.466910  |
| H | -2.840013 | -2.778176 | -1.669707 | C                        | -4.424535 | -0.317373 | 1.032832  |
| H | -1.378940 | -2.042517 | -1.048417 | C                        | -5.512859 | -0.894193 | 0.372049  |
| H | -1.839705 | -3.781834 | 1.824364  | C                        | -5.651964 | -2.255815 | 0.221820  |
| H | -1.092584 | -2.203686 | 1.667561  | C                        | -4.699848 | -3.097119 | 0.754683  |
| H | -2.567327 | -2.385517 | 2.629727  | C                        | -2.105520 | -0.662350 | 2.056151  |
| H | -3.536361 | -4.547129 | 0.478834  | C                        | -1.908547 | -0.462460 | 3.379082  |
| H | -4.572008 | -3.553514 | 1.496785  | C                        | -0.659137 | 0.158810  | 3.783230  |
| H | -4.735012 | -3.498753 | -0.273924 | C                        | 0.165059  | 0.506123  | 2.775337  |
| H | 1.844457  | 4.113798  | 0.709644  | C                        | 1.495347  | 1.179540  | 2.772279  |
| H | 1.901872  | 3.132694  | -0.758669 | C                        | 1.585803  | 2.595837  | 2.671772  |
| H | 1.069358  | 2.545478  | 0.693358  | C                        | 2.814618  | 3.134292  | 2.293575  |

|   |           |           |           |   |           |           |           |
|---|-----------|-----------|-----------|---|-----------|-----------|-----------|
| C | 3.925991  | 2.343511  | 2.085219  | C | 2.033258  | -3.429267 | -3.143838 |
| C | 3.863064  | 0.990677  | 2.347837  | C | 4.854500  | 1.078486  | -1.752481 |
| C | 2.667640  | 0.378159  | 2.723127  | C | 6.086830  | 1.742505  | -1.102007 |
| C | 0.479921  | 3.593221  | 3.121277  | C | 1.849249  | -0.393421 | -3.218516 |
| C | 0.337644  | 3.458462  | 4.650553  | C | 0.546866  | 0.190657  | -3.579712 |
| C | 2.716275  | -1.105027 | 3.169631  | C | -3.906623 | -2.132744 | -2.977496 |
| C | 4.134864  | -1.687289 | 3.057134  | C | -1.965226 | -1.798302 | -4.468063 |
| C | -4.531272 | 1.224726  | 1.273787  | C | -0.832126 | 4.004687  | -1.215856 |
| C | -4.242202 | 1.605107  | 2.737827  | C | 0.528270  | 3.365445  | -3.224096 |
| C | -2.561203 | -3.667503 | 1.938455  | C | 3.002587  | -5.038469 | -1.571767 |
| C | -3.053040 | -5.108230 | 1.689746  | C | 1.196245  | -3.578657 | -0.775482 |
| P | -0.822824 | 0.342875  | 1.252222  | C | 5.212018  | 0.828774  | -3.232978 |
| P | 0.776674  | 0.372386  | -1.043669 | C | 3.737278  | 2.121743  | -1.679580 |
| C | -0.256636 | 0.547420  | -2.576351 | C | 0.880848  | 5.054285  | 2.838687  |
| C | -1.645143 | 1.073927  | -2.782304 | C | -0.898294 | 3.415269  | 2.466022  |
| C | -2.697302 | 0.128327  | -2.994260 | C | 2.332547  | -1.198233 | 4.659179  |
| C | -3.980304 | 0.620010  | -3.235568 | C | 1.810905  | -2.010252 | 2.326973  |
| C | -4.247716 | 1.970613  | -3.293158 | C | -3.644576 | 2.029103  | 0.310321  |
| C | -3.220897 | 2.871016  | -3.125706 | C | -5.971269 | 1.729282  | 1.017994  |
| C | -1.903841 | 2.472337  | -2.883628 | C | -1.208078 | -3.566221 | 1.232925  |
| C | -2.543352 | -1.418628 | -3.090338 | C | -2.383028 | -3.553699 | 3.468447  |
| C | -1.678916 | -2.028479 | -1.985591 | H | -2.678709 | -0.684649 | 4.109466  |
| C | -0.893118 | 3.644144  | -2.709432 | H | -0.450189 | 0.351619  | 4.828782  |
| C | -1.362122 | 4.901697  | -3.478240 | H | 0.271635  | 0.314898  | -4.620049 |
| C | 2.139637  | -0.533138 | -1.921889 | H | 2.527275  | -0.720061 | -3.997221 |
| C | 3.407643  | -1.134980 | -1.387903 | H | -4.800459 | -0.062552 | -3.389481 |
| C | 3.481977  | -2.547920 | -1.182230 | H | -5.257746 | 2.321006  | -3.474574 |
| C | 4.606012  | -3.054251 | -0.528700 | H | -3.460052 | 3.920864  | -3.184604 |
| C | 5.641882  | -2.243469 | -0.120567 | H | 4.687120  | -4.109707 | -0.326550 |
| C | 5.624092  | -0.907587 | -0.453285 | H | 6.483524  | -2.661625 | 0.420318  |
| C | 4.554922  | -0.321528 | -1.134599 | H | 6.485885  | -0.315619 | -0.190608 |
| C | 2.440262  | -3.602621 | -1.662334 | H | 2.920317  | 4.198040  | 2.148500  |

|   |           |           |           |   |           |           |           |
|---|-----------|-----------|-----------|---|-----------|-----------|-----------|
| H | 4.857589  | 2.795504  | 1.763189  | H | -0.185492 | 4.876065  | -1.065753 |
| H | 4.764886  | 0.405984  | 2.245741  | H | -1.828828 | 4.245879  | -0.834923 |
| H | -6.297445 | -0.268459 | -0.021436 | H | -0.414957 | 3.182197  | -0.637008 |
| H | -6.517180 | -2.662768 | -0.289958 | H | 1.089004  | 4.303996  | -3.233919 |
| H | -4.863591 | -4.159432 | 0.669255  | H | 1.072552  | 2.690779  | -2.576310 |
| H | -3.879574 | 3.095355  | 0.396881  | H | 0.519364  | 2.968776  | -4.243197 |
| H | -2.583560 | 1.910717  | 0.506225  | H | -0.565522 | 5.648252  | -3.441885 |
| H | -3.833220 | 1.725053  | -0.719615 | H | -1.571785 | 4.682674  | -4.529307 |
| H | -4.502051 | 2.655566  | 2.896074  | H | -2.243129 | 5.372056  | -3.037821 |
| H | -4.845245 | 1.000524  | 3.422439  | H | -0.386829 | 4.188267  | 5.026838  |
| H | -3.200239 | 1.490415  | 3.011356  | H | -0.008144 | 2.464822  | 4.935198  |
| H | -6.021173 | 2.780696  | 1.310530  | H | 1.296064  | 3.638207  | 5.145392  |
| H | -6.249351 | 1.685066  | -0.037749 | H | -1.533414 | 4.266866  | 2.728685  |
| H | -6.715313 | 1.184046  | 1.605284  | H | -0.818777 | 3.373443  | 1.381056  |
| H | -1.967852 | -4.488723 | 3.855817  | H | -1.412189 | 2.523488  | 2.809483  |
| H | -1.696982 | -2.758380 | 3.746040  | H | 0.077948  | 5.709965  | 3.184784  |
| H | -3.341697 | -3.380766 | 3.965898  | H | 1.788402  | 5.352145  | 3.368705  |
| H | -2.293400 | -5.798238 | 2.065549  | H | 1.019242  | 5.235422  | 1.768985  |
| H | -3.985395 | -5.328459 | 2.217484  | H | 2.453112  | -2.228945 | 5.008312  |
| H | -3.187613 | -5.325795 | 0.627136  | H | 2.979946  | -0.556053 | 5.263104  |
| H | -0.489335 | -4.248689 | 1.696717  | H | 1.299977  | -0.907529 | 4.838271  |
| H | -1.315585 | -3.847411 | 0.184879  | H | 1.995568  | -3.059394 | 2.580716  |
| H | -0.783625 | -2.567584 | 1.262806  | H | 0.755347  | -1.818496 | 2.496447  |
| H | -1.737255 | -3.119289 | -2.041923 | H | 2.019741  | -1.876969 | 1.265154  |
| H | -0.629619 | -1.773737 | -2.082554 | H | 4.115114  | -2.724960 | 3.401397  |
| H | -2.025124 | -1.728181 | -0.995686 | H | 4.490613  | -1.690222 | 2.026617  |
| H | -2.002316 | -2.885082 | -4.594608 | H | 4.853866  | -1.149864 | 3.681582  |
| H | -2.547128 | -1.341760 | -5.273559 | H | 0.438503  | -4.253540 | -1.184044 |
| H | -0.926219 | -1.491142 | -4.578179 | H | 1.440708  | -3.916161 | 0.233466  |
| H | -3.731550 | -3.210689 | -2.938150 | H | 0.752892  | -2.590845 | -0.686186 |
| H | -4.434327 | -1.850778 | -2.064738 | H | 1.626894  | -4.372945 | -3.517134 |
| H | -4.553478 | -1.950815 | -3.839064 | H | 1.258649  | -2.679872 | -3.279745 |



|   |          |           |           |   |           |           |           |
|---|----------|-----------|-----------|---|-----------|-----------|-----------|
| H | 2.893159 | -3.168030 | -3.766959 | C | -1.103317 | 0.217952  | -0.876907 |
| H | 2.246768 | -5.727063 | -1.956995 | C | -4.929157 | -1.111983 | 3.638670  |
| H | 3.908721 | -5.167099 | -2.170670 | C | -5.018405 | -1.503958 | 4.981176  |
| H | 3.210747 | -5.347120 | -0.545276 | C | -6.181984 | -2.076064 | 5.481007  |
| H | 2.914366 | 1.884029  | -2.344291 | C | -7.274883 | -2.270111 | 4.653127  |
| H | 3.337507 | 2.232338  | -0.673166 | C | -7.209005 | -1.884706 | 3.324741  |
| H | 4.132307 | 3.088261  | -2.006425 | C | -6.048170 | -1.312167 | 2.819079  |
| H | 6.207688 | 2.741103  | -1.527460 | C | -3.855265 | -1.285654 | 5.923922  |
| H | 5.960014 | 1.854640  | -0.022473 | C | -6.024765 | -0.881626 | 1.368788  |
| H | 7.017219 | 1.204019  | -1.294908 | H | -1.684145 | 2.106271  | 2.379045  |
| H | 5.517560 | 1.768100  | -3.704928 | H | -3.991178 | 1.590833  | 3.431759  |
| H | 6.034025 | 0.113287  | -3.324487 | H | -8.060145 | -2.029406 | 2.673490  |
| H | 4.358488 | 0.439151  | -3.789846 | H | -8.178899 | -2.720151 | 5.043790  |
| O | 0.049682 | -0.552577 | 0.088173  | H | -6.227848 | -2.370830 | 6.520487  |
| O | 1.148533 | 1.667273  | -0.422902 | H | 1.450901  | 0.095577  | -1.666463 |

## 8K

42

E= -2381.574566

|   |           |           |           |   |           |           |           |
|---|-----------|-----------|-----------|---|-----------|-----------|-----------|
| C | 0.115391  | 0.064908  | 0.006600  | F | -7.165346 | -1.204054 | 0.740636  |
| C | -0.021037 | -0.015410 | 1.399055  | F | -5.878425 | 0.446746  | 1.246679  |
| C | 1.144617  | -0.127024 | 2.168942  | F | -5.029088 | -1.458351 | 0.680324  |
| C | 2.396485  | -0.159472 | 1.566591  | F | -2.733856 | -1.885776 | 5.499713  |
| C | 2.509322  | -0.084120 | 0.188529  | F | -3.577637 | 0.018292  | 6.077501  |
| C | 1.370024  | 0.032036  | -0.589929 | F | -4.114262 | -1.772155 | 7.146831  |
| C | -1.356305 | 0.003537  | 2.036270  | F | -0.771886 | 0.224418  | -2.176743 |
| C | -2.061824 | 1.096957  | 2.469289  | F | -1.984991 | -0.778212 | -0.708749 |
| C | -3.344546 | 0.810371  | 3.054603  | F | -1.749967 | 1.369151  | -0.637157 |
| C | -3.686318 | -0.517036 | 3.099474  | F | 0.549654  | 0.940388  | 4.194191  |
| P | -2.354129 | -1.369101 | 2.389616  | F | 0.309237  | -1.205904 | 4.111100  |
| O | -2.137694 | -2.810251 | 2.158307  | F | 2.277629  | -0.344113 | 4.230161  |
| C | 1.065064  | -0.186375 | 3.678733  |   |           |           |           |

## 8KH

43

|                 |           |           |                          |           |           |
|-----------------|-----------|-----------|--------------------------|-----------|-----------|
| E: -2382.200664 |           |           | F 0.185102               | -2.665344 | 3.192300  |
| P -0.082584     | 0.436566  | -0.085019 | F -1.978630              | 3.510697  | 3.425900  |
| C -0.018742     | 0.092115  | 1.712788  | F -0.069902              | 2.734786  | 2.805254  |
| C 1.706121      | 0.091403  | -0.274845 | H 3.276495               | -0.288224 | 1.119098  |
| O -1.089343     | -0.209760 | -0.958507 | H 1.582362               | -0.287509 | 3.071318  |
| C 2.442306      | 0.026293  | -1.558260 | H -3.421892              | 1.976524  | 4.292954  |
| C 2.819494      | 1.173444  | -2.273068 | H -4.268722              | -0.238977 | 4.989120  |
| C 3.501212      | 1.072268  | -3.480179 | H -3.138525              | -2.284590 | 4.180779  |
| C 3.822449      | -0.168299 | -4.001894 | H 3.782551               | 1.973278  | -4.008022 |
| C 3.463634      | -1.312818 | -3.311592 | H 4.351567               | -0.242873 | -4.943482 |
| C 2.780145      | -1.222058 | -2.105132 | H 3.709185               | -2.287693 | -3.710012 |
| C 2.477518      | 2.557467  | -1.773484 | H -0.086822              | 1.845208  | -0.089176 |
| F 2.781958      | 2.733462  | -0.480387 |                          |           |           |
| C 2.439609      | -2.509231 | -1.383658 | <b>{8K}</b> <sub>2</sub> |           |           |
| F 2.671485      | -3.580175 | -2.158715 | 84                       |           |           |
| C 2.223078      | -0.108847 | 0.941152  | E= -4763.245427          |           |           |
| C 1.257877      | -0.108444 | 2.053393  | C -3.481723              | -2.695852 | 0.290391  |
| C -1.185723     | 0.027896  | 2.622390  | C -2.769972              | -1.797347 | 1.100977  |
| C -1.679998     | -1.220073 | 3.034557  | C -3.435644              | -0.775869 | 1.795478  |
| C -2.778315     | -1.310004 | 3.881040  | C -4.822331              | -0.695172 | 1.697694  |
| C -3.410914     | -0.165030 | 4.332757  | C -5.536027              | -1.596451 | 0.925431  |
| C -2.939187     | 1.075164  | 3.940631  | C -4.867048              | -2.582757 | 0.216251  |
| C -1.839975     | 1.175525  | 3.095784  | C -1.307576              | -1.971140 | 1.283160  |
| C -1.013958     | -2.507710 | 2.596755  | C -0.733689              | -2.794214 | 2.174220  |
| F -1.749020     | -3.578232 | 2.936003  | C 0.733985               | -2.794067 | 2.174228  |
| C -1.393064     | 2.559226  | 2.686234  | C 1.307757               | -1.970872 | 1.283191  |
| F -1.712514     | 2.816339  | 1.404286  | C 2.770177               | -1.796896 | 1.101284  |
| F 3.197739      | -2.666909 | -0.280194 | C 3.435591               | -0.775403 | 1.796014  |
| F 1.163773      | -2.569814 | -1.004758 | C 4.822300               | -0.694604 | 1.698597  |
| F 3.127609      | 3.508400  | -2.457877 | C 5.536260               | -1.595791 | 0.926472  |
| F 1.163434      | 2.814967  | -1.909167 | C 4.867531               | -2.582088 | 0.217043  |
| F -0.818236     | -2.569220 | 1.280366  | C 3.482196               | -2.695279 | 0.290812  |

|   |           |           |           |   |           |           |           |
|---|-----------|-----------|-----------|---|-----------|-----------|-----------|
| C | 2.684355  | 0.195073  | 2.669813  | H | 5.342922  | 0.095560  | 2.228559  |
| C | 2.767191  | -3.774156 | -0.481072 | H | 6.615943  | -1.517567 | 0.860813  |
| C | -2.684727 | 0.194675  | 2.669475  | H | 5.425272  | -3.279258 | -0.400241 |
| C | -2.766476 | -3.774802 | -0.481169 | H | -5.343144 | 0.095012  | 2.227437  |
| P | 0.000066  | -1.304615 | 0.192494  | H | -6.615699 | -1.518298 | 0.859492  |
| O | -0.000208 | 0.315600  | 0.607711  | H | -5.424580 | -3.280021 | -0.401115 |
| P | 0.000008  | 1.762330  | -0.099721 | H | -5.444440 | -0.292786 | -1.862505 |
| O | 0.000324  | 2.800793  | 0.952330  | H | -6.646619 | 1.531803  | -0.713795 |
| C | 1.337973  | 1.777959  | -1.345316 | H | -5.388342 | 3.463422  | 0.177298  |
| C | 0.739250  | 1.852484  | -2.539518 | H | 5.444192  | -0.293311 | -1.861945 |
| C | -0.739680 | 1.852590  | -2.539366 | H | 6.646365  | 1.531627  | -0.713763 |
| C | -1.338204 | 1.778205  | -1.345045 | H | 5.388133  | 3.463728  | 0.176334  |
| C | -2.801057 | 1.695742  | -1.117250 | F | 2.140291  | 4.399671  | -0.759547 |
| C | -3.512717 | 0.594158  | -1.628536 | F | 2.078630  | 3.734299  | 0.858607  |
| C | -4.895668 | 0.560136  | -1.479750 | F | 3.468752  | 4.720843  | 0.363383  |
| C | -5.569308 | 1.579001  | -0.828855 | F | 3.489823  | -1.420497 | -2.359338 |
| C | -4.861718 | 2.656595  | -0.321671 | F | 1.896564  | -0.835919 | -1.874644 |
| C | -3.478755 | 2.739524  | -0.461478 | F | 2.606536  | -0.286818 | -3.386543 |
| C | -2.836749 | -0.546090 | -2.349138 | F | 2.267892  | -4.479516 | 0.188742  |
| C | -2.755218 | 3.963533  | 0.034992  | F | 1.995470  | -3.351713 | -1.131851 |
| C | 2.800839  | 1.695577  | -1.117551 | F | 3.466399  | -4.334069 | -1.104784 |
| C | 3.478549  | 2.739643  | -0.462236 | F | 3.302486  | 1.065725  | 2.895181  |
| C | 4.861499  | 2.656704  | -0.322306 | F | 1.763952  | 0.542742  | 2.200314  |
| C | 5.569069  | 1.578846  | -0.828955 | F | 2.402194  | -0.275653 | 3.617121  |
| C | 4.895436  | 0.559765  | -1.479517 | F | -1.994168 | -3.352502 | -1.131335 |
| C | 3.512498  | 0.593797  | -1.628410 | F | -2.267869 | -4.480418 | 0.188894  |
| C | 2.755065  | 3.963962  | 0.033565  | F | -3.465415 | -4.334412 | -1.105455 |
| C | 2.836551  | -0.546580 | -2.348808 | F | -3.302869 | 1.065444  | 2.894366  |
| H | 1.292480  | 1.903313  | -3.471018 | F | -2.403103 | -0.275922 | 3.617006  |
| H | -1.293080 | 1.903421  | -3.470762 | F | -1.764046 | 0.542141  | 2.200373  |
| H | -1.305882 | -3.417190 | 2.854644  | F | -3.468865 | 4.720312  | 0.365128  |
| H | 1.306310  | -3.416985 | 2.854597  | F | -2.078879 | 3.733415  | 0.859990  |

F -2.140305 4.399585 -0.757819  
F -3.490320 -1.419762 -2.360447  
F -2.606090 -0.285974 -3.386636  
F -1.897124 -0.835958 -1.874573

**8L**

78

E= -5235.015639

C 3.714861 0.002336 0.045705  
C 2.636707 -0.922810 0.111494  
C 2.863058 -2.324175 0.004860  
C 4.184321 -2.757837 -0.110613  
C 5.241442 -1.872399 -0.142902  
C 5.005064 -0.515316 -0.077936  
C 1.257873 -0.422714 0.368471  
C 0.685050 -0.225085 1.597209  
C -0.684744 0.225649 1.597118  
C -1.257660 0.422958 0.368306  
P 0.000019 -0.000111 -0.760283  
O 0.000343 0.000167 -2.243048  
C 1.751521 -3.411161 -0.070657  
C 0.707345 -3.332881 1.063425  
C 3.573355 1.550601 0.116849  
C 4.907758 2.252981 -0.209587  
C -2.636640 0.922783 0.111429  
C -3.714688 -0.002539 0.045860  
C -5.004954 0.514929 -0.077856  
C -5.241524 1.871964 -0.143209  
C -4.184541 2.757551 -0.111069  
C -2.863222 2.324096 0.004630  
C -3.572983 -1.550809 0.116989  
C -2.557263 -2.098362 -0.906270

C -1.751881 3.411307 -0.070550  
C -2.341349 4.834285 0.025983  
C -0.708809 3.333760 1.064595  
C -1.061619 3.327569 -1.445103  
C -3.185225 -2.003537 1.537655  
C -4.907845 -2.253359 -0.207206  
C 1.062482 -3.327732 -1.445847  
C 2.340568 -4.834226 0.027025  
C 2.555908 2.098401 -0.904589  
C 3.187956 2.003177 1.538204  
H -1.220454 0.423366 2.517034  
H 1.220649 -0.422724 2.517203  
H -4.409322 3.810362 -0.178290  
H -6.257031 2.242150 -0.230269  
H -5.856143 -0.145994 -0.124926  
H 5.856312 0.145518 -0.125255  
H 6.256896 -2.242761 -0.229821  
H 4.408962 -3.810697 -0.177546  
F -0.255940 4.066294 -1.506043  
F -0.631962 2.350273 -1.658382  
F -1.779481 3.538841 -2.242222  
F -0.134544 4.264198 1.087263  
F -1.195237 3.215876 2.037180  
F 0.002888 2.523844 0.945236  
F -1.520470 5.554140 -0.015955  
F -3.010351 5.070618 -0.804077  
F -2.876101 4.993815 0.966801  
F -2.733074 -3.165447 -1.067846  
F -2.636979 -1.591438 -1.870810  
F -1.531011 -2.012852 -0.556144  
F -3.187819 -3.097003 1.589840  
F -2.191618 -1.662701 1.822150

|                 |           |           |           |   |           |           |           |
|-----------------|-----------|-----------|-----------|---|-----------|-----------|-----------|
| F               | -3.903544 | -1.627163 | 2.271632  | C | 4.898133  | -0.757829 | -1.254284 |
| F               | -4.746378 | -3.333637 | -0.184895 | C | 5.274297  | 0.408333  | -1.877221 |
| F               | -5.686846 | -2.033670 | 0.526772  | C | 4.624560  | 1.575951  | -1.550546 |
| F               | -5.277404 | -1.993558 | -1.202977 | C | 3.488465  | 1.580575  | -0.742126 |
| F               | 2.732394  | 3.165192  | -1.067326 | C | 3.639733  | -2.173175 | 0.347714  |
| F               | 2.632947  | 1.590790  | -1.868988 | C | 3.263127  | -3.291580 | -0.673170 |
| F               | 1.530386  | 2.014182  | -0.552009 | F | 4.342766  | -3.694004 | -1.360702 |
| F               | 3.190221  | 3.096646  | 1.590439  | C | 2.877289  | 2.980150  | -0.426140 |
| F               | 2.194958  | 1.661904  | 1.824368  | C | 3.897822  | 4.156459  | -0.726989 |
| F               | 3.907677  | 1.627022  | 2.270918  | F | 4.015779  | 4.371383  | -2.044887 |
| F               | 4.746373  | 3.333274  | -0.187518 | C | 0.851267  | -0.058818 | -1.403497 |
| F               | 5.687830  | 2.033636  | 0.523347  | C | -0.607138 | -0.161902 | -1.417893 |
| F               | 5.275854  | 1.992664  | -1.205769 | C | -2.758387 | -0.266069 | -0.379060 |
| F               | 0.256554  | -4.066157 | -1.507195 | C | -3.695541 | 0.809315  | -0.511240 |
| F               | 0.633419  | -2.350309 | -1.659820 | C | -4.705611 | 0.692060  | -1.469156 |
| F               | 1.780937  | -3.539590 | -2.242277 | C | -4.891797 | -0.450530 | -2.208093 |
| F               | 1.519524  | -5.553900 | -0.014748 | C | -4.196108 | -1.578910 | -1.845778 |
| F               | 3.009816  | -5.071304 | -0.802617 | C | -3.189169 | -1.542477 | -0.883537 |
| F               | 2.874930  | -4.993246 | 0.968155  | C | -3.841186 | 2.124860  | 0.318591  |
| F               | 0.133139  | -4.263351 | 1.086181  | C | -5.180955 | 2.025018  | 1.155104  |
| F               | 1.192719  | -3.214203 | 2.036432  | F | -5.006814 | 1.178633  | 2.168326  |
| F               | -0.004340 | -2.523156 | 0.942672  | C | -2.641420 | -2.946459 | -0.459970 |
|                 |           |           |           | C | -2.334363 | -3.025921 | 1.075390  |
| <b>8LH</b>      |           |           |           | F | -3.479338 | -3.097620 | 1.761065  |
| 79              |           |           |           | C | 1.629391  | 3.286773  | -1.336662 |
| E: -5235.629154 |           |           |           | F | 0.496360  | 2.776323  | -0.860750 |
| P               | 0.059660  | 0.342748  | 1.021485  | C | 2.550047  | 3.140791  | 1.108852  |
| C               | 1.444658  | 0.144569  | -0.219880 | F | 3.609536  | 3.592634  | 1.777394  |
| C               | -1.256596 | -0.064118 | -0.246525 | F | 1.414900  | 4.591500  | -1.490124 |
| O               | 0.084111  | -0.276240 | 2.362230  | F | 1.828023  | 2.764718  | -2.549142 |
| C               | 2.947822  | 0.330002  | -0.306645 | C | 4.991880  | -2.572046 | 1.076966  |
| C               | 3.800340  | -0.810912 | -0.394139 | F | 5.172393  | -1.790055 | 2.139323  |

|   |           |           |           |                          |           |           |           |
|---|-----------|-----------|-----------|--------------------------|-----------|-----------|-----------|
| C | 2.577053  | -2.147077 | 1.497674  | H                        | -1.120210 | -0.338148 | -2.356653 |
| F | 1.355484  | -2.292764 | 0.993185  | H                        | 1.404370  | -0.121716 | -2.333985 |
| F | 4.948582  | -3.841189 | 1.480264  | H                        | -4.442302 | -2.496996 | -2.350165 |
| F | 6.092893  | -2.464755 | 0.331780  | H                        | -5.631860 | -0.484766 | -2.996513 |
| C | -2.724965 | 2.411273  | 1.359200  | H                        | -5.366507 | 1.519413  | -1.660239 |
| F | -1.663675 | 2.936715  | 0.737408  | H                        | 5.461987  | -1.649300 | -1.464630 |
| C | -3.905538 | 3.383886  | -0.622039 | H                        | 6.103557  | 0.417835  | -2.572286 |
| F | -5.120079 | 3.542353  | -1.167407 | H                        | 5.004042  | 2.483419  | -1.984320 |
| F | -3.091355 | 3.277390  | 2.296737  | H                        | -0.013818 | 1.727781  | 1.034219  |
| F | -2.354229 | 1.298085  | 1.985945  |                          |           |           |           |
| C | -3.739364 | -4.069852 | -0.697599 | <b>{8L}</b> <sub>2</sub> |           |           |           |
| F | -3.800919 | -4.427269 | -1.991793 | 156                      |           |           |           |
| C | -1.388065 | -3.378078 | -1.286414 | E= -10470.0948458        |           |           |           |
| F | -0.273955 | -2.860339 | -0.785470 | C                        | -4.690834 | -0.050704 | -0.408754 |
| F | -3.462593 | -5.173878 | -0.013148 | C                        | -3.669077 | 0.866958  | -0.803755 |
| F | -4.954369 | -3.672943 | -0.331295 | C                        | -3.820269 | 2.260140  | -0.520188 |
| F | -1.224097 | -4.699388 | -1.318695 | C                        | -4.857855 | 2.644480  | 0.329885  |
| F | -1.501598 | -2.959000 | -2.552834 | C                        | -5.744790 | 1.733636  | 0.859674  |
| F | -1.603248 | -4.101846 | 1.366106  | C                        | -5.676223 | 0.416769  | 0.463746  |
| F | -1.680004 | -1.973036 | 1.521406  | C                        | -2.462685 | 0.395725  | -1.563855 |
| F | -3.638988 | 4.512393  | 0.030087  | C                        | -2.379681 | 0.327180  | -2.895583 |
| F | -3.027377 | 3.264139  | -1.615103 | C                        | -1.112439 | -0.129474 | -3.490037 |
| F | -5.527164 | 3.214158  | 1.647500  | C                        | -0.128936 | -0.450714 | -2.647924 |
| F | -6.222707 | 1.588520  | 0.452114  | C                        | 1.243986  | -0.848081 | -3.100431 |
| F | 1.545753  | 3.997359  | 1.297734  | C                        | 2.168563  | 0.191508  | -3.432901 |
| F | 2.220473  | 1.992452  | 1.692726  | C                        | 3.429174  | -0.179033 | -3.901553 |
| F | 3.478473  | 5.295486  | -0.182061 | C                        | 3.789640  | -1.498717 | -4.067241 |
| F | 5.114979  | 3.914184  | -0.249283 | C                        | 2.879065  | -2.489558 | -3.780521 |
| F | 2.744129  | -3.132008 | 2.376360  | C                        | 1.592471  | -2.214578 | -3.310153 |
| F | 2.665521  | -1.002481 | 2.159905  | C                        | 1.878774  | 1.721866  | -3.427410 |
| F | 2.744063  | -4.365563 | -0.088337 | C                        | 1.053373  | 2.098485  | -4.673756 |
| F | 2.379608  | -2.839665 | -1.563323 | C                        | 0.720342  | -3.474497 | -3.032606 |

|   |           |           |           |   |           |           |           |
|---|-----------|-----------|-----------|---|-----------|-----------|-----------|
| C | -0.783958 | -3.301381 | -3.297197 | C | 6.175112  | -1.261394 | -0.083759 |
| C | -2.958774 | 3.416877  | -1.109977 | C | 0.707848  | -3.654204 | 4.429711  |
| C | -1.587743 | 3.469036  | -0.437507 | C | 0.001848  | -5.226253 | 2.653535  |
| C | -4.976174 | -1.448749 | -1.037734 | C | -3.695687 | 1.198069  | 3.721939  |
| C | -3.783081 | -2.393792 | -1.196816 | C | -1.621103 | 0.810126  | 4.986720  |
| P | -0.906264 | -0.419302 | -0.962026 | C | 4.748604  | -1.347136 | 1.896301  |
| O | -1.066984 | -1.762415 | -0.353274 | C | 3.794822  | -1.735502 | -0.420850 |
| O | -0.078407 | 0.524520  | 0.081523  | C | 2.874766  | 5.271454  | 1.382018  |
| P | 1.042100  | -0.332774 | 1.044656  | C | 1.107860  | 3.593235  | 1.154009  |
| C | 0.334668  | -0.633927 | 2.697317  | C | 1.162527  | 2.215790  | -2.169371 |
| C | -0.920339 | -1.418921 | 2.875944  | C | 3.181064  | 2.546368  | -3.501155 |
| C | -0.913573 | -2.833337 | 2.722442  | C | 1.154486  | -4.659182 | -3.927317 |
| C | -2.141302 | -3.462035 | 2.521507  | C | 0.934958  | -3.891199 | -1.568099 |
| C | -3.330945 | -2.763110 | 2.533824  | C | -2.788903 | 3.331383  | -2.644380 |
| C | -3.333044 | -1.419949 | 2.848466  | C | -3.610509 | 4.794871  | -0.860086 |
| C | -2.144493 | -0.720284 | 3.055529  | C | -6.027976 | -2.238905 | -0.230243 |
| C | 0.326765  | -3.746913 | 2.938648  | C | -5.591311 | -1.178912 | -2.427281 |
| C | 1.559731  | -3.427980 | 2.079243  | H | 3.255891  | 0.749807  | 3.611972  |
| C | -2.236319 | 0.736594  | 3.575767  | H | 1.265524  | -0.499225 | 4.629777  |
| C | -1.556741 | 1.745493  | 2.643300  | H | -1.003349 | -0.192919 | -4.565939 |
| C | 1.283459  | -0.252521 | 3.574870  | H | -3.200432 | 0.621346  | -3.537945 |
| C | 2.396014  | 0.487889  | 3.005351  | H | 4.156062  | 0.576633  | -4.152225 |
| C | 2.355928  | 0.750355  | 1.679302  | H | 4.780545  | -1.754202 | -4.425966 |
| C | 3.470166  | 1.409059  | 0.918815  | H | 3.187698  | -3.512181 | -3.928288 |
| C | 3.511836  | 2.836594  | 0.871678  | H | -4.987954 | 3.681269  | 0.593652  |
| C | 4.499214  | 3.443788  | 0.096833  | H | -6.516307 | 2.058469  | 1.548889  |
| C | 5.414202  | 2.706879  | -0.622903 | H | -6.433314 | -0.256103 | 0.832756  |
| C | 5.410103  | 1.333902  | -0.518743 | H | -2.184805 | -4.525179 | 2.343711  |
| C | 4.494668  | 0.642610  | 0.279943  | H | -4.264065 | -3.282089 | 2.344551  |
| C | 2.546368  | 3.785866  | 1.636260  | H | -4.282831 | -0.911898 | 2.921701  |
| C | 2.632216  | 3.603458  | 3.167577  | H | 6.166255  | 0.792297  | -1.063580 |
| C | 4.761517  | -0.892070 | 0.425106  | H | 6.148293  | 3.204585  | -1.247022 |

|   |           |           |           |   |           |           |           |
|---|-----------|-----------|-----------|---|-----------|-----------|-----------|
| H | 4.561932  | 4.518601  | 0.037993  | F | -1.265847 | -2.699288 | -2.538045 |
| F | 4.124626  | -2.779924 | -0.425366 | F | -0.974496 | -2.869865 | -4.283849 |
| F | 2.774565  | -1.715919 | -0.050930 | F | 0.436464  | -5.472404 | -3.799439 |
| F | 3.786550  | -1.380337 | -1.451670 | F | 1.170138  | -4.386124 | -4.986499 |
| F | 5.113396  | -2.376212 | 1.959211  | F | 2.130471  | -5.067073 | -3.658135 |
| F | 5.406331  | -0.717272 | 2.503377  | F | 1.539936  | -4.331648 | 4.648268  |
| F | 3.760157  | -1.332317 | 2.339485  | F | 1.015941  | -2.645083 | 4.702964  |
| F | 6.355691  | -2.314225 | 0.145320  | F | -0.138675 | -3.933122 | 5.063230  |
| F | 6.271116  | -1.156325 | -1.167098 | F | 2.294909  | -4.230394 | 2.194271  |
| F | 6.960139  | -0.675054 | 0.401763  | F | 1.299536  | -3.355072 | 1.024631  |
| F | 2.213731  | 4.485050  | 3.661905  | F | 2.050859  | -2.507859 | 2.378407  |
| F | 2.066485  | 2.742733  | 3.513047  | F | 0.900194  | -5.822076 | 2.833303  |
| F | 3.670375  | 3.496390  | 3.494950  | F | -0.779511 | -5.619627 | 3.307774  |
| F | 2.135134  | 5.879822  | 1.908537  | F | -0.296047 | -5.380949 | 1.612596  |
| F | 3.860882  | 5.552512  | 1.762645  | F | -1.763823 | 1.813716  | 5.400527  |
| F | 2.814809  | 5.536997  | 0.323492  | F | -2.107226 | 0.093742  | 5.655094  |
| F | 0.423526  | 4.194529  | 1.760299  | F | -0.553390 | 0.603349  | 4.982628  |
| F | 1.018648  | 3.919285  | 0.117303  | F | -1.779651 | 2.765261  | 2.974310  |
| F | 0.774630  | 2.561313  | 1.203228  | F | -0.475854 | 1.639552  | 2.630844  |
| F | 1.124150  | 3.308874  | -2.181151 | F | -1.926385 | 1.632098  | 1.623820  |
| F | 0.135127  | 1.875161  | -2.108205 | F | -3.701809 | 2.220847  | 4.108663  |
| F | 1.689749  | 1.911846  | -1.264050 | F | -4.215410 | 1.206542  | 2.763634  |
| F | 0.982859  | 3.188192  | -4.751517 | F | -4.257129 | 0.579096  | 4.427191  |
| F | 1.528983  | 1.722351  | -5.583801 | F | -0.963550 | 4.220624  | -0.929503 |
| F | 0.038078  | 1.707014  | -4.629768 | F | -1.688655 | 3.748572  | 0.612885  |
| F | 2.929987  | 3.603172  | -3.381622 | F | -1.058861 | 2.520567  | -0.469093 |
| F | 3.872565  | 2.279023  | -2.700245 | F | -2.525664 | 4.319090  | -3.031871 |
| F | 3.689533  | 2.451221  | -4.463562 | F | -1.990334 | 2.656746  | -2.939736 |
| F | 0.393004  | -4.819779 | -1.358356 | F | -3.716246 | 3.019087  | -3.132705 |
| F | 1.996727  | -4.058860 | -1.365038 | F | -2.985450 | 5.559125  | -1.328104 |
| F | 0.554970  | -3.128551 | -0.890190 | F | -4.610217 | 4.865917  | -1.298089 |
| F | -1.262476 | -4.283824 | -3.262216 | F | -3.670554 | 5.048190  | 0.200340  |



|                 |           |           |           |    |           |           |           |
|-----------------|-----------|-----------|-----------|----|-----------|-----------|-----------|
| F               | -3.102357 | -2.062863 | -1.973111 | C  | 4.698317  | -1.618312 | -0.401733 |
| F               | -3.215514 | -2.504821 | -0.274613 | C  | 3.317226  | -1.511173 | -0.200259 |
| F               | -4.148685 | -3.378668 | -1.502406 | Si | 3.049313  | 2.684903  | 0.498613  |
| F               | -6.137727 | -3.228637 | -0.678794 | C  | 1.887467  | 3.255185  | -0.860871 |
| F               | -5.716600 | -2.377551 | 0.807964  | Si | 2.327054  | -3.125368 | -0.378819 |
| F               | -7.017142 | -1.776132 | -0.244162 | C  | 3.526163  | -4.572604 | -0.260063 |
| F               | -5.894991 | -2.123907 | -2.889004 | C  | 1.079463  | -3.356266 | 1.005737  |
| F               | -6.471249 | -0.534130 | -2.350104 | C  | 1.533218  | -3.192471 | -2.078968 |
| F               | -4.874762 | -0.697884 | -3.094807 | C  | 2.322566  | 2.898794  | 2.219877  |
|                 |           |           |           | C  | 4.549481  | 3.820559  | 0.428997  |
| <b>8M</b>       |           |           |           | C  | -1.533074 | 3.190904  | -2.079166 |
| 78              |           |           |           | C  | -3.526817 | 4.572724  | -0.262556 |
| E= -2668.115761 |           |           |           | C  | -1.888084 | -3.256148 | -0.861268 |
| C               | -3.623538 | -0.902977 | 0.171317  | C  | -2.321270 | -2.897368 | 2.220034  |
| C               | -2.789478 | 0.234319  | 0.090601  | H  | 1.288168  | -0.110233 | 2.512265  |
| C               | -3.317425 | 1.511261  | -0.199846 | H  | -1.287848 | 0.113957  | 2.512131  |
| C               | -4.698574 | 1.618205  | -0.401001 | H  | 5.135637  | -2.586179 | -0.620002 |
| C               | -5.535142 | 0.518566  | -0.321461 | H  | 6.602253  | -0.630019 | -0.479701 |
| C               | -4.996111 | -0.724528 | -0.037863 | H  | 5.664222  | 1.576050  | 0.019811  |
| C               | -1.328983 | 0.091120  | 0.363080  | H  | -5.663770 | -1.576534 | 0.019424  |
| C               | -0.721138 | 0.053207  | 1.591490  | H  | -6.602322 | 0.629551  | -0.479182 |
| C               | 0.721385  | -0.051015 | 1.591571  | H  | -5.136141 | 2.586049  | -0.618865 |
| C               | 1.329124  | -0.090830 | 0.363198  | H  | 0.888242  | -4.071664 | -2.171755 |
| P               | 0.000054  | -0.000319 | -0.767602 | H  | 0.941165  | -2.309582 | -2.329328 |
| Si              | -2.327510 | 3.125504  | -0.379173 | H  | 2.320684  | -3.272606 | -2.835031 |
| C               | -1.080792 | 3.358443  | 1.005870  | H  | 0.673683  | -4.372236 | 0.970258  |
| Si              | -3.048672 | -2.684761 | 0.498882  | H  | 1.556863  | -3.218102 | 1.980531  |
| C               | -4.548833 | -3.820569 | 0.431004  | H  | 0.241995  | -2.664729 | 0.943930  |
| C               | 2.789555  | -0.234218 | 0.090608  | H  | 2.955710  | -5.506772 | -0.271155 |
| C               | 3.623838  | 0.902910  | 0.171580  | H  | 4.224471  | -4.611341 | -1.100582 |
| C               | 4.996359  | 0.724215  | -0.037679 | H  | 4.106906  | -4.550129 | 0.666646  |
| C               | 5.535110  | -0.518893 | -0.321830 | H  | 1.536570  | 4.272963  | -0.664240 |

|                 |           |           |           |    |           |           |           |
|-----------------|-----------|-----------|-----------|----|-----------|-----------|-----------|
| H               | 2.416320  | 3.258012  | -1.818433 | C  | -1.339369 | 0.097175  | 0.337604  |
| H               | 1.007346  | 2.624524  | -0.980701 | C  | 1.325906  | -0.063995 | 0.349406  |
| H               | 2.112971  | 3.957929  | 2.400679  | O  | -0.048566 | -0.955444 | -2.022040 |
| H               | 1.396387  | 2.347131  | 2.378432  | C  | 2.774404  | -0.207404 | 0.032947  |
| H               | 3.047632  | 2.569787  | 2.970907  | C  | 3.610774  | 0.934986  | 0.030600  |
| H               | 4.217406  | 4.850760  | 0.592759  | C  | 4.946987  | 0.762582  | -0.350810 |
| H               | 5.286265  | 3.588728  | 1.203520  | C  | 5.450125  | -0.473694 | -0.718129 |
| H               | 5.050884  | 3.789406  | -0.542417 | C  | 4.622478  | -1.579985 | -0.671041 |
| H               | -1.533938 | -4.272324 | -0.662236 | C  | 3.277353  | -1.486783 | -0.292411 |
| H               | -2.419537 | -3.263673 | -1.817380 | Si | 3.136864  | 2.714289  | 0.513666  |
| H               | -1.010058 | -2.623489 | -0.985896 | C  | 2.382949  | 2.831976  | 2.234027  |
| H               | -2.109786 | -3.956129 | 2.400846  | Si | 2.378571  | -3.170615 | -0.243946 |
| H               | -1.396109 | -2.344040 | 2.378605  | C  | 3.642821  | -4.443931 | 0.338688  |
| H               | -3.046974 | -2.569671 | 2.971023  | C  | 0.730792  | 0.007997  | 1.546218  |
| H               | -4.216524 | -4.850678 | 0.594898  | C  | -0.745792 | 0.103865  | 1.538073  |
| H               | -5.284922 | -3.588457 | 1.206108  | C  | -2.793433 | 0.243263  | 0.039989  |
| H               | -5.051134 | -3.789913 | -0.539958 | C  | -3.628386 | -0.897055 | 0.081414  |
| H               | -0.887974 | 4.069908  | -2.172795 | C  | -4.981629 | -0.725989 | -0.232358 |
| H               | -0.941082 | 2.307758  | -2.328691 | C  | -5.503393 | 0.507673  | -0.581365 |
| H               | -2.320410 | 3.270326  | -2.835445 | C  | -4.672372 | 1.612910  | -0.594676 |
| H               | -2.956408 | 5.506912  | -0.274206 | C  | -3.309941 | 1.519436  | -0.282608 |
| H               | -4.224671 | 4.610622  | -1.103490 | Si | -3.096289 | -2.674691 | 0.518167  |
| H               | -4.108044 | 4.551106  | 0.663871  | C  | -4.643478 | -3.747863 | 0.596910  |
| H               | -0.673327 | 4.373639  | 0.967711  | Si | -2.391731 | 3.185594  | -0.323010 |
| H               | -1.559523 | 3.224090  | 1.980551  | C  | -1.720923 | 3.524529  | -2.047661 |
| H               | -0.244397 | 2.665343  | 0.947114  | C  | 0.974792  | -3.229277 | 0.998235  |
| O               | -0.000045 | -0.002925 | -2.251492 | C  | 1.785934  | -3.639675 | -1.954083 |
|                 |           |           |           | C  | 4.710558  | 3.747148  | 0.588000  |
| <b>8MH</b>      |           |           |           | C  | 2.059458  | 3.530445  | -0.794357 |
| 79              |           |           |           | C  | -2.004334 | -3.392208 | -0.825335 |
| E: -2668.740040 |           |           |           | C  | -2.344383 | -2.776092 | 2.242130  |
| P               | -0.000379 | 0.029224  | -0.906296 | C  | -3.631894 | 4.548505  | 0.064867  |

|   |           |           |           |                   |           |           |           |
|---|-----------|-----------|-----------|-------------------|-----------|-----------|-----------|
| C | -1.043401 | 3.329720  | 0.975455  | H                 | 3.001955  | 2.285884  | 2.952633  |
| H | -1.299754 | 0.196610  | 2.466188  | H                 | 4.447461  | 4.756313  | 0.920738  |
| H | 1.279681  | -0.013402 | 2.481456  | H                 | 5.438594  | 3.346262  | 1.298932  |
| H | -5.101857 | 2.576784  | -0.845216 | H                 | 5.199258  | 3.844235  | -0.385382 |
| H | -6.554158 | 0.608566  | -0.829426 | H                 | 1.301260  | -4.621227 | -1.935955 |
| H | -5.649750 | -1.578795 | -0.205849 | H                 | 1.072993  | -2.901469 | -2.327767 |
| H | 5.617631  | 1.613439  | -0.362736 | H                 | 2.627623  | -3.691639 | -2.651697 |
| H | 6.486024  | -0.574909 | -1.022299 | H                 | 3.132211  | -5.394420 | 0.523965  |
| H | 5.039315  | -2.547408 | -0.930541 | H                 | 4.424210  | -4.638588 | -0.400694 |
| H | -1.158934 | 4.463809  | -2.061092 | H                 | 4.127445  | -4.137752 | 1.270347  |
| H | -1.068418 | 2.738449  | -2.432701 | H                 | 0.640586  | -4.266061 | 1.107432  |
| H | -2.553594 | 3.622993  | -2.750831 | H                 | 1.291523  | -2.871324 | 1.982070  |
| H | -0.668036 | 4.357762  | 0.994369  | H                 | 0.114155  | -2.644753 | 0.681483  |
| H | -1.438689 | 3.096475  | 1.968612  | H                 | 0.084621  | 1.373392  | -1.331695 |
| H | -0.193789 | 2.675568  | 0.794491  |                   |           |           |           |
| H | -3.095712 | 5.495224  | 0.184540  | {8M} <sub>2</sub> |           |           |           |
| H | -4.368004 | 4.693251  | -0.730153 | 156               |           |           |           |
| H | -4.171639 | 4.350553  | 0.995216  | E= -5336.332421   |           |           |           |
| H | -1.543766 | -4.327172 | -0.491264 | C                 | -4.665638 | 0.840721  | -0.275907 |
| H | -2.628723 | -3.620069 | -1.695248 | C                 | -4.028621 | -0.232865 | -0.947453 |
| H | -1.216899 | -2.720640 | -1.172437 | C                 | -4.387943 | -0.569106 | -2.277900 |
| H | -2.244024 | -3.828198 | 2.527988  | C                 | -5.253219 | 0.303079  | -2.953502 |
| H | -1.359539 | -2.319081 | 2.326310  | C                 | -5.756766 | 1.447863  | -2.364017 |
| H | -3.010288 | -2.297731 | 2.967395  | C                 | -5.488611 | 1.685826  | -1.028744 |
| H | -4.344660 | -4.764653 | 0.871697  | C                 | -3.055272 | -1.092354 | -0.214277 |
| H | -5.358115 | -3.401428 | 1.349233  | C                 | -3.420587 | -2.299750 | 0.298703  |
| H | -5.159320 | -3.812160 | -0.365247 | C                 | -2.459174 | -2.986129 | 1.100967  |
| H | 1.886800  | 4.578072  | -0.527314 | C                 | -1.303152 | -2.311167 | 1.334050  |
| H | 2.576321  | 3.511701  | -1.758511 | C                 | -0.152574 | -2.956172 | 2.028179  |
| H | 1.084139  | 3.066563  | -0.933465 | C                 | 0.627196  | -3.854674 | 1.264555  |
| H | 2.363713  | 3.881638  | 2.544481  | C                 | 1.705276  | -4.484010 | 1.894182  |
| H | 1.364934  | 2.450906  | 2.302056  | C                 | 1.970902  | -4.292087 | 3.240103  |

|    |           |           |           |    |           |           |           |
|----|-----------|-----------|-----------|----|-----------|-----------|-----------|
| C  | 1.133657  | -3.482141 | 3.988368  | Si | 3.884452  | -0.320183 | -4.006847 |
| C  | 0.064002  | -2.787194 | 3.410409  | C  | 3.624699  | 1.523716  | -4.252490 |
| Si | 0.189998  | -4.476382 | -0.481453 | Si | 5.018375  | 0.064654  | 1.784037  |
| C  | -1.221779 | -5.724688 | -0.379174 | C  | 6.531624  | -0.725078 | 2.588043  |
| Si | -1.026459 | -1.775080 | 4.593058  | C  | 1.561205  | 6.287961  | 2.416733  |
| C  | -2.852514 | -2.173277 | 4.380365  | C  | -0.015411 | 4.324777  | 4.149950  |
| Si | -4.015268 | -2.136869 | -3.319494 | C  | -1.742345 | 3.490618  | -4.151191 |
| C  | -2.523020 | -1.908947 | -4.428896 | C  | 1.098194  | 4.256924  | -3.738998 |
| Si | -4.948012 | 0.988176  | 1.607966  | C  | 5.548948  | 1.803847  | 1.303028  |
| C  | -3.498006 | 1.215010  | 2.767440  | C  | 3.715243  | 0.112769  | 3.124877  |
| P  | -1.535305 | -0.652770 | 0.694777  | C  | 5.409337  | -0.713900 | -5.050481 |
| P  | 1.553127  | 0.918027  | 0.200630  | C  | 2.432087  | -1.239671 | -4.752918 |
| C  | 1.296526  | 2.631250  | -0.292759 | C  | -0.205930 | -3.120901 | -1.709896 |
| C  | 0.112315  | 3.522009  | -0.121049 | C  | 1.639178  | -5.473719 | -1.145912 |
| C  | -0.146109 | 4.212382  | 1.077991  | C  | -0.579251 | -2.257802 | 6.358664  |
| C  | -1.309423 | 4.994797  | 1.140804  | C  | -0.710850 | 0.070388  | 4.455670  |
| C  | -2.170554 | 5.118898  | 0.067665  | C  | -3.809824 | -3.767325 | -2.409337 |
| C  | -1.845206 | 4.505740  | -1.132400 | C  | -5.509869 | -2.402706 | -4.443915 |
| C  | -0.702967 | 3.714196  | -1.264100 | C  | -6.092521 | 2.455046  | 1.914899  |
| Si | 0.992904  | 4.499305  | 2.572649  | C  | -5.885731 | -0.561643 | 2.124965  |
| C  | 2.519116  | 3.428215  | 2.676789  | H  | 4.371566  | 2.212975  | -1.578246 |
| Si | -0.266703 | 3.162272  | -3.033701 | H  | 2.603577  | 4.062015  | -1.196886 |
| C  | 0.167541  | 1.348033  | -3.169161 | H  | -2.644262 | -3.966435 | 1.521428  |
| C  | 2.431049  | 3.029162  | -0.920616 | H  | -4.421474 | -2.685673 | 0.147667  |
| C  | 3.385287  | 1.992818  | -1.187712 | H  | 2.341426  | -5.153742 | 1.325745  |
| C  | 3.032626  | 0.723110  | -0.856809 | H  | 2.806542  | -4.798270 | 3.711729  |
| C  | 3.978388  | -0.425709 | -0.964342 | H  | 1.322259  | -3.386596 | 5.052024  |
| C  | 4.266727  | -0.965651 | -2.242779 | H  | -5.542927 | 0.088386  | -3.975459 |
| C  | 5.064607  | -2.117391 | -2.295863 | H  | -6.390374 | 2.122873  | -2.929162 |
| C  | 5.580027  | -2.712200 | -1.160036 | H  | -5.957217 | 2.539219  | -0.554243 |
| C  | 5.396578  | -2.088529 | 0.060517  | H  | -1.543917 | 5.532732  | 2.054917  |
| C  | 4.639678  | -0.919064 | 0.190412  | H  | -3.069455 | 5.720637  | 0.150359  |

|   |           |           |           |   |           |           |           |
|---|-----------|-----------|-----------|---|-----------|-----------|-----------|
| H | -2.500319 | 4.649442  | -1.983983 | H | 0.282490  | 0.315269  | 4.839781  |
| H | 5.888690  | -2.506947 | 0.930176  | H | -0.780086 | 0.443419  | 3.432421  |
| H | 6.163494  | -3.623611 | -1.232789 | H | -3.429231 | -1.656192 | 5.154179  |
| H | 5.293930  | -2.567860 | -3.255078 | H | -3.251984 | -1.878799 | 3.410562  |
| H | 3.896527  | 0.970988  | 3.778986  | H | -3.021168 | -3.248070 | 4.498261  |
| H | 2.704691  | 0.184834  | 2.728805  | H | -1.251452 | -1.737392 | 7.048373  |
| H | 3.770453  | -0.795295 | 3.727017  | H | -0.686905 | -3.331408 | 6.537450  |
| H | 5.986841  | 2.299744  | 2.175281  | H | 0.442119  | -1.967237 | 6.621452  |
| H | 6.307617  | 1.772322  | 0.515261  | H | 2.199319  | 6.568067  | 3.260929  |
| H | 4.719121  | 2.416311  | 0.953774  | H | 2.136494  | 6.433121  | 1.497461  |
| H | 6.831932  | -0.098133 | 3.434276  | H | 0.714269  | 6.979285  | 2.390072  |
| H | 6.321947  | -1.722741 | 2.985213  | H | 3.046881  | 3.651085  | 3.610113  |
| H | 7.384051  | -0.796126 | 1.907162  | H | 2.291041  | 2.364296  | 2.664483  |
| H | 3.493913  | 1.686959  | -5.328124 | H | 3.198104  | 3.638056  | 1.848635  |
| H | 2.746296  | 1.918236  | -3.748510 | H | 0.622406  | 4.509768  | 5.020003  |
| H | 4.496861  | 2.104684  | -3.940708 | H | -0.842328 | 5.038973  | 4.191074  |
| H | 5.324586  | -0.187306 | -6.006506 | H | -0.432356 | 3.321105  | 4.245114  |
| H | 6.328925  | -0.374873 | -4.564790 | H | 1.145845  | 4.110081  | -4.823190 |
| H | 5.521420  | -1.776928 | -5.278030 | H | 0.863012  | 5.310285  | -3.557396 |
| H | 2.342674  | -0.996964 | -5.816577 | H | 2.091007  | 4.057007  | -3.337360 |
| H | 2.554755  | -2.322170 | -4.657834 | H | 0.320803  | 1.091532  | -4.221376 |
| H | 1.498173  | -0.963816 | -4.265634 | H | 1.068328  | 1.068592  | -2.622356 |
| H | -0.373378 | -3.569699 | -2.693942 | H | -0.658876 | 0.741218  | -2.795762 |
| H | -1.096537 | -2.548263 | -1.447660 | H | -1.516002 | 3.106414  | -5.151274 |
| H | 0.633446  | -2.428922 | -1.798953 | H | -2.648063 | 2.995656  | -3.800751 |
| H | -1.248613 | -6.306257 | -1.306825 | H | -1.946294 | 4.560698  | -4.253551 |
| H | -1.047046 | -6.423634 | 0.444698  | H | -2.464539 | -2.742727 | -5.136050 |
| H | -2.206785 | -5.278823 | -0.243319 | H | -2.576457 | -0.978020 | -4.999393 |
| H | 1.432609  | -5.741743 | -2.187263 | H | -1.601981 | -1.898509 | -3.848206 |
| H | 2.573542  | -4.913194 | -1.125225 | H | -3.717649 | -4.550001 | -3.170519 |
| H | 1.777432  | -6.406420 | -0.590829 | H | -2.917501 | -3.803469 | -1.787986 |
| H | -1.448504 | 0.607689  | 5.059179  | H | -4.676657 | -4.014326 | -1.791034 |

|                 |           |           |           |   |           |           |           |
|-----------------|-----------|-----------|-----------|---|-----------|-----------|-----------|
| H               | -5.423558 | -3.392245 | -4.904043 | C | 0.895199  | -0.250641 | 1.486413  |
| H               | -6.452423 | -2.374140 | -3.889917 | C | 0.937183  | -0.968175 | 0.327176  |
| H               | -5.572510 | -1.675234 | -5.257508 | P | -0.330798 | -0.279174 | -0.682965 |
| H               | -3.027707 | 0.266898  | 3.015568  | O | -0.500613 | -0.355705 | -2.158425 |
| H               | -2.735552 | 1.873122  | 2.353363  | C | -3.680318 | 0.609539  | 0.836735  |
| H               | -3.868704 | 1.662598  | 3.696201  | C | -3.363032 | 0.163082  | 2.120354  |
| H               | -6.291042 | 2.508756  | 2.990122  | C | -3.964944 | -0.973410 | 2.642463  |
| H               | -5.632372 | 3.402390  | 1.619939  | C | -4.890590 | -1.684120 | 1.886928  |
| H               | -7.057031 | 2.363133  | 1.409052  | C | -5.195837 | -1.261876 | 0.599745  |
| H               | -6.243076 | -0.455192 | 3.154318  | C | -4.594818 | -0.122947 | 0.078989  |
| H               | -6.752710 | -0.732075 | 1.480198  | C | 1.824629  | -2.087044 | -0.038460 |
| H               | -5.253357 | -1.451278 | 2.086707  | C | 1.290217  | -3.273793 | -0.574186 |
| O               | 0.153780  | -0.024134 | -0.225702 | C | 2.144945  | -4.301149 | -0.967382 |
| O               | 1.802065  | 0.840969  | 1.921005  | C | 3.516576  | -4.178345 | -0.816304 |
|                 |           |           |           | C | 4.045022  | -3.019591 | -0.269584 |
| <b>8N</b>       |           |           |           | C | 3.219757  | -1.963924 | 0.115086  |
| 70              |           |           |           | C | -0.178689 | -3.468837 | -0.709836 |
| E= -1957.502965 |           |           |           | C | -1.011045 | -3.404830 | 0.410570  |
| C               | 0.827759  | 4.559492  | -0.096285 | C | -2.381519 | -3.571195 | 0.280727  |
| C               | 0.112383  | 3.570449  | -0.769189 | C | -2.940220 | -3.800055 | -0.971154 |
| C               | 0.738715  | 2.864034  | -1.798008 | C | -2.120051 | -3.875947 | -2.089071 |
| C               | 2.052764  | 3.147310  | -2.145932 | C | -0.746625 | -3.714639 | -1.958691 |
| C               | 2.756898  | 4.141258  | -1.474845 | C | 3.855734  | -0.741853 | 0.683306  |
| C               | 2.142688  | 4.843610  | -0.445642 | C | 4.667155  | -0.852280 | 1.812458  |
| C               | -1.321003 | 3.323473  | -0.441720 | C | 5.263508  | 0.271995  | 2.372104  |
| C               | -1.763613 | 2.097464  | 0.082771  | C | 5.055529  | 1.522307  | 1.806160  |
| C               | -3.134743 | 1.888911  | 0.301385  | C | 4.256206  | 1.641148  | 0.674022  |
| C               | -4.037035 | 2.913076  | 0.012468  | C | 3.663582  | 0.519114  | 0.115342  |
| C               | -3.596187 | 4.133467  | -0.472996 | H | -0.133557 | 1.497696  | 2.377724  |
| C               | -2.243594 | 4.336078  | -0.697357 | H | 1.526948  | -0.478049 | 2.335749  |
| C               | -0.774462 | 1.037928  | 0.376513  | H | 5.117878  | -2.910868 | -0.156022 |
| C               | -0.035419 | 0.856900  | 1.509799  | H | 4.173226  | -4.984932 | -1.121371 |

|                 |           |           |           |   |           |           |           |
|-----------------|-----------|-----------|-----------|---|-----------|-----------|-----------|
| H               | 1.717286  | -5.210581 | -1.374332 | C | -1.390572 | 2.363425  | 0.127267  |
| H               | -1.889799 | 5.278865  | -1.099356 | C | -0.762173 | 3.536064  | -0.326010 |
| H               | -4.307408 | 4.923882  | -0.683613 | C | -1.528165 | 4.683239  | -0.536488 |
| H               | -5.093295 | 2.745891  | 0.191287  | C | -2.898667 | 4.672957  | -0.337370 |
| H               | 0.189091  | 2.103451  | -2.342477 | C | -3.522675 | 3.505911  | 0.072861  |
| H               | 2.523201  | 2.597186  | -2.953224 | C | -2.783933 | 2.348104  | 0.311261  |
| H               | 3.779636  | 4.367655  | -1.755579 | C | 0.691468  | 3.601784  | -0.648372 |
| H               | 2.685917  | 5.617316  | 0.085436  | C | 1.500129  | 4.560883  | -0.038130 |
| H               | 0.347379  | 5.109602  | 0.705940  | C | 2.831380  | 4.706123  | -0.409453 |
| H               | -2.658672 | 0.726273  | 2.720788  | C | 3.368066  | 3.896183  | -1.402470 |
| H               | -3.719246 | -1.298124 | 3.647372  | C | 2.572130  | 2.927480  | -2.004414 |
| H               | -5.367969 | -2.566311 | 2.299147  | C | 1.243357  | 2.776234  | -1.630787 |
| H               | -5.906618 | -1.817262 | -0.001746 | C | -3.516585 | 1.129901  | 0.758304  |
| H               | -4.833973 | 0.206845  | -0.926066 | C | -3.266616 | 0.539345  | 1.997914  |
| H               | 4.816265  | -1.827110 | 2.265027  | C | -4.008190 | -0.555106 | 2.421105  |
| H               | 5.885290  | 0.168741  | 3.254459  | C | -5.010511 | -1.075808 | 1.611373  |
| H               | 5.513122  | 2.402196  | 2.244237  | C | -5.259239 | -0.503482 | 0.371073  |
| H               | 4.079766  | 2.611772  | 0.226804  | C | -4.517154 | 0.591519  | -0.052091 |
| H               | 3.032979  | 0.626467  | -0.760414 | C | 0.174102  | 0.892804  | 1.458238  |
| H               | -0.110211 | -3.738116 | -2.835888 | C | 0.883602  | -0.399645 | 1.446037  |
| H               | -2.550023 | -4.043424 | -3.069845 | C | 1.442146  | -2.380584 | -0.024586 |
| H               | -4.013730 | -3.911962 | -1.073000 | C | 0.771413  | -3.495241 | -0.558200 |
| H               | -3.015503 | -3.505653 | 1.155724  | C | 1.487023  | -4.607786 | -0.989262 |
| H               | -0.577341 | -3.214099 | 1.385859  | C | 2.868164  | -4.639304 | -0.884781 |
|                 |           |           |           | C | 3.537553  | -3.550825 | -0.348735 |
| <b>8NH</b>      |           |           |           | C | 2.849175  | -2.415455 | 0.076600  |
| 71              |           |           |           | C | -0.713155 | -3.510547 | -0.645576 |
| E: -1958.137896 |           |           |           | C | -1.483495 | -3.569469 | 0.516639  |
| P               | -0.532605 | -0.317078 | -0.698583 | C | -2.867465 | -3.530729 | 0.443372  |
| C               | 0.687664  | -1.171430 | 0.366447  | C | -3.496971 | -3.428635 | -0.792529 |
| C               | -0.589600 | 1.147569  | 0.390984  | C | -2.737344 | -3.383870 | -1.954069 |
| O               | -0.212677 | -0.127298 | -2.143582 | C | -1.349895 | -3.431175 | -1.882445 |

|   |           |           |           |                   |              |           |           |
|---|-----------|-----------|-----------|-------------------|--------------|-----------|-----------|
| C | 3.648861  | -1.283246 | 0.624269  | H                 | -3.456899    | -3.563539 | 1.351608  |
| C | 4.447872  | -1.490230 | 1.748366  | H                 | -0.987605    | -3.627371 | 1.479307  |
| C | 5.187038  | -0.447561 | 2.295972  | H                 | -1.776030    | -0.932123 | -0.430564 |
| C | 5.134624  | 0.815248  | 1.722265  |                   |              |           |           |
| C | 4.351038  | 1.027361  | 0.592424  | {8N} <sub>2</sub> |              |           |           |
| C | 3.617778  | -0.013811 | 0.043480  | 140               |              |           |           |
| H | 0.294228  | 1.586239  | 2.283973  | E=                | -3915.124315 |           |           |
| H | 1.570530  | -0.655404 | 2.244475  | C                 | 3.716942     | -3.317017 | -0.812349 |
| H | 4.619309  | -3.559903 | -0.275328 | C                 | 2.641284     | -3.489054 | 0.078909  |
| H | 3.422402  | -5.507713 | -1.221635 | C                 | 2.800651     | -3.114805 | 1.421191  |
| H | 0.945223  | -5.454620 | -1.395235 | C                 | 3.998131     | -2.532674 | 1.862689  |
| H | -1.035276 | 5.581881  | -0.890063 | C                 | 5.056867     | -2.341214 | 0.964468  |
| H | -3.481521 | 5.569711  | -0.513253 | C                 | 4.916859     | -2.748792 | -0.372086 |
| H | -4.595210 | 3.484919  | 0.230729  | C                 | 1.347000     | -4.051057 | -0.414798 |
| H | 0.633354  | 2.021740  | -2.117673 | C                 | 0.551399     | -3.342968 | -1.353153 |
| H | 2.982657  | 2.288300  | -2.778209 | C                 | -0.602844    | -3.973025 | -1.899228 |
| H | 4.402676  | 4.016721  | -1.704760 | C                 | -0.931491    | -5.276907 | -1.481885 |
| H | 3.446406  | 5.457784  | 0.072809  | C                 | -0.159443    | -5.956789 | -0.536651 |
| H | 1.079517  | 5.199983  | 0.731365  | C                 | 0.975822     | -5.339769 | -0.004222 |
| H | -2.497699 | 0.953411  | 2.639003  | C                 | 0.954791     | -1.999059 | -1.828908 |
| H | -3.808944 | -0.996148 | 3.391361  | P                 | 1.676204     | -0.589762 | -0.808948 |
| H | -5.593873 | -1.926719 | 1.945448  | O                 | 0.513634     | -0.107286 | 0.406399  |
| H | -6.033232 | -0.908704 | -0.270930 | P                 | -1.100286    | 0.304048  | 0.727081  |
| H | -4.707502 | 1.035389  | -1.023186 | C                 | -1.159768    | 1.962045  | 1.663620  |
| H | 4.473278  | -2.473100 | 2.207428  | C                 | -1.162400    | 3.373425  | 1.177700  |
| H | 5.797344  | -0.623515 | 3.174851  | C                 | 0.022526     | 4.159930  | 1.168428  |
| H | 5.701980  | 1.633401  | 2.151521  | C                 | -0.045392    | 5.516522  | 0.797833  |
| H | 4.297189  | 2.010259  | 0.140780  | C                 | -1.262632    | 6.120845  | 0.480428  |
| H | 2.998468  | 0.164094  | -0.829380 | C                 | -2.437983    | 5.369915  | 0.561730  |
| H | -0.752762 | -3.357081 | -2.783854 | C                 | -2.406617    | 4.006669  | 0.908180  |
| H | -3.222357 | -3.295627 | -2.919292 | C                 | -1.490649    | -3.333473 | -2.923156 |
| H | -4.578224 | -3.376864 | -0.846747 | C                 | -1.806746    | -4.040587 | -4.099925 |



|   |           |           |           |   |           |           |           |
|---|-----------|-----------|-----------|---|-----------|-----------|-----------|
| C | -2.651585 | -3.478560 | -5.069327 | C | -1.392680 | 3.451467  | -2.279322 |
| C | -3.194849 | -2.199702 | -4.870013 | C | -2.716911 | 3.362301  | -2.721207 |
| C | -2.888699 | -1.494392 | -3.695150 | C | -3.028142 | 2.603644  | -3.857708 |
| C | -2.045821 | -2.055205 | -2.729242 | C | -1.997059 | 1.956397  | -4.553972 |
| C | 1.350375  | 3.650743  | 1.617751  | C | -0.672579 | 2.056910  | -4.110451 |
| C | 2.098208  | 4.378555  | 2.565003  | O | -2.002313 | 0.140218  | -0.565397 |
| C | 3.360198  | 3.927164  | 2.975556  | C | -1.403444 | -0.669739 | 2.308842  |
| C | 3.884896  | 2.731916  | 2.456977  | C | -1.269016 | -2.134864 | 2.468432  |
| C | 3.139383  | 1.997332  | 1.524229  | C | -2.156637 | -3.028460 | 1.818380  |
| C | 1.893705  | 2.470055  | 1.101517  | C | -1.965519 | -4.414364 | 1.953634  |
| C | -3.732673 | 3.323631  | 1.015312  | C | -0.946695 | -4.923606 | 2.759780  |
| C | -4.092555 | 2.256906  | 0.175004  | C | -0.115090 | -4.045066 | 3.456491  |
| C | -5.389145 | 1.729590  | 0.224833  | C | -0.253714 | -2.651539 | 3.319640  |
| C | -6.334537 | 2.241104  | 1.125306  | C | -3.387890 | -2.577718 | 1.105044  |
| C | -5.974744 | 3.291299  | 1.984325  | C | -3.718968 | -3.113979 | -0.149975 |
| C | -4.683756 | 3.833340  | 1.921701  | C | -4.931221 | -2.791870 | -0.770397 |
| C | 1.051574  | -1.653884 | -3.139226 | C | -5.849469 | -1.953954 | -0.122194 |
| C | 1.412613  | -0.260907 | -3.410979 | C | -5.534450 | -1.425360 | 1.138997  |
| C | 1.589226  | 0.537167  | -2.329169 | C | -4.307672 | -1.723114 | 1.742179  |
| C | 2.013648  | 1.963484  | -2.315467 | C | 0.663174  | -1.789133 | 4.130155  |
| C | 3.361689  | 2.306519  | -2.008623 | C | 0.758853  | -2.027894 | 5.515340  |
| C | 3.700319  | 3.650855  | -1.775857 | C | 1.600998  | -1.251536 | 6.324145  |
| C | 2.741214  | 4.661331  | -1.867561 | C | 2.360407  | -0.219905 | 5.753705  |
| C | 1.442131  | 4.336764  | -2.257226 | C | 2.275751  | 0.019442  | 4.373314  |
| C | 1.059093  | 3.002296  | -2.498751 | C | 1.439653  | -0.759599 | 3.564241  |
| C | 4.489156  | 1.320877  | -1.983798 | C | -1.547390 | 0.222622  | 3.308068  |
| C | 4.703473  | 0.432323  | -3.056287 | C | -1.446961 | 1.654069  | 2.946600  |
| C | 5.844304  | -0.378662 | -3.102729 | H | -1.685037 | -0.077116 | 4.340544  |
| C | 6.798089  | -0.317728 | -2.075688 | H | -1.615298 | 2.423450  | 3.692077  |
| C | 6.593757  | 0.557131  | -0.999278 | H | 1.564741  | 0.079114  | -4.429346 |
| C | 5.453998  | 1.369642  | -0.958376 | H | 0.858314  | -2.351168 | -3.946326 |
| C | -0.350802 | 2.789737  | -2.953100 | H | -1.816901 | -5.749351 | -1.896856 |

|   |           |           |           |           |              |           |           |
|---|-----------|-----------|-----------|-----------|--------------|-----------|-----------|
| H | -0.439135 | -6.956275 | -0.220592 | H         | -5.148771    | -3.188918 | -1.756464 |
| H | 1.599779  | -5.859488 | 0.715429  | H         | -6.798243    | -1.715253 | -0.592966 |
| H | 0.707366  | 5.122945  | -2.394328 | H         | -6.238431    | -0.779342 | 1.652354  |
| H | 3.014093  | 5.693769  | -1.677672 | H         | -4.078231    | -1.317900 | 2.721556  |
| H | 4.730103  | 3.902957  | -1.546423 | H         | 0.154864     | -2.811953 | 5.962913  |
| H | 0.874863  | 6.089798  | 0.756804  | H         | 1.655485     | -1.446107 | 7.390478  |
| H | -1.297275 | 7.164266  | 0.186816  | H         | 3.006815     | 0.391883  | 6.374807  |
| H | -3.396305 | 5.829422  | 0.343817  | H         | 2.851214     | 0.819633  | 3.922902  |
| H | 0.670773  | -4.433471 | 4.096624  | H         | 1.389228     | -0.562593 | 2.496660  |
| H | -0.810856 | -5.995361 | 2.855446  | H         | -1.375451    | -5.024034 | -4.266379 |
| H | -2.648494 | -5.088727 | 1.448796  | H         | -2.878769    | -4.034004 | -5.973982 |
| H | 1.685769  | 5.288890  | 2.990332  | H         | -3.847979    | -1.761577 | -5.618673 |
| H | 3.925533  | 4.498415  | 3.704930  | H         | -3.299501    | -0.507090 | -3.513706 |
| H | 4.856811  | 2.374877  | 2.784211  | H         | -1.841818    | -1.481369 | -1.831151 |
| H | 3.515948  | 1.059356  | 1.127027  | H         | 1.974944     | -3.244834 | 2.109542  |
| H | 1.341400  | 1.927443  | 0.352361  | H         | 4.088967     | -2.218776 | 2.897723  |
| H | -3.377632 | 1.833633  | -0.521124 | H         | 5.981000     | -1.878428 | 1.295887  |
| H | -5.646799 | 0.913739  | -0.440078 | H         | 5.733117     | -2.605892 | -1.070277 |
| H | -7.338505 | 1.828824  | 1.158393  | H         | 3.600767     | -3.609437 | -1.851473 |
| H | -6.695269 | 3.690552  | 2.691125  |           |              |           |           |
| H | -4.408089 | 4.653933  | 2.578348  | <b>8P</b> |              |           |           |
| H | -1.161383 | 4.043962  | -1.403547 | 94        |              |           |           |
| H | -3.499693 | 3.878182  | -2.174679 | E=        | -4653.891627 |           |           |
| H | -4.055000 | 2.525957  | -4.200367 | C         | 2.616198     | -2.594447 | 1.997278  |
| H | -2.218959 | 1.379774  | -5.446269 | C         | 2.875940     | -2.304779 | 0.648469  |
| H | 0.113806  | 1.594497  | -4.691854 | C         | 2.521739     | -3.262592 | -0.309556 |
| H | 3.996116  | 0.404772  | -3.876403 | C         | 1.895382     | -4.444713 | 0.068261  |
| H | 5.995306  | -1.044076 | -3.946745 | C         | 1.613326     | -4.695069 | 1.397698  |
| H | 7.687875  | -0.938051 | -2.116858 | C         | 1.982572     | -3.775007 | 2.363624  |
| H | 7.323790  | 0.614784  | -0.198155 | C         | 3.537067     | -1.028517 | 0.237744  |
| H | 5.311709  | 2.054311  | -0.128411 | C         | 2.791111     | 0.145044  | 0.071307  |
| H | -3.015105 | -3.768478 | -0.650275 | C         | 3.459449     | 1.304551  | -0.354699 |

|   |           |           |           |   |           |           |           |
|---|-----------|-----------|-----------|---|-----------|-----------|-----------|
| C | 4.827395  | 1.278032  | -0.600195 | F | -3.891963 | -2.861715 | -3.056099 |
| C | 5.553295  | 0.112344  | -0.422115 | C | 2.724858  | 2.593987  | -0.555913 |
| C | 4.906439  | -1.036504 | -0.002614 | C | 2.040214  | 2.867254  | -1.748960 |
| C | 1.336179  | 0.182149  | 0.336065  | C | 1.336637  | 4.053938  | -1.913431 |
| C | 0.687245  | 0.952026  | 1.269562  | C | 1.318099  | 5.001484  | -0.904599 |
| C | -0.743891 | 0.871564  | 1.268470  | C | 2.023965  | 4.773237  | 0.262193  |
| C | -1.312179 | 0.050640  | 0.323572  | C | 2.724082  | 3.584279  | 0.436530  |
| C | -2.754205 | -0.093394 | 0.040478  | C | 2.125379  | 1.927478  | -2.934463 |
| C | -3.577381 | 1.047730  | -0.022844 | F | 3.396657  | 1.775000  | -3.336804 |
| C | -4.937923 | 0.929699  | -0.286665 | C | 3.553034  | 3.441865  | 1.695613  |
| C | -5.517699 | -0.308607 | -0.487862 | F | 3.393175  | 2.265044  | 2.314092  |
| C | -4.722860 | -1.437765 | -0.432125 | C | 2.919056  | -3.139793 | -1.768288 |
| C | -3.358345 | -1.341939 | -0.179314 | F | 2.884379  | -1.908180 | -2.262459 |
| C | -3.067497 | 2.443128  | 0.174347  | C | 3.103260  | -1.681201 | 3.102074  |
| C | -2.445308 | 3.157269  | -0.859530 | F | 4.433523  | -1.513311 | 3.047581  |
| C | -2.030114 | 4.469945  | -0.668837 | P | 0.059316  | -0.644924 | -0.505419 |
| C | -2.216986 | 5.099954  | 0.548061  | O | 0.133979  | -1.668453 | -1.570138 |
| C | -2.848078 | 4.421368  | 1.574994  | F | -3.287547 | 1.934385  | -2.714351 |
| C | -3.277684 | 3.111791  | 1.390781  | F | -1.851721 | 3.483514  | -3.121473 |
| C | -2.603942 | -2.634013 | -0.188926 | F | -3.569292 | 1.211468  | 2.800286  |
| C | -2.319602 | -3.332627 | 0.994227  | F | -3.860362 | 3.151282  | 3.679300  |
| C | -1.721614 | -4.584966 | 0.952536  | F | -4.012093 | -2.508392 | 2.432409  |
| C | -1.389658 | -5.161262 | -0.261887 | F | -2.416479 | -3.638710 | 3.335066  |
| C | -1.652564 | -4.484492 | -1.437364 | F | -2.456909 | -1.277530 | -2.776905 |
| C | -2.260672 | -3.235386 | -1.404830 | F | -1.859026 | -3.111857 | -3.727376 |
| C | -2.208014 | 2.544045  | -2.223839 | F | 1.641051  | 0.708103  | -2.680419 |
| F | -1.208534 | 1.647224  | -2.207609 | F | 1.441499  | 2.403440  | -3.985546 |
| C | -4.007918 | 2.450164  | 2.542605  | F | 4.863022  | 3.575910  | 1.432739  |
| F | -5.327729 | 2.368390  | 2.312791  | F | 3.242407  | 4.390043  | 2.596032  |
| C | -2.701024 | -2.771748 | 2.346475  | F | 4.187759  | -3.587083 | -1.921743 |
| F | -2.046883 | -1.639254 | 2.636850  | F | 2.148549  | -3.910009 | -2.549531 |
| C | -2.603287 | -2.601682 | -2.739080 | F | 2.549641  | -0.463146 | 3.069318  |

|                 |           |           |           |   |           |           |           |
|-----------------|-----------|-----------|-----------|---|-----------|-----------|-----------|
| F               | 2.829390  | -2.190332 | 4.314964  | C | 5.616972  | 0.043817  | -0.200595 |
| H               | 1.216728  | 1.559614  | 1.987582  | C | 4.905242  | 1.153928  | -0.626545 |
| H               | -1.326824 | 1.405139  | 2.001880  | C | 3.523666  | 1.201792  | -0.478710 |
| H               | -5.540703 | 1.827862  | -0.338598 | C | 2.825285  | -2.157282 | 1.102760  |
| H               | -6.577973 | -0.392157 | -0.691416 | C | 2.513962  | -2.205705 | 2.470653  |
| H               | -5.155526 | -2.417808 | -0.590371 | C | 1.655890  | -3.174333 | 2.973274  |
| H               | 5.320013  | 2.181741  | -0.936612 | C | 1.115456  | -4.129773 | 2.128219  |
| H               | 6.619171  | 0.099767  | -0.613666 | C | 1.492207  | -4.156300 | 0.799223  |
| H               | 5.460099  | -1.956555 | 0.138789  | C | 2.342238  | -3.183517 | 0.285541  |
| H               | -1.569983 | 5.002073  | -1.488844 | C | 3.200201  | -1.286975 | 3.454751  |
| H               | -1.887088 | 6.121382  | 0.691189  | F | 2.728991  | -1.452388 | 4.701165  |
| H               | -3.013420 | 4.908143  | 2.526397  | C | 2.843210  | -3.381557 | -1.130264 |
| H               | -1.525196 | -5.110363 | 1.876760  | F | 2.056503  | -4.211193 | -1.827437 |
| H               | -0.924882 | -6.139528 | -0.289976 | C | 2.753854  | 2.398758  | -0.947119 |
| H               | -1.381108 | -4.917404 | -2.390352 | C | 2.211382  | 2.447076  | -2.239706 |
| H               | 1.625162  | -5.164908 | -0.691585 | C | 1.399905  | 3.503088  | -2.638502 |
| H               | 1.121176  | -5.615528 | 1.685963  | C | 1.134475  | 4.545294  | -1.768488 |
| H               | 1.791570  | -3.976613 | 3.408510  | C | 1.714113  | 4.551385  | -0.512203 |
| H               | 2.038763  | 5.519604  | 1.044597  | C | 2.519556  | 3.493988  | -0.104054 |
| H               | 0.774753  | 5.928881  | -1.037221 | C | 0.726890  | 0.642547  | 1.368577  |
| H               | 0.810225  | 4.232808  | -2.840815 | C | -0.737927 | 0.553555  | 1.333593  |
|                 |           |           |           | C | -2.745308 | -0.061594 | -0.035064 |
| <b>8PH</b>      |           |           |           | C | -3.568596 | 1.069937  | 0.150227  |
| 95              |           |           |           | C | -4.933621 | 1.006137  | -0.103640 |
| E: -4654.522658 |           |           |           | C | -5.520167 | -0.171531 | -0.528954 |
| P               | 0.105064  | -0.439058 | -0.872160 | C | -4.729597 | -1.291037 | -0.702891 |
| C               | 1.369870  | 0.175159  | 0.293297  | C | -3.357364 | -1.248610 | -0.471010 |
| C               | -1.289930 | 0.022187  | 0.233752  | C | -3.038682 | 2.386363  | 0.635565  |
| O               | 0.238723  | -1.836966 | -1.363034 | C | -2.465163 | 3.319499  | -0.239249 |
| C               | 2.841281  | 0.126095  | 0.103780  | C | -1.941226 | 4.517180  | 0.233806  |
| C               | 3.569558  | -0.997204 | 0.519849  | C | -1.993609 | 4.821776  | 1.582349  |
| C               | 4.949853  | -1.028851 | 0.370231  | C | -2.617861 | 3.946332  | 2.453722  |

|   |           |           |           |                          |              |           |           |
|---|-----------|-----------|-----------|--------------------------|--------------|-----------|-----------|
| C | -3.144231 | 2.746499  | 1.987941  | F                        | 4.064209     | -3.970899 | -1.076144 |
| C | -2.622254 | -2.532540 | -0.713956 | F                        | 4.519465     | -1.541778 | 3.502414  |
| C | -2.346689 | -3.434321 | 0.321704  | F                        | 3.072003     | 0.018153  | 3.173374  |
| C | -1.761836 | -4.666313 | 0.052660  | H                        | 1.231874     | 1.059931  | 2.227505  |
| C | -1.434481 | -5.020824 | -1.243126 | H                        | -1.311419    | 0.891361  | 2.183499  |
| C | -1.691757 | -4.140944 | -2.277252 | H                        | -5.535417    | 1.895239  | 0.037295  |
| C | -2.286051 | -2.914933 | -2.018323 | H                        | -6.584784    | -0.215673 | -0.722152 |
| C | -2.463049 | 3.084018  | -1.733045 | H                        | -5.171947    | -2.224595 | -1.027649 |
| F | -1.970749 | 4.145975  | -2.399201 | H                        | 5.419002     | 1.993180  | -1.078642 |
| C | -3.879716 | 1.870680  | 2.983403  | H                        | 6.693275     | 0.013046  | -0.318237 |
| F | -3.685992 | 2.294896  | 4.242875  | H                        | 5.496754     | -1.904103 | 0.698456  |
| C | -2.680400 | -3.111633 | 1.759657  | H                        | -1.502224    | 5.217053  | -0.462973 |
| F | -2.464586 | -4.169420 | 2.565658  | H                        | -1.575289    | 5.750396  | 1.949728  |
| C | -2.554934 | -2.006047 | -3.195830 | H                        | -2.698860    | 4.191677  | 3.503841  |
| F | -1.914277 | -2.415150 | -4.297338 | H                        | -1.571692    | -5.352384 | 0.866582  |
| C | 2.581768  | 1.409688  | -3.279453 | H                        | -0.971813    | -5.978581 | -1.446918 |
| F | 1.892618  | 1.588151  | -4.416743 | H                        | -1.414319    | -4.395980 | -3.290150 |
| C | 3.216844  | 3.614782  | 1.233106  | H                        | 1.115780     | -4.924100 | 0.138885  |
| F | 2.785653  | 4.689043  | 1.917336  | H                        | 0.424437     | -4.866723 | 2.517701  |
| F | -1.713955 | 2.032669  | -2.094010 | H                        | 1.413166     | -3.180686 | 4.026823  |
| F | -3.695880 | 2.876091  | -2.207550 | H                        | 1.547594     | 5.382671  | 0.159217  |
| F | -5.204157 | 1.894197  | 2.769083  | H                        | 0.497835     | 5.362120  | -2.083089 |
| F | -3.493376 | 0.588901  | 2.949839  | H                        | 0.978806     | 3.506679  | -3.634154 |
| F | -1.929248 | -2.111842 | 2.246309  | H                        | 0.054679     | 0.547735  | -1.873608 |
| F | -3.962493 | -2.760965 | 1.926840  |                          |              |           |           |
| F | -3.865763 | -1.971344 | -3.506011 | <b>{8P}</b> <sub>2</sub> |              |           |           |
| F | -2.176949 | -0.735313 | -2.979664 | 188                      |              |           |           |
| F | 3.884016  | 1.496996  | -3.594598 | E=                       | -9307.783504 |           |           |
| F | 2.353471  | 0.153171  | -2.885859 | C                        | -2.213733    | 0.905997  | 4.077369  |
| F | 3.036621  | 2.558739  | 2.033864  | C                        | -3.270003    | -0.011672 | 3.909656  |
| F | 4.540829  | 3.766083  | 1.071955  | C                        | -4.599999    | 0.358866  | 4.238088  |
| F | 2.994539  | -2.272228 | -1.843627 | C                        | -4.851961    | 1.650928  | 4.725410  |

|   |           |           |           |   |           |           |           |
|---|-----------|-----------|-----------|---|-----------|-----------|-----------|
| C | -3.804911 | 2.564444  | 4.901096  | C | -5.174030 | 0.673056  | -3.320206 |
| C | -2.498154 | 2.187742  | 4.580526  | C | -0.417531 | -0.788005 | -4.499188 |
| C | -3.034600 | -1.411428 | 3.415487  | C | -3.077325 | -3.557782 | 0.224027  |
| C | -2.821020 | -1.741237 | 2.044485  | C | -2.111175 | -4.407760 | -0.364191 |
| C | -2.916711 | -3.098255 | 1.645145  | C | -2.377563 | -4.992141 | -1.609435 |
| C | -3.059451 | -4.099236 | 2.626012  | C | -3.574643 | -4.734400 | -2.282652 |
| C | -3.157168 | -3.781955 | 3.980835  | C | -4.520538 | -3.886883 | -1.705480 |
| C | -3.176461 | -2.436776 | 4.362398  | C | -4.295780 | -3.298657 | -0.449213 |
| C | -2.695875 | -0.651301 | 1.044187  | C | -0.778421 | -4.661855 | 0.296998  |
| C | -3.632833 | 0.312805  | 0.935621  | C | -5.400432 | -2.440445 | 0.136499  |
| C | -3.528792 | 1.251498  | -0.187712 | C | -5.761140 | -0.600404 | 4.049370  |
| C | -2.508274 | 1.086869  | -1.054024 | C | -0.804243 | 0.538417  | 3.684569  |
| C | -2.347112 | 1.908511  | -2.276927 | P | -1.449180 | -0.351332 | -0.375221 |
| C | -2.332529 | 3.330984  | -2.167626 | O | -1.041971 | -1.568911 | -1.300195 |
| C | -2.093216 | 4.109315  | -3.309637 | O | -0.033122 | 0.396568  | 0.242375  |
| C | -1.931400 | 3.514709  | -4.566050 | P | 1.597357  | 0.050720  | 0.924290  |
| C | -2.106481 | 2.134781  | -4.691836 | C | 2.726202  | 1.298643  | 0.005519  |
| C | -2.338488 | 1.320050  | -3.567051 | C | 2.777966  | 2.784243  | 0.070809  |
| C | -2.723948 | 4.049586  | -0.905858 | C | 2.806822  | 3.506601  | 1.290985  |
| C | -1.806877 | 4.247946  | 0.144051  | C | 2.816021  | 4.916008  | 1.266614  |
| C | -2.236418 | 4.877245  | 1.324903  | C | 2.802541  | 5.625565  | 0.065706  |
| C | -3.555681 | 5.320994  | 1.459523  | C | 2.888661  | 4.916404  | -1.136470 |
| C | -4.454913 | 5.155430  | 0.397969  | C | 2.924196  | 3.514934  | -1.151657 |
| C | -4.053291 | 4.526471  | -0.792429 | C | 3.026765  | 2.899758  | 2.649768  |
| C | -2.785822 | -0.086468 | -3.863827 | C | 2.057204  | 3.048053  | 3.670034  |
| C | -4.177094 | -0.357321 | -3.809938 | C | 2.370256  | 2.664238  | 4.983874  |
| C | -4.657865 | -1.586705 | -4.287859 | C | 3.640310  | 2.175360  | 5.304151  |
| C | -3.785501 | -2.536535 | -4.825339 | C | 4.602431  | 2.047656  | 4.299262  |
| C | -2.416502 | -2.264352 | -4.877317 | C | 4.313948  | 2.398240  | 2.969889  |
| C | -1.902133 | -1.046336 | -4.406447 | C | 3.290797  | 2.859446  | -2.455282 |
| C | -0.381888 | 3.792859  | -0.007898 | C | 4.634800  | 2.959956  | -2.893696 |
| C | -5.053752 | 4.348059  | -1.918181 | C | 5.019171  | 2.302757  | -4.074941 |

|   |          |           |           |   |           |           |           |
|---|----------|-----------|-----------|---|-----------|-----------|-----------|
| C | 4.093853 | 1.552676  | -4.812232 | H | -4.490401 | 0.364148  | 1.593113  |
| C | 2.766410 | 1.471369  | -4.378857 | H | -4.293929 | 2.004058  | -0.324536 |
| C | 2.351887 | 2.128466  | -3.208864 | H | 4.517086  | 1.072220  | -1.155890 |
| C | 0.696269 | 3.646254  | 3.387651  | H | 4.307112  | -1.434986 | -1.170262 |
| C | 5.412477 | 2.289477  | 1.932658  | H | 2.749391  | -5.868657 | -1.387947 |
| C | 5.678867 | 3.708839  | -2.086117 | H | 2.496660  | -6.737669 | 0.936915  |
| C | 0.921801 | 2.049752  | -2.755330 | H | 2.432669  | -5.107075 | 2.824856  |
| C | 2.498254 | -1.391625 | -0.018797 | H | 2.965849  | 5.446776  | -2.080448 |
| C | 3.539499 | -0.843583 | -0.696024 | H | 2.782835  | 6.709942  | 0.066762  |
| C | 3.668083 | 0.601870  | -0.677411 | H | 2.866727  | 5.450096  | 2.210568  |
| C | 2.461001 | -2.864854 | 0.233957  | H | -2.059534 | 5.189271  | -3.205232 |
| C | 2.440196 | -3.370636 | 1.562177  | H | -1.733837 | 4.124592  | -5.440925 |
| C | 2.438517 | -4.757380 | 1.797112  | H | -2.103339 | 1.671888  | -5.673808 |
| C | 2.500500 | -5.670179 | 0.745259  | H | -3.322661 | -2.165029 | 5.403159  |
| C | 2.626093 | -5.180930 | -0.556600 | H | -3.262621 | -4.565725 | 4.723105  |
| C | 2.632815 | -3.802874 | -0.830676 | H | -3.139678 | -5.131168 | 2.299332  |
| C | 2.591637 | -2.517266 | 2.787078  | H | -1.530918 | 5.018949  | 2.137559  |
| C | 3.859573 | -1.971248 | 3.101023  | H | -3.880688 | 5.797490  | 2.378895  |
| C | 4.016536 | -1.273032 | 4.308809  | H | -5.476426 | 5.512074  | 0.493242  |
| C | 2.950501 | -1.129463 | 5.202298  | H | -5.725058 | -1.787160 | -4.257149 |
| C | 1.711452 | -1.701189 | 4.900712  | H | -4.170343 | -3.477451 | -5.205407 |
| C | 1.523105 | -2.404426 | 3.701618  | H | -1.736600 | -2.999359 | -5.297593 |
| C | 5.058944 | -2.160253 | 2.194648  | H | 6.051069  | 2.367746  | -4.408102 |
| C | 0.185528 | -3.033057 | 3.397902  | H | 4.406847  | 1.032339  | -5.711658 |
| C | 2.972366 | -3.457794 | -2.255723 | H | 2.047445  | 0.885343  | -4.942073 |
| C | 4.338131 | -3.363384 | -2.617782 | H | 1.620313  | 2.772968  | 5.762358  |
| C | 4.679519 | -3.095002 | -3.953543 | H | 3.881589  | 1.909469  | 6.328378  |
| C | 3.686243 | -2.983318 | -4.933403 | H | 5.597301  | 1.688678  | 4.546582  |
| C | 2.344686 | -3.167505 | -4.581730 | H | -1.638604 | -5.649931 | -2.056061 |
| C | 1.969270 | -3.409458 | -3.248481 | H | -3.766754 | -5.190655 | -3.248157 |
| C | 5.447806 | -3.619544 | -1.612445 | H | -5.453326 | -3.683573 | -2.223388 |
| C | 0.530510 | -3.688201 | -2.891584 | H | -5.870512 | 1.940670  | 4.966838  |

|   |           |           |           |           |              |           |           |
|---|-----------|-----------|-----------|-----------|--------------|-----------|-----------|
| H | -4.008281 | 3.560316  | 5.281675  | F         | -6.052022    | 4.667884  | -1.605551 |
| H | -1.687431 | 2.893574  | 4.717459  | F         | -4.771001    | 4.931673  | -2.800889 |
| H | 5.726353  | -2.995855 | -4.226644 | F         | -5.114236    | 3.303126  | -2.242126 |
| H | 3.957562  | -2.784210 | -5.965408 | F         | -6.715393    | -0.071681 | 4.130846  |
| H | 1.579743  | -3.147248 | -5.352175 | F         | -5.725342    | -1.094894 | 3.071664  |
| H | 0.883699  | -1.603159 | 5.597041  | F         | -5.751774    | -1.397521 | 4.800431  |
| H | 3.087074  | -0.580992 | 6.127936  | F         | -6.198053    | 0.346573  | -3.523356 |
| H | 4.984832  | -0.846983 | 4.552170  | F         | -5.082287    | 0.835028  | -2.240872 |
| F | 0.126901  | 3.742250  | 4.315330  | F         | -5.020432    | 1.639004  | -3.814617 |
| F | 0.776021  | 4.643835  | 2.944981  | F         | -6.380618    | -2.815338 | -0.174508 |
| F | 0.120054  | 3.026783  | 2.693857  | F         | -5.375091    | -2.424237 | 1.229769  |
| F | -0.055638 | 1.071102  | 4.277169  | F         | -5.313973    | -1.405919 | -0.217401 |
| F | -0.616783 | -0.530191 | 3.794068  | F         | -0.242610    | -5.473276 | -0.201015 |
| F | -0.629182 | 0.784996  | 2.630278  | F         | -0.154740    | -3.764017 | 0.224141  |
| F | -0.547518 | -2.790989 | 4.169084  | F         | -0.868121    | -4.916894 | 1.355997  |
| F | -0.208310 | -2.689678 | 2.436100  | F         | 6.374372     | -3.120828 | -1.914839 |
| F | 0.252607  | -4.123964 | 3.335096  | F         | 5.190832     | -3.292398 | -0.600765 |
| F | 5.984559  | -1.916737 | 2.724587  | F         | 5.652794     | -4.695045 | -1.545983 |
| F | 5.129460  | -3.194204 | 1.839314  | F         | 6.681722     | 3.517194  | -2.479043 |
| F | 4.998088  | -1.513770 | 1.312009  | F         | 5.508835     | 4.790486  | -2.105851 |
| F | -0.104122 | -3.718924 | -3.781436 | F         | 5.659855     | 3.407758  | -1.031773 |
| F | 0.448912  | -4.657409 | -2.387387 | F         | 6.384492     | 2.145382  | 2.413358  |
| F | 0.108472  | -2.937557 | -2.215026 | F         | 5.237897     | 1.440798  | 1.262979  |
| F | 0.078321  | -1.573015 | -5.073208 | F         | 5.467340     | 3.191457  | 1.313597  |
| F | -0.203458 | 0.167063  | -4.989386 |           |              |           |           |
| F | 0.028420  | -0.775469 | -3.498823 | <b>80</b> |              |           |           |
| F | 0.315150  | 1.497201  | -3.466517 | 94        |              |           |           |
| F | 0.830190  | 1.561140  | -1.778018 | E=        | -2272.046943 |           |           |
| F | 0.489074  | 3.048665  | -2.662476 | C         | 1.555267     | 3.111538  | -2.324349 |
| F | 0.253256  | 4.223256  | 0.764131  | C         | 1.912365     | 3.040423  | -0.952648 |
| F | -0.295933 | 2.700234  | 0.045580  | C         | 1.328887     | 3.921884  | -0.016068 |
| F | 0.025282  | 4.103523  | -0.972080 | C         | 0.393322     | 4.873328  | -0.461954 |



|   |           |           |           |   |           |           |           |
|---|-----------|-----------|-----------|---|-----------|-----------|-----------|
| C | 0.034460  | 4.949760  | -1.809635 | C | -3.815008 | 2.836815  | 2.801501  |
| C | 0.612021  | 4.067753  | -2.732543 | C | -3.242748 | 3.907769  | 2.100593  |
| C | 2.977707  | 2.073009  | -0.526854 | C | -2.817784 | 3.725484  | 0.781080  |
| C | 2.675353  | 0.836926  | 0.086227  | C | -2.951770 | 2.480166  | 0.140539  |
| C | 3.717579  | -0.050408 | 0.446778  | C | -4.574448 | 0.431689  | 2.970939  |
| C | 5.050630  | 0.310905  | 0.204519  | C | -2.423938 | 2.317704  | -1.268456 |
| C | 5.356280  | 1.542016  | -0.389991 | C | -1.798245 | -3.060784 | -0.925758 |
| C | 4.323336  | 2.414055  | -0.750683 | C | -1.362422 | -3.301936 | -2.252413 |
| C | 1.267311  | 0.461136  | 0.348576  | C | -0.369144 | -4.271272 | -2.473218 |
| C | 0.550833  | 0.646177  | 1.486458  | C | 0.173179  | -5.000984 | -1.408213 |
| C | -0.846321 | 0.180875  | 1.467921  | C | -0.273635 | -4.765214 | -0.103062 |
| C | -1.274370 | -0.398532 | 0.314943  | C | -1.257350 | -3.797155 | 0.156132  |
| P | 0.209200  | -0.556774 | -0.783921 | C | -1.912418 | -2.509776 | -3.421017 |
| O | 0.058984  | -0.094381 | -2.330675 | C | -1.719196 | -3.563082 | 1.579853  |
| C | 3.408970  | -1.362163 | 1.101772  | H | -1.491326 | 0.339861  | 2.323266  |
| C | 3.141162  | -2.505719 | 0.319261  | H | 0.959910  | 1.128367  | 2.366250  |
| C | 2.855380  | -3.720938 | 0.969490  | H | 5.842166  | -0.377326 | 0.483691  |
| C | 2.827291  | -3.801619 | 2.363766  | H | 6.389645  | 1.817626  | -0.572373 |
| C | 3.096446  | -2.660252 | 3.133461  | H | 4.549196  | 3.370070  | -1.212569 |
| C | 3.395064  | -1.436629 | 2.516087  | H | -4.375307 | -3.378277 | -1.490122 |
| C | 3.168028  | -2.476961 | -1.196704 | H | -6.274325 | -1.815249 | -1.082428 |
| C | 3.714343  | -0.217324 | 3.357866  | H | -5.838263 | 0.388761  | -0.002189 |
| C | 1.674630  | 3.892992  | 1.459921  | H | 2.649756  | -4.601147 | 0.368352  |
| C | 2.155046  | 2.165869  | -3.344548 | H | 2.600324  | -4.744640 | 2.851184  |
| C | -2.640697 | -0.814598 | -0.047224 | H | 3.078634  | -2.721615 | 4.217757  |
| C | -3.723952 | 0.070954  | 0.198560  | H | -0.042853 | 5.559696  | 0.259032  |
| C | -5.021758 | -0.303579 | -0.181918 | H | -0.686121 | 5.690372  | -2.142716 |
| C | -5.266121 | -1.538069 | -0.793646 | H | 0.330934  | 4.120112  | -3.779965 |
| C | -4.199738 | -2.411051 | -1.029801 | H | -2.370929 | 4.548708  | 0.232862  |
| C | -2.887876 | -2.063308 | -0.669383 | H | -3.130455 | 4.874476  | 2.581419  |
| C | -3.539429 | 1.409236  | 0.850503  | H | -4.140276 | 2.973018  | 3.828930  |
| C | -3.973491 | 1.584200  | 2.187591  | H | 0.140060  | -5.333419 | 0.724557  |

|                 |           |           |           |   |           |           |           |
|-----------------|-----------|-----------|-----------|---|-----------|-----------|-----------|
| H               | 0.934273  | -5.752276 | -1.596319 | C | -0.521718 | -1.235391 | 0.341297  |
| H               | -0.021138 | -4.451630 | -3.485733 | O | -0.749477 | 0.306884  | -2.031339 |
| H               | -1.464885 | -2.848659 | -4.359657 | C | 1.236528  | 2.469724  | -0.013090 |
| H               | -2.999229 | -2.608303 | -3.505809 | C | 0.429315  | 3.581399  | -0.315006 |
| H               | -1.678867 | -1.445565 | -3.303652 | C | 1.015502  | 4.798857  | -0.652577 |
| H               | 1.875845  | 2.466221  | -4.358788 | C | 2.391353  | 4.934525  | -0.718478 |
| H               | 3.247581  | 2.137885  | -3.283637 | C | 3.191993  | 3.841671  | -0.429790 |
| H               | 1.778267  | 1.149801  | -3.181264 | C | 2.638689  | 2.615215  | -0.070781 |
| H               | 4.065117  | -2.982419 | -1.574448 | C | -1.060325 | 3.530720  | -0.248601 |
| H               | 2.293651  | -2.996136 | -1.604489 | C | -1.809706 | 3.510021  | -1.435999 |
| H               | 3.175455  | -1.459621 | -1.596788 | C | -3.200418 | 3.502210  | -1.343624 |
| H               | 3.519070  | -0.409749 | 4.416776  | C | -3.833026 | 3.529336  | -0.111981 |
| H               | 4.767133  | 0.068902  | 3.252107  | C | -3.083748 | 3.556387  | 1.054349  |
| H               | 3.122930  | 0.651862  | 3.050148  | C | -1.693699 | 3.560103  | 1.004355  |
| H               | -1.408885 | -4.387715 | 2.227943  | C | -1.145713 | 3.457217  | -2.787608 |
| H               | -1.284900 | -2.640135 | 1.981846  | C | -0.892621 | 3.587591  | 2.280751  |
| H               | -2.808244 | -3.466087 | 1.638852  | C | 3.597363  | 1.508421  | 0.228583  |
| H               | 1.944014  | 4.894481  | 1.812804  | C | 3.850080  | 0.516762  | -0.728571 |
| H               | 0.806402  | 3.561419  | 2.042415  | C | 4.802628  | -0.457788 | -0.442097 |
| H               | 2.510090  | 3.223359  | 1.678666  | C | 5.470544  | -0.471545 | 0.771767  |
| H               | -4.640974 | 0.678108  | 4.034774  | C | 5.201233  | 0.505057  | 1.719188  |
| H               | -5.582670 | 0.188186  | 2.617960  | C | 4.273183  | 1.509590  | 1.458233  |
| H               | -3.976460 | -0.481242 | 2.864118  | C | 1.083808  | 0.284408  | 1.245316  |
| H               | -2.548869 | 3.242571  | -1.839200 | C | 0.449853  | -1.044145 | 1.244042  |
| H               | -1.347874 | 2.100858  | -1.255426 | C | -1.218417 | -2.501052 | 0.026333  |
| H               | -2.915660 | 1.505274  | -1.809445 | C | -2.619917 | -2.580284 | 0.054457  |
|                 |           |           |           | C | -3.253813 | -3.780529 | -0.256829 |
| <b>8OH</b>      |           |           |           | C | -2.520112 | -4.902089 | -0.606897 |
| 95              |           |           |           | C | -1.136841 | -4.826288 | -0.639304 |
| E: -2272.681347 |           |           |           | C | -0.473867 | -3.642389 | -0.324965 |
| P               | -0.754382 | 0.349303  | -0.536399 | C | 3.097898  | 0.483898  | -2.031584 |
| C               | 0.644487  | 1.158445  | 0.324199  | C | 3.985713  | 2.563955  | 2.498452  |

|   |           |           |           |   |           |           |           |
|---|-----------|-----------|-----------|---|-----------|-----------|-----------|
| C | -3.467704 | -1.420908 | 0.459121  | H | -4.519552 | 0.208851  | 3.240135  |
| C | -3.590665 | -1.101964 | 1.819434  | H | 3.714389  | -4.600883 | 1.430455  |
| C | -4.417017 | -0.043305 | 2.189692  | H | 4.870525  | -3.806805 | -0.602472 |
| C | -5.116326 | 0.675236  | 1.233753  | H | 3.562112  | -2.918248 | -2.501481 |
| C | -4.990541 | 0.350086  | -0.107964 | H | 1.536534  | -2.471099 | -3.569927 |
| C | -4.167693 | -0.694951 | -0.517996 | H | 0.098588  | -3.345728 | -3.020660 |
| C | 1.018286  | -3.645034 | -0.390746 | H | 0.384668  | -1.699027 | -2.478105 |
| C | 1.664395  | -3.187173 | -1.548374 | H | -1.891678 | 3.531192  | -3.580741 |
| C | 3.053511  | -3.260492 | -1.605793 | H | -0.424808 | 4.267024  | -2.918736 |
| C | 3.788527  | -3.763006 | -0.542667 | H | -0.618292 | 2.507237  | -2.909749 |
| C | 3.139851  | -4.208475 | 0.597726  | H | 3.555603  | -0.222757 | -2.725952 |
| C | 1.750248  | -4.165557 | 0.684575  | H | 2.058776  | 0.173123  | -1.882097 |
| C | -2.857995 | -1.891343 | 2.873835  | H | 3.068502  | 1.468178  | -2.505317 |
| C | -4.005516 | -0.999091 | -1.985834 | H | 4.448694  | 2.303908  | 3.452139  |
| C | 0.880952  | -2.645646 | -2.714627 | H | 4.366911  | 3.542477  | 2.193429  |
| C | 1.053414  | -4.692418 | 1.914534  | H | 2.909988  | 2.686177  | 2.658841  |
| H | 0.804000  | -1.813935 | 1.919347  | H | 0.570689  | -5.653005 | 1.710917  |
| H | 1.893158  | 0.492719  | 1.933098  | H | 1.762956  | -4.839347 | 2.731060  |
| H | 4.272194  | 3.925623  | -0.480957 | H | 0.263531  | -4.018652 | 2.258384  |
| H | 2.837113  | 5.883996  | -0.991862 | H | -1.536212 | 3.798658  | 3.136440  |
| H | 0.369110  | 5.643720  | -0.863871 | H | -0.402210 | 2.624908  | 2.456370  |
| H | -0.546500 | -5.693243 | -0.915813 | H | -0.107561 | 4.346959  | 2.242584  |
| H | -3.022985 | -5.830599 | -0.851913 | H | -3.215896 | -1.630290 | 3.871284  |
| H | -4.336861 | -3.822671 | -0.214961 | H | -2.991367 | -2.966446 | 2.729946  |
| H | 5.013843  | -1.219718 | -1.182335 | H | -1.782955 | -1.691345 | 2.837510  |
| H | 6.200835  | -1.245430 | 0.980663  | H | -4.662856 | -0.363935 | -2.582072 |
| H | 5.718989  | 0.493229  | 2.672956  | H | -2.976527 | -0.815939 | -2.311516 |
| H | -3.581906 | 3.573506  | 2.017940  | H | -4.240187 | -2.041940 | -2.211451 |
| H | -4.915895 | 3.525606  | -0.059415 | H | -1.911618 | 0.906370  | 0.046232  |
| H | -3.789544 | 3.474430  | -2.254134 |   |           |           |           |
| H | -5.527572 | 0.923516  | -0.855772 |   |           |           |           |
| H | -5.758904 | 1.495206  | 1.535048  |   |           |           |           |

{80}₂

|                 |           |           |           |           |           |           |           |
|-----------------|-----------|-----------|-----------|-----------|-----------|-----------|-----------|
| E= -4544.146046 |           |           | C         | -3.798743 | 5.003518  | 2.134384  |           |
| C               | -2.239909 | -3.416480 | -2.365975 | C         | -2.417573 | 4.864534  | 2.289291  |
| C               | -3.335195 | -2.640346 | -2.794824 | C         | -1.855101 | 3.650413  | 2.712841  |
| C               | -4.652227 | -3.165786 | -2.736551 | C         | -0.192677 | -2.851521 | 2.519591  |
| C               | -4.851891 | -4.463944 | -2.241264 | C         | -4.794415 | -2.116562 | 4.536501  |
| C               | -3.766176 | -5.242435 | -1.820708 | C         | -5.062048 | 1.567127  | 3.178472  |
| C               | -2.472798 | -4.718084 | -1.887866 | C         | -0.358339 | 3.551373  | 2.883933  |
| C               | -3.157081 | -1.257106 | -3.355055 | C         | -3.239313 | 2.458941  | -2.365944 |
| C               | -2.932569 | -0.100585 | -2.551258 | C         | -2.303383 | 3.507672  | -2.527523 |
| C               | -3.084935 | 1.180450  | -3.139357 | C         | -2.572797 | 4.761654  | -1.963573 |
| C               | -3.294435 | 1.282991  | -4.528613 | C         | -3.742784 | 4.984295  | -1.232676 |
| C               | -3.403514 | 0.149199  | -5.333834 | C         | -4.658382 | 3.945153  | -1.065359 |
| C               | -3.366186 | -1.113849 | -4.734847 | C         | -4.430576 | 2.680070  | -1.633163 |
| C               | -2.736011 | -0.257586 | -1.088065 | C         | -0.997491 | 3.293337  | -3.253250 |
| C               | -3.623652 | -0.932128 | -0.328945 | C         | -5.504393 | 1.623642  | -1.457897 |
| C               | -3.452952 | -0.894829 | 1.128216  | C         | -5.853805 | -2.346925 | -3.172140 |
| C               | -2.424614 | -0.176678 | 1.624033  | C         | -0.842084 | -2.849013 | -2.377588 |
| C               | -2.200489 | 0.015542  | 3.076403  | P         | -1.448799 | 0.481114  | 0.118718  |
| C               | -2.120294 | -1.125356 | 3.929345  | O         | -1.081971 | 2.015335  | -0.005762 |
| C               | -1.821768 | -0.952115 | 5.288804  | O         | -0.011126 | -0.455732 | 0.081062  |
| C               | -1.663816 | 0.326717  | 5.834655  | P         | 1.587304  | -0.607970 | -0.734365 |
| C               | -1.901956 | 1.442827  | 5.029505  | C         | 2.792158  | -0.914486 | 0.725128  |
| C               | -2.194580 | 1.308462  | 3.658711  | C         | 2.913351  | -2.072962 | 1.650974  |
| C               | -2.501748 | -2.506177 | 3.471656  | C         | 2.952604  | -3.419576 | 1.207630  |
| C               | -1.597073 | -3.326362 | 2.770558  | C         | 3.029421  | -4.462653 | 2.152722  |
| C               | -2.019253 | -4.587595 | 2.316696  | C         | 3.073368  | -4.204666 | 3.522884  |
| C               | -3.318266 | -5.040081 | 2.568318  | C         | 3.149222  | -2.877213 | 3.956092  |
| C               | -4.203361 | -4.236478 | 3.298903  | C         | 3.118250  | -1.812990 | 3.043908  |
| C               | -3.808874 | -2.969844 | 3.761458  | C         | 3.116634  | -3.854127 | -0.223169 |
| C               | -2.702523 | 2.551041  | 2.977195  | C         | 2.135366  | -4.660325 | -0.847782 |
| C               | -4.105912 | 2.687244  | 2.822752  | C         | 2.403874  | -5.230764 | -2.102371 |
| C               | -4.635247 | 3.915320  | 2.395475  | C         | 3.642657  | -5.045389 | -2.723398 |

|   |           |           |           |   |           |           |           |
|---|-----------|-----------|-----------|---|-----------|-----------|-----------|
| C | 4.617185  | -4.264988 | -2.096453 | C | 3.644039  | 5.581603  | 1.576601  |
| C | 4.371932  | -3.658772 | -0.853185 | C | 2.288578  | 5.457560  | 1.253008  |
| C | 3.478774  | -0.452593 | 3.575733  | C | 1.875916  | 4.751997  | 0.108926  |
| C | 4.834402  | -0.208412 | 3.909351  | C | 5.307668  | 3.910978  | -1.419723 |
| C | 5.210192  | 1.073003  | 4.347243  | C | 0.418775  | 4.693384  | -0.276314 |
| C | 4.264876  | 2.101641  | 4.450776  | H | -4.490554 | -1.423758 | -0.749819 |
| C | 2.926802  | 1.846731  | 4.132799  | H | -4.178535 | -1.387812 | 1.761461  |
| C | 2.521121  | 0.572123  | 3.704681  | H | 4.592723  | 0.062214  | 1.366506  |
| C | 0.810293  | -4.954938 | -0.179116 | H | 4.263864  | 1.951414  | -0.262361 |
| C | 5.484232  | -2.868175 | -0.195774 | H | 2.501298  | 5.391782  | -2.943527 |
| C | 5.896869  | -1.279765 | 3.746716  | H | 2.161797  | 4.506655  | -5.251193 |
| C | 1.080271  | 0.299629  | 3.377983  | H | 2.138449  | 2.035073  | -5.594730 |
| C | 2.436829  | 1.118427  | -1.015875 | H | 3.270131  | -2.651850 | 5.011052  |
| C | 3.516118  | 1.176730  | -0.194343 | H | 3.105335  | -5.020859 | 4.236375  |
| C | 3.713031  | 0.080936  | 0.736612  | H | 3.086949  | -5.485174 | 1.792152  |
| C | 2.324471  | 2.058291  | -2.173331 | H | -1.738731 | -1.831907 | 5.919210  |
| C | 2.253495  | 1.562437  | -3.503560 | H | -1.420261 | 0.449534  | 6.884412  |
| C | 2.181141  | 2.449851  | -4.592375 | H | -1.901589 | 2.438125  | 5.463013  |
| C | 2.220240  | 3.830725  | -4.405035 | H | -3.519679 | -2.007498 | -5.331700 |
| C | 2.394570  | 4.324031  | -3.110341 | H | -3.560746 | 0.246600  | -6.402558 |
| C | 2.472314  | 3.469070  | -1.998047 | H | -3.417295 | 2.272133  | -4.958200 |
| C | 2.421307  | 0.117041  | -3.869934 | H | -1.323895 | -5.213630 | 1.766444  |
| C | 3.707391  | -0.471314 | -3.805271 | H | -3.638195 | -6.011703 | 2.205661  |
| C | 3.873649  | -1.788683 | -4.261112 | H | -5.208397 | -4.590737 | 3.509050  |
| C | 2.798293  | -2.509936 | -4.789096 | H | -5.711177 | 4.021312  | 2.289809  |
| C | 1.539593  | -1.909735 | -4.881285 | H | -4.220438 | 5.952472  | 1.818888  |
| C | 1.341587  | -0.595038 | -4.433837 | H | -1.765338 | 5.709595  | 2.090303  |
| C | 4.913989  | 0.295641  | -3.303644 | H | 6.250365  | 1.267367  | 4.592788  |
| C | -0.018170 | 0.047105  | -4.557314 | H | 4.570357  | 3.092783  | 4.770154  |
| C | 2.855859  | 4.156830  | -0.715466 | H | 2.191959  | 2.642033  | 4.203870  |
| C | 4.231423  | 4.355766  | -0.444245 | H | 1.644796  | -5.842811 | -2.581402 |
| C | 4.611406  | 5.042352  | 0.720677  | H | 3.850812  | -5.515190 | -3.679387 |

|   |           |           |           |            |           |           |           |
|---|-----------|-----------|-----------|------------|-----------|-----------|-----------|
| H | 5.588767  | -4.135464 | -2.564481 | H          | 0.946308  | 0.020565  | 2.326104  |
| H | -1.857390 | 5.567401  | -2.094673 | H          | 0.693864  | -0.522293 | 3.985302  |
| H | -3.937409 | 5.959274  | -0.798151 | H          | 0.446962  | -3.669392 | 2.193057  |
| H | -5.570078 | 4.112368  | -0.499226 | H          | -0.159954 | -2.063549 | 1.756630  |
| H | -5.860034 | -4.864167 | -2.185130 | H          | 0.247700  | -2.440123 | 3.429957  |
| H | -3.929325 | -6.246493 | -1.442276 | H          | -5.782266 | -2.585877 | 4.557953  |
| H | -1.632226 | -5.320328 | -1.563888 | H          | -4.466930 | -1.966876 | 5.570944  |
| H | 5.666942  | 5.171794  | 0.942861  | H          | -4.898226 | -1.119002 | 4.095386  |
| H | 3.944782  | 6.118424  | 2.470843  | H          | -6.783206 | -2.819875 | -2.841508 |
| H | 1.540768  | 5.932703  | 1.880825  | H          | -5.822392 | -1.329942 | -2.764133 |
| H | 0.703911  | -2.461348 | -5.302020 | H          | -5.897178 | -2.242657 | -4.261554 |
| H | 2.942595  | -3.529228 | -5.130413 | H          | -6.096277 | 1.922988  | 3.163703  |
| H | 4.856160  | -2.247204 | -4.208476 | H          | -4.983914 | 0.736009  | 2.469421  |
| H | 0.228014  | -5.651641 | -0.787015 | H          | -4.852916 | 1.170495  | 4.178491  |
| H | 0.946172  | -5.411113 | 0.806239  | H          | -6.495024 | 2.088007  | -1.425485 |
| H | 0.218981  | -4.045162 | -0.038495 | H          | -5.499777 | 0.891373  | -2.270243 |
| H | -0.080736 | -3.622893 | -2.507189 | H          | -5.361839 | 1.081314  | -0.515282 |
| H | -0.707936 | -2.113697 | -3.171546 | H          | -0.491268 | 4.243777  | -3.437411 |
| H | -0.634799 | -2.335372 | -1.430918 | H          | -0.330438 | 2.680779  | -2.636638 |
| H | -0.753893 | -0.659943 | -4.943929 | H          | -1.120024 | 2.784920  | -4.212973 |
| H | -0.376216 | 0.414017  | -3.590227 | H          | 6.262699  | 3.756645  | -0.907100 |
| H | -0.001898 | 0.909997  | -5.230869 | H          | 5.046729  | 2.992318  | -1.953138 |
| H | 5.839548  | -0.215562 | -3.584557 | H          | 5.459866  | 4.680236  | -2.186676 |
| H | 4.942168  | 1.308634  | -3.719987 | H          | 6.896989  | -0.853773 | 3.869706  |
| H | 4.901356  | 0.390150  | -2.212039 | H          | 5.778969  | -2.083651 | 4.480969  |
| H | -0.198976 | 5.288559  | 0.401689  | H          | 5.842803  | -1.748910 | 2.756953  |
| H | 0.281226  | 5.087657  | -1.289164 | H          | 6.438634  | -3.054526 | -0.696810 |
| H | 0.019715  | 3.673559  | -0.271603 | H          | 5.282639  | -1.792828 | -0.242640 |
| H | 0.110720  | 4.531152  | 2.776114  | H          | 5.594156  | -3.136787 | 0.860435  |
| H | -0.089401 | 3.161542  | 3.870837  |            |           |           |           |
| H | 0.067966  | 2.892743  | 2.119583  | <b>33A</b> |           |           |           |
| H | 0.462098  | 1.169883  | 3.577097  | 68         |           |           |           |

|                 |           |           |           |           |           |           |           |
|-----------------|-----------|-----------|-----------|-----------|-----------|-----------|-----------|
| E= -1431.315377 |           |           | C         | -2.798646 | 2.112386  | -1.319739 |           |
| C               | -1.823965 | -1.085080 | -2.001272 | H         | 3.287643  | -2.873042 | 1.734503  |
| C               | -0.711776 | -0.645850 | -1.180789 | H         | 1.787612  | -2.181874 | 1.164186  |
| C               | -1.213084 | -0.009281 | -0.054157 | H         | 2.921033  | -2.869753 | 0.026097  |
| C               | -2.708225 | -0.009651 | -0.099581 | H         | 5.409986  | -1.737163 | 1.281254  |
| C               | -2.975199 | -0.729473 | -1.398206 | H         | 5.043377  | -1.733873 | -0.427153 |
| P               | 0.132732  | 0.496296  | 0.890379  | H         | 5.423895  | -0.235734 | 0.387618  |
| O               | 0.209228  | 1.214557  | 2.184203  | H         | 3.821078  | -0.772847 | 2.876706  |
| C               | 0.728857  | -0.700167 | -1.235780 | H         | 3.834987  | 0.728582  | 1.983070  |
| C               | 1.739196  | -1.219529 | -2.137203 | H         | 2.321048  | -0.081679 | 2.306388  |
| C               | 2.956470  | -0.953442 | -1.624412 | H         | 3.101774  | 2.992390  | 0.710274  |
| C               | 2.843957  | -0.219264 | -0.311347 | H         | 1.966508  | 1.773792  | 1.238721  |
| C               | 1.360902  | -0.106414 | -0.152350 | H         | 3.677963  | 1.549941  | 1.510533  |
| C               | -3.292164 | 1.371964  | -0.112173 | H         | 4.593086  | 2.539694  | -1.179449 |
| H               | -3.972728 | -0.920713 | -1.770734 | H         | 5.169275  | 1.097245  | -0.379190 |
| H               | -1.733683 | -1.611405 | -2.942121 | H         | 4.521623  | 0.998172  | -1.999004 |
| C               | 3.064941  | 1.253599  | -0.489788 | H         | 2.193851  | 2.853503  | -1.560494 |
| H               | 3.905550  | -1.218231 | -2.071118 | H         | 2.122388  | 1.311981  | -2.380049 |
| H               | 1.538236  | -1.734897 | -3.066921 | H         | 1.058586  | 1.634904  | -1.032047 |
| C               | 3.493279  | -0.988850 | 0.800461  | H         | -3.215189 | 3.097938  | -1.328721 |
| C               | -3.311666 | -1.216558 | 0.555578  | H         | -1.731079 | 2.176663  | -1.287066 |
| C               | 2.944139  | 1.941748  | 0.837562  | H         | -3.097629 | 1.590727  | -2.204827 |
| C               | 4.435451  | 1.489051  | -1.052161 | H         | -5.205297 | 2.267408  | -0.166958 |
| C               | 2.036216  | 1.802860  | -1.433206 | H         | -5.087737 | 0.760197  | -1.043064 |
| C               | 3.357896  | -0.223875 | 2.083616  | H         | -5.140796 | 0.753688  | 0.703421  |
| C               | 2.824460  | -2.324071 | 0.941413  | H         | -3.289571 | 3.088813  | 1.119622  |
| C               | 4.946803  | -1.188191 | 0.488164  | H         | -3.225071 | 1.575094  | 1.990001  |
| C               | -4.806993 | -1.138696 | 0.466487  | H         | -1.805461 | 2.167538  | 1.161277  |
| C               | -2.833096 | -2.455598 | -0.141379 | H         | -3.263551 | -3.316525 | 0.325968  |
| C               | -2.898352 | -1.262287 | 1.996786  | H         | -3.127927 | -2.422978 | -1.169441 |
| C               | -4.788754 | 1.281857  | -0.157976 | H         | -1.766430 | -2.511140 | -0.077827 |
| C               | -2.873029 | 2.103262  | 1.128604  | H         | -3.328806 | -2.123214 | 2.464133  |

|   |           |           |           |   |           |           |           |
|---|-----------|-----------|-----------|---|-----------|-----------|-----------|
| H | -1.831686 | -1.317828 | 2.060338  | C | -4.548718 | 1.863449  | 0.590954  |
| H | -3.239732 | -0.378438 | 2.493948  | C | -3.111109 | -1.538608 | -1.836404 |
| H | -5.237447 | -1.999623 | 0.933834  | C | -3.225424 | -2.600799 | 0.381234  |
| H | -5.148373 | -0.254847 | 0.963649  | C | 5.090966  | -1.160275 | -0.367147 |
| H | -5.101824 | -1.106076 | -0.561575 | C | 3.226450  | -2.600487 | 0.381779  |

### 33AH

69

E: -1431.944939

|   |           |           |           |   |           |           |           |
|---|-----------|-----------|-----------|---|-----------|-----------|-----------|
| P | -0.000011 | -0.169949 | -1.068801 | H | -3.587743 | -3.459519 | -0.191454 |
| C | -1.307083 | -0.226573 | 0.179842  | H | -2.147426 | -2.719330 | 0.516411  |
| C | -0.734024 | -0.360315 | 1.395443  | H | -3.697675 | -2.634610 | 1.364852  |
| C | 0.734138  | -0.360733 | 1.395426  | H | -5.535619 | -2.097395 | -0.715872 |
| C | 1.307175  | -0.227550 | 0.179758  | H | -5.474777 | -0.974371 | 0.639100  |
| O | 0.000411  | 0.902131  | -2.108328 | H | -5.444805 | -0.367763 | -1.026727 |
| C | 2.811646  | -0.077363 | 0.313077  | H | -3.755546 | -2.298438 | -2.288565 |
| C | 2.947717  | -0.213245 | 1.824325  | H | -3.158272 | -0.652282 | -2.463228 |
| C | 1.762577  | -0.368443 | 2.429750  | H | -2.092826 | -1.928866 | -1.875331 |
| C | -2.811632 | -0.077404 | 0.313202  | H | -3.530269 | 2.708441  | -1.778864 |
| C | -2.947643 | -0.213722 | 1.824423  | H | -2.441968 | 1.371752  | -2.123935 |
| C | -1.762445 | -0.368753 | 2.429769  | H | -4.204788 | 1.104680  | -2.029656 |
| C | 3.231891  | 1.426792  | -0.082698 | H | -4.816998 | 2.857035  | 0.220650  |
| C | 2.152283  | 2.414384  | 0.408874  | H | -5.388634 | 1.204218  | 0.382259  |
| C | 3.562326  | -1.303265 | -0.383461 | H | -4.435269 | 1.942903  | 1.674900  |
| C | 3.111011  | -1.538992 | -1.836076 | H | -2.543280 | 3.432831  | 0.320887  |
| C | -3.232371 | 1.426643  | -0.082469 | H | -1.890626 | 2.250753  | 1.456853  |
| C | -2.153156 | 2.414631  | 0.409207  | H | -1.247797 | 2.359947  | -0.196818 |
| C | -3.561883 | -1.303440 | -0.383549 | H | 2.542398  | 3.432659  | 0.321381  |
| C | -5.090557 | -1.160824 | -0.366881 | H | 1.247329  | 2.360031  | -0.197764 |
| C | 4.547881  | 1.864019  | 0.591145  | H | 1.889166  | 2.249867  | 1.456275  |
| C | 3.359396  | 1.643264  | -1.596957 | H | 4.815940  | 2.857699  | 0.220937  |
| C | -3.359559 | 1.642895  | -1.596757 | H | 4.434042  | 1.943413  | 1.675059  |



|                           |           |           |           |   |           |           |           |
|---------------------------|-----------|-----------|-----------|---|-----------|-----------|-----------|
| H                         | 5.388073  | 1.205064  | 0.382714  | C | -3.651844 | -1.620858 | 4.136554  |
| H                         | 3.530262  | 2.708827  | -1.778811 | C | -2.130395 | -3.175831 | 1.958380  |
| H                         | 4.204644  | 1.105069  | -2.029828 | C | -2.499501 | -3.603042 | 3.561892  |
| H                         | 2.441861  | 1.372407  | -2.124362 | C | -2.168652 | 2.315350  | -1.811244 |
| H                         | 3.588638  | -3.459271 | -0.190900 | C | -3.112440 | 2.930306  | -0.820743 |
| H                         | 3.699187  | -2.633990 | 1.365180  | C | -3.958901 | 4.234650  | -1.507906 |
| H                         | 2.148528  | -2.719138 | 0.517482  | C | -2.921352 | 2.060889  | -3.083522 |
| H                         | 3.755865  | -2.298243 | -2.288613 | C | -0.796634 | 3.460503  | -2.026197 |
| H                         | 2.093044  | -1.930197 | -1.874250 | C | -1.467498 | 4.953720  | -2.484720 |
| H                         | 3.156914  | -0.652653 | -2.462982 | H | -3.020920 | 2.923776  | -3.579014 |
| H                         | 5.536155  | -2.096631 | -0.716554 | C | 0.023735  | 3.703498  | -0.557201 |
| H                         | 5.444962  | -0.366892 | -1.026733 | C | 0.298959  | 2.965136  | -3.227983 |
| H                         | 5.475331  | -0.974148 | 0.638841  | O | 1.529323  | -1.657929 | 0.816718  |
| H                         | -0.000564 | -1.480811 | -1.602494 | C | 1.653000  | -0.399728 | -1.682194 |
|                           |           |           |           | C | 1.634675  | -1.572468 | -2.617259 |
| <b>{33A}</b> <sub>2</sub> |           |           |           | C | 0.263123  | -2.150619 | -2.803230 |
| 136                       |           |           |           | C | 0.182977  | -2.876564 | -4.338346 |
| E= -2862.722465           |           |           |           | C | -4.064193 | 1.720044  | -0.100027 |
| P                         | -1.611604 | 0.565260  | 0.439498  | C | -2.207769 | 3.699522  | 0.395759  |
| C                         | -2.376952 | -1.096078 | 0.448481  | C | -1.042494 | -1.105155 | 3.409309  |
| C                         | -3.027271 | -1.196855 | -0.735561 | C | -3.144852 | 0.597297  | 2.660703  |
| C                         | -3.817165 | -2.461642 | -0.573136 | C | -2.827443 | -4.383789 | 0.986288  |
| C                         | -3.974340 | -2.609653 | 1.110924  | C | -0.434576 | -3.141342 | 1.844315  |
| C                         | -2.797128 | -1.864261 | 1.666407  | C | 2.469291  | 0.640901  | -1.932309 |
| C                         | -2.041336 | 0.911404  | -1.298677 | C | 2.975929  | 1.410028  | -0.774165 |
| C                         | -2.847843 | -0.101766 | -1.689906 | C | 2.086665  | 2.433941  | 2.781932  |
| O                         | 0.048939  | 0.448400  | 0.513733  | C | 2.557808  | 2.167863  | 4.393523  |
| P                         | 1.397677  | -0.352826 | 0.120957  | C | 3.615289  | 0.164679  | 2.448811  |
| C                         | 2.606853  | 0.977227  | 0.441209  | C | 4.781542  | 0.561685  | 3.620237  |
| C                         | 3.167304  | 1.419782  | 1.760315  | C | 2.287793  | 4.088080  | 2.445222  |
| C                         | 4.074974  | 2.522138  | 1.301027  | C | 0.439234  | 2.064153  | 2.583869  |
| C                         | -2.660468 | -1.015240 | 2.895426  | C | 1.911228  | -0.933128 | -3.945703 |

|   |           |           |           |   |           |           |           |
|---|-----------|-----------|-----------|---|-----------|-----------|-----------|
| C | 2.840709  | -2.869944 | -2.297824 | H | -0.795558 | -3.344855 | -4.486627 |
| C | 2.484658  | -4.131134 | -3.380704 | H | 0.325707  | -2.144421 | -5.138057 |
| C | 4.425212  | -2.320263 | -2.575671 | H | 0.945385  | -3.651645 | -4.454877 |
| C | 2.683783  | -3.510648 | -0.731021 | H | -1.887017 | -1.250639 | -2.914240 |
| C | -0.055342 | -3.339610 | -1.630677 | H | -0.861888 | -0.428564 | -1.728858 |
| C | -0.873068 | -0.888841 | -2.719652 | H | -0.644045 | -0.111265 | -3.454943 |
| C | 2.332059  | -0.661773 | 3.197342  | H | -0.815296 | -0.360367 | 4.179043  |
| C | 4.315348  | -0.861884 | 1.288602  | H | -0.830639 | -2.093895 | 3.827230  |
| C | 2.707778  | 0.438155  | -3.399285 | H | -0.348845 | -0.961482 | 2.577403  |
| C | 3.886214  | 2.562734  | -0.469781 | H | -3.098372 | 1.135418  | 3.613752  |
| C | -3.381032 | 0.469321  | -2.970362 | H | -2.516463 | 1.121787  | 1.941048  |
| H | -2.105551 | -4.605859 | 3.760254  | H | -4.176646 | 0.642666  | 2.299002  |
| H | -2.036522 | -2.921633 | 4.280431  | H | -3.451431 | -1.063176 | 5.057732  |
| H | -3.574532 | -3.624801 | 3.755536  | H | -4.711110 | -1.488928 | 3.897812  |
| H | -2.223860 | -5.297135 | 1.011152  | H | -3.478008 | -2.678887 | 4.342774  |
| H | -3.823267 | -4.635702 | 1.363602  | H | 1.092693  | 3.709358  | -3.352329 |
| H | -2.937398 | -4.079354 | -0.055608 | H | 0.763586  | 2.013076  | -2.964452 |
| H | -0.036593 | -4.161891 | 1.843186  | H | -0.196066 | 2.835964  | -4.195016 |
| H | -0.055232 | -2.616055 | 0.968639  | H | -0.670996 | 5.691883  | -2.625673 |
| H | -0.023984 | -2.626048 | 2.718307  | H | -2.033700 | 4.890436  | -3.416900 |
| H | 5.151407  | -3.101031 | -2.326938 | H | -2.138277 | 5.337329  | -1.710241 |
| H | 4.572377  | -2.047573 | -3.625016 | H | 0.939902  | 4.280912  | -0.724388 |
| H | 4.634034  | -1.446032 | -1.954685 | H | -0.605396 | 4.261952  | 0.140747  |
| H | 3.413913  | -4.313567 | -0.601088 | H | 0.306116  | 2.765426  | -0.078372 |
| H | 2.859642  | -2.755831 | 0.035524  | H | -4.520124 | 4.761639  | -0.729257 |
| H | 1.684172  | -3.924459 | -0.570337 | H | -3.275290 | 4.954504  | -1.967614 |
| H | 3.236268  | -4.921403 | -3.280413 | H | -4.671920 | 3.916268  | -2.272420 |
| H | 1.509516  | -4.576663 | -3.162025 | H | -4.787741 | 2.155173  | 0.596809  |
| H | 2.481042  | -3.807305 | -4.423920 | H | -4.614483 | 1.135970  | -0.843185 |
| H | -1.074987 | -3.727801 | -1.718868 | H | -3.430291 | 1.031634  | 0.466818  |
| H | 0.634615  | -4.181106 | -1.744051 | H | -2.877823 | 4.058705  | 1.183972  |
| H | 0.077785  | -2.935114 | -0.624074 | H | -1.490475 | 3.016700  | 0.856167  |

|                 |           |           |           |    |           |           |           |
|-----------------|-----------|-----------|-----------|----|-----------|-----------|-----------|
| H               | -1.659309 | 4.562106  | 0.006425  | C  | 1.195798  | 0.039790  | 0.143770  |
| H               | 1.627967  | 4.673049  | 3.094963  | C  | 2.688109  | 0.118039  | 0.210073  |
| H               | 3.311471  | 4.429040  | 2.619211  | C  | 2.948971  | -0.223747 | 1.656095  |
| H               | 2.023751  | 4.318078  | 1.410379  | P  | -0.143594 | 0.219676  | -0.920489 |
| H               | -0.177742 | 2.694914  | 3.232280  | O  | -0.214254 | 0.569712  | -2.358618 |
| H               | 0.132372  | 2.232488  | 1.550287  | C  | -0.747879 | -0.403301 | 1.436242  |
| H               | 0.227893  | 1.022736  | 2.822731  | C  | -1.760364 | -0.712887 | 2.427259  |
| H               | 1.972923  | 2.796788  | 5.072521  | C  | -2.973284 | -0.645027 | 1.844391  |
| H               | 2.408282  | 1.125311  | 4.688210  | C  | -2.855263 | -0.276255 | 0.386345  |
| H               | 3.614652  | 2.409750  | 4.542833  | C  | -1.374106 | -0.142957 | 0.225496  |
| H               | 5.052107  | -0.335903 | 4.186065  | Si | 3.217027  | 1.479315  | -0.132231 |
| H               | 5.695647  | 0.950609  | 3.162680  | H  | 3.943130  | -0.266004 | 2.080685  |
| H               | 4.413012  | 1.305505  | 4.332196  | H  | 1.702939  | -0.724845 | 3.358782  |
| H               | 4.771371  | -1.730169 | 1.775979  | Si | -3.194888 | 1.471888  | 0.124332  |
| H               | 3.539266  | -1.224009 | 0.610051  | H  | -3.922640 | -0.825599 | 2.330732  |
| H               | 5.086279  | -0.362458 | 0.695941  | H  | -1.563790 | -0.957169 | 3.462657  |
| H               | 2.713748  | -1.543100 | 3.724219  | Si | -3.444676 | -1.338426 | -0.493646 |
| H               | 1.794532  | -0.043756 | 3.920952  | Si | 3.492660  | -1.410733 | -0.295452 |
| H               | 1.628907  | -1.001050 | 2.432671  | C  | -3.066413 | 1.792913  | -1.335269 |
| H               | -4.556332 | -3.007933 | 1.915635  | C  | -4.587802 | 1.785071  | 0.584448  |
| H               | -4.034389 | -2.872735 | -1.536835 | C  | -2.213468 | 2.294466  | 0.905474  |
| H               | -3.954774 | 0.201592  | -3.832940 | C  | -3.305798 | -0.931108 | -1.930589 |
| H               | 1.667016  | -1.265391 | -4.933054 | C  | -2.720681 | -2.632718 | -0.268614 |
| H               | 3.229715  | 0.895727  | -4.213601 | C  | -4.896963 | -1.513623 | -0.161728 |
| H               | 4.149369  | 3.059461  | -1.380227 | C  | 4.980736  | -1.247838 | -0.200096 |
| H               | 4.563760  | 2.957631  | 2.147393  | C  | 3.053333  | -2.528011 | 0.603815  |
|                 |           |           |           | C  | 3.114369  | -1.730326 | -1.711346 |
| <b>33B</b>      |           |           |           | C  | 4.714285  | 1.471217  | -0.041951 |
| 68              |           |           |           | C  | 2.802209  | 1.840532  | -1.527741 |
| E= -2437.099312 |           |           |           | C  | 2.663503  | 2.487473  | 0.830696  |
| C               | 1.797146  | -0.459923 | 2.314126  | H  | -3.141130 | -3.390400 | -0.896341 |
| C               | 0.690472  | -0.301074 | 1.390481  | H  | -1.684717 | -2.507744 | -0.505383 |

|   |           |           |           |                 |           |           |           |
|---|-----------|-----------|-----------|-----------------|-----------|-----------|-----------|
| H | -2.819748 | -2.923271 | 0.756405  | H               | 5.294123  | -0.450847 | -0.841573 |
| H | -5.317411 | -2.271304 | -0.789455 | H               | 5.250584  | -1.019862 | 0.809909  |
| H | -4.996030 | -1.804176 | 0.863291  |                 |           |           |           |
| H | -5.413413 | -0.590361 | -0.322251 | <b>33BH</b>     |           |           |           |
| H | -3.726246 | -1.688789 | -2.558317 | 69              |           |           |           |
| H | -3.822248 | -0.007846 | -2.091112 | E: -2437.735250 |           |           |           |
| H | -2.269834 | -0.806134 | -2.167358 | C               | 1.288940  | 0.184809  | 0.374944  |
| H | -3.268301 | 2.832087  | -1.491022 | C               | 0.722986  | 0.190278  | 1.619814  |
| H | -2.072801 | 1.569509  | -1.663485 | C               | 1.760502  | 0.119839  | 2.609369  |
| H | -3.766493 | 1.206141  | -1.892484 | C               | 2.951012  | 0.045926  | 1.954455  |
| H | -4.789690 | 2.824245  | 0.428696  | C               | 2.758902  | 0.061980  | 0.481216  |
| H | -5.287881 | 1.198299  | 0.027234  | C               | -0.746328 | 0.166901  | 1.609794  |
| H | -4.679447 | 1.556073  | 1.625631  | C               | -1.794133 | 0.196529  | 2.589562  |
| H | -2.415356 | 3.333639  | 0.749721  | C               | -2.981473 | 0.140168  | 1.927758  |
| H | -2.305113 | 2.065468  | 1.946656  | C               | -2.777110 | 0.068343  | 0.457134  |
| H | -1.219856 | 2.071062  | 0.577258  | C               | -1.299777 | 0.089980  | 0.360392  |
| H | 3.040797  | 3.458517  | 0.586519  | P               | 0.003320  | 0.160776  | -0.885359 |
| H | 1.595458  | 2.493250  | 0.766297  | O               | 0.076696  | -0.845274 | -1.989825 |
| H | 2.959406  | 2.229806  | 1.826160  | Si              | -3.417139 | -1.641795 | -0.167734 |
| H | 5.091580  | 2.442261  | -0.286128 | C               | -2.479028 | -2.952816 | 0.790136  |
| H | 5.010188  | 1.213549  | 0.953513  | Si              | -3.493812 | 1.656728  | -0.339666 |
| H | 5.109132  | 0.752064  | -0.728839 | C               | -3.379875 | 1.576691  | -2.211771 |
| H | 3.179504  | 2.811576  | -1.771918 | Si              | 3.294350  | -1.670709 | -0.196092 |
| H | 3.197057  | 1.121379  | -2.214629 | C               | 1.984702  | -2.899536 | 0.336517  |
| H | 1.734165  | 1.846308  | -1.592141 | Si              | 3.618651  | 1.585497  | -0.295045 |
| H | 3.531593  | -3.436781 | 0.303309  | C               | 5.477444  | 1.326360  | -0.360492 |
| H | 3.323180  | -2.300035 | 1.613820  | C               | -5.259094 | -1.786543 | 0.184238  |
| H | 1.991838  | -2.644209 | 0.535794  | C               | -3.110446 | -1.879795 | -1.996740 |
| H | 3.592629  | -2.639095 | -2.011853 | C               | 3.414858  | -1.656270 | -2.063741 |
| H | 2.052874  | -1.846524 | -1.779367 | C               | 4.953555  | -2.139162 | 0.553977  |
| H | 3.427755  | -0.933334 | -2.352824 | C               | 2.953929  | 1.899830  | -2.023382 |
| H | 5.458997  | -2.156608 | -0.500603 | C               | 3.220923  | 3.065817  | 0.786241  |

|   |           |           |           |        |              |           |           |
|---|-----------|-----------|-----------|--------|--------------|-----------|-----------|
| C | -5.282016 | 1.898690  | 0.177764  | H      | -2.062667    | -1.698568 | -2.255320 |
| C | -2.471907 | 3.100571  | 0.290194  | H      | -2.968598    | 4.048654  | 0.062066  |
| H | -3.960111 | 0.132678  | 2.391662  | H      | -2.336205    | 3.040023  | 1.373514  |
| H | -1.661306 | 0.249775  | 3.661748  | H      | -1.480093    | 3.124358  | -0.169003 |
| H | 3.924459  | -0.018916 | 2.425110  | H      | -3.448938    | 2.586967  | -2.627123 |
| H | 1.619322  | 0.117701  | 3.681736  | H      | -2.441432    | 1.135831  | -2.559911 |
| H | 3.501312  | 3.998397  | 0.287052  | H      | -4.196285    | 0.988169  | -2.637804 |
| H | 2.147848  | 3.103786  | 0.997442  | H      | -5.684760    | 2.799668  | -0.295679 |
| H | 3.746521  | 3.020637  | 1.743264  | H      | -5.917384    | 1.059111  | -0.112541 |
| H | 5.967748  | 2.248069  | -0.688877 | H      | -5.366415    | 2.028206  | 1.260295  |
| H | 5.884007  | 1.066797  | 0.621229  | H      | -0.073635    | 1.493196  | -1.364548 |
| H | 5.754814  | 0.535287  | -1.062643 |        |              |           |           |
| H | 3.660149  | 2.519735  | -2.584587 | {33B}2 |              |           |           |
| H | 2.788436  | 0.983437  | -2.593496 | 136    |              |           |           |
| H | 2.006994  | 2.444910  | -1.981864 | E=     | -4874.297091 |           |           |
| H | 3.685697  | -2.659038 | -2.410256 | P      | 1.649696     | 0.315985  | -0.264176 |
| H | 2.444032  | -1.403220 | -2.500479 | C      | 2.600404     | -1.198520 | -0.653266 |
| H | 4.172415  | -0.961779 | -2.437392 | C      | 3.636326     | -1.307004 | 0.245012  |
| H | 5.297104  | -3.081852 | 0.116227  | C      | 4.688139     | -2.109333 | -0.308102 |
| H | 5.726785  | -1.389505 | 0.371021  | C      | 4.315603     | -2.471206 | -1.562322 |
| H | 4.870563  | -2.287471 | 1.634172  | C      | 2.958373     | -1.956637 | -1.893141 |
| H | 2.359616  | -3.924159 | 0.252567  | C      | 2.503986     | 0.458121  | 1.338237  |
| H | 1.679457  | -2.732697 | 1.373530  | C      | 3.518868     | -0.456032 | 1.422064  |
| H | 1.104246  | -2.804137 | -0.304690 | O      | 0.110326     | -0.127408 | 0.258303  |
| H | -2.845022 | -3.948611 | 0.521614  | P      | -1.373196    | -0.105434 | -0.387198 |
| H | -1.412056 | -2.913052 | 0.555624  | C      | -2.124517    | 1.531858  | -0.284230 |
| H | -2.592734 | -2.828119 | 1.869775  | C      | -2.584692    | 2.614417  | -1.205866 |
| H | -5.578985 | -2.821100 | 0.024398  | C      | -3.558914    | 3.338036  | -0.349597 |
| H | -5.510943 | -1.518120 | 1.213736  | Si     | 3.027169     | -0.801956 | -3.420749 |
| H | -5.850417 | -1.157306 | -0.486325 | C      | 4.024244     | -1.584685 | -4.809443 |
| H | -3.345788 | -2.918012 | -2.254873 | Si     | 1.928950     | -3.585353 | -2.088133 |
| H | -3.739231 | -1.236796 | -2.616152 | C      | 2.424562     | -4.474471 | -3.671305 |

|    |           |           |           |   |           |           |           |
|----|-----------|-----------|-----------|---|-----------|-----------|-----------|
| C  | 2.620529  | 1.424629  | 2.467006  | C | -3.575640 | -3.336265 | -0.704509 |
| Si | 3.472656  | 2.984963  | 1.671341  | C | -1.136693 | -4.789524 | 1.128593  |
| C  | 4.029005  | 4.190642  | 3.003763  | C | 0.685597  | -2.638908 | 1.949004  |
| C  | 3.731322  | 0.827885  | 3.262214  | C | -2.592670 | 1.226223  | -4.042637 |
| Si | 1.082715  | 1.779965  | 3.547800  | C | -4.671964 | 0.428075  | -1.913069 |
| C  | 1.631877  | 2.577674  | 5.161063  | C | -3.323826 | -0.045220 | 2.963780  |
| H  | 4.076613  | 1.241844  | 4.201170  | C | -3.714470 | 2.728950  | 0.855899  |
| C  | -0.130012 | 2.897535  | 2.662364  | C | 4.263628  | -0.250426 | 2.629349  |
| C  | 0.190026  | 0.192662  | 3.970877  | H | 2.019449  | -5.491277 | -3.640948 |
| O  | -1.450049 | -0.747319 | -1.725726 | H | 2.011650  | -3.986115 | -4.558038 |
| C  | -2.251156 | -0.725936 | 1.062131  | H | 3.507654  | -4.553737 | -3.796606 |
| C  | -2.432051 | -1.940780 | 1.889366  | H | 1.548929  | -5.441015 | -0.490911 |
| Si | -1.052872 | -3.257773 | 2.222925  | H | 3.283184  | -5.232527 | -0.793403 |
| C  | -1.274037 | -3.805251 | 4.006968  | H | 2.438141  | -4.126783 | 0.291816  |
| C  | 4.962900  | 2.442410  | 0.668348  | H | -0.407837 | -4.267676 | -2.292225 |
| C  | 2.316458  | 3.910598  | 0.521470  | H | -0.280860 | -2.874946 | -1.208244 |
| C  | 1.289093  | -0.425728 | -4.017061 | H | -0.231826 | -2.623418 | -2.928967 |
| C  | 3.932354  | 0.766270  | -2.915658 | H | -6.181215 | -1.969057 | 0.271818  |
| C  | 2.342274  | -4.700359 | -0.632324 | H | -5.937363 | -1.537920 | 1.972176  |
| C  | 0.088761  | -3.302736 | -2.139587 | H | -5.160691 | -0.594963 | 0.695020  |
| C  | -2.818218 | 0.354951  | 1.687828  | H | -4.500243 | -3.395319 | -1.287712 |
| C  | -2.856847 | 1.580697  | 0.872387  | H | -2.909481 | -2.631459 | -1.211354 |
| Si | -1.262023 | 3.840392  | -1.863371 | H | -3.106441 | -4.321059 | -0.728985 |
| C  | -1.962247 | 4.951902  | -3.210869 | H | -5.399612 | -4.739420 | 1.598162  |
| Si | -3.663897 | 1.830562  | -2.631875 | H | -3.799777 | -4.991548 | 2.295360  |
| C  | -4.898147 | 3.097417  | -3.277603 | H | -4.936027 | -3.877986 | 3.064874  |
| C  | -0.797272 | 4.970897  | -0.441708 | H | -0.303424 | -5.430661 | 1.437173  |
| C  | 0.205570  | 2.929253  | -2.578729 | H | -2.050848 | -5.378363 | 1.208087  |
| C  | -3.078756 | -1.377588 | 3.104624  | H | -0.976726 | -4.542640 | 0.077870  |
| Si | -3.997095 | -2.789700 | 1.039968  | H | -0.557443 | -4.598878 | 4.239632  |
| C  | -4.565210 | -4.239404 | 2.101148  | H | -1.094889 | -2.975203 | 4.696079  |
| C  | -5.448999 | -1.600868 | 0.997609  | H | -2.277181 | -4.197374 | 4.198681  |

|   |           |           |           |                 |           |           |           |
|---|-----------|-----------|-----------|-----------------|-----------|-----------|-----------|
| H | 1.370439  | -3.419350 | 2.299589  | H               | -0.648044 | 4.414804  | 0.483969  |
| H | 0.878590  | -2.487577 | 0.886701  | H               | 0.975549  | 3.649964  | -2.873569 |
| H | 0.939003  | -1.713275 | 2.455720  | H               | 0.661889  | 2.231454  | -1.874035 |
| H | 1.297311  | 0.451752  | -4.671244 | H               | -0.078543 | 2.358236  | -3.465407 |
| H | 0.882872  | -1.264475 | -4.590636 | H               | -1.199687 | 5.695980  | -3.464578 |
| H | 0.593757  | -0.228418 | -3.195990 | H               | -2.211951 | 4.412540  | -4.127501 |
| H | 4.311449  | 1.285987  | -3.801034 | H               | -2.850055 | 5.496990  | -2.878505 |
| H | 3.284418  | 1.456236  | -2.370356 | H               | -5.445154 | 2.648285  | -4.113507 |
| H | 4.787653  | 0.520939  | -2.277725 | H               | -5.630993 | 3.355685  | -2.508154 |
| H | 4.085012  | -0.876859 | -5.642702 | H               | -4.443526 | 4.019376  | -3.641552 |
| H | 5.047310  | -1.798315 | -4.486628 | H               | -5.429006 | 0.114338  | -2.638887 |
| H | 3.587406  | -2.508181 | -5.191659 | H               | -4.054616 | -0.438618 | -1.672471 |
| H | -0.565733 | 0.394935  | 4.736461  | H               | -5.194050 | 0.757248  | -1.011177 |
| H | -0.329465 | -0.193695 | 3.092396  | H               | -3.225869 | 0.691370  | -4.758273 |
| H | 0.867133  | -0.574911 | 4.354364  | H               | -2.104843 | 2.043441  | -4.580299 |
| H | 0.745939  | 2.843036  | 5.747051  | H               | -1.837985 | 0.527981  | -3.674363 |
| H | 2.223639  | 1.881228  | 5.762118  | H               | 4.885871  | -3.109778 | -2.226633 |
| H | 2.220172  | 3.486306  | 5.020902  | H               | 5.615342  | -2.368159 | 0.185382  |
| H | -1.098752 | 2.866220  | 3.170848  | H               | 5.107662  | -0.837432 | 2.966009  |
| H | 0.199801  | 3.938626  | 2.634611  | H               | -3.374206 | -1.981185 | 3.952778  |
| H | -0.297894 | 2.556184  | 1.637952  | H               | -3.834619 | 0.588323  | 3.675966  |
| H | 4.658180  | 4.959873  | 2.544251  | H               | -4.386674 | 3.032787  | 1.646843  |
| H | 3.182258  | 4.701000  | 3.469879  | H               | -4.072445 | 4.236986  | -0.668834 |
| H | 4.614867  | 3.708660  | 3.790351  |                 |           |           |           |
| H | 5.490482  | 3.336700  | 0.320496  | <b>33C</b>      |           |           |           |
| H | 5.663767  | 1.838840  | 1.247448  | 68              |           |           |           |
| H | 4.665802  | 1.868744  | -0.212574 | E= -5003.921779 |           |           |           |
| H | 2.915399  | 4.510391  | -0.171779 | C               | -1.299119 | -0.110616 | 0.483373  |
| H | 1.693753  | 3.245137  | -0.079083 | C               | -0.720872 | -0.091366 | 1.741105  |
| H | 1.659830  | 4.590680  | 1.064848  | C               | -1.772199 | -0.032477 | 2.735820  |
| H | 0.118768  | 5.526206  | -0.661103 | C               | -2.955790 | -0.001908 | 2.099774  |
| H | -1.600437 | 5.693061  | -0.268351 | C               | -2.810180 | -0.028570 | 0.580838  |

|   |           |           |           |   |           |           |           |
|---|-----------|-----------|-----------|---|-----------|-----------|-----------|
| C | 0.720871  | -0.091334 | 1.741091  | F | -5.394210 | -0.673079 | -0.752666 |
| C | 1.772198  | -0.032247 | 2.735812  | F | -3.510516 | -2.652679 | -1.711980 |
| C | 2.955772  | -0.001582 | 2.099745  | F | -3.153889 | -0.982466 | -2.132461 |
| C | 2.810170  | -0.028412 | 0.580831  | F | -1.914073 | -1.990612 | -1.398596 |
| C | 1.299092  | -0.110593 | 0.483370  | F | -3.565414 | 2.451086  | -1.841962 |
| P | -0.000031 | -0.107024 | -0.644278 | F | -2.441416 | 1.099916  | -1.981416 |
| O | 0.000034  | -0.077284 | -2.130541 | F | -4.191150 | 0.809382  | -1.919681 |
| C | 3.317263  | 1.383704  | 0.010630  | F | -4.999249 | 2.731497  | 0.095561  |
| C | 2.343205  | 2.499424  | 0.446376  | F | -5.479292 | 1.065865  | 0.375841  |
| C | 3.464657  | -1.379122 | 0.024919  | F | -4.652165 | 1.975664  | 1.645518  |
| C | 2.979399  | -1.753206 | -1.386657 | F | -2.790656 | 3.470348  | 0.215782  |
| C | -3.317352 | 1.383661  | 0.010828  | F | -2.143005 | 2.471240  | 1.520113  |
| C | -2.343521 | 2.499413  | 0.446951  | F | -1.389862 | 2.445654  | -0.080429 |
| C | -3.464584 | -1.379179 | 0.024742  | F | 2.790715  | 3.470403  | 0.216098  |
| C | -4.999319 | -1.345243 | 0.010932  | F | 1.390078  | 2.446090  | -0.082025 |
| C | 4.694540  | 1.793772  | 0.568881  | F | 2.141627  | 2.470807  | 1.519323  |
| C | 3.379778  | 1.421053  | -1.522071 | F | 4.999240  | 2.731479  | 0.095092  |
| C | -3.379611 | 1.421244  | -1.521881 | F | 4.651641  | 1.976512  | 1.645379  |
| C | -4.694753 | 1.793501  | 0.568911  | F | 5.479072  | 1.065962  | 0.376432  |
| C | -2.979040 | -1.753170 | -1.386779 | F | 3.565268  | 2.450918  | -1.842270 |
| C | -3.048710 | -2.549035 | 0.941125  | F | 4.191625  | 0.809432  | -1.919619 |
| C | 4.999400  | -1.345179 | 0.011407  | F | 2.441778  | 1.099324  | -1.981720 |
| C | 3.048633  | -2.548921 | 0.941316  | F | 3.356317  | -3.492041 | 0.480906  |
| H | 3.921176  | 0.019467  | 2.587423  | F | 3.518456  | -2.489969 | 1.925071  |
| H | 1.621441  | -0.024177 | 3.807253  | F | 1.965543  | -2.582393 | 1.081196  |
| H | -3.921196 | 0.018971  | 2.587449  | F | 3.510547  | -2.653055 | -1.711454 |
| H | -1.621442 | -0.024466 | 3.807262  | F | 1.914320  | -1.990118 | -1.398811 |
| F | -3.356004 | -3.492154 | 0.480443  | F | 3.154919  | -0.982780 | -2.132471 |
| F | -1.965674 | -2.582308 | 1.081451  | F | 5.372594  | -2.347987 | -0.216545 |
| F | -3.518972 | -2.490334 | 1.924688  | F | 5.394455  | -0.672961 | -0.752050 |
| F | -5.372464 | -2.348069 | -0.217014 | F | 5.415036  | -1.056396 | 0.980250  |
| F | -5.415148 | -1.056384 | 0.979667  |   |           |           |           |



**33CH**

69

E: -5004.545322

|   |           |           |           |   |           |           |           |
|---|-----------|-----------|-----------|---|-----------|-----------|-----------|
| C | 1.316769  | 0.081633  | -0.299427 | F | 1.379395  | -2.484636 | 0.815699  |
| C | 0.727733  | 0.005567  | -1.508708 | C | 3.396734  | 1.854091  | 1.501309  |
| C | 1.702098  | -0.104392 | -2.580578 | F | 4.368215  | 1.308112  | 2.218927  |
| C | 2.916099  | -0.068479 | -2.040371 | C | 5.044389  | 1.661327  | -0.398675 |
| C | 2.846027  | 0.019309  | -0.503626 | F | 5.217456  | 1.621123  | -1.724773 |
| C | -0.727751 | 0.005555  | -1.508705 | F | 3.481397  | 3.171578  | 1.686523  |
| C | -1.316806 | 0.081587  | -0.299426 | F | 2.231776  | 1.479450  | 2.016437  |
| C | -2.846050 | 0.019281  | -0.503633 | C | -2.265495 | -2.595808 | -0.159814 |
| C | -2.916100 | -0.068473 | -2.040369 | F | -1.379284 | -2.484418 | 0.815830  |
| C | -1.702101 | -0.104436 | -2.580579 | C | -3.844451 | -1.569503 | 1.490504  |
| P | -0.000023 | 0.290406  | 0.978042  | F | -5.070815 | -1.085243 | 1.662719  |
| O | -0.000032 | -0.493506 | 2.228102  | F | -2.812231 | -3.810459 | -0.072934 |
| C | -3.406211 | -1.479768 | -0.018352 | F | -1.611295 | -2.573427 | -1.316960 |
| C | -4.592103 | -2.038598 | -0.912570 | C | -5.044324 | 1.661395  | -0.398912 |
| F | -4.119648 | -2.612519 | -2.024866 | F | -5.814430 | 0.743271  | 0.154832  |
| C | -3.519740 | 1.479299  | -0.037714 | C | -3.396834 | 1.854172  | 1.501241  |
| C | -2.752233 | 2.670924  | -0.798452 | F | -2.231834 | 1.479669  | 2.016407  |
| F | -2.610869 | 2.471970  | -2.103076 | F | -5.509271 | 2.835904  | 0.024996  |
| C | 3.406213  | -1.479692 | -0.018387 | F | -5.217317 | 1.621015  | -1.725003 |
| C | 3.844327  | -1.569557 | 1.490509  | F | 5.293509  | -2.957205 | -0.257549 |
| F | 2.998069  | -0.889951 | 2.248726  | F | 4.119587  | -2.612295 | -2.024978 |
| C | 3.519751  | 1.479275  | -0.037660 | F | 3.860053  | -2.819932 | 1.944939  |
| C | 2.752346  | 2.670961  | -0.798442 | F | 5.070590  | -1.085150 | 1.662990  |
| F | 1.534372  | 2.849199  | -0.278592 | F | -3.860123 | -2.819810 | 1.945131  |
| C | 2.265612  | -2.595832 | -0.159962 | F | -2.998419 | -0.889686 | 2.248761  |
| F | 1.611425  | -2.573432 | -1.317113 | F | -5.293429 | -2.957348 | -0.257336 |
| C | 4.592104  | -2.038443 | -0.912681 | F | -5.448861 | -1.104308 | -1.312151 |
| F | 5.448786  | -1.104112 | -1.312333 | F | -3.481634 | 3.171652  | 1.686411  |
| F | 2.812491  | -3.810420 | -0.073150 | F | -4.368270 | 1.308137  | 2.218864  |
|   |           |           |           | F | -3.392974 | 3.828702  | -0.683492 |
|   |           |           |           | F | -1.534329 | 2.849233  | -0.278455 |
|   |           |           |           | F | 5.509387  | 2.835727  | 0.025429  |

|                           |           |           |           |   |           |           |           |
|---------------------------|-----------|-----------|-----------|---|-----------|-----------|-----------|
| F                         | 5.814414  | 0.743087  | 0.155008  | C | -2.345007 | -2.080182 | -1.746702 |
| F                         | 3.393064  | 3.828746  | -0.683311 | C | 4.456901  | -0.917669 | 1.145565  |
| F                         | 2.611128  | 2.472104  | -2.103092 | C | 4.307791  | 0.541637  | 0.718485  |
| H                         | 3.848733  | -0.100067 | -2.574721 | C | 2.723241  | -0.514289 | 3.257865  |
| H                         | 1.478720  | -0.188115 | -3.634057 | C | 1.776805  | -1.375012 | 4.120956  |
| H                         | -3.848735 | -0.099974 | -2.574720 | C | -2.832525 | -0.558656 | 2.888521  |
| H                         | -1.478711 | -0.188151 | -3.634056 | C | -1.379566 | -0.516688 | 3.386210  |
| H                         | -0.000127 | 1.680939  | 1.127836  | C | -4.513035 | 0.934820  | 1.278179  |
| <b>{33C}</b> <sub>2</sub> |           |           |           | C | -4.445410 | 0.160856  | -0.046775 |
| 136                       |           |           |           | C | -0.528971 | 3.247737  | 1.134627  |
| E= -10007.8602808         |           |           |           | C | -0.110039 | 2.670556  | -0.013029 |
| C                         | 2.913069  | -3.773088 | 1.991279  | C | 0.508185  | 3.755996  | -0.917150 |
| C                         | 1.967603  | -3.164174 | 1.066221  | C | 0.509414  | 4.926843  | 0.052501  |
| C                         | 2.037664  | -1.811517 | 1.117965  | C | -0.098206 | 4.635737  | 1.207817  |
| C                         | 3.209194  | -1.416293 | 2.037732  | C | 2.007432  | 3.425275  | -1.322778 |
| C                         | 3.603131  | -2.786086 | 2.571163  | C | 2.147124  | 2.023609  | -1.927517 |
| P                         | 1.127768  | -1.147707 | -0.327609 | C | -0.536148 | 4.157082  | -2.091944 |
| O                         | -0.082322 | -0.186443 | 0.368995  | C | -1.987347 | 4.119353  | -1.569584 |
| P                         | -0.973547 | 1.071322  | -0.146495 | O | -1.583254 | 0.825862  | -1.477920 |
| C                         | -1.988263 | 1.363151  | 1.341025  | C | 0.384900  | -4.081266 | -4.426997 |
| C                         | -3.171741 | 0.824487  | 2.157530  | C | 0.038309  | -1.692366 | -3.794447 |
| C                         | -3.240548 | 1.893075  | 3.240073  | C | -2.477385 | -4.178838 | -3.050436 |
| C                         | -2.300584 | 2.833344  | 3.094249  | C | -2.237368 | -4.249244 | -0.589798 |
| C                         | -1.536426 | 2.505531  | 1.900515  | C | 5.809844  | -1.082300 | 1.868414  |
| C                         | 1.114052  | -3.704777 | 0.025272  | C | 4.578468  | -1.751079 | -0.147219 |
| C                         | 0.430012  | -2.795509 | -0.716998 | C | 3.853860  | -0.045327 | 4.185999  |
| C                         | -0.187456 | -3.518875 | -1.931734 | C | 1.944357  | 0.735226  | 2.815828  |
| C                         | 0.245191  | -4.947983 | -1.643146 | C | -3.699655 | -0.815430 | 4.138513  |
| C                         | 0.977508  | -5.043451 | -0.528841 | C | -2.939541 | -1.776933 | 1.967375  |
| C                         | 0.537508  | -3.052363 | -3.287208 | C | 2.641429  | 4.430661  | -2.295865 |
| C                         | 2.060861  | -2.929213 | -3.062019 | C | 2.862751  | 3.466634  | -0.041222 |
| C                         | -1.786016 | -3.496246 | -1.861090 | C | -0.318971 | 5.603588  | -2.587851 |

|   |           |           |           |   |           |           |           |
|---|-----------|-----------|-----------|---|-----------|-----------|-----------|
| C | -0.471050 | 3.217950  | -3.304904 | F | -0.956753 | -1.760709 | -4.237483 |
| C | -5.758328 | 0.447143  | 2.034672  | F | 0.007896  | -0.932257 | -3.009837 |
| C | -4.765055 | 2.412866  | 0.909769  | F | 2.557098  | -2.869248 | -4.034936 |
| H | 4.357717  | -2.913182 | 3.335635  | F | 2.323436  | -2.025424 | -2.513048 |
| F | -3.544650 | -4.266103 | -2.825156 | F | 2.469337  | -3.793305 | -2.533124 |
| F | -2.391844 | -3.594311 | -3.967982 | F | 0.840849  | -3.666292 | -5.330809 |
| F | -2.102442 | -5.188001 | -3.239482 | F | 0.912131  | -5.010652 | -4.197551 |
| F | -3.303671 | -4.068000 | -0.426651 | F | -0.646070 | -4.323205 | -4.669493 |
| F | -2.093057 | -5.328160 | -0.674496 | F | 1.243095  | -0.738345 | 4.831673  |
| F | -1.702562 | -3.900130 | 0.295401  | F | 1.035127  | -1.890255 | 3.510107  |
| F | -3.431045 | -2.130956 | -1.628193 | F | 2.326579  | -2.125091 | 4.693503  |
| F | -1.942465 | -1.572159 | -0.875776 | F | 3.405765  | 0.425719  | 5.066355  |
| F | -2.141427 | -1.444919 | -2.602112 | F | 4.473421  | -0.872286 | 4.542475  |
| F | -5.608330 | 2.465735  | 0.215951  | F | 4.499879  | 0.699027  | 3.717186  |
| F | -5.014989 | 3.020037  | 1.781797  | F | 1.500061  | 1.209099  | 3.696681  |
| F | -3.903477 | 2.863164  | 0.413846  | F | 2.582243  | 1.478346  | 2.342419  |
| F | -5.378993 | 0.330020  | -0.592924 | F | 1.132021  | 0.496960  | 2.133862  |
| F | -3.629310 | 0.489252  | -0.690402 | F | 6.589174  | -0.615620 | 1.258378  |
| F | -4.350888 | -0.911941 | 0.096693  | F | 5.844464  | -0.614997 | 2.849298  |
| F | -6.644083 | 0.696424  | 1.442966  | F | 6.074856  | -2.136217 | 1.980468  |
| F | -5.759425 | -0.635338 | 2.172555  | F | 5.540062  | -1.525999 | -0.617755 |
| F | -5.874903 | 0.925152  | 3.010578  | F | 4.548754  | -2.824419 | 0.048956  |
| F | -2.499011 | -2.641925 | 2.472831  | F | 3.800358  | -1.507263 | -0.870641 |
| F | -3.971249 | -2.035187 | 1.723073  | F | 5.057074  | 0.774356  | -0.045030 |
| F | -2.384319 | -1.629031 | 1.042177  | F | 3.328660  | 0.730892  | 0.280140  |
| F | -3.466403 | -1.814441 | 4.518442  | F | 4.457467  | 1.238751  | 1.544212  |
| F | -3.469134 | -0.107828 | 4.938483  | F | 3.858601  | 3.068192  | -0.248657 |
| F | -4.770220 | -0.783492 | 3.951078  | F | 2.985501  | 4.486013  | 0.330346  |
| F | -1.209730 | -1.362401 | 4.057928  | F | 2.415104  | 2.867799  | 0.753796  |
| F | -0.677202 | -0.601772 | 2.559839  | F | 3.203521  | 1.812089  | -2.120012 |
| F | -1.156887 | 0.397301  | 3.942177  | F | 1.791884  | 1.254386  | -1.243708 |
| F | 0.718038  | -1.334780 | -4.574331 | F | 1.609552  | 1.902727  | -2.865131 |

|   |           |           |           |    |           |           |           |
|---|-----------|-----------|-----------|----|-----------|-----------|-----------|
| F | 3.701959  | 4.183578  | -2.403825 | C  | 1.291999  | 0.006827  | -0.634178 |
| F | 2.198606  | 4.394602  | -3.291659 | P  | -0.007897 | 0.233063  | 0.550163  |
| F | 2.586739  | 5.457640  | -1.925665 | O  | -0.041939 | -0.340583 | 1.937784  |
| F | -0.963233 | 5.770133  | -3.455924 | Si | 3.457578  | -1.625111 | -0.034660 |
| F | -0.607139 | 6.333717  | -1.827601 | C  | 2.656768  | -3.003862 | -1.023634 |
| F | 0.700808  | 5.817474  | -2.898509 | Si | 3.450923  | 1.670562  | -0.000403 |
| F | -2.633824 | 4.601442  | -2.308707 | C  | 3.394451  | 1.625825  | 1.873367  |
| F | -2.349052 | 3.099854  | -1.443759 | Si | -3.380508 | -1.665853 | -0.012367 |
| F | -2.101931 | 4.665799  | -0.630654 | C  | -2.177757 | -2.978936 | -0.602212 |
| F | -1.291332 | 3.475731  | -3.982230 | Si | -3.532052 | 1.624602  | -0.029116 |
| F | 0.456515  | 3.330873  | -3.868625 | C  | -5.394931 | 1.618325  | -0.271748 |
| F | -0.606456 | 2.175472  | -3.016793 | C  | 5.323590  | -1.686783 | -0.258871 |
| H | -0.066742 | -5.781219 | -2.258569 | C  | 3.040306  | -1.836876 | 1.777758  |
| H | 1.392487  | -5.946862 | -0.101423 | C  | -3.383975 | -1.620737 | 1.858880  |
| H | 3.017819  | -4.833749 | 2.178236  | C  | -5.101528 | -2.051467 | -0.661160 |
| H | -3.991205 | 1.878284  | 4.018013  | C  | -3.150727 | 1.813891  | 1.798534  |
| H | -2.146155 | 3.699479  | 3.723756  | C  | -2.767164 | 3.052161  | -0.975972 |
| H | -0.254962 | 5.301328  | 2.046037  | C  | 5.211961  | 1.954552  | -0.587125 |
| H | 0.958352  | 5.878909  | -0.196101 | C  | 2.359714  | 3.058213  | -0.637320 |

### 33D

68

E= -6009.660585

|   |           |           |           |   |           |           |           |
|---|-----------|-----------|-----------|---|-----------|-----------|-----------|
| C | -1.300515 | 0.050609  | -0.643771 | H | 3.944616  | 0.044938  | -2.674897 |
| C | -0.731923 | 0.043416  | -1.899575 | H | 1.644607  | 0.063263  | -3.943025 |
| C | -1.779617 | 0.001578  | -2.877756 | H | -3.946195 | -0.063456 | -2.686029 |
| C | -2.970347 | -0.019474 | -2.218326 | H | -1.644963 | -0.020967 | -3.950868 |
| C | -2.777480 | 0.012746  | -0.742419 | F | -3.141970 | 4.007394  | -0.595957 |
| C | 0.727659  | 0.035048  | -1.893753 | F | -1.678599 | 3.051425  | -0.870784 |
| C | 1.777542  | 0.056597  | -2.869497 | F | -2.998281 | 2.995253  | -2.042491 |
| C | 2.967153  | 0.052902  | -2.208335 | F | -5.804935 | 2.602835  | -0.026065 |
| C | 2.771209  | 0.033149  | -0.733179 | F | -5.674290 | 1.390832  | -1.304215 |
|   |           |           |           | F | -5.881821 | 0.888783  | 0.381230  |
|   |           |           |           | F | -3.275426 | 2.863716  | 2.082664  |
|   |           |           |           | F | -3.826873 | 1.221010  | 2.417846  |
|   |           |           |           | F | -2.130670 | 1.519522  | 2.058339  |

|                 |           |           |           |    |           |           |           |
|-----------------|-----------|-----------|-----------|----|-----------|-----------|-----------|
| F               | -3.519065 | -2.637630 | 2.241592  | C  | 0.742682  | 0.048112  | -1.678858 |
| F               | -2.435424 | -1.239360 | 2.248829  | C  | 1.760631  | 0.038655  | -2.689885 |
| F               | -4.197170 | -1.008553 | 2.256870  | C  | 2.965856  | 0.020134  | -2.077725 |
| F               | -5.476507 | -2.967484 | -0.193907 | C  | 2.792592  | 0.009886  | -0.574811 |
| F               | -5.817842 | -1.254226 | -0.448718 | C  | -0.720157 | 0.035421  | -1.679698 |
| F               | -5.087097 | -2.213878 | -1.742558 | C  | -1.282055 | 0.003894  | -0.438306 |
| F               | -2.591345 | -3.979616 | -0.443829 | C  | -2.776099 | -0.004674 | -0.589060 |
| F               | -1.958535 | -2.865611 | -1.667625 | C  | -2.940847 | 0.024388  | -2.091283 |
| F               | -1.234216 | -2.913450 | -0.053866 | C  | -1.732655 | 0.051646  | -2.696216 |
| F               | 2.962474  | -3.978191 | -0.630313 | P  | 0.010643  | 0.017697  | 0.853871  |
| F               | 1.566694  | -2.943054 | -0.963558 | O  | 0.042374  | -1.042250 | 1.883564  |
| F               | 2.936605  | -2.960224 | -2.078990 | Si | -3.484831 | -1.671772 | -0.021444 |
| F               | 5.683824  | -2.701690 | -0.063537 | C  | -5.120269 | -2.058839 | -0.995699 |
| F               | 5.628585  | -1.416887 | -1.273796 | F  | -4.825977 | -2.529864 | -2.223216 |
| F               | 5.835838  | -1.019213 | 0.439442  | Si | -3.408400 | 1.678330  | -0.002022 |
| F               | 3.252975  | -2.870900 | 2.069243  | C  | -2.622122 | 3.095890  | -1.074820 |
| F               | 3.638189  | -1.185094 | 2.418228  | F  | -3.132924 | 3.113949  | -2.317877 |
| F               | 1.986519  | -1.635841 | 1.989715  | Si | 3.424799  | -1.694673 | -0.016309 |
| F               | 2.826545  | 4.029910  | -0.449366 | C  | 3.150447  | -2.190051 | 1.844110  |
| F               | 2.194086  | 2.962648  | -1.714084 | F  | 2.137252  | -3.041752 | 1.981986  |
| F               | 1.382979  | 3.053730  | -0.146148 | Si | 3.463768  | 1.686786  | -0.016914 |
| F               | 3.492094  | 2.641673  | 2.268833  | C  | 2.268116  | 3.122657  | -0.549106 |
| F               | 2.455877  | 1.208252  | 2.249897  | F  | 1.218487  | 3.211380  | 0.290023  |
| F               | 4.213749  | 1.030801  | 2.285552  | C  | 2.582250  | -3.067303 | -1.101995 |
| F               | 5.610347  | 2.866561  | -0.131512 | F  | 3.078807  | -3.062790 | -2.354839 |
| F               | 5.879735  | 1.131973  | -0.322002 | C  | 5.319878  | -1.919291 | -0.351901 |
| F               | 5.248998  | 2.084572  | -1.672345 | F  | 6.059632  | -1.234464 | 0.533062  |
|                 |           |           |           | F  | 2.836655  | -4.275750 | -0.582041 |
|                 |           |           |           | F  | 1.252768  | -2.941771 | -1.202437 |
|                 |           |           |           | C  | 3.643142  | 1.881182  | 1.895109  |
|                 |           |           |           | F  | 4.618241  | 1.090839  | 2.369311  |
|                 |           |           |           | C  | 5.161629  | 2.149272  | -0.828323 |
| <b>33DH</b>     |           |           |           |    |           |           |           |
| 69              |           |           |           |    |           |           |           |
| E: -6010.291270 |           |           |           |    |           |           |           |
| C               | 1.299459  | 0.035636  | -0.435780 |    |           |           |           |

|   |           |           |           |                           |           |           |           |
|---|-----------|-----------|-----------|---------------------------|-----------|-----------|-----------|
| F | 4.971292  | 2.521991  | -2.109740 | H                         | 1.597453  | 0.044433  | -3.757680 |
| F | 3.941879  | 3.142188  | 2.231541  | H                         | -3.905941 | 0.037415  | -2.577855 |
| F | 2.501099  | 1.559179  | 2.524803  | H                         | -1.563099 | 0.085252  | -3.762508 |
| C | -2.295495 | -3.128425 | -0.489329 | H                         | -0.004374 | 1.343398  | 1.325915  |
| F | -1.277954 | -3.254931 | 0.359754  |                           |           |           |           |
| C | -3.893466 | -1.805093 | 1.864069  | <b>{33D}</b> <sub>2</sub> |           |           |           |
| F | -4.720009 | -0.794665 | 2.216208  | 136                       |           |           |           |
| F | -2.989583 | -4.281390 | -0.467292 | E= -12019.3640216         |           |           |           |
| F | -1.786146 | -2.992873 | -1.725846 | C                         | 3.777530  | -3.086304 | 1.756346  |
| C | -5.313177 | 1.971236  | -0.187416 | C                         | 2.943973  | -2.497376 | 0.750089  |
| F | -6.042222 | 1.174130  | 0.600700  | C                         | 2.459653  | -1.275797 | 1.131517  |
| C | -2.916495 | 2.057584  | 1.839726  | C                         | 3.133399  | -0.933388 | 2.465931  |
| F | -1.932138 | 2.972517  | 1.894613  | C                         | 3.901337  | -2.207979 | 2.769926  |
| F | -5.612689 | 3.239723  | 0.129962  | P                         | 1.674397  | -0.451257 | -0.348547 |
| F | -5.710536 | 1.774339  | -1.456802 | O                         | 0.066877  | -0.267844 | 0.105418  |
| F | 5.669583  | -3.208685 | -0.263093 | P                         | -1.245371 | 0.615627  | -0.204508 |
| F | 5.668891  | -1.500409 | -1.584064 | C                         | -2.279386 | 0.066372  | 1.230456  |
| F | 4.254887  | -2.801603 | 2.313182  | C                         | -3.111939 | -1.052680 | 1.822923  |
| F | 2.925340  | -1.127580 | 2.623435  | C                         | -3.322815 | -0.561545 | 3.244416  |
| F | -4.531250 | -2.953958 | 2.128184  | C                         | -2.813042 | 0.678553  | 3.394833  |
| F | -2.819846 | -1.749154 | 2.643189  | C                         | -2.214711 | 1.070337  | 2.154718  |
| F | -5.887382 | -2.965719 | -0.389552 | C                         | 2.678039  | -2.864362 | -0.626246 |
| F | -5.867286 | -0.952753 | -1.175801 | C                         | 1.835816  | -2.028288 | -1.305595 |
| F | -3.940087 | 2.520238  | 2.559660  | C                         | 1.824966  | -2.491244 | -2.759039 |
| F | -2.452497 | 0.952746  | 2.451898  | C                         | 2.808531  | -3.647058 | -2.739390 |
| F | -2.894375 | 4.285260  | -0.517614 | C                         | 3.267414  | -3.848714 | -1.489125 |
| F | -1.288964 | 3.005057  | -1.193062 | Si                        | 2.544220  | -1.224113 | -3.972143 |
| F | 5.747982  | 3.169458  | -0.193765 | C                         | 4.245526  | -0.563883 | -3.310923 |
| F | 6.026962  | 1.127202  | -0.840510 | Si                        | 0.222131  | -3.467970 | -3.116984 |
| F | 2.919403  | 4.293509  | -0.489853 | C                         | -1.443424 | -2.523590 | -2.854701 |
| F | 1.778929  | 2.999888  | -1.789574 | Si                        | 4.582147  | 0.220922  | 1.911505  |
| H | 3.933518  | -0.002175 | -2.558453 | C                         | 3.946305  | 1.863413  | 1.073090  |

|    |           |           |           |   |           |           |           |
|----|-----------|-----------|-----------|---|-----------|-----------|-----------|
| Si | 2.248339  | -0.489021 | 4.102533  | H | 4.499999  | -2.347385 | 3.658598  |
| C  | 0.717178  | -1.441358 | 4.856802  | F | -0.749194 | -5.136089 | -5.042598 |
| Si | -2.531121 | -2.867418 | 1.887842  | F | -0.382211 | -3.136817 | -5.762569 |
| C  | -0.611853 | -2.993543 | 1.687898  | F | 1.278264  | -4.499182 | -5.432509 |
| Si | -4.923710 | -0.668064 | 1.245026  | F | -1.056541 | -5.668835 | -2.189011 |
| C  | -5.277870 | -0.892225 | -0.666810 | F | 0.979718  | -6.053059 | -2.801017 |
| C  | -1.762581 | 2.364422  | 1.626813  | F | 0.583472  | -5.150092 | -0.884179 |
| C  | -1.143788 | 2.317079  | 0.417780  | F | -2.478431 | -3.290463 | -3.224344 |
| C  | -1.234665 | 3.693321  | -0.219328 | F | -1.633272 | -2.193744 | -1.564638 |
| C  | -1.913166 | 4.488682  | 0.880834  | F | -1.479862 | -1.411525 | -3.585606 |
| C  | -2.189036 | 3.700433  | 1.939632  | F | -6.717343 | 1.361721  | 1.143550  |
| Si | 0.439162  | 4.593874  | -0.381314 | F | -6.122211 | 0.857460  | 3.155162  |
| C  | 1.786289  | 3.770488  | -1.507410 | F | -4.861654 | 2.105978  | 1.947924  |
| Si | -2.486748 | 3.708864  | -1.675131 | F | -6.042262 | 0.084699  | -1.164748 |
| C  | -4.157920 | 2.835325  | -1.205238 | F | -4.147740 | -0.936548 | -1.376208 |
| O  | -1.717200 | 0.628065  | -1.599053 | F | -5.938043 | -2.042233 | -0.879056 |
| C  | 2.997749  | -1.858883 | -5.753831 | F | -7.423885 | -1.647511 | 1.638829  |
| C  | 1.363074  | 0.286928  | -4.170548 | F | -5.892838 | -3.177832 | 1.741159  |
| C  | 0.086091  | -4.093839 | -4.950234 | F | -6.201670 | -1.843816 | 3.408471  |
| C  | 0.185269  | -5.169583 | -2.160120 | F | -2.207632 | -4.937093 | 0.175081  |
| C  | 5.874149  | 0.915184  | 3.203311  | F | -4.113437 | -4.999618 | 1.165805  |
| C  | 5.820483  | -0.678899 | 0.688518  | F | -3.792145 | -3.604167 | -0.452681 |
| C  | 3.471521  | -0.761118 | 5.603936  | F | -2.553004 | -4.982315 | 3.585456  |
| C  | 1.586148  | 1.317961  | 4.088120  | F | -2.159161 | -3.114331 | 4.597534  |
| C  | -2.879702 | -3.684555 | 3.618127  | F | -4.168958 | -3.600268 | 3.981830  |
| C  | -3.220492 | -4.172447 | 0.613827  | F | -0.113626 | -4.086719 | 2.276633  |
| C  | 0.319490  | 6.409188  | -1.065067 | F | -0.243721 | -3.032152 | 0.405689  |
| C  | 1.140909  | 4.915820  | 1.409438  | F | 0.000767  | -1.927992 | 2.232765  |
| C  | -3.187323 | 5.492147  | -2.069876 | F | 2.020490  | 1.440534  | -4.326091 |
| C  | -1.831332 | 3.073352  | -3.395686 | F | 0.530186  | 0.146817  | -5.208369 |
| C  | -6.180512 | -1.905230 | 2.068206  | F | 0.612085  | 0.383703  | -3.059361 |
| C  | -5.664041 | 1.034698  | 1.901551  | F | 4.817553  | 0.272142  | -4.183846 |

|   |           |           |           |                 |           |           |           |
|---|-----------|-----------|-----------|-----------------|-----------|-----------|-----------|
| F | 4.106955  | 0.110502  | -2.160130 | F               | -4.280040 | 5.338716  | -2.840240 |
| F | 5.108828  | -1.570930 | -3.095874 | F               | -3.574282 | 6.163137  | -0.968745 |
| F | 3.724006  | -0.913913 | -6.372316 | F               | -2.344361 | 6.283720  | -2.735811 |
| F | 3.752108  | -2.973060 | -5.705186 | F               | -4.838700 | 2.497164  | -2.298924 |
| F | 1.944822  | -2.109288 | -6.531752 | F               | -4.004598 | 1.719048  | -0.464361 |
| F | 0.745452  | -1.249476 | 6.188402  | F               | -4.929211 | 3.663517  | -0.482750 |
| F | -0.456969 | -0.935730 | 4.446967  | F               | -2.458036 | 2.004190  | -3.865329 |
| F | 0.720463  | -2.758251 | 4.644835  | F               | -1.962532 | 4.046491  | -4.317299 |
| F | 3.243082  | 0.116119  | 6.584315  | F               | -0.518899 | 2.798735  | -3.311037 |
| F | 3.298032  | -2.000446 | 6.102700  | H               | 3.044001  | -4.232650 | -3.617169 |
| F | 4.772639  | -0.679289 | 5.287380  | H               | 3.964394  | -4.617430 | -1.189187 |
| F | 0.950048  | 1.660466  | 5.213105  | H               | 4.261885  | -4.049903 | 1.694183  |
| F | 2.554755  | 2.220127  | 3.878725  | H               | -3.878825 | -1.115507 | 3.986884  |
| F | 0.695186  | 1.419478  | 3.079257  | H               | -2.878299 | 1.284155  | 4.286453  |
| F | 6.700075  | 1.737163  | 2.531596  | H               | -2.682808 | 4.013676  | 2.847576  |
| F | 5.309623  | 1.635676  | 4.182769  | H               | -2.107545 | 5.548572  | 0.806437  |
| F | 6.644392  | -0.024438 | 3.761931  |                 |           |           |           |
| F | 6.585397  | 0.246069  | 0.094948  | <b>33F</b>      |           |           |           |
| F | 6.641508  | -1.487671 | 1.383605  | 152             |           |           |           |
| F | 5.280702  | -1.425353 | -0.281560 | E: -3731.720817 |           |           |           |
| F | 4.312626  | 1.913395  | -0.207873 | C               | -1.676028 | 3.005358  | -0.647609 |
| F | 2.595061  | 1.951797  | 1.118464  | C               | -2.756930 | 2.639214  | 0.146829  |
| F | 4.416203  | 2.957364  | 1.674242  | C               | -3.253274 | 3.620608  | 1.021414  |
| F | 2.450842  | 5.171901  | 1.404747  | C               | -2.659864 | 4.861249  | 1.153094  |
| F | 0.526457  | 5.998769  | 1.931492  | C               | -1.542003 | 5.184228  | 0.393492  |
| F | 0.928166  | 3.905397  | 2.260165  | C               | -1.069991 | 4.255892  | -0.513963 |
| F | 3.012261  | 4.111682  | -1.085771 | C               | -3.598952 | 1.305337  | 0.080486  |
| F | 1.698251  | 2.432530  | -1.487596 | C               | -3.894411 | 0.947669  | 1.559645  |
| F | 1.691532  | 4.165146  | -2.779788 | C               | -2.893700 | 1.180161  | 2.508570  |
| F | 1.426050  | 7.083174  | -0.708352 | C               | -3.084400 | 0.929117  | 3.857797  |
| F | 0.238517  | 6.463159  | -2.397315 | C               | -4.302531 | 0.445957  | 4.314492  |
| F | -0.735104 | 7.078251  | -0.562552 | C               | -5.304987 | 0.185540  | 3.391566  |



|   |           |           |           |   |           |           |           |
|---|-----------|-----------|-----------|---|-----------|-----------|-----------|
| C | -5.097986 | 0.419988  | 2.036375  | C | 7.009013  | 2.276076  | 0.897874  |
| C | -2.839581 | 0.004993  | -0.684180 | C | 5.625880  | 2.220797  | 0.774386  |
| C | -1.328764 | 0.046191  | -0.525946 | C | -2.493983 | -2.228007 | 0.832223  |
| C | -0.712835 | 0.095999  | -1.762323 | C | -1.433000 | -3.126563 | 0.663154  |
| C | -1.718129 | 0.186570  | -2.794063 | C | -0.695655 | -3.617501 | 1.735003  |
| C | -2.921429 | 0.136588  | -2.204229 | C | -1.012067 | -3.255695 | 3.033931  |
| C | -3.316734 | -1.625376 | -0.356682 | C | -2.092464 | -2.413217 | 3.234497  |
| C | -4.826912 | -1.722169 | -0.076726 | C | -2.811470 | -1.919511 | 2.156802  |
| C | -5.345643 | -2.652632 | 0.826293  | C | -3.078468 | -2.515281 | -1.633883 |
| C | -6.714495 | -2.790185 | 1.016675  | C | -4.122128 | -3.221300 | -2.238960 |
| C | -7.609767 | -2.018585 | 0.288132  | C | -3.925204 | -4.018659 | -3.364279 |
| C | -7.113836 | -1.134913 | -0.660487 | C | -2.670939 | -4.144160 | -3.932368 |
| C | -5.744700 | -1.005681 | -0.844416 | C | -1.610094 | -3.470121 | -3.340494 |
| P | -0.053996 | -0.046778 | 0.629471  | C | -1.813339 | -2.689185 | -2.216016 |
| O | -0.147201 | -0.008790 | 2.105608  | C | -4.830743 | 1.886299  | -0.705022 |
| C | 0.714271  | -0.002147 | -1.731379 | C | -6.068958 | 2.177552  | -0.129713 |
| C | 1.292558  | -0.005659 | -0.463190 | C | -7.097014 | 2.771617  | -0.855031 |
| C | 2.821462  | -0.071921 | -0.596710 | C | -6.916824 | 3.128226  | -2.180180 |
| C | 2.914556  | -0.289844 | -2.110445 | C | -5.662840 | 2.939022  | -2.746693 |
| C | 1.728927  | -0.196010 | -2.730395 | C | -4.642220 | 2.358449  | -2.011909 |
| C | 3.474484  | -1.327337 | 0.256863  | C | 3.378431  | -1.018211 | 1.768830  |
| C | 2.760865  | -2.709837 | 0.030798  | C | 4.284517  | -0.186309 | 2.432651  |
| C | 3.241441  | -3.771698 | 0.815478  | C | 4.151792  | 0.112182  | 3.779305  |
| C | 2.790100  | -5.067646 | 0.654490  | C | 3.087692  | -0.399884 | 4.510004  |
| C | 1.838207  | -5.362979 | -0.318188 | C | 2.167201  | -1.212667 | 3.869281  |
| C | 1.354755  | -4.334200 | -1.103730 | C | 2.320159  | -1.524257 | 2.524695  |
| C | 1.806116  | -3.025564 | -0.926796 | C | 4.919540  | -1.721734 | -0.202975 |
| C | 3.460737  | 1.522285  | -0.423543 | C | 5.095139  | -2.241991 | -1.493826 |
| C | 5.003355  | 1.529254  | -0.269903 | C | 6.328990  | -2.665216 | -1.956182 |
| C | 5.853133  | 0.909309  | -1.191513 | C | 7.438977  | -2.636682 | -1.119333 |
| C | 7.234356  | 0.967795  | -1.083406 | C | 7.268166  | -2.219851 | 0.188683  |
| C | 7.825678  | 1.650890  | -0.031743 | C | 6.027407  | -1.781549 | 0.640619  |

|   |           |           |           |   |           |           |           |
|---|-----------|-----------|-----------|---|-----------|-----------|-----------|
| C | 3.068866  | 2.294775  | -1.730711 | H | -7.078845 | -3.512029 | 1.739043  |
| C | 3.954134  | 2.617866  | -2.757125 | H | -8.678016 | -2.119682 | 0.442650  |
| C | 3.519852  | 3.246728  | -3.921000 | H | -7.786526 | -0.533163 | -1.260750 |
| C | 2.185775  | 3.577609  | -4.088482 | H | -5.407501 | -0.322918 | -1.606862 |
| C | 1.299934  | 3.322005  | -3.048092 | H | -6.258149 | 1.971763  | 0.909909  |
| C | 1.744019  | 2.719852  | -1.883036 | H | -8.043778 | 2.961685  | -0.361549 |
| C | 2.834695  | 2.393935  | 0.700822  | H | -7.719780 | 3.583737  | -2.748152 |
| C | 2.990495  | 3.787654  | 0.593745  | H | -5.463444 | 3.271946  | -3.759213 |
| C | 2.433258  | 4.657024  | 1.513792  | H | -3.661791 | 2.308599  | -2.462128 |
| C | 1.684433  | 4.165986  | 2.580150  | H | -1.934451 | 1.567319  | 2.202019  |
| C | 1.542479  | 2.798555  | 2.716933  | H | -2.267492 | 1.109986  | 4.546311  |
| C | 2.127727  | 1.930420  | 1.796794  | H | -4.464053 | 0.261148  | 5.370678  |
| H | -3.852695 | 0.088317  | -2.744120 | H | -6.256445 | -0.222741 | 3.713066  |
| H | -1.530848 | 0.215706  | -3.858340 | H | -5.890974 | 0.145680  | 1.361725  |
| H | 3.849740  | -0.378902 | -2.632749 | H | -4.126922 | 3.406363  | 1.623115  |
| H | 1.565126  | -0.224362 | -3.798489 | H | -3.075142 | 5.577173  | 1.853478  |
| H | 1.404001  | -2.267927 | -1.573320 | H | -1.056412 | 6.147270  | 0.499041  |
| H | 0.606688  | -4.534596 | -1.862947 | H | -0.210207 | 4.499304  | -1.125210 |
| H | 1.483472  | -6.377899 | -0.455757 | H | -1.284325 | 2.332721  | -1.391689 |
| H | 3.191394  | -5.853493 | 1.284469  | H | 5.094946  | 0.269731  | 1.891935  |
| H | 3.998272  | -3.576397 | 1.565418  | H | 4.875524  | 0.768626  | 4.249449  |
| H | -0.954241 | -2.200119 | -1.790671 | H | 2.971900  | -0.155618 | 5.559933  |
| H | -0.609767 | -3.549567 | -3.753556 | H | 1.302422  | -1.595780 | 4.397784  |
| H | -2.516755 | -4.759514 | -4.811378 | H | 1.572599  | -2.156501 | 2.067275  |
| H | -4.773825 | -4.542583 | -3.789671 | H | 5.451283  | 0.354345  | -2.022411 |
| H | -5.124839 | -3.170494 | -1.844212 | H | 7.842199  | 0.456734  | -1.820578 |
| H | -3.663159 | -1.304640 | 2.372422  | H | 8.904761  | 1.694191  | 0.061895  |
| H | -2.388546 | -2.117738 | 4.234420  | H | 7.442925  | 2.817389  | 1.731249  |
| H | -0.436612 | -3.636496 | 3.870492  | H | 5.027157  | 2.712218  | 1.528034  |
| H | 0.127844  | -4.293379 | 1.532831  | H | 4.238975  | -2.361854 | -2.143416 |
| H | -1.157670 | -3.495303 | -0.308360 | H | 6.415458  | -3.049137 | -2.966727 |
| H | -4.678074 | -3.284643 | 1.394283  | H | 8.407320  | -2.971816 | -1.473141 |

|                 |           |           |           |   |           |           |           |
|-----------------|-----------|-----------|-----------|---|-----------|-----------|-----------|
| H               | 8.103666  | -2.232284 | 0.879564  | C | -1.673450 | 0.345595  | -2.624881 |
| H               | 5.948195  | -1.503568 | 1.678513  | C | -2.869374 | 0.503152  | -2.049104 |
| H               | 3.555706  | 4.201137  | -0.232640 | C | 0.716152  | -0.150089 | -1.588254 |
| H               | 2.573752  | 5.725002  | 1.388901  | C | 1.334240  | -0.021327 | -0.393530 |
| H               | 1.222308  | 4.844753  | 3.287850  | C | 2.850172  | -0.156226 | -0.580295 |
| H               | 0.969967  | 2.372350  | 3.532208  | C | 2.869956  | -0.542374 | -2.062428 |
| H               | 2.004710  | 0.880555  | 1.976840  | C | 1.658952  | -0.504776 | -2.625814 |
| H               | 5.006364  | 2.395297  | -2.668359 | C | 3.548683  | -1.339614 | 0.361672  |
| H               | 4.241671  | 3.478721  | -4.696338 | C | 4.859286  | -1.924723 | -0.270292 |
| H               | 1.844188  | 4.055782  | -4.999498 | C | 6.101403  | -1.950518 | 0.360329  |
| H               | 0.256241  | 3.604527  | -3.139382 | C | 7.210771  | -2.547788 | -0.231520 |
| H               | 1.048374  | 2.571757  | -1.070828 | C | 7.109963  | -3.159965 | -1.467942 |
|                 |           |           |           | C | 5.860834  | -3.223363 | -2.076534 |
| <b>33FH</b>     |           |           |           | C | 4.759789  | -2.642768 | -1.471306 |
| 153             |           |           |           | C | 3.469420  | 1.453671  | -0.592422 |
| E: -3732.356263 |           |           |           | C | 2.963430  | 2.099444  | -1.925826 |
| C               | -2.281873 | -2.076329 | 1.648635  | C | 3.753088  | 2.251890  | -3.063975 |
| C               | -3.082530 | -2.392023 | 0.567720  | C | 3.229502  | 2.760415  | -4.248587 |
| C               | -3.430806 | -3.746599 | 0.408375  | C | 1.898940  | 3.139287  | -4.327480 |
| C               | -2.990496 | -4.719559 | 1.285420  | C | 1.109594  | 3.049472  | -3.187142 |
| C               | -2.159915 | -4.378106 | 2.351783  | C | 1.643895  | 2.560560  | -2.006076 |
| C               | -1.809270 | -3.053969 | 2.523305  | P | 0.032439  | 0.258471  | 0.842423  |
| C               | -3.548957 | -1.422596 | -0.556260 | O | 0.115867  | -0.428414 | 2.160858  |
| C               | -3.033095 | -2.157259 | -1.841270 | C | -3.501741 | 1.339041  | 0.384824  |
| C               | -3.788868 | -2.392241 | -2.987971 | C | -4.932172 | 1.772969  | -0.079176 |
| C               | -3.241426 | -3.025405 | -4.100522 | C | -5.053940 | 2.444361  | -1.304682 |
| C               | -1.922848 | -3.450900 | -4.096659 | C | -6.268625 | 2.919680  | -1.766481 |
| C               | -1.170142 | -3.280600 | -2.940605 | C | -7.415012 | 2.780662  | -0.992443 |
| C               | -1.728883 | -2.667165 | -1.832134 | C | -7.302774 | 2.194485  | 0.255556  |
| C               | -2.843874 | 0.169834  | -0.556762 | C | -6.079523 | 1.709565  | 0.708627  |
| C               | -1.328729 | 0.008274  | -0.363606 | C | 2.708817  | -2.662626 | 0.487822  |
| C               | -0.726558 | 0.025156  | -1.578293 | C | 1.529366  | -2.997811 | -0.163306 |

|   |           |           |           |   |           |           |           |
|---|-----------|-----------|-----------|---|-----------|-----------|-----------|
| C | 0.897184  | -4.222951 | 0.056927  | C | -2.293392 | 0.912855  | 4.020858  |
| C | 1.442179  | -5.155153 | 0.917729  | C | -2.413220 | 1.350724  | 2.708544  |
| C | 2.647876  | -4.858637 | 1.546012  | C | -5.101970 | -1.352331 | -0.568663 |
| C | 3.265304  | -3.642676 | 1.326810  | C | -5.826571 | -0.682953 | -1.561844 |
| C | 3.757675  | -0.823123 | 1.807316  | C | -7.212396 | -0.665545 | -1.589088 |
| C | 2.845937  | -1.151722 | 2.814757  | C | -7.941945 | -1.317098 | -0.606701 |
| C | 2.972434  | -0.645868 | 4.102057  | C | -7.254955 | -1.986403 | 0.392554  |
| C | 4.026869  | 0.192620  | 4.430683  | C | -5.865274 | -2.007803 | 0.402993  |
| C | 4.948389  | 0.524124  | 3.447897  | H | 3.773648  | -0.723393 | -2.614993 |
| C | 4.810528  | 0.023540  | 2.161796  | H | 1.426699  | -0.665539 | -3.668789 |
| C | 5.021418  | 1.509735  | -0.577307 | H | -3.770069 | 0.705202  | -2.597899 |
| C | 5.706631  | 2.423772  | 0.233196  | H | -1.449555 | 0.422557  | -3.679358 |
| C | 7.091050  | 2.522186  | 0.219831  | H | -1.308673 | 2.347480  | -1.237438 |
| C | 7.849754  | 1.710955  | -0.612063 | H | -0.281076 | 4.549043  | -1.136808 |
| C | 7.195542  | 0.802392  | -1.427695 | H | -1.139104 | 6.273316  | 0.417387  |
| C | 5.810170  | 0.709081  | -1.406223 | H | -3.088453 | 5.725450  | 1.871154  |
| C | 2.925275  | 2.391896  | 0.523068  | H | -4.092357 | 3.506953  | 1.794071  |
| C | 2.982193  | 3.778587  | 0.294087  | H | 1.020959  | 2.545496  | -1.124299 |
| C | 2.517714  | 4.694314  | 1.221688  | H | 0.073617  | 3.372434  | -3.209606 |
| C | 1.976186  | 4.260280  | 2.428143  | H | 1.488690  | 3.526318  | -5.253310 |
| C | 1.932283  | 2.902698  | 2.683034  | H | 3.876691  | 2.858929  | -5.113003 |
| C | 2.407840  | 1.989863  | 1.744046  | H | 4.797026  | 1.975281  | -3.047561 |
| C | -2.756538 | 2.716154  | 0.303659  | H | 2.337627  | 0.948533  | 1.999999  |
| C | -3.249659 | 3.723170  | 1.148239  | H | 1.521744  | 2.520971  | 3.610941  |
| C | -2.682426 | 4.982411  | 1.194047  | H | 1.597679  | 4.973571  | 3.151256  |
| C | -1.597595 | 5.292011  | 0.378968  | H | 2.575736  | 5.753499  | 0.997091  |
| C | -1.121456 | 4.327537  | -0.488602 | H | 3.400165  | 4.151458  | -0.632630 |
| C | -1.701879 | 3.058864  | -0.532435 | H | 5.162860  | 3.051550  | 0.922848  |
| C | -3.435703 | 0.897950  | 1.870216  | H | 7.574613  | 3.238430  | 0.874742  |
| C | -4.342340 | -0.005719 | 2.427620  | H | 8.931234  | 1.783975  | -0.620860 |
| C | -4.246767 | -0.427698 | 3.743973  | H | 7.755493  | 0.140878  | -2.078304 |
| C | -3.214608 | 0.025906  | 4.552377  | H | 5.362965  | -0.026548 | -2.052542 |

|   |           |           |           |                           |           |           |           |
|---|-----------|-----------|-----------|---------------------------|-----------|-----------|-----------|
| H | 6.233801  | -1.518109 | 1.338333  | H                         | -1.788098 | -5.141267 | 3.026252  |
| H | 8.159570  | -2.527896 | 0.292944  | H                         | -1.149586 | -2.743604 | 3.324189  |
| H | 7.975557  | -3.617656 | -1.933176 | H                         | -1.979138 | -1.068921 | 1.853183  |
| H | 5.734596  | -3.756248 | -3.012481 | H                         | -4.826959 | -2.101172 | -3.035287 |
| H | 3.789488  | -2.784438 | -1.928222 | H                         | -3.864236 | -3.189521 | -4.973021 |
| H | 1.985872  | -1.764157 | 2.595498  | H                         | -1.497261 | -3.938643 | -4.966334 |
| H | 2.223845  | -0.905837 | 4.841362  | H                         | -0.148988 | -3.644223 | -2.887093 |
| H | 4.125616  | 0.588748  | 5.435237  | H                         | -1.144310 | -2.588325 | -0.928541 |
| H | 5.777015  | 1.187287  | 3.670261  | H                         | -0.025254 | 1.662947  | 0.931528  |
| H | 5.531322  | 0.331603  | 1.425955  |                           |           |           |           |
| H | 4.201715  | -3.440160 | 1.832142  | <b>{33F}</b> <sub>2</sub> |           |           |           |
| H | 3.110024  | -5.577263 | 2.213601  | 304                       |           |           |           |
| H | 0.941440  | -6.099911 | 1.094899  | E= -7463.3172583          |           |           |           |
| H | -0.040344 | -4.435683 | -0.444234 | C                         | -2.957718 | -6.036764 | -0.405653 |
| H | 1.071899  | -2.316392 | -0.856132 | C                         | -3.035420 | -4.635878 | -0.489855 |
| H | -5.126763 | -0.420571 | 1.821195  | C                         | -3.174857 | -3.951596 | 0.709050  |
| H | -4.971937 | -1.137487 | 4.125996  | C                         | -3.280045 | -4.629326 | 1.924478  |
| H | -3.124381 | -0.315862 | 5.577076  | C                         | -3.273882 | -6.008570 | 1.974893  |
| H | -1.461684 | 1.265780  | 4.618504  | C                         | -3.097339 | -6.714413 | 0.790040  |
| H | -1.683258 | 2.061713  | 2.348378  | C                         | -2.984131 | -4.001437 | -1.920044 |
| H | -5.320983 | -0.147015 | -2.346336 | C                         | -4.024263 | -4.842880 | -2.754581 |
| H | -7.716362 | -0.118748 | -2.377169 | C                         | -5.158746 | -5.408123 | -2.158399 |
| H | -9.025669 | -1.299767 | -0.619060 | C                         | -6.077406 | -6.156110 | -2.880299 |
| H | -7.795422 | -2.505981 | 1.175949  | C                         | -5.882026 | -6.391472 | -4.233629 |
| H | -5.374337 | -2.546098 | 1.200850  | C                         | -4.756010 | -5.864951 | -4.843409 |
| H | -4.169424 | 2.641983  | -1.895307 | C                         | -3.853561 | -5.105730 | -4.111425 |
| H | -6.312908 | 3.426971  | -2.723975 | C                         | -3.487260 | -2.411713 | -1.930518 |
| H | -8.369379 | 3.154600  | -1.345346 | C                         | -2.891298 | -1.196794 | -0.922560 |
| H | -8.171300 | 2.109048  | 0.898870  | C                         | -4.022809 | -0.716072 | -0.342995 |
| H | -6.046611 | 1.298572  | 1.704035  | C                         | -5.192478 | -1.548837 | -0.514934 |
| H | -4.046837 | -4.044262 | -0.432339 | C                         | -4.885083 | -2.512785 | -1.362509 |
| H | -3.280664 | -5.752061 | 1.124560  | C                         | -4.026480 | 0.402351  | 0.534044  |

|   |           |           |           |   |           |           |           |
|---|-----------|-----------|-----------|---|-----------|-----------|-----------|
| C | -2.882659 | 0.858730  | 1.099356  | C | -5.960588 | -2.713383 | -4.121965 |
| C | -3.410297 | 1.955044  | 2.225372  | C | 2.997192  | 1.677038  | 0.499177  |
| C | -4.890571 | 1.879207  | 1.963198  | C | 2.365526  | 1.503027  | -0.678077 |
| C | -5.236673 | 0.998303  | 1.041364  | C | 2.781972  | 2.841935  | -1.550171 |
| C | -3.016559 | 3.568856  | 1.859545  | C | 3.208226  | 3.720763  | -0.386324 |
| C | -3.937451 | 4.580955  | 2.682088  | C | 3.438989  | 3.028212  | 0.723876  |
| C | -3.493032 | 5.395712  | 3.730105  | C | 4.380654  | 2.572932  | -2.211887 |
| C | -4.323608 | 6.271482  | 4.417765  | C | 5.421031  | 1.994440  | -1.177335 |
| C | -5.661399 | 6.382338  | 4.089217  | C | 6.086260  | 2.834462  | -0.263957 |
| C | -6.130236 | 5.627304  | 3.026551  | C | 7.159732  | 2.394580  | 0.490161  |
| C | -5.282312 | 4.776138  | 2.334814  | C | 7.633692  | 1.091766  | 0.355524  |
| C | -3.308395 | 1.479984  | 3.869310  | C | 7.006850  | 0.252041  | -0.544350 |
| C | -1.940883 | 1.758164  | 4.537159  | C | 5.924669  | 0.708540  | -1.293782 |
| C | -1.064238 | 0.726214  | 4.872595  | C | 1.772002  | 3.574409  | -2.657106 |
| C | 0.030912  | 0.956206  | 5.695453  | C | 2.273835  | 3.444277  | -4.134960 |
| C | 0.329769  | 2.227255  | 6.156363  | C | 1.881671  | 2.319903  | -4.869973 |
| C | -0.454758 | 3.284850  | 5.730859  | C | 2.171313  | 2.161727  | -6.211710 |
| C | -1.562735 | 3.034746  | 4.940204  | C | 2.892171  | 3.137575  | -6.888284 |
| P | -1.629613 | -0.556611 | 0.504283  | C | 3.316491  | 4.251114  | -6.185838 |
| O | -0.090633 | 0.159180  | 0.126243  | C | 3.007178  | 4.399552  | -4.835883 |
| P | 1.471238  | -0.200381 | -0.318409 | C | 3.013787  | -1.934233 | 3.631942  |
| C | 2.599282  | -0.649336 | 1.146415  | C | 1.505790  | -2.114350 | 3.894769  |
| C | 3.332738  | 0.480907  | 1.251158  | C | 1.080992  | -2.167541 | 5.231796  |
| C | 4.627514  | 0.277675  | 1.843862  | C | -0.215665 | -2.511209 | 5.571482  |
| C | 4.734233  | -1.013963 | 2.127906  | C | -1.146174 | -2.783154 | 4.573910  |
| C | 3.451410  | -1.798615 | 1.931920  | C | -0.769832 | -2.625009 | 3.253868  |
| C | -3.609104 | -1.734024 | -3.504674 | C | 0.533677  | -2.270638 | 2.923138  |
| C | -4.654320 | -2.386747 | -4.496224 | C | 3.665787  | -3.264989 | 1.196396  |
| C | -4.412506 | -2.391465 | -5.876485 | C | 2.425037  | -4.149709 | 1.427509  |
| C | -5.352107 | -2.838736 | -6.794363 | C | 2.298330  | -5.088881 | 2.443985  |
| C | -6.603431 | -3.262643 | -6.377694 | C | 1.180764  | -5.903231 | 2.561974  |
| C | -6.906293 | -3.164699 | -5.029114 | C | 0.160861  | -5.814244 | 1.635206  |

|   |           |           |           |   |           |           |           |
|---|-----------|-----------|-----------|---|-----------|-----------|-----------|
| C | 0.256433  | -4.870377 | 0.622123  | C | -0.493966 | -3.420055 | -2.224005 |
| C | 1.360174  | -4.042011 | 0.532442  | C | -3.658385 | -0.026248 | 4.189311  |
| C | -3.283424 | 4.004435  | 0.354015  | C | -3.674258 | -0.342906 | 5.562165  |
| C | -4.462087 | 3.759001  | -0.362057 | C | -4.196561 | -1.525656 | 6.044816  |
| C | -4.744386 | 4.386506  | -1.568294 | C | -4.760466 | -2.451996 | 5.170804  |
| C | -3.849902 | 5.278497  | -2.134746 | C | -4.724958 | -2.180060 | 3.817647  |
| C | -2.641816 | 5.483921  | -1.492157 | C | -4.150240 | -1.002338 | 3.335715  |
| C | -2.370529 | 4.852183  | -0.287513 | C | -4.501716 | 2.148449  | 4.711864  |
| C | -1.524304 | 3.831759  | 2.121772  | C | -4.359877 | 3.098236  | 5.718887  |
| C | -1.030749 | 5.127021  | 2.324739  | C | -5.443314 | 3.564638  | 6.462240  |
| C | 0.299162  | 5.363749  | 2.632372  | C | -6.716494 | 3.078676  | 6.245838  |
| C | 1.197329  | 4.309969  | 2.682721  | C | -6.882120 | 2.080336  | 5.292867  |
| C | 0.745608  | 3.037411  | 2.378255  | C | -5.799508 | 1.620206  | 4.567890  |
| C | -0.589457 | 2.805855  | 2.098023  | C | 5.128584  | 3.889715  | -2.627181 |
| O | 1.480765  | -1.196310 | -1.410176 | C | 6.467656  | 3.752490  | -3.034346 |
| C | -2.167407 | -1.700596 | -4.050594 | C | 7.264490  | 4.839753  | -3.346487 |
| C | -1.312030 | -0.729808 | -3.534735 | C | 6.766688  | 6.132696  | -3.233051 |
| C | -0.021439 | -0.577340 | -4.003247 | C | 5.461696  | 6.299273  | -2.808142 |
| C | 0.445906  | -1.363988 | -5.044607 | C | 4.664443  | 5.194994  | -2.515892 |
| C | -0.368013 | -2.369267 | -5.537642 | C | 4.305483  | 1.574992  | -3.396456 |
| C | -1.646100 | -2.547007 | -5.028185 | C | 3.605365  | 0.381037  | -3.246376 |
| C | -4.195433 | -0.272656 | -3.664240 | C | 3.614049  | -0.607877 | -4.215809 |
| C | -3.759630 | 0.465421  | -4.773637 | C | 4.327833  | -0.430259 | -5.390197 |
| C | -4.411784 | 1.610619  | -5.202107 | C | 5.011128  | 0.762986  | -5.573765 |
| C | -5.503253 | 2.106545  | -4.506053 | C | 4.997458  | 1.749261  | -4.596978 |
| C | -5.946776 | 1.402449  | -3.398032 | C | 0.316111  | 3.053964  | -2.667236 |
| C | -5.324609 | 0.223048  | -3.008750 | C | -0.490815 | 3.353125  | -3.777762 |
| C | -1.551515 | -4.298429 | -2.429002 | C | -1.830506 | 3.041148  | -3.798874 |
| C | -1.243120 | -5.532399 | -3.018312 | C | -2.418383 | 2.434576  | -2.698463 |
| C | 0.035176  | -5.836849 | -3.457274 | C | -1.647535 | 2.196249  | -1.586101 |
| C | 1.055542  | -4.911445 | -3.313804 | C | -0.297437 | 2.518504  | -1.556355 |
| C | 0.785571  | -3.709732 | -2.683297 | C | 1.429600  | 5.059209  | -2.262657 |

|   |          |           |           |   |           |           |           |
|---|----------|-----------|-----------|---|-----------|-----------|-----------|
| C | 1.206402 | 6.054939  | -3.219568 | H | 5.368160  | 1.044280  | 2.009603  |
| C | 0.801569 | 7.337040  | -2.867585 | H | -6.237098 | 0.790826  | 0.688455  |
| C | 0.575258 | 7.665698  | -1.540968 | H | -5.571257 | 2.519611  | 2.484769  |
| C | 0.707850 | 6.669802  | -0.583760 | H | -5.546641 | -3.308095 | -1.632713 |
| C | 1.099207 | 5.388297  | -0.942496 | H | -6.135959 | -1.415548 | -0.004068 |
| C | 3.797021 | -3.102702 | 4.344546  | H | 4.666614  | -1.255736 | -0.513076 |
| C | 5.195629 | -3.173458 | 4.394831  | H | 5.687653  | -1.622726 | -2.740897 |
| C | 5.882044 | -4.157222 | 5.091630  | H | 5.516993  | -3.787262 | -3.860126 |
| C | 5.192641 | -5.130508 | 5.794745  | H | 4.277766  | -5.643790 | -2.740180 |
| C | 3.808415 | -5.090003 | 5.777332  | H | 3.339247  | -5.317973 | -0.526092 |
| C | 3.135934 | -4.102571 | 5.068376  | H | 5.494947  | 0.050994  | -2.024700 |
| C | 3.388331 | -0.605730 | 4.359865  | H | 7.352865  | -0.765711 | -0.691693 |
| C | 4.431407 | -0.475677 | 5.282118  | H | 8.485715  | 0.751765  | 0.933360  |
| C | 4.790440 | 0.757397  | 5.810704  | H | 7.647954  | 3.085795  | 1.168176  |
| C | 4.107414 | 1.904705  | 5.440260  | H | 5.804750  | 3.873909  | -0.181964 |
| C | 3.012477 | 1.780695  | 4.598724  | H | 5.500417  | 2.677615  | -4.815988 |
| C | 2.639972 | 0.541662  | 4.098538  | H | 5.550394  | 0.947580  | -6.496400 |
| C | 3.933289 | -3.254117 | -0.338899 | H | 4.345865  | -1.202812 | -6.151147 |
| C | 4.569004 | -2.216058 | -0.999620 | H | 3.077754  | -1.526264 | -4.014551 |
| C | 5.149326 | -2.420582 | -2.248191 | H | 3.054260  | 0.173153  | -2.345789 |
| C | 5.056998 | -3.642903 | -2.889196 | H | 6.912568  | 2.767004  | -3.081269 |
| C | 4.367878 | -4.673233 | -2.265046 | H | 8.288912  | 4.671976  | -3.659059 |
| C | 3.823290 | -4.480656 | -1.009794 | H | 7.390598  | 6.989068  | -3.461688 |
| C | 5.034174 | -3.972715 | 1.570738  | H | 5.036618  | 7.291393  | -2.703296 |
| C | 5.144344 | -5.333479 | 1.865842  | H | 3.648446  | 5.405040  | -2.229447 |
| C | 6.372163 | -5.942261 | 2.100619  | H | 1.318494  | 5.838162  | -4.269881 |
| C | 7.550959 | -5.224315 | 2.008281  | H | 0.653884  | 8.075029  | -3.648289 |
| C | 7.477875 | -3.900085 | 1.595000  | H | 0.265711  | 8.665747  | -1.260241 |
| C | 6.250618 | -3.307815 | 1.352224  | H | 0.477266  | 6.874749  | 0.454112  |
| H | 3.485283 | 4.750750  | -0.502229 | H | 1.116723  | 4.632606  | -0.167151 |
| H | 3.900374 | 3.385865  | 1.632537  | H | 1.305586  | 1.550268  | -4.388970 |
| H | 5.590198 | -1.420985 | 2.621601  | H | 1.832087  | 1.267211  | -6.721029 |



|   |           |           |           |   |           |           |           |
|---|-----------|-----------|-----------|---|-----------|-----------|-----------|
| H | 3.121626  | 3.026671  | -7.942200 | H | -0.647074 | -2.474696 | -1.724096 |
| H | 3.886490  | 5.029603  | -6.680805 | H | -2.231184 | -3.352027 | -5.437179 |
| H | 3.348244  | 5.301025  | -4.359806 | H | -0.009525 | -3.036414 | -6.313208 |
| H | -0.068130 | 3.845904  | -4.641215 | H | 1.439779  | -1.213129 | -5.444578 |
| H | -2.422620 | 3.287787  | -4.670738 | H | 0.621325  | 0.139611  | -3.516224 |
| H | -3.469890 | 2.194900  | -2.687379 | H | -1.659100 | -0.068860 | -2.753770 |
| H | -2.112428 | 1.803996  | -0.700444 | H | -2.903009 | 0.133158  | -5.342064 |
| H | 0.243209  | 2.389300  | -0.631737 | H | -4.047922 | 2.122201  | -6.086178 |
| H | -1.394954 | 5.028211  | 0.126749  | H | -6.005439 | 3.011302  | -4.828925 |
| H | -1.876566 | 6.116173  | -1.929092 | H | -6.813125 | 1.746324  | -2.842743 |
| H | -4.072279 | 5.767962  | -3.075918 | H | -5.781023 | -0.330024 | -2.210662 |
| H | -5.677359 | 4.154774  | -2.069593 | H | -3.486741 | -2.006461 | -6.270990 |
| H | -5.199357 | 3.070337  | 0.005047  | H | -5.098439 | -2.832543 | -7.848834 |
| H | -1.690445 | 5.977098  | 2.225431  | H | -7.338161 | -3.619819 | -7.089985 |
| H | 0.632249  | 6.378816  | 2.819417  | H | -7.893427 | -3.430488 | -4.668023 |
| H | 2.237127  | 4.487045  | 2.929459  | H | -6.286475 | -2.590862 | -3.105186 |
| H | 1.422922  | 2.198472  | 2.374987  | H | 5.810681  | -2.446604 | 3.898372  |
| H | -0.889360 | 1.791854  | 1.900872  | H | 6.965268  | -4.154675 | 5.066482  |
| H | -2.464015 | 5.395037  | 4.041240  | H | 5.721626  | -5.902756 | 6.341326  |
| H | -3.904125 | 6.863044  | 5.223978  | H | 3.229562  | -5.838415 | 6.307147  |
| H | -6.317982 | 7.052498  | 4.631499  | H | 2.060375  | -4.161435 | 5.055014  |
| H | -7.163744 | 5.708101  | 2.709566  | H | 4.274716  | -5.966721 | 1.890152  |
| H | -5.704071 | 4.277671  | 1.479583  | H | 6.392318  | -6.997351 | 2.349852  |
| H | 3.081254  | -5.216941 | 3.163021  | H | 8.508066  | -5.695651 | 2.200213  |
| H | 1.132424  | -6.621734 | 3.373438  | H | 8.383634  | -3.327317 | 1.426912  |
| H | -0.697443 | -6.467947 | 1.689384  | H | 6.254874  | -2.309322 | 0.942119  |
| H | -0.523209 | -4.790816 | -0.117565 | H | 1.798426  | -1.977503 | 6.022649  |
| H | 1.408140  | -3.316540 | -0.269143 | H | -0.501414 | -2.560342 | 6.616327  |
| H | -2.008512 | -6.279366 | -3.165711 | H | -2.160204 | -3.065481 | 4.827893  |
| H | 0.222259  | -6.800945 | -3.917749 | H | -1.478714 | -2.781661 | 2.455504  |
| H | 2.055253  | -5.123677 | -3.672031 | H | 0.782317  | -2.167052 | 1.882402  |
| H | 1.566982  | -2.980329 | -2.526925 | H | 4.985694  | -1.338526 | 5.613540  |

|                |           |           |           |    |           |           |           |
|----------------|-----------|-----------|-----------|----|-----------|-----------|-----------|
| H              | 5.611156  | 0.810516  | 6.517592  | C  | 4.098056  | 3.392527  | -2.724962 |
| H              | 4.392043  | 2.873273  | 5.836271  | C  | 3.044558  | 2.788763  | -2.029657 |
| H              | 2.407075  | 2.646622  | 4.369608  | C  | 1.747628  | 2.994232  | -2.522698 |
| H              | 1.745002  | 0.460192  | 3.498131  | C  | 1.516076  | 3.754012  | -3.660107 |
| H              | -1.251991 | -0.284532 | 4.542116  | C  | 2.579850  | 4.343126  | -4.334634 |
| H              | 0.659399  | 0.123574  | 5.973533  | C  | 3.871338  | 4.162642  | -3.861394 |
| H              | 1.183669  | 2.386776  | 6.804101  | Si | 3.429043  | 1.733905  | -0.509562 |
| H              | -0.225294 | 4.304383  | 6.020628  | C  | 5.293761  | 1.737573  | -0.270973 |
| H              | -2.160171 | 3.865587  | 4.639313  | C  | 5.894517  | 2.596460  | 0.656558  |
| H              | -3.306472 | 0.381544  | 6.277226  | C  | 7.268840  | 2.587082  | 0.858237  |
| H              | -4.194228 | -1.709451 | 7.113236  | C  | 8.074413  | 1.718857  | 0.130133  |
| H              | -5.215256 | -3.362824 | 5.543473  | C  | 7.501216  | 0.875533  | -0.813726 |
| H              | -5.158327 | -2.873121 | 3.106277  | C  | 6.126377  | 0.893621  | -1.013504 |
| H              | -4.152501 | -0.859917 | 2.275601  | C  | 2.813876  | -0.099566 | -0.871219 |
| H              | -3.396558 | 3.493763  | 5.983519  | C  | 1.334373  | -0.016281 | -0.736794 |
| H              | -5.265663 | 4.318426  | 7.221094  | C  | 0.729097  | -0.045208 | -1.975390 |
| H              | -7.558876 | 3.444137  | 6.821820  | C  | 1.739921  | -0.225143 | -2.976429 |
| H              | -7.856562 | 1.634647  | 5.127051  | C  | 2.945008  | -0.281790 | -2.352024 |
| H              | -5.971353 | 0.799210  | 3.886655  | P  | 0.092530  | 0.206698  | 0.484156  |
| H              | -3.197842 | -2.874798 | 0.727208  | O  | 0.223871  | -0.220675 | 1.908564  |
| H              | -3.361915 | -4.059390 | 2.839593  | C  | -0.715862 | 0.087174  | -1.924049 |
| H              | -3.371371 | -6.526563 | 2.922092  | C  | -1.261733 | 0.031558  | -0.644624 |
| H              | -3.058294 | -7.798120 | 0.794407  | C  | -2.746552 | 0.193209  | -0.731047 |
| H              | -2.826434 | -6.623172 | -1.302889 | C  | -2.929668 | 0.452203  | -2.194931 |
| H              | -2.979890 | -4.733157 | -4.615837 | C  | -1.755102 | 0.351964  | -2.869944 |
| H              | -4.576072 | -6.025908 | -5.899692 | Si | -3.489293 | 1.572145  | 0.382282  |
| H              | -6.594654 | -6.978915 | -4.801183 | C  | -5.275030 | 1.958808  | -0.085460 |
| H              | -6.941775 | -6.567817 | -2.371324 | C  | -5.530765 | 2.504259  | -1.350943 |
| H              | -5.331623 | -5.286218 | -1.096819 | C  | -6.815199 | 2.854127  | -1.742218 |
| <b>33G</b>     |           |           |           | C  | -7.878186 | 2.687034  | -0.861636 |
| 152            |           |           |           | C  | -7.641826 | 2.183235  | 0.409346  |
| E=-4737.609321 |           |           |           | C  | -6.354216 | 1.825737  | 0.791872  |

|    |           |           |           |   |           |           |           |
|----|-----------|-----------|-----------|---|-----------|-----------|-----------|
| Si | -3.525319 | -1.607415 | -0.540962 | C | -3.123024 | -2.550473 | -2.124051 |
| C  | -2.826031 | -2.663703 | 0.845261  | C | -4.076110 | -2.905412 | -3.081664 |
| C  | -3.077707 | -4.042050 | 0.745660  | C | -3.710805 | -3.581239 | -4.241950 |
| C  | -2.611913 | -4.929193 | 1.704449  | C | -2.381725 | -3.914473 | -4.467445 |
| C  | -1.858903 | -4.459664 | 2.775959  | C | -1.419775 | -3.583399 | -3.519152 |
| C  | -1.590792 | -3.103991 | 2.885100  | C | -1.793510 | -2.917404 | -2.361169 |
| C  | -2.083742 | -2.214836 | 1.936554  | C | 2.416579  | -2.965674 | 0.403144  |
| Si | 3.617293  | -1.530451 | 0.171253  | C | 2.681051  | -3.866557 | 1.443265  |
| C  | 4.116331  | -0.956202 | 1.896616  | C | 1.910714  | -5.006048 | 1.627750  |
| C  | 3.169577  | -1.049761 | 2.926767  | C | 0.857111  | -5.276262 | 0.765553  |
| C  | 3.474715  | -0.654289 | 4.222737  | C | 0.588814  | -4.409519 | -0.283934 |
| C  | 4.735098  | -0.152934 | 4.522145  | C | 1.363779  | -3.268814 | -0.465080 |
| C  | 5.683303  | -0.033118 | 3.513034  | C | 5.064318  | -2.307920 | -0.773336 |
| C  | 5.374027  | -0.426946 | 2.216719  | C | 6.336653  | -2.506443 | -0.228560 |
| C  | -2.593035 | 3.208633  | 0.113812  | C | 7.338734  | -3.153749 | -0.943529 |
| C  | -2.950882 | 4.270130  | 0.956629  | C | 7.087653  | -3.632081 | -2.221817 |
| C  | -2.431717 | 5.544044  | 0.773711  | C | 5.818698  | -3.482995 | -2.769355 |
| C  | -1.537282 | 5.785892  | -0.264082 | C | 4.822977  | -2.838772 | -2.048346 |
| C  | -1.172905 | 4.749552  | -1.112370 | C | 2.569034  | 2.465761  | 0.998574  |
| C  | -1.697744 | 3.474391  | -0.923901 | C | 2.978992  | 2.189202  | 2.307153  |
| C  | -3.302990 | 1.081948  | 2.183221  | C | 2.279714  | 2.679319  | 3.402387  |
| C  | -4.169771 | 0.180648  | 2.816952  | C | 1.152508  | 3.468002  | 3.216210  |
| C  | -3.944277 | -0.238529 | 4.119697  | C | 0.740678  | 3.780681  | 1.927109  |
| C  | -2.832128 | 0.222376  | 4.815462  | C | 1.445072  | 3.287067  | 0.836733  |
| C  | -1.956456 | 1.109189  | 4.205233  | H | 3.896348  | -0.384165 | -2.854697 |
| C  | -2.197384 | 1.541228  | 2.907275  | H | 1.574976  | -0.281493 | -4.043432 |
| C  | -5.397230 | -1.494460 | -0.359982 | H | -3.897249 | 0.603959  | -2.652316 |
| C  | -6.205023 | -0.892792 | -1.333821 | H | -1.629445 | 0.431407  | -3.940820 |
| C  | -7.584395 | -0.842698 | -1.200579 | H | -1.407668 | 2.679630  | -1.600945 |
| C  | -8.192905 | -1.391935 | -0.078321 | H | -0.468144 | 4.930176  | -1.916611 |
| C  | -7.415035 | -1.996821 | 0.899154  | H | -1.125250 | 6.778223  | -0.409178 |
| C  | -6.032765 | -2.052342 | 0.754260  | H | -2.723862 | 6.348636  | 1.439482  |

|   |           |           |           |                 |           |           |           |
|---|-----------|-----------|-----------|-----------------|-----------|-----------|-----------|
| H | -3.651188 | 4.098951  | 1.769422  | H               | -4.624312 | -0.943583 | 4.584431  |
| H | 0.900021  | 2.541570  | -2.023747 | H               | -2.644713 | -0.119298 | 5.827551  |
| H | 0.501363  | 3.883732  | -4.022339 | H               | -1.070357 | 1.454556  | 4.725209  |
| H | 2.400696  | 4.939340  | -5.222559 | H               | -1.492103 | 2.226242  | 2.449406  |
| H | 4.708772  | 4.619930  | -4.376766 | H               | -5.757143 | -0.442280 | -2.212553 |
| H | 5.117264  | 3.261630  | -2.377083 | H               | -8.181864 | -0.357453 | -1.963498 |
| H | 3.856435  | 1.583528  | 2.485185  | H               | -9.270656 | -1.346777 | 0.032971  |
| H | 2.619023  | 2.431887  | 4.401985  | H               | -7.883000 | -2.432803 | 1.774988  |
| H | 0.600468  | 3.845226  | 4.070638  | H               | -5.439044 | -2.539168 | 1.521664  |
| H | -0.129484 | 4.405336  | 1.760102  | H               | -4.708728 | 2.681242  | -2.038328 |
| H | 1.105575  | 3.563525  | -0.151860 | H               | -6.985335 | 3.272122  | -2.728436 |
| H | 5.279952  | 3.270338  | 1.243657  | H               | -8.883266 | 2.962842  | -1.161589 |
| H | 7.710983  | 3.254394  | 1.589748  | H               | -8.462067 | 2.062778  | 1.108182  |
| H | 9.146254  | 1.703462  | 0.294471  | H               | -6.199254 | 1.445233  | 1.793626  |
| H | 8.117702  | 0.192531  | -1.387088 | H               | -3.639928 | -4.429825 | -0.099155 |
| H | 5.707033  | 0.214170  | -1.746472 | H               | -2.823170 | -5.988761 | 1.607800  |
| H | 6.559648  | -2.165267 | 0.774014  | H               | -1.473602 | -5.153417 | 3.515426  |
| H | 8.316741  | -3.288249 | -0.494376 | H               | -0.993154 | -2.721965 | 3.704318  |
| H | 7.868781  | -4.134569 | -2.781520 | H               | -1.858756 | -1.167056 | 2.066746  |
| H | 5.600867  | -3.878724 | -3.755243 | H               | -5.121665 | -2.664733 | -2.922397 |
| H | 3.833065  | -2.760153 | -2.486520 | H               | -4.468830 | -3.851186 | -4.969219 |
| H | 2.167574  | -1.403154 | 2.712622  | H               | -2.097545 | -4.439880 | -5.372631 |
| H | 2.717588  | -0.728028 | 4.995226  | H               | -0.379807 | -3.850258 | -3.676173 |
| H | 4.975308  | 0.153912  | 5.534481  | H               | -1.040919 | -2.670173 | -1.623800 |
| H | 6.663590  | 0.377515  | 3.727833  |                 |           |           |           |
| H | 6.123054  | -0.282629 | 1.448141  | <b>33GH</b>     |           |           |           |
| H | 3.499441  | -3.673925 | 2.129530  | 153             |           |           |           |
| H | 2.132280  | -5.680079 | 2.448003  | E: -4738.248811 |           |           |           |
| H | 0.240476  | -6.155590 | 0.911416  | C               | 1.821648  | 3.757193  | 0.743471  |
| H | -0.235463 | -4.621668 | -0.954091 | C               | 2.527422  | 2.565903  | 0.963419  |
| H | 1.142779  | -2.604712 | -1.294303 | C               | 2.422610  | 1.974147  | 2.228097  |
| H | -5.017730 | -0.228541 | 2.280703  | C               | 1.620115  | 2.523687  | 3.219228  |

|    |           |           |           |   |           |           |           |
|----|-----------|-----------|-----------|---|-----------|-----------|-----------|
| C  | 0.906925  | 3.688690  | 2.970411  | C | -2.078576 | -4.292122 | -4.024641 |
| C  | 1.016832  | 4.309925  | 1.731899  | C | -1.215223 | -3.933011 | -2.996193 |
| Si | 3.478400  | 1.748790  | -0.441066 | C | -1.680544 | -3.157579 | -1.943328 |
| C  | 2.842897  | -0.070112 | -0.767116 | C | 3.147655  | 2.698660  | -2.035470 |
| C  | 1.357776  | -0.009145 | -0.637416 | C | 4.199968  | 3.145698  | -2.839954 |
| C  | 0.772127  | -0.184820 | -1.858105 | C | 3.961022  | 3.760947  | -4.064779 |
| C  | 1.782018  | -0.388482 | -2.854598 | C | 2.659384  | 3.936468  | -4.513362 |
| C  | 2.985527  | -0.315888 | -2.235174 | C | 1.597294  | 3.509017  | -3.723685 |
| Si | 3.602817  | -1.610181 | 0.171949  | C | 1.841298  | 2.907044  | -2.497697 |
| C  | 5.279977  | -2.136565 | -0.556416 | C | 5.320554  | 1.774334  | -0.088000 |
| C  | 6.361361  | -2.421773 | 0.285689  | C | 5.825223  | 2.527783  | 0.977519  |
| C  | 7.590111  | -2.836021 | -0.215838 | C | 7.179274  | 2.508940  | 1.288217  |
| C  | 7.770597  | -2.993063 | -1.582273 | C | 8.055212  | 1.731588  | 0.538747  |
| C  | 6.699099  | -2.768398 | -2.438401 | C | 7.576923  | 0.992598  | -0.536764 |
| C  | 5.474733  | -2.358138 | -1.927944 | C | 6.223940  | 1.024314  | -0.848778 |
| P  | 0.079726  | 0.280698  | 0.605996  | O | 0.182482  | -0.413987 | 1.924667  |
| C  | -1.253375 | -0.025970 | -0.598428 | C | -5.228045 | 1.997007  | -0.304285 |
| C  | -0.687193 | -0.076106 | -1.846907 | C | -5.403954 | 2.484845  | -1.606396 |
| C  | -1.693588 | 0.118127  | -2.847341 | C | -6.659028 | 2.831531  | -2.085665 |
| C  | -2.880677 | 0.290494  | -2.211753 | C | -7.772311 | 2.717037  | -1.260821 |
| C  | -2.726803 | 0.148683  | -0.731666 | C | -7.615789 | 2.267685  | 0.042455  |
| Si | -3.475773 | 1.604937  | 0.269502  | C | -6.357057 | 1.914098  | 0.514290  |
| C  | -3.368176 | 1.217031  | 2.103622  | C | -2.517295 | 3.198094  | -0.047419 |
| C  | -4.284429 | 0.376440  | 2.749509  | C | -2.824423 | 4.297315  | 0.766270  |
| C  | -4.126057 | 0.026096  | 4.082425  | C | -2.272807 | 5.548315  | 0.529523  |
| C  | -3.030930 | 0.494153  | 4.798603  | C | -1.394683 | 5.728387  | -0.533312 |
| C  | -2.106278 | 1.322688  | 4.177968  | C | -1.070323 | 4.651613  | -1.346269 |
| C  | -2.281281 | 1.688609  | 2.849708  | C | -1.628624 | 3.399703  | -1.106172 |
| Si | -3.539520 | -1.628878 | -0.450645 | C | -3.012360 | -2.579537 | 1.083181  |
| C  | -3.006705 | -2.712445 | -1.895278 | C | -3.403054 | -3.929482 | 1.107568  |
| C  | -3.863416 | -3.099027 | -2.930040 | C | -3.074089 | -4.756041 | 2.171759  |
| C  | -3.405459 | -3.880971 | -3.984839 | C | -2.323705 | -4.254613 | 3.232339  |

|   |           |           |           |   |           |           |           |
|---|-----------|-----------|-----------|---|-----------|-----------|-----------|
| C | -1.916979 | -2.929035 | 3.217679  | H | 4.794849  | 4.101286  | -4.668906 |
| C | -2.269432 | -2.098045 | 2.158586  | H | 5.225041  | 3.013420  | -2.509348 |
| C | -5.420135 | -1.461207 | -0.426618 | H | 2.941246  | 1.051760  | 2.444192  |
| C | -6.143181 | -0.935541 | -1.505702 | H | 1.541818  | 2.019173  | 4.175294  |
| C | -7.525772 | -0.832450 | -1.472448 | H | 0.264124  | 4.111955  | 3.735219  |
| C | -8.226464 | -1.250587 | -0.347882 | H | 0.459507  | 5.215440  | 1.525111  |
| C | -7.535292 | -1.777758 | 0.733690  | H | 1.878207  | 4.254610  | -0.217919 |
| C | -6.149415 | -1.885794 | 0.689747  | H | 5.147201  | 3.114421  | 1.588763  |
| C | 3.874641  | -1.187922 | 1.991112  | H | 7.549936  | 3.093613  | 2.122996  |
| C | 2.957017  | -1.541688 | 2.986519  | H | 9.109553  | 1.703897  | 0.791035  |
| C | 3.135028  | -1.140463 | 4.305548  | H | 8.249349  | 0.378127  | -1.124537 |
| C | 4.242881  | -0.384621 | 4.665212  | H | 5.874348  | 0.429277  | -1.684978 |
| C | 5.179045  | -0.038233 | 3.698148  | H | 6.252741  | -2.324419 | 1.358352  |
| C | 4.994292  | -0.436682 | 2.381650  | H | 8.406912  | -3.037363 | 0.468408  |
| C | 2.446272  | -3.090161 | -0.042707 | H | 8.729879  | -3.309391 | -1.976848 |
| C | 2.867791  | -4.206664 | -0.777353 | H | 6.812369  | -2.922916 | -3.505891 |
| C | 2.068963  | -5.338299 | -0.901438 | H | 4.649424  | -2.234690 | -2.618439 |
| C | 0.832405  | -5.391608 | -0.273110 | H | 2.072575  | -2.110987 | 2.739405  |
| C | 0.398095  | -4.303044 | 0.472100  | H | 2.396944  | -1.415905 | 5.050338  |
| C | 1.187303  | -3.164499 | 0.572701  | H | 4.377661  | -0.067657 | 5.693709  |
| H | 3.940871  | -0.353843 | -2.736441 | H | 6.049753  | 0.552077  | 3.961128  |
| H | 1.614572  | -0.530457 | -3.913004 | H | 5.733701  | -0.138832 | 1.649017  |
| H | -3.834936 | 0.423549  | -2.700779 | H | 3.841254  | -4.209352 | -1.253053 |
| H | -1.537665 | 0.108630  | -3.916999 | H | 2.422954  | -6.183515 | -1.482023 |
| H | -1.376693 | 2.573703  | -1.762186 | H | 0.208383  | -6.274030 | -0.362609 |
| H | -0.377302 | 4.786806  | -2.168402 | H | -0.566042 | -4.327647 | 0.967232  |
| H | -0.962733 | 6.704472  | -0.725506 | H | 0.800217  | -2.331840 | 1.149375  |
| H | -2.531324 | 6.383771  | 1.170902  | H | -5.119862 | -0.041465 | 2.200667  |
| H | -3.514746 | 4.175883  | 1.596266  | H | -4.844743 | -0.633716 | 4.555205  |
| H | 1.000489  | 2.588433  | -1.892440 | H | -2.895350 | 0.205657  | 5.835110  |
| H | 0.576344  | 3.642171  | -4.066705 | H | -1.237405 | 1.678854  | 4.719491  |
| H | 2.471023  | 4.408399  | -5.471394 | H | -1.546912 | 2.343635  | 2.392761  |

|                           |           |           |           |    |           |           |           |
|---------------------------|-----------|-----------|-----------|----|-----------|-----------|-----------|
| H                         | -5.626659 | -0.590454 | -2.393836 | C  | -3.772140 | 1.357826  | 3.479984  |
| H                         | -8.054243 | -0.408513 | -2.318397 | C  | -3.509196 | 2.489029  | 2.718551  |
| H                         | -9.306887 | -1.163556 | -0.315863 | C  | -3.631741 | 3.766829  | 3.263540  |
| H                         | -8.073645 | -2.111846 | 1.613910  | C  | -4.014130 | 3.932676  | 4.584810  |
| H                         | -5.627794 | -2.312154 | 1.540476  | C  | -4.270670 | 2.812981  | 5.369432  |
| H                         | -4.542088 | 2.616773  | -2.254104 | C  | -4.155129 | 1.548281  | 4.819137  |
| H                         | -6.767182 | 3.205001  | -3.098131 | C  | -3.806482 | -0.732789 | 0.957309  |
| H                         | -8.754876 | 2.989953  | -1.629969 | C  | -2.740117 | -0.139691 | 0.025709  |
| H                         | -8.476278 | 2.186588  | 0.697130  | C  | -3.414680 | 0.460792  | -1.002567 |
| H                         | -6.265163 | 1.577283  | 1.539204  | C  | -4.825700 | 0.446569  | -0.813456 |
| H                         | -3.965547 | -4.344688 | 0.275970  | C  | -5.065443 | -0.201824 | 0.345391  |
| H                         | -3.389560 | -5.793586 | 2.168132  | P  | -1.116946 | 0.802513  | 0.062430  |
| H                         | -2.050098 | -4.901997 | 4.058457  | O  | -0.901696 | 1.481488  | 1.362658  |
| H                         | -1.318461 | -2.523954 | 4.025446  | C  | -2.669635 | 1.289087  | -1.929905 |
| H                         | -1.921326 | -1.077158 | 2.187879  | C  | -1.537540 | 1.868847  | -1.417825 |
| H                         | -4.906049 | -2.799901 | -2.914063 | C  | -1.234129 | 3.067691  | -2.304864 |
| H                         | -4.088685 | -4.173734 | -4.774870 | C  | -2.157245 | 2.825251  | -3.454295 |
| H                         | -1.722697 | -4.901674 | -4.848322 | C  | -3.023842 | 1.818203  | -3.191970 |
| H                         | -0.181561 | -4.262035 | -2.997598 | Si | -4.366051 | -2.612596 | 0.446042  |
| H                         | -0.993963 | -2.901162 | -1.146863 | C  | -5.092414 | -2.936818 | -1.305285 |
| H                         | -0.015422 | 1.684260  | 0.717233  | C  | -5.067173 | -2.154623 | -2.462089 |
|                           |           |           |           | C  | -5.699049 | -2.549836 | -3.635480 |
| <b>{33G}</b> <sub>2</sub> |           |           |           | C  | -6.378445 | -3.756586 | -3.697142 |
| 304                       |           |           |           | C  | -6.407725 | -4.567526 | -2.570933 |
| E= -9475.178228           |           |           |           | C  | -5.780568 | -4.158529 | -1.402123 |
| C                         | -6.677170 | 0.204628  | 3.124442  | Si | -2.566781 | 4.526755  | -1.743668 |
| C                         | -5.691596 | -0.733007 | 3.465662  | C  | -1.929965 | 5.389302  | -0.197462 |
| C                         | -6.041044 | -1.721514 | 4.385726  | C  | -1.275923 | 4.663289  | 0.801795  |
| C                         | -7.325122 | -1.796170 | 4.915179  | C  | -0.850005 | 5.279798  | 1.971191  |
| C                         | -8.292325 | -0.876766 | 4.538009  | C  | -1.084297 | 6.632629  | 2.172868  |
| C                         | -7.962636 | 0.130780  | 3.638659  | C  | -1.738000 | 7.369102  | 1.192724  |
| Si                        | -3.897899 | -0.430975 | 2.887655  | C  | -2.148205 | 6.754601  | 0.017260  |

|    |           |           |           |    |           |           |           |
|----|-----------|-----------|-----------|----|-----------|-----------|-----------|
| Si | 0.420627  | 3.970070  | -2.793169 | C  | 6.149186  | 0.318818  | 0.297382  |
| C  | 0.609031  | 3.866647  | -4.680812 | Si | 2.133831  | -1.759083 | -3.967120 |
| C  | 1.369912  | 4.825271  | -5.364073 | C  | 0.359939  | -1.187800 | -4.142869 |
| C  | 1.633808  | 4.709287  | -6.723559 | C  | -0.145315 | -0.691646 | -5.352879 |
| C  | 1.155028  | 3.616751  | -7.436067 | C  | -1.512142 | -0.584637 | -5.572744 |
| C  | 0.422187  | 2.640303  | -6.774645 | C  | -2.403636 | -0.988630 | -4.585663 |
| C  | 0.157346  | 2.765863  | -5.416482 | C  | -1.922606 | -1.433689 | -3.366149 |
| O  | 0.232349  | -0.039615 | -0.374172 | C  | -0.559334 | -1.509364 | -3.145096 |
| P  | 1.194589  | -1.253700 | 0.375742  | Si | 1.436842  | -4.598408 | -2.432666 |
| C  | 2.239521  | -2.008622 | -1.005993 | C  | 2.413280  | -5.714337 | -3.644689 |
| C  | 3.468961  | -2.189164 | -0.431818 | C  | 1.942693  | -6.125077 | -4.893177 |
| C  | 4.368798  | -2.938995 | -1.245621 | C  | 2.668257  | -7.001242 | -5.693932 |
| C  | 3.699179  | -3.266823 | -2.364140 | C  | 3.884626  | -7.502962 | -5.259588 |
| C  | 2.275159  | -2.798090 | -2.331100 | C  | 4.361689  | -7.137049 | -4.005742 |
| C  | 3.661781  | -1.675583 | 0.886631  | C  | 3.630314  | -6.266097 | -3.213070 |
| C  | 2.758684  | -0.760342 | 1.379120  | C  | 2.006013  | -2.361673 | 4.793569  |
| C  | 3.328783  | -0.332400 | 2.755502  | C  | 1.909082  | -2.805580 | 6.121127  |
| C  | 4.507729  | -1.252072 | 2.904983  | C  | 1.623909  | -4.127195 | 6.426301  |
| C  | 4.684317  | -2.023406 | 1.820736  | C  | 1.393795  | -5.038521 | 5.402578  |
| Si | 2.523385  | -0.568120 | 4.518024  | C  | 1.454799  | -4.614108 | 4.084381  |
| C  | 1.154298  | 0.634246  | 4.913381  | C  | 1.771418  | -3.292971 | 3.784359  |
| C  | 0.826767  | 0.927988  | 6.245605  | C  | 3.857561  | -0.332155 | 5.856848  |
| C  | -0.119960 | 1.894057  | 6.552743  | C  | 4.698166  | -1.393590 | 6.220600  |
| C  | -0.763735 | 2.583076  | 5.527858  | C  | 5.649747  | -1.261536 | 7.221360  |
| C  | -0.481921 | 2.271261  | 4.207115  | C  | 5.781732  | -0.055158 | 7.897341  |
| C  | 0.468254  | 1.304372  | 3.905541  | C  | 4.958314  | 1.009221  | 7.562013  |
| Si | 4.400343  | 1.341206  | 2.540744  | C  | 4.011908  | 0.867994  | 6.554838  |
| C  | 5.743052  | 1.331683  | 1.169102  | C  | 2.553894  | -2.824368 | -5.500354 |
| C  | 6.528402  | 2.496968  | 1.174813  | C  | 1.626740  | -3.105388 | -6.510109 |
| C  | 7.641470  | 2.642987  | 0.359523  | C  | 1.973192  | -3.824079 | -7.649172 |
| C  | 8.032311  | 1.607577  | -0.480415 | C  | 3.269676  | -4.285370 | -7.814427 |
| C  | 7.277783  | 0.444176  | -0.505995 | C  | 4.220037  | -3.996665 | -6.843528 |



|   |           |           |           |   |           |           |           |
|---|-----------|-----------|-----------|---|-----------|-----------|-----------|
| C | 3.866677  | -3.267196 | -5.718956 | C | -5.282469 | 3.681981  | -2.304811 |
| C | 3.388299  | -0.367630 | -4.108279 | C | -6.593018 | 3.388388  | -1.960230 |
| C | 4.767514  | -0.521636 | -3.921032 | C | -6.963033 | 3.303605  | -0.618651 |
| C | 5.658375  | 0.471197  | -4.304841 | C | -6.017641 | 3.538631  | 0.366595  |
| C | 5.191999  | 1.643339  | -4.887561 | C | -4.710287 | 3.849949  | 0.005709  |
| C | 3.827913  | 1.829117  | -5.059083 | C | -2.970249 | 5.804081  | -3.101075 |
| C | 2.943706  | 0.832813  | -4.668997 | C | -4.002788 | 6.698426  | -2.778154 |
| C | -0.362810 | -4.654623 | -2.971739 | C | -4.446690 | 7.662079  | -3.674187 |
| C | -1.361252 | -5.106076 | -2.106971 | C | -3.883534 | 7.746784  | -4.940603 |
| C | -2.670140 | -5.271443 | -2.545898 | C | -2.879146 | 6.857759  | -5.296503 |
| C | -3.012465 | -4.985995 | -3.858360 | C | -2.433843 | 5.905980  | -4.387335 |
| C | -2.037354 | -4.524984 | -4.733581 | C | 0.493569  | 5.796837  | -2.276029 |
| C | -0.736005 | -4.363255 | -4.289382 | C | 0.972291  | 6.068294  | -0.987755 |
| C | 1.656941  | -5.614244 | -0.847266 | C | 1.142079  | 7.364958  | -0.531020 |
| C | 1.206054  | -6.939570 | -0.943529 | C | 0.831144  | 8.439478  | -1.355232 |
| C | 1.483230  | -7.877434 | 0.040389  | C | 0.366846  | 8.200367  | -2.639992 |
| C | 2.244003  | -7.518343 | 1.147631  | C | 0.211857  | 6.894679  | -3.092738 |
| C | 2.695370  | -6.211107 | 1.268354  | C | 2.031078  | 3.286729  | -2.144653 |
| C | 2.390915  | -5.270706 | 0.289061  | C | 3.143210  | 4.120560  | -2.347428 |
| C | 5.607556  | 1.693318  | 3.990758  | C | 4.429434  | 3.652916  | -2.156954 |
| C | 5.619748  | 2.930396  | 4.644914  | C | 4.629354  | 2.343716  | -1.739944 |
| C | 6.630759  | 3.280411  | 5.533266  | C | 3.543498  | 1.521067  | -1.492035 |
| C | 7.665256  | 2.397385  | 5.797795  | C | 2.250796  | 1.983862  | -1.710669 |
| C | 7.690690  | 1.171387  | 5.144650  | C | -2.949927 | -3.805558 | 0.738422  |
| C | 6.688639  | 0.838827  | 4.246252  | C | -3.189986 | -5.184511 | 0.811683  |
| C | 3.391274  | 2.924750  | 2.407139  | C | -2.192330 | -6.072380 | 1.188630  |
| C | 3.568156  | 3.792670  | 1.326627  | C | -0.920285 | -5.597345 | 1.479307  |
| C | 3.133278  | 5.111176  | 1.380703  | C | -0.653826 | -4.241860 | 1.364461  |
| C | 2.470460  | 5.581851  | 2.504816  | C | -1.658138 | -3.357721 | 1.005213  |
| C | 2.235347  | 4.722610  | 3.571106  | C | -5.851748 | -3.225938 | 1.481657  |
| C | 2.700649  | 3.416776  | 3.522510  | C | -7.136010 | -2.742296 | 1.192635  |
| C | -4.303653 | 3.901736  | -1.323634 | C | -8.266841 | -3.247469 | 1.813093  |

|   |           |           |           |   |           |           |           |
|---|-----------|-----------|-----------|---|-----------|-----------|-----------|
| C | -8.154127 | -4.286824 | 2.728629  | H | -4.494048 | 6.630490  | -1.812676 |
| C | -6.901358 | -4.804088 | 3.014500  | H | -5.244097 | 8.337341  | -3.384531 |
| C | -5.770358 | -4.274455 | 2.402681  | H | -4.232651 | 8.491379  | -5.647279 |
| C | -2.783100 | -1.508083 | 3.947404  | H | -2.433717 | 6.901126  | -6.284381 |
| C | -2.900101 | -2.901172 | 3.917305  | H | -1.634399 | 5.249359  | -4.710241 |
| C | -2.273252 | -3.713006 | 4.848780  | H | 1.775851  | 5.675948  | -4.828448 |
| C | -1.514610 | -3.136257 | 5.856987  | H | 2.221490  | 5.470705  | -7.224590 |
| C | -1.360292 | -1.758807 | 5.896555  | H | 1.362212  | 3.521452  | -8.496023 |
| C | -1.982075 | -0.952550 | 4.950982  | H | 0.060880  | 1.771020  | -7.313624 |
| H | -2.176850 | 3.430522  | -4.343471 | H | -0.399332 | 1.975264  | -4.924880 |
| H | -3.857814 | 1.508528  | -3.802854 | H | 1.216693  | 5.249141  | -0.323196 |
| H | -6.040217 | -0.385590 | 0.768399  | H | 1.499914  | 7.535215  | 0.477519  |
| H | -5.555921 | 0.898064  | -1.468189 | H | 0.954188  | 9.456249  | -0.998270 |
| H | 5.395105  | -3.180745 | -1.005975 | H | 0.127196  | 9.027546  | -3.298929 |
| H | 4.104062  | -3.818419 | -3.195915 | H | -0.133687 | 6.748847  | -4.106116 |
| H | 5.139266  | -1.243897 | 3.777875  | H | 3.002672  | 5.145573  | -2.673410 |
| H | 5.474167  | -2.742789 | 1.655300  | H | 5.279700  | 4.301323  | -2.338833 |
| H | -3.184214 | 2.374560  | 1.694065  | H | 5.634271  | 1.970128  | -1.615700 |
| H | -3.413332 | 4.640300  | 2.660706  | H | 3.699191  | 0.500680  | -1.164479 |
| H | -4.110309 | 4.929539  | 5.001587  | H | 1.419801  | 1.305804  | -1.565375 |
| H | -4.568830 | 2.925612  | 6.406023  | H | 1.884214  | 1.009842  | -4.796763 |
| H | -4.389773 | 0.690107  | 5.440719  | H | 3.440134  | 2.750489  | -5.479218 |
| H | -3.996646 | 4.083116  | 0.778776  | H | 5.889726  | 2.418448  | -5.184912 |
| H | -6.283134 | 3.493641  | 1.417408  | H | 6.721842  | 0.331780  | -4.142492 |
| H | -7.987632 | 3.069736  | -0.350518 | H | 5.158994  | -1.421418 | -3.462581 |
| H | -7.333033 | 3.232431  | -2.737874 | H | 0.538728  | -0.415707 | -6.149671 |
| H | -5.021171 | 3.768946  | -3.353629 | H | -1.879955 | -0.209879 | -6.522173 |
| H | -2.611336 | 7.362169  | -0.750655 | H | -3.471642 | -0.958037 | -4.770313 |
| H | -1.912056 | 8.430486  | 1.332470  | H | -2.593947 | -1.773744 | -2.591584 |
| H | -0.753762 | 7.111996  | 3.088460  | H | -0.222291 | -1.894603 | -2.192784 |
| H | -0.331324 | 4.696065  | 2.720135  | H | 0.606436  | -2.753263 | -6.424510 |
| H | -1.080517 | 3.602158  | 0.694312  | H | 1.222204  | -4.021848 | -8.406421 |

|   |           |           |           |   |           |           |           |
|---|-----------|-----------|-----------|---|-----------|-----------|-----------|
| H | 3.542492  | -4.855141 | -8.695732 | H | -4.814132 | -4.713747 | 2.654112  |
| H | 5.242620  | -4.335871 | -6.963560 | H | -5.303421 | -2.449668 | 4.702506  |
| H | 4.649733  | -3.024571 | -5.011125 | H | -7.567419 | -2.581848 | 5.622296  |
| H | -3.502519 | -3.371038 | 3.158008  | H | -9.293951 | -0.936275 | 4.949854  |
| H | -2.381097 | -4.790282 | 4.786280  | H | -8.702561 | 0.870781  | 3.352908  |
| H | -1.031308 | -3.758580 | 6.598808  | H | -6.428390 | 1.032618  | 2.466501  |
| H | -0.748768 | -1.300707 | 6.664437  | H | -4.173567 | -5.581411 | 0.589579  |
| H | -1.848309 | 0.119825  | 5.012211  | H | -2.405509 | -7.134088 | 1.245483  |
| H | 1.332538  | 0.413037  | 7.056433  | H | -0.132969 | -6.286127 | 1.759847  |
| H | -0.352053 | 2.114286  | 7.589157  | H | 0.337934  | -3.862024 | 1.554818  |
| H | -1.501690 | 3.342541  | 5.756287  | H | -1.428293 | -2.300070 | 0.964986  |
| H | -1.004147 | 2.757389  | 3.397736  | H | -4.568919 | -1.199191 | -2.459737 |
| H | 0.674207  | 1.109242  | 2.861395  | H | -5.667200 | -1.900786 | -4.504003 |
| H | 2.545730  | 2.787996  | 4.389973  | H | -6.880889 | -4.060720 | -4.608728 |
| H | 1.703170  | 5.068324  | 4.450778  | H | -6.935010 | -5.514855 | -2.591388 |
| H | 2.129685  | 6.610529  | 2.551110  | H | -5.871613 | -4.802262 | -0.535127 |
| H | 3.323181  | 5.765942  | 0.538232  | H | -1.120486 | -5.344692 | -1.080046 |
| H | 4.084157  | 3.455695  | 0.438207  | H | -3.425360 | -5.622700 | -1.854834 |
| H | 6.279236  | 3.314029  | 1.843220  | H | -4.035873 | -5.111506 | -4.189701 |
| H | 8.213146  | 3.563632  | 0.395410  | H | -2.290982 | -4.277587 | -5.758482 |
| H | 8.910986  | 1.709291  | -1.107739 | H | -0.002176 | -3.982820 | -4.983009 |
| H | 7.553501  | -0.372125 | -1.165098 | H | 0.645307  | -7.254321 | -1.818466 |
| H | 5.580282  | -0.589330 | 0.214145  | H | 1.120696  | -8.893749 | -0.066822 |
| H | 4.838488  | 3.654340  | 4.455461  | H | 2.484641  | -8.252569 | 1.908755  |
| H | 6.604458  | 4.251462  | 6.016209  | H | 3.286990  | -5.913716 | 2.126890  |
| H | 8.452776  | 2.663855  | 6.494212  | H | 2.748864  | -4.261005 | 0.420586  |
| H | 8.502940  | 0.475451  | 5.323083  | H | 0.992370  | -5.769621 | -5.264766 |
| H | 6.782710  | -0.097041 | 3.707961  | H | 2.275541  | -7.284846 | -6.663961 |
| H | -7.270102 | -1.972027 | 0.441222  | H | 4.452231  | -8.183971 | -5.884318 |
| H | -9.240049 | -2.834187 | 1.574210  | H | 5.299138  | -7.540861 | -3.638936 |
| H | -9.037964 | -4.688905 | 3.211275  | H | 4.011773  | -6.019793 | -2.226933 |
| H | -6.794521 | -5.619594 | 3.721373  | H | 1.847238  | -2.987801 | 2.747031  |

|   |          |           |          |
|---|----------|-----------|----------|
| H | 1.266566 | -5.316275 | 3.283578 |
| H | 1.162357 | -6.073159 | 5.631392 |
| H | 1.575108 | -4.444038 | 7.462710 |
| H | 2.091982 | -2.112701 | 6.935992 |
| H | 3.389004 | 1.720483  | 6.309257 |
| H | 5.061545 | 1.960098  | 8.071743 |
| H | 6.525642 | 0.055482  | 8.678611 |
| H | 6.285033 | -2.102686 | 7.476479 |
| H | 4.598208 | -2.353699 | 5.724160 |
